# Supplementary material for: Conservation tillage and fertiliser management strategies impact on basmati rice (Oryza sativa L): crop performance, crop water productivity, nutrient uptake and fertility status of the soil under rice-wheat cropping system
Source: PeerJ. 2023 Nov 1;11:e16271. doi: 10.7717/peerj.16271 (PMC10625351; doi:10.7717/peerj.16271)
Supplement: Supplemental Information 1 [file peerj-11-16271-s001.xlsx]

## Sheet: Effective tillers
		2019
		No. of effective tillers
Main factors	2
Sub factors	9	Total factors	18
Replications	3
Treatments	R1	R2	R3	Total	Mean									Factors Mean
E1T1	220.15	265.58	295.56	781.29	260.43				ANOVA					1	371.03	2
E1T2	374.56	382.16	354.56	1111.28	370.427		df	SS	MSS	Cal F	Table F	Result		2	381.631	1
E1T3	414.56	381.56	426.56	1222.68	407.56	Replication	2	2876.83	1438.41	4.10336	3.2759	S		SE.m	3.60322
E1T4	371.2	315.68	383.26	1070.14	356.713	Treatment	17	106532	6266.61	17.8767	1.93321	S	Factor A	CD	10.3557
E1T5	407.26	405.21	403.21	1215.68	405.227	Factor A	1	1517.07	1517.07	4.32774	4.13002	S		1	269.55	9	9
E1T6	427.56	411.25	421.23	1260.04	420.013	Factor B	8	3.51008e+07	4.3876e+06	12516.5	2.22534	S		2	379.892	5	5
E1T7	393.26	361.02	362.43	1116.71	372.237	A*B	8	-3.49958e+07	-4.37447e+06	-12479	2.22534	NS		3	412.563	2	2
E1T8	405.26	400.8	386.54	1192.6	397.533	Error	34	11918.6	350.546					4	362.463	7	7
E1T9	366.58	343.25	337.56	1047.39	349.13	Total	53	121328		t34=	2.03224			5	407.82	3	3
E2T1	258	282.56	295.45	836.01	278.67	SE.m	10.8097							6	424.953	1	1
E2T2	405.26	364.25	398.56	1168.07	389.357	CD	31.0672							7	373.172	6	6
E2T3	421.56	409.58	421.56	1252.7	417.567	CV	4.97511							8	402.262	4	4
E2T4	383.52	328.56	392.56	1104.64	368.213									9	354.298	8	8
E2T5	412.56	402.15	416.53	1231.24	410.413									SE.m	7.64358
E2T6	429.86	424.56	435.26	1289.68	429.893								Factor B	CD	21.9679
E2T7	396.2	361.54	364.58	1122.32	374.107
E2T8	415.26	400.15	405.56	1220.97	406.99
E2T9	386.59	350.25	341.56	1078.4	359.467
Total	6889.2	6590.11	6842.53	20321.8	376.33
Mean	382.733	366.117	380.141
CF	7.64773e+06
TSSQ	121328	RSSQ	2876.83
tSSQ	106532	ESSQ	11918.6
		2020
Main factors	2
Sub factors	9	Total factors	18
Replications	3
Treatments	R1	R2	R3	Total	Mean									Factors Mean
E1T1	244.65	272.56	295.54	812.75	270.917				ANOVA					1	376.331	2
E1T2	375.49	354.16	402.15	1131.8	377.267		df	SS	MSS	Cal F	Table F	Result		2	388.157	1
E1T3	415.68	405.26	416.58	1237.52	412.507	Replication	2	6632.52	3316.26	9.46028	3.2759	S		SE.m	3.83296
E1T4	376.45	321.52	384.56	1082.53	360.843	Treatment	17	102897	6052.75	17.2666	1.93321	S	Factor A	CD	11.016
E1T5	408.56	406.58	404.52	1219.66	406.553	Factor A	1	1888.25	1888.25	5.38659	4.13002	S		1	279.123	9	9
E1T6	438.58	416.58	421.56	1276.72	425.573	Factor B	8	3.61344e+07	4.51679e+06	12885	2.22534	S		2	384.248	5	5
E1T7	394.52	361.52	362.45	1118.49	372.83	A*B	8	-3.60334e+07	-4.50417e+06	-12849	2.22534	NS		3	420.077	2	2
E1T8	414.56	390.15	401.26	1205.97	401.99	Error	34	13486.8	396.672					4	369.7	7	7
E1T9	395.68	341.56	338.25	1075.49	358.497	Total	53	123016		t34=	2.03224			5	411.352	3	3
E2T1	256.89	286.56	318.54	861.99	287.33	SE.m	11.4989							6	433.015	1	1
E2T2	405.65	365.89	402.15	1173.69	391.23	CD	33.0481							7	373.915	6	6
E2T3	431.56	410.8	440.58	1282.94	427.647	CV	5.21045							8	407.307	4	4
E2T4	385.65	332.5	417.52	1135.67	378.557									9	361.46	8	8
E2T5	432.15	409.8	406.5	1248.45	416.15									SE.m	8.13093
E2T6	454.65	411.56	455.16	1321.37	440.457								Factor B	CD	23.3685
E2T7	396.58	362.56	365.86	1125	375
E2T8	432.15	401.21	404.51	1237.87	412.623
E2T9	399.85	351.26	342.16	1093.27	364.423
Total	7059.3	6602.03	6979.85	20641.2	382.244
Mean	392.183	366.779	387.769
CF	7.88997e+06
TSSQ	123016	RSSQ	6632.52
tSSQ	102897	ESSQ	13486.8

## Sheet: PANICLE LENGTH
		2019
		Panicle length
Main factors	2
Sub factors	9	Total factors	18
Replications	3
Treatments	R1	R2	R3	Total	Mean									Factors Mean
E1T1	22.5	16.8	15.1	54.4	18.1333				ANOVA					1	21.9074	2
E1T2	19.2	22.5	23.1	64.8	21.6		df	SS	MSS	Cal F	Table F	Result		2	23.4185	1
E1T3	27.5	24.3	20.2	72	24	Replication	2	27.9659	13.983	2.29287	3.2759	NS		SE.m	0.475256
E1T4	22.8	20.1	19.6	62.5	20.8333	Treatment	17	279.513	16.4419	2.69608	1.93321	S	Factor A	CD	1.3659
E1T5	24.6	24.7	23.5	72.8	24.2667	Factor A	1	30.8267	30.8267	5.05483	4.13002	S		1	18.7333	9	9
E1T6	23.1	24.6	27.5	75.2	25.0667	Factor B	8	127221	15902.6	2607.64	2.22534	S		2	22.4833	5	5
E1T7	24.5	21.5	17.5	63.5	21.1667	A*B	8	-126972	-15871.5	-2602.55	2.22534	NS		3	24.9167	2	2
E1T8	26.1	20.5	19.5	66.1	22.0333	Error	34	207.347	6.09845					4	21.5667	7	7
E1T9	22.5	19.2	18.5	60.2	20.0667	Total	53	514.826		t34=	2.03224			5	24.7667	3	3
E2T1	15.4	19.1	23.5	58	19.3333	SE.m	1.42577							6	26	1	1
E2T2	23.8	22.9	23.4	70.1	23.3667	CD	4.0977							7	22.1167	6	6
E2T3	28.2	26.5	22.8	77.5	25.8333	CV	10.8967							8	22.6167	4	4
E2T4	21.8	21.6	23.5	66.9	22.3									9	20.7667	8	8
E2T5	24.8	25.2	25.8	75.8	25.2667									SE.m	1.00817
E2T6	28.8	22.5	29.5	80.8	26.9333								Factor B	CD	2.89751
E2T7	25.2	22.5	21.5	69.2	23.0667
E2T8	23.5	21.5	24.6	69.6	23.2
E2T9	21.9	21.6	20.9	64.4	21.4667
Total	426.2	397.6	400	1223.8	22.663
Mean	23.6778	22.0889	22.2222
CF	27734.9
TSSQ	514.826	RSSQ	27.9659
tSSQ	279.513	ESSQ	207.347
		2020
		Panicle length
Main factors	2
Sub factors	9	Total factors	18
Replications	3
Treatments	R1	R2	R3	Total	Mean									Factors Mean
E1T1	24.8	17.8	14.5	57.1	19.0333				ANOVA					1	22.3407	2
E1T2	20.5	21.9	22.6	65	21.6667		df	SS	MSS	Cal F	Table F	Result		2	23.9889	1
E1T3	26.5	25.2	21.8	73.5	24.5	Replication	2	69.1626	34.5813	5.6705	3.2759	S		SE.m	0.507487
E1T4	23.2	21.6	20.5	65.3	21.7667	Treatment	17	243.096	14.2998	2.34482	1.93321	S	Factor A	CD	1.45853
E1T5	25.8	24.8	22.8	73.4	24.4667	Factor A	1	36.6713	36.6713	6.01321	4.13002	S		1	19.55	9	9
E1T6	21.8	25.8	28.6	76.2	25.4	Factor B	8	132456	16557	2714.95	2.22534	S		2	23.0167	5	5
E1T7	25.2	22.5	17.8	65.5	21.8333	A*B	8	-132250	-16531.2	-2710.72	2.22534	NS		3	25.2	2	2
E1T8	26.8	20.8	18.5	66.1	22.0333	Error	34	236.424	6.95365					4	22.4833	7	7
E1T9	23.5	19.5	18.1	61.1	20.3667	Total	53	548.683		t34=	2.03224			5	24.6333	3	3
E2T1	20.5	16.5	23.2	60.2	20.0667	SE.m	1.52246							6	26.3333	1	1
E2T2	26.8	24.2	22.1	73.1	24.3667	CD	4.37559							7	22.8	6	6
E2T3	28.2	26.3	23.2	77.7	25.9	CV	11.3835							8	23.15	4	4
E2T4	22.8	21.6	25.2	69.6	23.2									9	21.3167	8	8
E2T5	25.2	26.8	22.4	74.4	24.8									SE.m	1.07654
E2T6	29.5	22.5	29.8	81.8	27.2667								Factor B	CD	3.09401
E2T7	24.9	23.6	22.8	71.3	23.7667
E2T8	27.8	23.5	21.5	72.8	24.2667
E2T9	21.2	23.8	21.8	66.8	22.2667
Total	445	408.7	397.2	1250.9	23.1648
Mean	24.7222	22.7056	22.0667
CF	28976.9
TSSQ	548.683	RSSQ	69.1626
tSSQ	243.096	ESSQ	236.424

## Sheet: NPK UPTAKES (kg ha-1)
	Maize N, K & Bio fertigation - yield attributes- 2018-19
N UPTAKE AT 30 DAS (kg ha-1)
Treatments	R1	R2	R3	Total	Mean			ANOVA					Factors Mean
T1- 100%RDF-M0	19.4333	13.0787	11.4849	43.997	14.6657								1	13.0869
T2- 100%RDF-SM	12.494	9.02156	16.2609	37.7765	12.5922		df	SS	MSS	Cal F	Table F		0.75	13.0033
T3-100%RDF-FM3	14.2803	12.9121	14.4317	41.6241	13.8747	Replication	2	20.2119	10.106	0.599038	3.73889	ns	SE.m	1.18569
T4-100%RDF-FM5	10.8509	12.1975	10.5966	33.645	11.215	Treatment	7	42.8499	6.12141	0.362851	2.7642	ns	CD	3.59642
T5- 75%RDF-M0	10	17.1477	12.4077	39.5554	13.1851	RDF	1	0.0419262	0.0419262	0.00248521	4.60011	ns	MC0	13.9254
T6- 75%RDF-SM	10.5127	8.5761	13.1092	32.198	10.7327	MC	3	21.1521	7.05069	0.417935	3.34389	ns	SMC	11.6624
T7-75%RDF-FM3	9.77914	22.8983	9.05709	41.7345	13.9115	RDFxMC	3	21.6559	7.21862	0.427889	3.34389	ns	MC3	13.8931
T8-75%RDF-FM5	12.2622	18.8989	11.3904	42.5515	14.1838	Error	14	236.185	16.8703				MC5	12.6994
Total	99.6126	114.731	98.7385	313.082	13.0451	Total	23	299.246		t14=	2.14479		SE.m	1.67682
Mean	12.4516	14.3414	12.3423			SE.m	2.37138						CD	5.0861
CF	4084.18					CD	7.19284
TSSQ	299.246	RSSQ	20.2119			CV	31.4858
tSSQ	42.8499	ESSQ	236.185
N UPTAKE AT 60 DAS (kg ha-1)
Treatments	R1	R2	R3	Total	Mean			ANOVA					Factors Mean
T1- 100%RDF-M0	142.353	208.457	229.205	580.015	193.338								1	194.745
T2- 100%RDF-SM	126.377	181.688	231.024	539.089	179.696		df	SS	MSS	Cal F	Table F		0.75	162.821
T3-100%RDF-FM3	163.692	185.281	240.187	589.159	196.386	Replication	2	33453.6	16726.8	22.5281	3.73889	sig	SE.m	7.86599
T4-100%RDF-FM5	187.879	217.454	223.338	628.672	209.557	Treatment	7	28143.5	4020.5	5.41492	2.7642	sig	CD	23.859
T5- 75%RDF-M0	0	157.14	151.278	308.418	102.806	RDF	1	6114.71	6114.71	8.23545	4.60011	sig	MC0	148.072
T6- 75%RDF-SM	133.33	125.904	187.052	446.286	148.762	MC	3	14252.8	4750.95	6.3987	3.34389	sig	SMC	164.229
T7-75%RDF-FM3	128.827	212.218	218.872	559.917	186.639	RDFxMC	3	7775.95	2591.98	3.49095	3.34389	sig	MC3	191.513
T8-75%RDF-FM5	147.94	224.172	267.119	639.23	213.077	Error	14	10394.8	742.486				MC5	211.317
Total	1030.4	1512.31	1748.07	4290.79	178.783	Total	23	71991.9		t14=	2.14479		SE.m	11.1242
Mean	128.8	189.039	218.509			SE.m	15.732						CD	33.7418
CF	767118					CD	47.7181
TSSQ	71991.9	RSSQ	33453.6			CV	15.2412
tSSQ	28143.5	ESSQ	10394.8
N UPTAKE AT 90 DAS (kg ha-1)
Treatments	R1	R2	R3	Total	Mean			ANOVA					Factors Mean
T1- 100%RDF-M0	328.859	252.279	258.27	839.407	279.802								1	328.585
T2- 100%RDF-SM	298.986	297.732	354.776	951.495	317.165		df	SS	MSS	Cal F	Table F		0.75	329.05
T3-100%RDF-FM3	360.178	316.661	360.359	1037.2	345.733	Replication	2	-1.10943e+06	-554713	-6.00649	3.73889	ns	SE.m	87.727
T4-100%RDF-FM5	394.787	309.165	410.968	1114.92	371.64	Treatment	7	43086.1	6155.15	0.0666486	2.7642	ns	CD	266.092
T5- 75%RDF-M0	0	267.259	477.089	744.348	248.116	RDF	1	1.29579	1.29579	1.4031e-05	4.60011	ns	MC0	263.959
T6- 75%RDF-SM	292.686	367.866	369.949	1030.5	343.5	MC	3	40385	13461.7	0.145764	3.34389	ns	SMC	330.333
T7-75%RDF-FM3	248.832	286.789	493.761	1029.38	343.127	RDFxMC	3	2699.79	899.931	0.00974455	3.34389	ns	MC3	344.43
T8-75%RDF-FM5	360.254	483.815	300.299	1144.37	381.456	Error	14	1.29293e+06	92352.2				MC5	376.548
Total	2284.58	2581.57		7891.62	328.817	Total	23	226591		t14=	2.14479		SE.m	124.065
Mean	285.573	322.696	#VALUE!			SE.m	175.454						CD	376.311
CF	2.5949e+06					CD	532.184
TSSQ	226591	RSSQ	-1.10943e+06			CV	92.4206
tSSQ	43086.1	ESSQ	1.29293e+06
N UPTAKE IN STRAW AT HARVEST (kg ha-1)
Treatments	R1	R2	R3	Total	Mean			ANOVA					Factors Mean
T1- 100%RDF-M0	123.62	167.721	146.78	438.121	146.04								1	147.071
T2- 100%RDF-SM	110.381	104.808	95.7596	310.949	103.65		df	SS	MSS	Cal F	Table F		0.75	127.435
T3-100%RDF-FM3	180.991	224.725	93.5838	499.3	166.433	Replication	2	4854.14	2427.07	1.23856	3.73889	ns	SE.m	12.7789
T4-100%RDF-FM5	196.261	182.318	137.899	516.478	172.159	Treatment	7	37505.4	5357.92	2.73419	2.7642	ns	CD	38.7607
T5- 75%RDF-M0	0	153.531	106.337	259.868	86.6225	RDF	1	2313.43	2313.43	1.18057	4.60011	ns	MC0	116.331
T6- 75%RDF-SM	76.9647	95.8343	107.758	280.557	93.519	MC	3	27813.2	9271.08	4.73111	3.34389	sig	SMC	98.5843
T7-75%RDF-FM3	111.682	112.803	149.315	373.8	124.6	RDFxMC	3	7378.77	2459.59	1.25515	3.34389	ns	MC3	145.517
T8-75%RDF-FM5	259.576	210.839	144.576	614.991	204.997	Error	14	27434.4	1959.6				MC5	188.578
Total	1059.48	1252.58	982.008	3294.06	137.253	Total	23	69793.9		t14=	2.14479		SE.m	18.0721
Mean	132.434	156.572	122.751			SE.m	25.5578						CD	54.8159
CF	452119					CD	77.5214
TSSQ	69793.9	RSSQ	4854.14			CV	32.2525
tSSQ	37505.4	ESSQ	27434.4
N UPTAKE IN GRAIN AT HARVEST (kg ha-1)
Treatments	R1	R2	R3	Total	Mean			ANOVA					Factors Mean
T1- 100%RDF-M0				0	0								1	0
T2- 100%RDF-SM				0	0		df	SS	MSS	Cal F	Table F		0.75	0
T3-100%RDF-FM3				0	0	Replication	2	0	0	#DIV/0!	3.73889	#DIV/0!	SE.m	0
T4-100%RDF-FM5				0	0	Treatment	7	0	0	#DIV/0!	2.7642	#DIV/0!	CD	0
T5- 75%RDF-M0				0	0	RDF	1	0	0	#DIV/0!	4.60011	#DIV/0!	MC0	0
T6- 75%RDF-SM				0	0	MC	3	0	0	#DIV/0!	3.34389	#DIV/0!	SMC	0
T7-75%RDF-FM3				0	0	RDFxMC	3	0	0	#DIV/0!	3.34389	#DIV/0!	MC3	0
T8-75%RDF-FM5				0	0	Error	14	0	0				MC5	0
Total	0	0	0	0	#DIV/0!	Total	23	0		t14=	2.14479		SE.m	0
Mean	0	0	0			SE.m	0						CD	0
CF	0					CD	0
TSSQ	0	RSSQ	0			CV	#DIV/0!
tSSQ	0	ESSQ	0
TOTAL N UPTAKE AT HARVEST (kg ha-1)
Treatments	R1	R2	R3	Total	Mean			ANOVA					Factors Mean
T1- 100%RDF-M0	123.62	167.721	146.78	438.121	146.04								1	147.071
T2- 100%RDF-SM	110.381	104.808	95.7596	310.949	103.65		df	SS	MSS	Cal F	Table F		0.75	127.435
T3-100%RDF-FM3	180.991	224.725	93.5838	499.3	166.433	Replication	2	4854.14	2427.07	1.23856	3.73889	ns	SE.m	12.7789
T4-100%RDF-FM5	196.261	182.318	137.899	516.478	172.159	Treatment	7	37505.4	5357.92	2.73419	2.7642	ns	CD	38.7607
T5- 75%RDF-M0	0	153.531	106.337	259.868	86.6225	RDF	1	2313.43	2313.43	1.18057	4.60011	ns	MC0	116.331
T6- 75%RDF-SM	76.9647	95.8343	107.758	280.557	93.519	MC	3	27813.2	9271.08	4.73111	3.34389	sig	SMC	98.5843
T7-75%RDF-FM3	111.682	112.803	149.315	373.8	124.6	RDFxMC	3	7378.77	2459.59	1.25515	3.34389	ns	MC3	145.517
T8-75%RDF-FM5	259.576	210.839	144.576	614.991	204.997	Error	14	27434.4	1959.6				MC5	188.578
Total	1059.48	1252.58	982.008	3294.06	137.253	Total	23	69793.9		t14=	2.14479		SE.m	18.0721
Mean	132.434	156.572	122.751			SE.m	25.5578						CD	54.8159
CF	452119					CD	77.5214
TSSQ	69793.9	RSSQ	4854.14			CV	32.2525
tSSQ	37505.4	ESSQ	27434.4
P UPTAKE AT 30 DAS (kg ha-1)
Treatments	R1	R2	R3	Total	Mean			ANOVA					Factors Mean
T1- 100%RDF-M0	3.98543	2.09646	2.05587	8.13776	2.71259								1	2.34909
T2- 100%RDF-SM	2.36872	1.84264	2.89631	7.10767	2.36922		df	SS	MSS	Cal F	Table F		0.75	1.9442
T3-100%RDF-FM3	2.58362	2.09345	2.56666	7.24372	2.41457	Replication	2	0.42108	0.21054	0.301685	3.73889	ns	SE.m	0.241157
T4-100%RDF-FM5	2.03793	2.04999	1.61205	5.69998	1.89999	Treatment	7	3.57083	0.510119	0.730955	2.7642	ns	CD	0.731474
T5- 75%RDF-M0	0	2.76305	1.58666	4.34971	1.4499	RDF	1	0.983636	0.983636	1.40946	4.60011	ns	MC0	2.08125
T6- 75%RDF-SM	2.55921	1.36345	1.47438	5.39704	1.79901	MC	3	0.124145	0.0413817	0.0592962	3.34389	ns	SMC	2.08412
T7-75%RDF-FM3	1.50007	3.1843	1.61445	6.29882	2.09961	RDFxMC	3	2.46305	0.821018	1.17645	3.34389	ns	MC3	2.25709
T8-75%RDF-FM5	2.643	2.7494	1.89242	7.28482	2.42827	Error	14	9.77033	0.69788				MC5	2.16413
Total	17.678	18.1427	15.6988	51.5195	2.14665	Total	23	13.7622		t14=	2.14479		SE.m	0.341048
Mean	2.20975	2.26784	1.96235			SE.m	0.482314						CD	1.03446
CF	110.594					CD	1.46295
TSSQ	13.7622	RSSQ	0.42108			CV	38.9162
tSSQ	3.57083	ESSQ	9.77033
P UPTAKE AT 60 DAS (kg ha-1)
Treatments	R1	R2	R3	Total	Mean			ANOVA					Factors Mean
T1- 100%RDF-M0	21.7499	27.7715	30.8175	80.3389	26.7796								1	27.696
T2- 100%RDF-SM	19.3676	27.1028	35.1793	81.6497	27.2166		df	SS	MSS	Cal F	Table F		0.75	22.5437
T3-100%RDF-FM3	18.6517	27.5808	29.7793	76.0118	25.3373	Replication	2	705.005	352.503	12.0997	3.73889	sig	SE.m	1.55813
T4-100%RDF-FM5	23.294	40.394	30.6631	94.3511	31.4504	Treatment	7	388.166	55.4523	1.9034	2.7642	ns	CD	4.7261
T5- 75%RDF-M0	0	26.6724	26.9999	53.6723	17.8908	RDF	1	159.273	159.273	5.46705	4.60011	sig	MC0	22.3352
T6- 75%RDF-SM	20.8166	19.1744	20.447	60.438	20.146	MC	3	169.055	56.3516	1.93427	3.34389	ns	SMC	23.6813
T7-75%RDF-FM3	15.6308	32.994	25.7205	74.3453	24.7818	RDFxMC	3	59.8383	19.9461	0.684651	3.34389	ns	MC3	25.0595
T8-75%RDF-FM5	20.1688	27.996	33.9043	82.069	27.3563	Error	14	407.865	29.1332				MC5	29.4034
Total	139.679	229.686	233.511	602.876	25.1198	Total	23	1501.04		t14=	2.14479		SE.m	2.20353
Mean	17.4599	28.7107	29.1889			SE.m	3.11626						CD	6.68371
CF	15144.1					CD	9.4522
TSSQ	1501.04	RSSQ	705.005			CV	21.4871
tSSQ	388.166	ESSQ	407.865
P UPTAKE AT 90 DAS (kg ha-1)
Treatments	R1	R2	R3	Total	Mean			ANOVA					Factors Mean
T1- 100%RDF-M0	58.3674	45.9998	46.3233	150.691	50.2302								1	59.0145
T2- 100%RDF-SM	61.088	54.588	59.4213	175.097	58.3658		df	SS	MSS	Cal F	Table F		0.75	58.2052
T3-100%RDF-FM3	76.5242	65.6762	55.0586	197.259	65.753	Replication	2	165.037	82.5185	0.249659	3.73889	ns	SE.m	5.24821
T4-100%RDF-FM5	65.3821	57.1566	62.588	185.127	61.7089	Treatment	7	1809.62	258.517	0.78214	2.7642	ns	CD	15.9188
T5- 75%RDF-M0	0	45.0979	80.4605	125.558	41.8528	RDF	1	3.92911	3.92911	0.0118875	4.60011	ns	MC0	46.0415
T6- 75%RDF-SM	63.4017	73.6026	55.588	192.592	64.1975	MC	3	1376.84	458.948	1.38854	3.34389	ns	SMC	61.2816
T7-75%RDF-FM3	41.6469	52.9998	72.7938	167.441	55.8135	RDFxMC	3	428.843	142.948	0.432487	3.34389	ns	MC3	60.7833
T8-75%RDF-FM5	72.9997	85.5193	54.3527	212.872	70.9572	Error	14	4627.34	330.525				MC5	66.3331
Total	439.41	480.64	486.586	1406.64	58.6099	Total	23	6602		t14=	2.14479		SE.m	7.42209
Mean	54.9263	60.08	60.8233			SE.m	10.4964						CD	22.5126
CF	82442.8					CD	31.8376
TSSQ	6602	RSSQ	165.037			CV	31.0192
tSSQ	1809.62	ESSQ	4627.34
P UPTAKE IN STRAW AT HARVEST (kg ha-1)
Treatments	R1	R2	R3	Total	Mean			ANOVA					Factors Mean
T1- 100%RDF-M0	82.5891	15.0474	24.611	122.248	40.7492								1	28.7485
T2- 100%RDF-SM	37.8448	19.5588	14.5666	71.9703	23.9901		df	SS	MSS	Cal F	Table F		0.75	18.5066
T3-100%RDF-FM3	26.4532	33.7932	18.2638	78.5102	26.1701	Replication	2	358.834	179.417	0.787942	3.73889	ns	SE.m	4.35606
T4-100%RDF-FM5	24.1988	26.7132	21.3416	72.2536	24.0845	Treatment	7	1329.58	189.94	0.834155	2.7642	ns	CD	13.2127
T5- 75%RDF-M0	0	23.6835	16.8788	40.5623	13.5208	RDF	1	629.377	629.377	2.76402	4.60011	ns	MC0	27.135
T6- 75%RDF-SM	20.361	11.4088	24.3521	56.122	18.7073	MC	3	109.506	36.502	0.160305	3.34389	ns	SMC	21.3487
T7-75%RDF-FM3	21.2727	14.7286	23.7007	59.702	19.9007	RDFxMC	3	590.696	196.899	0.864717	3.34389	ns	MC3	23.0354
T8-75%RDF-FM5	19.9674	24.5421	21.1832	65.6928	21.8976	Error	14	3187.85	227.703				MC5	22.9911
Total	232.687	169.476	164.898	567.061	23.6275	Total	23	4876.26		t14=	2.14479		SE.m	6.1604
Mean	29.0859	21.1845	20.6122			SE.m	8.71212						CD	18.6856
CF	13398.2					CD	26.4255
TSSQ	4876.26	RSSQ	358.834			CV	63.8655
tSSQ	1329.58	ESSQ	3187.85
P UPTAKE IN GRAIN AT HARVEST (kg ha-1)
Treatments	R1	R2	R3	Total	Mean			ANOVA					Factors Mean
T1- 100%RDF-M0				0	0								1	0
T2- 100%RDF-SM				0	0		df	SS	MSS	Cal F	Table F		0.75	0
T3-100%RDF-FM3				0	0	Replication	2	0	0	#DIV/0!	3.73889	#DIV/0!	SE.m	0
T4-100%RDF-FM5				0	0	Treatment	7	0	0	#DIV/0!	2.7642	#DIV/0!	CD	0
T5- 75%RDF-M0				0	0	RDF	1	0	0	#DIV/0!	4.60011	#DIV/0!	MC0	0
T6- 75%RDF-SM				0	0	MC	3	0	0	#DIV/0!	3.34389	#DIV/0!	SMC	0
T7-75%RDF-FM3				0	0	RDFxMC	3	0	0	#DIV/0!	3.34389	#DIV/0!	MC3	0
T8-75%RDF-FM5				0	0	Error	14	0	0				MC5	0
Total	0	0	0	0	#DIV/0!	Total	23	0		t14=	2.14479		SE.m	0
Mean	0	0	0			SE.m	0						CD	0
CF	0					CD	0
TSSQ	0	RSSQ	0			CV	#DIV/0!
tSSQ	0	ESSQ	0
TOTAL P UPTAKE AT HARVEST (kg ha-1)
Treatments	R1	R2	R3	Total	Mean			ANOVA					Factors Mean
T1- 100%RDF-M0	82.5891	15.0474	24.611	122.248	40.7492								1	28.7485
T2- 100%RDF-SM	37.8448	19.5588	14.5666	71.9703	23.9901		df	SS	MSS	Cal F	Table F		0.75	18.5066
T3-100%RDF-FM3	26.4532	33.7932	18.2638	78.5102	26.1701	Replication	2	358.834	179.417	0.787942	3.73889	ns	SE.m	4.35606
T4-100%RDF-FM5	24.1988	26.7132	21.3416	72.2536	24.0845	Treatment	7	1329.58	189.94	0.834155	2.7642	ns	CD	13.2127
T5- 75%RDF-M0	0	23.6835	16.8788	40.5623	13.5208	RDF	1	629.377	629.377	2.76402	4.60011	ns	MC0	27.135
T6- 75%RDF-SM	20.361	11.4088	24.3521	56.122	18.7073	MC	3	109.506	36.502	0.160305	3.34389	ns	SMC	21.3487
T7-75%RDF-FM3	21.2727	14.7286	23.7007	59.702	19.9007	RDFxMC	3	590.696	196.899	0.864717	3.34389	ns	MC3	23.0354
T8-75%RDF-FM5	19.9674	24.5421	21.1832	65.6928	21.8976	Error	14	3187.85	227.703				MC5	22.9911
Total	232.687	169.476	164.898	567.061	23.6275	Total	23	4876.26		t14=	2.14479		SE.m	6.1604
Mean	29.0859	21.1845	20.6122			SE.m	8.71212						CD	18.6856
CF	13398.2					CD	26.4255
TSSQ	4876.26	RSSQ	358.834			CV	63.8655
tSSQ	1329.58	ESSQ	3187.85
K UPTAKE AT 30 DAS (kg ha-1)
Treatments	R1	R2	R3	Total	Mean			ANOVA					Factors Mean
T1- 100%RDF-M0	19.1854	12.2472	9.92188	41.3545	13.7848								1	13.2861
T2- 100%RDF-SM	14.3877	13.8277	17.7886	46.004	15.3347		df	SS	MSS	Cal F	Table F		0.75	10.5652
T3-100%RDF-FM3	14.6212	6.9072	14.6826	36.211	12.0703	Replication	2	3.98639	1.9932	0.0950127	3.73889	ns	SE.m	1.32219
T4-100%RDF-FM5	10.3668	12.8124	12.6845	35.8638	11.9546	Treatment	7	83.8294	11.9756	0.57086	2.7642	ns	CD	4.01045
T5- 75%RDF-M0	0	14.8764	13.3132	28.1896	9.39654	RDF	1	44.4201	44.4201	2.11744	4.60011	ns	MC0	11.5907
T6- 75%RDF-SM	8.86026	7.2185	12.8065	28.8853	9.62843	MC	3	4.39762	1.46587	0.069876	3.34389	ns	SMC	12.4815
T7-75%RDF-FM3	11.7157	17.0597	8.17883	36.9542	12.3181	RDFxMC	3	35.0117	11.6706	0.556318	3.34389	ns	MC3	12.1942
T8-75%RDF-FM5	11.6707	12.4476	8.63492	32.7532	10.9177	Error	14	293.695	20.9782				MC5	11.4362
Total	90.8079	97.3966	98.011	286.216	11.9256	Total	23	381.511		t14=	2.14479		SE.m	1.86986
Mean	11.351	12.1746	12.2514			SE.m	2.64438						CD	5.67163
CF	3413.31					CD	8.02089
TSSQ	381.511	RSSQ	3.98639			CV	38.4063
tSSQ	83.8294	ESSQ	293.695
K UPTAKE AT 60 DAS (kg ha-1)
Treatments	R1	R2	R3	Total	Mean			ANOVA					Factors Mean
T1- 100%RDF-M0	93.2021	160.701	157.169	411.072	137.024								1	124.537
T2- 100%RDF-SM	75.5077	103.361	152.613	331.482	110.494		df	SS	MSS	Cal F	Table F		0.75	96.5126
T3-100%RDF-FM3	117.98	147.922	119.625	385.526	128.509	Replication	2	9094.25	4547.12	4.21052	3.73889	sig	SE.m	9.48659
T4-100%RDF-FM5	96.3596	144.533	125.465	366.358	122.119	Treatment	7	8345.04	1192.15	1.1039	2.7642	ns	CD	28.7746
T5- 75%RDF-M0	0	135.286	89.1221	224.408	74.8028	RDF	1	4712.05	4712.05	4.36323	4.60011	ns	MC0	105.913
T6- 75%RDF-SM	101.377	79.0466	114.852	295.276	98.4252	MC	3	794.527	264.842	0.245237	3.34389	ns	SMC	104.46
T7-75%RDF-FM3	89.362	99.9676	102.63	291.959	97.3197	RDFxMC	3	2838.47	946.155	0.876114	3.34389	ns	MC3	112.914
T8-75%RDF-FM5	97.6897	70.3411	178.477	346.508	115.503	Error	14	15119.2	1079.94				MC5	118.811
Total	671.478	941.158	1039.95	2652.59	110.525	Total	23	32558.5		t14=	2.14479		SE.m	13.4161
Mean	83.9347	117.645	129.994			SE.m	18.9732						CD	40.6934
CF	293176					CD	57.5492
TSSQ	32558.5	RSSQ	9094.25			CV	29.7332
tSSQ	8345.04	ESSQ	15119.2
K UPTAKE AT 90 DAS (kg ha-1)
Treatments	R1	R2	R3	Total	Mean			ANOVA					Factors Mean
T1- 100%RDF-M0	235.304	161.839	167.708	564.851	188.284								1	195.306
T2- 100%RDF-SM	191.284	199.133	209.696	600.113	200.038		df	SS	MSS	Cal F	Table F		0.75	197.152
T3-100%RDF-FM3	218.242	180.564	199.333	598.139	199.38	Replication	2	3439.61	1719.81	0.547276	3.73889	ns	SE.m	16.1825
T4-100%RDF-FM5	212.007	191.859	176.699	580.566	193.522	Treatment	7	14241.3	2034.47	0.64741	2.7642	ns	CD	49.0846
T5- 75%RDF-M0	0	207.613	218.852	426.465	142.155	RDF	1	20.4547	20.4547	0.0065091	4.60011	ns	MC0	165.219
T6- 75%RDF-SM	219.282	284.374	174.649	678.306	226.102	MC	3	8506.78	2835.59	0.902342	3.34389	ns	SMC	213.07
T7-75%RDF-FM3	174.639	186.319	224.729	585.688	195.229	RDFxMC	3	5714.08	1904.69	0.606111	3.34389	ns	MC3	197.304
T8-75%RDF-FM5	207.319	280.279	187.769	675.367	225.122	Error	14	43994.8	3142.48				MC5	209.322
Total	1458.08	1691.98	1559.44	4709.49	196.229	Total	23	61675.7		t14=	2.14479		SE.m	22.8855
Mean	182.26	211.497	194.929			SE.m	32.365						CD	69.4161
CF	924139					CD	98.1691
TSSQ	61675.7	RSSQ	3439.61			CV	28.5676
tSSQ	14241.3	ESSQ	43994.8
K UPTAKE IN STRAW AT HARVEST (kg ha-1)
Treatments	R1	R2	R3	Total	Mean			ANOVA					Factors Mean
T1- 100%RDF-M0	469.176	504.205	412.874	1386.26	462.085								1	386.591
T2- 100%RDF-SM	264.914	254.939	302.099	821.952	273.984		df	SS	MSS	Cal F	Table F		0.75	399.467
T3-100%RDF-FM3	160.767	575.329	400.197	1136.29	378.764	Replication	2	48340.5	24170.2	2.13273	3.73889	ns	SE.m	30.7314
T4-100%RDF-FM5	368.99	512.894	412.713	1294.6	431.532	Treatment	7	190716	27245.1	2.40405	2.7642	ns	CD	93.214
T5- 75%RDF-M0	0	354.017	368.726	722.743	240.914	RDF	1	994.599	994.599	0.0877611	4.60011	ns	MC0	351.5
T6- 75%RDF-SM	421.229	293.92	414.856	1130.01	376.668	MC	3	73836.4	24612.1	2.17172	3.34389	ns	SMC	325.326
T7-75%RDF-FM3	523.888	457.971	543.763	1525.62	508.541	RDFxMC	3	115885	38628.2	3.40847	3.34389	sig	MC3	443.653
T8-75%RDF-FM5	430.726	492.627	491.875	1415.23	471.743	Error	14	158662	11333				MC5	451.638
Total	2639.69	3445.9	3347.1	9432.7	393.029	Total	23	397718		t14=	2.14479		SE.m	43.4608
Mean	329.961	430.738	418.388			SE.m	61.4628						CD	131.825
CF	3.70732e+06					CD	186.428
TSSQ	397718	RSSQ	48340.5			CV	27.0862
tSSQ	190716	ESSQ	158662
K UPTAKE IN GRAIN AT HARVEST (kg ha-1)
Treatments	R1	R2	R3	Total	Mean			ANOVA					Factors Mean
T1- 100%RDF-M0				0	0								1	0
T2- 100%RDF-SM				0	0		df	SS	MSS	Cal F	Table F		0.75	0
T3-100%RDF-FM3				0	0	Replication	2	0	0	#DIV/0!	3.73889	#DIV/0!	SE.m	0
T4-100%RDF-FM5				0	0	Treatment	7	0	0	#DIV/0!	2.7642	#DIV/0!	CD	0
T5- 75%RDF-M0				0	0	RDF	1	0	0	#DIV/0!	4.60011	#DIV/0!	MC0	0
T6- 75%RDF-SM				0	0	MC	3	0	0	#DIV/0!	3.34389	#DIV/0!	SMC	0
T7-75%RDF-FM3				0	0	RDFxMC	3	0	0	#DIV/0!	3.34389	#DIV/0!	MC3	0
T8-75%RDF-FM5				0	0	Error	14	0	0				MC5	0
Total	0	0	0	0	#DIV/0!	Total	23	0		t14=	2.14479		SE.m	0
Mean	0	0	0			SE.m	0						CD	0
CF	0					CD	0
TSSQ	0	RSSQ	0			CV	#DIV/0!
tSSQ	0	ESSQ	0
TOTAL K UPTAKE AT HARVEST (kg ha-1)
Treatments	R1	R2	R3	Total	Mean			ANOVA					Factors Mean
T1- 100%RDF-M0	469.176	504.205	412.874	1386.26	462.085								1	386.591
T2- 100%RDF-SM	264.914	254.939	302.099	821.952	273.984		df	SS	MSS	Cal F	Table F		0.75	399.467
T3-100%RDF-FM3	160.767	575.329	400.197	1136.29	378.764	Replication	2	48340.5	24170.2	2.13273	3.73889	ns	SE.m	30.7314
T4-100%RDF-FM5	368.99	512.894	412.713	1294.6	431.532	Treatment	7	190716	27245.1	2.40405	2.7642	ns	CD	93.214
T5- 75%RDF-M0	0	354.017	368.726	722.743	240.914	RDF	1	994.599	994.599	0.0877611	4.60011	ns	MC0	351.5
T6- 75%RDF-SM	421.229	293.92	414.856	1130.01	376.668	MC	3	73836.4	24612.1	2.17172	3.34389	ns	SMC	325.326
T7-75%RDF-FM3	523.888	457.971	543.763	1525.62	508.541	RDFxMC	3	115885	38628.2	3.40847	3.34389	sig	MC3	443.653
T8-75%RDF-FM5	430.726	492.627	491.875	1415.23	471.743	Error	14	158662	11333				MC5	451.638
Total	2639.69	3445.9	3347.1	9432.7	393.029	Total	23	397718		t14=	2.14479		SE.m	43.4608
Mean	329.961	430.738	418.388			SE.m	61.4628						CD	131.825
CF	3.70732e+06					CD	186.428
TSSQ	397718	RSSQ	48340.5			CV	27.0862
tSSQ	190716	ESSQ	158662

## Sheet: Sheet2
		Cost of cultivation (Rs /ha) of rabi maize as influenced by different drip fertigation levels.
	S.NO.	Treatment	Land preparation	Seeds and sowing	Fertilizers cost	Cost of fertilizer application	Weed control	Plant protection	Harvesting, threshing,cleaning and packing	Transport	Cost of water (Rs. ha mm-1)	cost of irrigation	Cost of drip system	Total production cost	Grain yield yield (kg ha-1)	Income from Grain (Rs. ha-1)	Income from Straw (Rs. ha-1)	Total Gross Returns(Rs. ha-1)	Net Returns(Rs. ha-1)	B:C ratio
	1	T1- 100%RDF-M0	6000	4220	17686.2	1000	3900	3460	16000	3306.88	5412.9	1500	9600	70586	6613.76	94246	3500	97746	27160.1	1.38478
	2	T2- 100%RDF-SM	6000	4220	18186.2	1000	3900	3460	16000	3844.25	5412.9	1500	9600	71623.3	7688.49	109561	3500	113061	41437.7	1.57855
	3	T3-100%RDF-FM3	6000	4220	18186.2	1000	3900	3460	16000	3893.85	5412.9	1500	9600	71672.9	7787.7	110975	3500	114475	42801.8	1.59718
	4	T4-100%RDF-FM5	6000	4220	18186.2	1000	3900	3460	16000	4067.46	5412.9	1500	9600	71846.6	8134.92	115923	3500	119423	47576.1	1.66219
	5	T5- 75%RDF-M0	6000	4220	13264.8	1000	3900	3460	16000	3348.21	5412.9	1500	9600	64357.7	6696.43	95424.1	3500	98924.1	34566.4	1.5371
	6	T6- 75%RDF-SM	6000	4220	13764.8	1000	3900	3460	16000	3348.21	5412.9	1500	9600	64857.7	6696.43	95424.1	3500	98924.1	34066.4	1.52525
	7	T7-75%RDF-FM3	6000	4220	13764.8	1000	3900	3460	16000	3968.25	5412.9	1500	9600	64857.7	7936.51	113095	3500	116595	51737.5	1.79771
	8	T8-75%RDF-FM5	6000	4220	13764.8	1000	3900	3460	16000	4092.26	5412.9	1500	9600	64857.7	8184.52	116629	3500	120129	55271.8	1.8522

## Sheet: NO. OF GRAINS new
		2019
		No. of FILLED GRAINS
Main factors	2
Sub factors	9	Total factors	18
Replications	3
Treatments	R1	R2	R3	Total	Mean									Factors Mean
E1T1	48.5	30.9	54.5	133.9	44.6333				ANOVA					1	58.7667	1
E1T2	51.5	64.8	64.1	180.4	60.1333		df	SS	MSS	Cal F	Table F	Result		2	55.263	2
E1T3	63.5	64.1	65.6	193.2	64.4	Replication	2	3.42481	1.71241	0.0470375	3.2759	NS		SE.m	1.16118
E1T4	56.1	57.6	53.8	167.5	55.8333	Treatment	17	2515.13	147.949	4.06395	1.93321	S	Factor A	CD	3.33726
E1T5	64.2	63.5	62.9	190.6	63.5333	Factor A	1	165.725	165.725	4.55225	4.13002	S		1	42.6833	9	9
E1T6	65.2	67.2	69.8	202.2	67.4	Factor B	8	811178	101397	2785.24	2.22534	S		2	58.4667	5	5
E1T7	58.6	56.7	54.8	170.1	56.7	A*B	8	-808828	-101104	-2777.18	2.22534	NS		3	62.6	2	2
E1T8	62.5	63.9	61.2	187.6	62.5333	Error	34	1237.78	36.4052					4	54.2	7	7
E1T9	50.2	55.8	55.2	161.2	53.7333	Total	53	3756.33		t34=	2.03224			5	61.8333	3	3
E2T1	44.1	28.9	49.2	122.2	40.7333	SE.m	3.48354							6	65.7833	1	1
E2T2	55.8	63.1	51.5	170.4	56.8	CD	10.0118							7	55	6	6
E2T3	69.8	60.2	52.4	182.4	60.8	CV	10.5826							8	60.7333	4	4
E2T4	50.1	57.8	49.8	157.7	52.5667									9	51.8333	8	8
E2T5	62.8	66.8	50.8	180.4	60.1333									SE.m	2.46323
E2T6	61.8	69.8	60.9	192.5	64.1667								Factor B	CD	7.07941
E2T7	53.2	54.9	51.8	159.9	53.3
E2T8	59.8	61.2	55.8	176.8	58.9333
E2T9	51.1	42.9	55.8	149.8	49.9333
Total	1028.8	1030.1	1019.9	3078.8	57.0148
Mean	57.1556	57.2278	56.6611
CF	175537
TSSQ	3756.33	RSSQ	3.42481
tSSQ	2515.13	ESSQ	1237.78
		2020
		No. of FILLED GRAINS
Main factors	2
Sub factors	9	Total factors	18
Replications	3
Treatments	R1	R2	R3	Total	Mean									Factors Mean
E1T1	53.5	44.5	50.5	148.5	49.5				ANOVA					1	60.7259	1
E1T2	51.2	67.2	66.2	184.6	61.5333		df	SS	MSS	Cal F	Table F	Result		2	56.8704	2
E1T3	64.2	64.2	67.2	195.6	65.2	Replication	2	9.16926	4.58463	0.125934	3.2759	NS		SE.m	1.21705
E1T4	56.8	57.9	54.2	168.9	56.3	Treatment	17	2227.81	131.048	3.5997	1.93321	S	Factor A	CD	3.49783
E1T5	66.2	64.5	64.8	195.5	65.1667	Factor A	1	200.682	200.682	5.51245	4.13002	S		1	46.0667	9	9
E1T6	66.5	69.5	72.5	208.5	69.5	Factor B	8	856216	107027	2939.89	2.22534	S		2	59.8833	5	5
E1T7	59.2	59.8	55.7	174.7	58.2333	A*B	8	-854189	-106774	-2932.93	2.22534	NS		3	63.7167	2	2
E1T8	61.8	68.9	64.8	195.5	65.1667	Error	34	1359.75	39.9927					4	55.05	7	7
E1T9	51.2	50.8	65.8	167.8	55.9333	Total	53	3596.73		t34=	2.03224			5	63.1333	3	3
E2T1	46.7	30.5	50.7	127.9	42.6333	SE.m	3.65115							6	67.3833	1	1
E2T2	56.4	64.8	53.5	174.7	58.2333	CD	10.4935							7	56.4833	6	6
E2T3	70.4	62.5	53.8	186.7	62.2333	CV	10.7554							8	62.9167	4	4
E2T4	52.4	58.6	50.4	161.4	53.8									9	54.55	8	8
E2T5	63.4	67.5	52.4	183.3	61.1									SE.m	2.58175
E2T6	62.8	72.5	60.5	195.8	65.2667								Factor B	CD	7.42003
E2T7	54.8	55.8	53.6	164.2	54.7333
E2T8	60.4	67.1	54.5	182	60.6667
E2T9	58.1	41.8	59.6	159.5	53.1667
Total	1056	1068.4	1050.7	3175.1	58.7981
Mean	58.6667	59.3556	58.3722
CF	186690
TSSQ	3596.73	RSSQ	9.16926
tSSQ	2227.81	ESSQ	1359.75
		2019
		No. of Unfilled Grains
Main factors	2
Sub factors	9	Total factors	18
Replications	3
Treatments	R1	R2	R3	Total	Mean									Factors Mean
E1T1	30.8	28.8	27.5	87.1	29.0333				ANOVA					1	21.5241	2
E1T2	23.4	25.4	20.5	69.3	23.1		df	SS	MSS	Cal F	Table F	Result		2	24.8259	1
E1T3	19.1	18.5	18.4	56	18.6667	Replication	2	12.6369	6.31847	0.17356	3.2759	NS		SE.m	0.460354
E1T4	28.4	30.5	20.4	79.3	26.4333	Treatment	17	1945.56	114.445	3.14365	1.93321	S	Factor A	CD	1.32307
E1T5	19.8	19.4	18.6	57.8	19.2667	Factor A	1	147.18	147.18	4.04284	4.13002	NS		1	30.7167	1	1
E1T6	10.6	10.5	7.5	28.6	9.53333	Factor B	8	131131	16391.4	450.249	2.22534	S		2	23.9	5	5
E1T7	20.4	26.1	22.5	69	23	A*B	8	-129333	-16166.6	-444.074	2.22534	NS		3	20.1833	8	8
E1T8	15.5	16.8	20.25	52.55	17.5167	Error	34	194.548	5.722					4	27.4833	3	3
E1T9	30.5	27.5	23.5	81.5	27.1667	Total	53	2152.75		t34=	2.03224			5	20.25	7	7
E2T1	30.2	32.2	34.8	97.2	32.4	SE.m	1.38106							6	10.5	9	9
E2T2	20.5	24.5	29.1	74.1	24.7	CD	3.96921							7	24.0833	4	4
E2T3	23.6	21.7	19.8	65.1	21.7	CV	10.3218							8	23.175	6	6
E2T4	29.2	28.5	27.9	85.6	28.5333									9	28.2833	2	2
E2T5	21.1	22.8	19.8	63.7	21.2333									SE.m	0.976559
E2T6	11.4	10.5	12.5	34.4	11.4667								Factor B	CD	2.80666
E2T7	26.5	24.8	24.2	75.5	25.1667
E2T8	30.5	28.5	27.5	86.5	28.8333
E2T9	28.5	29.1	30.6	88.2	29.4
Total	420	426.1	405.35	1251.45	23.175
Mean	23.3333	23.6722	22.5194
CF	29002.4
TSSQ	2152.75	RSSQ	12.6369
tSSQ	1945.56	ESSQ	194.548
		2020
		No. of Unfilled Grains
Main factors	2
Sub factors	9	Total factors	18
Replications	3
Treatments	R1	R2	R3	Total	Mean									Factors Mean
E1T1	28.8	29.8	28.9	87.5	29.1667				ANOVA					1	20.3444	2
E1T2	20.8	28.1	16.5	65.4	21.8		df	SS	MSS	Cal F	Table F	Result		2	23.8296	1
E1T3	15.8	13.2	13.8	42.8	14.2667	Replication	2	25.7293	12.8646	0.353374	3.2759	NS		SE.m	0.504976
E1T4	27.8	27.8	18.9	74.5	24.8333	Treatment	17	2462.24	144.838	3.97849	1.93321	S	Factor A	CD	1.45132
E1T5	18.1	19.8	14.8	52.7	17.5667	Factor A	1	163.978	163.978	4.50425	4.13002	S		1	31.1167	1	1
E1T6	9.1	6	6.2	21.3	7.1	Factor B	8	122359	15294.8	420.128	2.22534	S		2	23.4667	5	5
E1T7	24.8	26.2	20.8	71.8	23.9333	A*B	8	-120060	-15007.6	-412.237	2.22534	NS		3	16.4333	8	8
E1T8	18.2	19.9	16.8	54.9	18.3	Error	34	234.091	6.88502					4	26.6833	3	3
E1T9	30.8	23.2	24.4	78.4	26.1333	Total	53	2722.06		t34=	2.03224			5	19.2	7	7
E2T1	32.2	32.2	34.8	99.2	33.0667	SE.m	1.51493							6	8.38333	9	9
E2T2	20.5	25.8	29.1	75.4	25.1333	CD	4.35395							7	25.7333	4	4
E2T3	18.8	17.8	19.2	55.8	18.6	CV	11.88							8	20	6	6
E2T4	29.2	28.5	27.9	85.6	28.5333									9	27.7667	2	2
E2T5	21.1	20.6	20.8	62.5	20.8333									SE.m	1.07122
E2T6	10.4	8.1	10.5	29	9.66667								Factor B	CD	3.0787
E2T7	27.5	28.9	26.2	82.6	27.5333
E2T8	23.6	21.7	19.8	65.1	21.7
E2T9	28.5	29.1	30.6	88.2	29.4
Total	406	406.7	380	1192.7	22.087
Mean	22.5556	22.5944	21.1111
CF	26343.2
TSSQ	2722.06	RSSQ	25.7293
tSSQ	2462.24	ESSQ	234.091
		2019
		Total grains
Main factors	2
Sub factors	9	Total factors	18
Replications	3
Treatments	R1	R2	R3	Total	Mean									Factors Mean
E1T1	79.3	59.7	82	221	73.6667				ANOVA					1	80.2907	1
E1T2	74.9	90.2	84.6	249.7	83.2333		df	SS	MSS	Cal F	Table F	Result		2	80.0889	2
E1T3	79	80.9	85.85	245.75	81.9167	Replication	2	29.0234	14.5117	0.398617	3.2759	NS		SE.m	1.28152
E1T4	84.5	88.1	74.2	246.8	82.2667	Treatment	17	733.972	43.1748	1.18595	1.93321	NS	Factor A	CD	3.68312
E1T5	83.3	82	81.3	246.6	82.2	Factor A	1	0.550046	0.550046	0.015109	4.13002	NS		1	73.4	9	9
E1T6	75.8	77.7	77.3	230.8	76.9333	Factor B	8	1.54741e+06	193426	5313.14	2.22534	S		2	82.3667	2	5
E1T7	79	82.8	77.3	239.1	79.7	A*B	8	-1.54667e+06	-193334	-5310.62	2.22534	NS		3	85.775	1	2
E1T8	82.3	83.3	79.8	245.4	81.8	Error	34	1507.62	44.3418					4	81.6833	4	7
E1T9	80.7	83.3	78.7	242.7	80.9	Total	53	2270.62		t34=	2.03224			5	81.7833	3	3
E2T1	74.3	61.1	84	219.4	73.1333	SE.m	3.84456							6	76.2833	8	1
E2T2	76.3	87.6	80.6	244.5	81.5	CD	11.0494							7	79.0833	7	6
E2T3	100.3	88.7	79.9	268.9	89.6333	CV	8.304							8	81.2167	5	4
E2T4	79.3	86.3	77.7	243.3	81.1									9	80.1167	6	8
E2T5	83.9	89.6	70.6	244.1	81.3667									SE.m	2.71851
E2T6	73.2	80.3	73.4	226.9	75.6333								Factor B	CD	7.81308
E2T7	79.7	79.7	76	235.4	78.4667
E2T8	83.4	82.9	75.6	241.9	80.6333
E2T9	79.6	72	86.4	238	79.3333
Total	1448.8	1456.2	1425.25	4330.25	80.1898
Mean	80.4889	80.9	79.1806
CF	347242
TSSQ	2270.62	RSSQ	29.0234
tSSQ	733.972	ESSQ	1507.62
		2020
		Total grains
Main factors	2
Sub factors	9	Total factors	18
Replications	3
Treatments	R1	R2	R3	Total	Mean									Factors Mean
E1T1	82.3	74.3	79.4	236	78.6667				ANOVA					1	81.0704	1
E1T2	72	95.3	82.7	250	83.3333		df	SS	MSS	Cal F	Table F	Result		2	80.7	2
E1T3	80	77.4	81	238.4	79.4667	Replication	2	57.827	28.9135	0.794215	3.2759	NS		SE.m	1.3376
E1T4	84.6	85.7	73.1	243.4	81.1333	Treatment	17	369.201	21.7177	0.596557	1.93321	NS	Factor A	CD	3.8443
E1T5	84.3	84.3	79.6	248.2	82.7333	Factor A	1	1.85185	1.85185	0.0508679	4.13002	NS		1	77.1833	8	9
E1T6	75.6	75.5	78.7	229.8	76.6	Factor B	8	1.56523e+06	195654	5374.35	2.22534	S		2	83.35	1	5
E1T7	84	86	76.5	246.5	82.1667	A*B	8	-1.56487e+06	-195608	-5373.09	2.22534	NS		3	80.15	7	2
E1T8	80	88.8	81.6	250.4	83.4667	Error	34	1642.46	48.3076					4	81.7333	6	7
E1T9	82	74	90.2	246.2	82.0667	Total	53	2069.49		t34=	2.03224			5	82.3333	3	3
E2T1	78.9	62.7	85.5	227.1	75.7	SE.m	4.0128							6	75.7667	9	1
E2T2	76.9	90.6	82.6	250.1	83.3667	CD	11.5329							7	82.2167	5	6
E2T3	89.2	80.3	73	242.5	80.8333	CV	8.59288							8	82.9167	2	4
E2T4	81.6	87.1	78.3	247	82.3333									9	82.3167	4	8
E2T5	84.5	88.1	73.2	245.8	81.9333									SE.m	2.83748
E2T6	73.2	80.6	71	224.8	74.9333								Factor B	CD	8.15499
E2T7	82.3	84.7	79.8	246.8	82.2667
E2T8	84	88.8	74.3	247.1	82.3667
E2T9	86.6	70.9	90.2	247.7	82.5667
Total	1462	1475.1	1430.7	4367.8	80.8852
Mean	81.2222	81.95	79.4833
CF	353290
TSSQ	2069.49	RSSQ	57.827
tSSQ	369.201	ESSQ	1642.46
		2019
		Test weight
Main factors	2
Sub factors	9	Total factors	18
Replications	3
Treatments	R1	R2	R3	Total	Mean									Factors Mean
E1T1	19.8	18.2	19	57	19				ANOVA					1	23.0259	1
E1T2	21.1	25.6	24.1	70.8	23.6		df	SS	MSS	Cal F	Table F	Result		2	22.223	2
E1T3	22.8	23.5	25.2	71.5	23.8333	Replication	2	0.752311	0.376156	0.0103325	3.2759	NS		SE.m	0.224103
E1T4	23.1	22.8	23.4	69.3	23.1	Treatment	17	147.302	8.66482	0.238011	1.93321	NS	Factor A	CD	0.644078
E1T5	22.8	23.9	21.5	68.2	22.7333	Factor A	1	8.70412	8.70412	0.23909	4.13002	NS		1	18.52	9	9
E1T6	24.9	24.5	25.1	74.5	24.8333	Factor B	8	123917	15489.6	425.478	2.22534	S		2	23.15	5	5
E1T7	23.2	22.5	24.6	70.3	23.4333	A*B	8	-123778	-15472.3	-425.002	2.22534	NS		3	23.3833	2	2
E1T8	23.5	23.6	23.1	70.2	23.4	Error	34	46.104	1.356					4	22.4333	7	7
E1T9	23.9	23.1	22.9	69.9	23.3	Total	53	194.158		t34=	2.03224			5	23.2333	3	3
E2T1	20.12	18.5	15.5	54.12	18.04	SE.m	0.672309							6	24.4667	1	1
E2T2	20.1	24.5	23.5	68.1	22.7	CD	1.93224							7	22.8333	6	6
E2T3	24.1	22.2	22.5	68.8	22.9333	CV	5.14697							8	23.1833	4	4
E2T4	22.2	21.6	21.5	65.3	21.7667									9	22.4167	8	8
E2T5	23.6	24.1	23.5	71.2	23.7333									SE.m	0.475394
E2T6	24.1	24.3	23.9	72.3	24.1								Factor B	CD	1.3663
E2T7	22.6	22.6	21.5	66.7	22.2333
E2T8	23.6	22.7	22.6	68.9	22.9667
E2T9	21.6	21.7	21.3	64.6	21.5333
Total	407.12	409.9	404.7	1221.72	22.6244
Mean	22.6178	22.7722	22.4833
CF	27640.7
TSSQ	194.158	RSSQ	0.752311
tSSQ	147.302	ESSQ	46.104
		2020
		Test weight
Main factors	2
Sub factors	9	Total factors	18
Replications	3
Treatments	R1	R2	R3	Total	Mean									Factors Mean
E1T1	20.3	21.2	19.5	61	20.3333				ANOVA					1	23.9	1
E1T2	22.5	24.3	25.6	72.4	24.1333		df	SS	MSS	Cal F	Table F	Result		2	23.2481	2
E1T3	25.2	24.2	25.8	75.2	25.0667	Replication	2	0.365926	0.182963	0.00502574	3.2759	NS		SE.m	0.232321
E1T4	24.8	23.5	24.2	72.5	24.1667	Treatment	17	114.81	6.75355	0.185511	1.93321	NS	Factor A	CD	0.667698
E1T5	23.5	24.8	23.5	71.8	23.9333	Factor A	1	5.7363	5.7363	0.157568	4.13002	NS		1	20.0833	9	9
E1T6	25.2	25.6	25.7	76.5	25.5	Factor B	8	134895	16861.9	463.173	2.22534	S		2	23.8667	5	5
E1T7	24.2	23.5	24.8	72.5	24.1667	A*B	8	-134786	-16848.3	-462.799	2.22534	NS		3	24.5333	2	2
E1T8	24.2	24.8	24.5	73.5	24.5	Error	34	49.5474	1.45728					4	23.4333	7	7
E1T9	24.3	21.8	23.8	69.9	23.3	Total	53	164.724		t34=	2.03224			5	24.3333	3	3
E2T1	22.2	19.8	17.5	59.5	19.8333	SE.m	0.696964							6	25.2333	1	1
E2T2	21.5	24.8	24.5	70.8	23.6	CD	2.00309							7	23.55	6	6
E2T3	24.5	24.1	23.4	72	24	CV	5.12078							8	24.2	4	4
E2T4	23.5	22.5	22.1	68.1	22.7									9	22.9333	8	8
E2T5	22.8	25.6	25.8	74.2	24.7333									SE.m	0.492828
E2T6	24.8	25.5	24.6	74.9	24.9667								Factor B	CD	1.4164
E2T7	23.5	22.5	22.8	68.8	22.9333
E2T8	24.8	23.5	23.4	71.7	23.9
E2T9	22.8	20.4	24.5	67.7	22.5667
Total	424.6	422.4	426	1273	23.5741
Mean	23.5889	23.4667	23.6667
CF	30009.8
TSSQ	164.724	RSSQ	0.365926
tSSQ	114.81	ESSQ	49.5474
		2019
		Panicle length
Main factors	2
Sub factors	9	Total factors	18
Replications	3
Treatments	R1	R2	R3	Total	Mean									Factors Mean
E1T1	19.8	18.2	19	57	19				ANOVA					1	23.0259	1
E1T2	21.1	25.6	24.1	70.8	23.6		df	SS	MSS	Cal F	Table F	Result		2	22.223	2
E1T3	22.8	23.5	25.2	71.5	23.8333	Replication	2	0.752311	0.376156	0.0103325	3.2759	NS		SE.m	0.224103
E1T4	23.1	22.8	23.4	69.3	23.1	Treatment	17	147.302	8.66482	0.238011	1.93321	NS	Factor A	CD	0.644078
E1T5	22.8	23.9	21.5	68.2	22.7333	Factor A	1	8.70412	8.70412	0.23909	4.13002	NS		1	18.52	9	9
E1T6	24.9	24.5	25.1	74.5	24.8333	Factor B	8	123917	15489.6	425.478	2.22534	S		2	23.15	5	5
E1T7	23.2	22.5	24.6	70.3	23.4333	A*B	8	-123778	-15472.3	-425.002	2.22534	NS		3	23.3833	2	2
E1T8	23.5	23.6	23.1	70.2	23.4	Error	34	46.104	1.356					4	22.4333	7	7
E1T9	23.9	23.1	22.9	69.9	23.3	Total	53	194.158		t34=	2.03224			5	23.2333	3	3
E2T1	20.12	18.5	15.5	54.12	18.04	SE.m	0.672309							6	24.4667	1	1
E2T2	20.1	24.5	23.5	68.1	22.7	CD	1.93224							7	22.8333	6	6
E2T3	24.1	22.2	22.5	68.8	22.9333	CV	5.14697							8	23.1833	4	4
E2T4	22.2	21.6	21.5	65.3	21.7667									9	22.4167	8	8
E2T5	23.6	24.1	23.5	71.2	23.7333									SE.m	0.475394
E2T6	24.1	24.3	23.9	72.3	24.1								Factor B	CD	1.3663
E2T7	22.6	22.6	21.5	66.7	22.2333
E2T8	23.6	22.7	22.6	68.9	22.9667
E2T9	21.6	21.7	21.3	64.6	21.5333
Total	407.12	409.9	404.7	1221.72	22.6244
Mean	22.6178	22.7722	22.4833
CF	27640.7
TSSQ	194.158	RSSQ	0.752311
tSSQ	147.302	ESSQ	46.104
		2020
		Test weight
Main factors	2
Sub factors	9	Total factors	18
Replications	3
Treatments	R1	R2	R3	Total	Mean									Factors Mean
E1T1	20.3	21.2	19.5	61	20.3333				ANOVA					1	23.9	1
E1T2	22.5	24.3	25.6	72.4	24.1333		df	SS	MSS	Cal F	Table F	Result		2	23.2481	2
E1T3	25.2	24.2	25.8	75.2	25.0667	Replication	2	0.365926	0.182963	0.00502574	3.2759	NS		SE.m	0.232321
E1T4	24.8	23.5	24.2	72.5	24.1667	Treatment	17	114.81	6.75355	0.185511	1.93321	NS	Factor A	CD	0.667698
E1T5	23.5	24.8	23.5	71.8	23.9333	Factor A	1	5.7363	5.7363	0.157568	4.13002	NS		1	20.0833	9	9
E1T6	25.2	25.6	25.7	76.5	25.5	Factor B	8	134895	16861.9	463.173	2.22534	S		2	23.8667	5	5
E1T7	24.2	23.5	24.8	72.5	24.1667	A*B	8	-134786	-16848.3	-462.799	2.22534	NS		3	24.5333	2	2
E1T8	24.2	24.8	24.5	73.5	24.5	Error	34	49.5474	1.45728					4	23.4333	7	7
E1T9	24.3	21.8	23.8	69.9	23.3	Total	53	164.724		t34=	2.03224			5	24.3333	3	3
E2T1	22.2	19.8	17.5	59.5	19.8333	SE.m	0.696964							6	25.2333	1	1
E2T2	21.5	24.8	24.5	70.8	23.6	CD	2.00309							7	23.55	6	6
E2T3	24.5	24.1	23.4	72	24	CV	5.12078							8	24.2	4	4
E2T4	23.5	22.5	22.1	68.1	22.7									9	22.9333	8	8
E2T5	22.8	25.6	25.8	74.2	24.7333									SE.m	0.492828
E2T6	24.8	25.5	24.6	74.9	24.9667								Factor B	CD	1.4164
E2T7	23.5	22.5	22.8	68.8	22.9333
E2T8	24.8	23.5	23.4	71.7	23.9
E2T9	22.8	20.4	24.5	67.7	22.5667
Total	424.6	422.4	426	1273	23.5741
Mean	23.5889	23.4667	23.6667
CF	30009.8
TSSQ	164.724	RSSQ	0.365926
tSSQ	114.81	ESSQ	49.5474

## Sheet: Grain Yield
		2019
		Grain yield
Main factors	2
Sub factors	9	Total factors	18
Replications	3
Treatments	R1	R2	R3	Total	Mean									Factors Mean
E1T1	26.5	23.6	21.56	71.66	23.8867				ANOVA					1	40.4304	1		Treatments	R1	R2	R3
E1T2	38.9	42.2	43.5	124.6	41.5333		df	SS	MSS	Cal F	Table F	Result		2	38.6926	2		E1T1	2650	2360	2156			Nutrient applied
E1T3	48.6	47.56	45.8	141.96	47.32	Replication	2	4.52828	2.26414	0.429317	3.2759	NS		SE.m	0.441958			E1T2	3890	4220	4350		N1	0			8.26667
E1T4	38.6	37.8	36.2	112.6	37.5333	Treatment	17	2902.3	170.724	32.372	1.93321	S	Factor A	CD	1.2702			E1T3	4860	4756	4580		N2	150
E1T5	45.8	47.6	44.5	137.9	45.9667	Factor A	1	40.7683	40.7683	7.73031	4.13002	S		1	22.7267	9	9	E1T4	3860	3780	3620		N3	187.5
E1T6	51.8	49.8	47.8	149.4	49.8	Factor B	8	401180	50147.5	9508.76	2.22534	S		2	39.55	5	5	E1T5	4580	4760	4450		N4	71.6
E1T7	40.2	39.5	38.9	118.6	39.5333	A*B	8	-398318	-49789.8	-9440.94	2.22534	NS		3	46.8933	2	2	E1T6	5180	4980	4780		N5	150
E1T8	43.5	42.5	41.9	127.9	42.6333	Error	34	179.31	5.27382					4	37.5167	7	7	E1T7	4020	3950	3890		N6	170
E1T9	36.5	35.7	34.8	107	35.6667	Total	53	3086.14		t34=	2.03224			5	43.75	3	3	E1T8	4350	4250	4190		N7	112.5
E2T1	26.5	15.6	22.6	64.7	21.5667	SE.m	1.32587							6	49.0333	1	1	E1T9	3650	3570	3480		N8	132.5
E2T2	38.5	36.4	37.8	112.7	37.5667	CD	3.8106				1.73778			7	38.5167	6	6	E2T1	2650	1560	2260		N9	20
E2T3	47.8	46.8	44.8	139.4	46.4667	CV	5.80484							8	42.3	4	4	E2T2	3850	3640	3780
E2T4	36.8	35.9	39.8	112.5	37.5									9	35.7667	8	8	E2T3	4780	4680	4480
E2T5	36.5	45.6	42.5	124.6	41.5333		Difference							SE.m	0.937534			E2T4	3680	3590	3980
E2T6	46.8	50.8	47.2	144.8	48.2667	1	2.32						Factor B	CD	2.6945			E2T5	3650	4560	4250
E2T7	37.9	37.8	36.8	112.5	37.5	2	3.96667											E2T6	4680	5080	4720
E2T8	40.9	41.8	43.2	125.9	41.9667	3	0.853333											E2T7	3790	3780	3680
E2T9	34.8	37.6	35.2	107.6	35.8667	4	0.0333333											E2T8	4090	4180	4320
Total	716.9	714.56	704.86	2136.32	39.5615	5	4.43333											E2T9	3480	3760	3520
Mean	39.8278	39.6978	39.1589			6	1.53333
CF	84516					7	2.03333
TSSQ	3086.14	RSSQ	4.52828			8	0.666667
tSSQ	2902.3	ESSQ	179.31			9	-0.2
		Straw yield
Main factors	2
Sub factors	9	Total factors	18
Replications	3
Treatments	R1	R2	R3	Total	Mean									Factors Mean
E1T1	37.4	36.8	40.8	115	38.3333				ANOVA					1	62.7148	1
E1T2	61.2	66.2	66.2	193.6	64.5333		df	SS	MSS	Cal F	Table F	Result		2	60.9667	2
E1T3	68.9	70.2	71.6	210.7	70.2333	Replication	2	3.71593	1.85796	0.352299	3.2759	NS		SE.m	0.517491
E1T4	61.6	59.5	64.5	185.6	61.8667	Treatment	17	4870.16	286.48	54.3211	1.93321	S	Factor A	CD	1.48728
E1T5	70.4	66.8	66.8	204	68	Factor A	1	41.2563	41.2563	7.82285	4.13002	S		1	37.2167	9	9
E1T6	71.2	77.1	67.6	215.9	71.9667	Factor B	8	956916	119615	22680.8	2.22534	S		2	63.6833	5	5
E1T7	63.5	60.8	64.6	188.9	62.9667	A*B	8	-952087	-119011	-22566.4	2.22534	NS		3	69.3167	2	2
E1T8	68.8	64.6	65.9	199.3	66.4333	Error	34	245.837	7.23051					4	61.1167	7	7
E1T9	59.9	61.6	58.8	180.3	60.1	Total	53	5119.71		t34=	2.03224			5	67.25	3	3
E2T1	35.7	33.2	39.4	108.3	36.1	SE.m	1.55247							6	71.2	1	1
E2T2	60.5	64.2	63.8	188.5	62.8333	CD	4.46185							7	62.1833	6	6
E2T3	69.8	64.6	70.8	205.2	68.4	CV	4.3482				1.74815			8	65.55	4	4
E2T4	58.9	59.1	63.1	181.1	60.3667					1.74815				9	59.05	8	8
E2T5	63.5	69.2	66.8	199.5	66.5		Difference							SE.m	1.09776
E2T6	71.6	73.2	66.5	211.3	70.4333	1	2.23333						Factor B	CD	3.155
E2T7	61.8	63.6	58.8	184.2	61.4	2	1.7	51.2	56.2	56.2
E2T8	62.2	65.6	66.2	194	64.6667	3	1.83333	58.9	60.2	61.6
E2T9	59.8	58.5	55.7	174	58	4	1.5	51.6	49.5	54.5
Total	1106.7	1114.8	1117.9	3339.4	61.8407	5	1.5	60.4	56.8	56.8
Mean	61.4833	61.9333	62.1056			6	1.53333	61.2	67.1	57.6
CF	206511					7	1.56667	53.5	50.8	54.6
TSSQ	5119.71	RSSQ	3.71593			8	1.76667	58.8	54.6	55.9
tSSQ	4870.16	ESSQ	245.837			9	2.1	49.9	51.6	48.8
								50.5	54.2	53.8
								59.8	54.6	60.8
		Biological yield						48.9	49.1	53.1
								53.5	59.2	56.8
Main factors	2							61.6	63.2	56.5
Sub factors	9	Total factors	18					51.8	53.6	48.8
Replications	3							52.2	55.6	56.2
Treatments	R1	R2	R3	Total	Mean			49.8	48.5	45.7				Factors Mean
E1T1	63.9	60.4	62.36	186.66	62.22				ANOVA					1	103.145	1
E1T2	100.1	108.4	109.7	318.2	106.067		df	SS	MSS	Cal F	Table F	Result		2	99.6593	2
E1T3	117.5	117.76	117.4	352.66	117.553	Replication	2	1.43413	0.717067	0.135967	3.2759	NS		SE.m	0.791239
E1T4	100.2	97.3	100.7	298.2	99.4	Treatment	17	15082	887.178	168.223	1.93321	S	Factor A	CD	2.27404
E1T5	116.2	114.4	111.3	341.9	113.967	Factor A	1	164.048	164.048	31.106	4.13002	S		1	59.9433	9	9
E1T6	123	126.9	115.4	365.3	121.767	Factor B	8	2.59587e+06	324484	61527.3	2.22534	S		2	103.233	5	5
E1T7	103.7	100.3	103.5	307.5	102.5	A*B	8	-2.58095e+06	-322619	-61173.7	2.22534	NS		3	116.21	2	2
E1T8	112.3	107.1	107.8	327.2	109.067	Error	34	574.723	16.9036					4	98.6333	7	7
E1T9	96.4	97.3	93.6	287.3	95.7667	Total	53	15658.2		t34=	2.03224			5	111	3	3
E2T1	62.2	48.8	62	173	57.6667	SE.m	2.37372							6	120.233	1	1
E2T2	99	100.6	101.6	301.2	100.4	CD	6.82213							7	100.7	6	6
E2T3	117.6	111.4	115.6	344.6	114.867	CV	4.05455							8	107.85	4	4
E2T4	95.7	95	102.9	293.6	97.8667									9	94.8167	8	8
E2T5	100	114.8	109.3	324.1	108.033									SE.m	1.67847
E2T6	118.4	124	113.7	356.1	118.7								Factor B	CD	4.82397
E2T7	99.7	101.4	95.6	296.7	98.9
E2T8	103.1	107.4	109.4	319.9	106.633
E2T9	94.6	96.1	90.9	281.6	93.8667
Total	1823.6	1829.36	1822.76	5475.72	101.402
Mean	101.311	101.631	101.264
CF	555250
TSSQ	15658.2	RSSQ	1.43413
tSSQ	15082	ESSQ	574.723
		Harvest Index
Main factors	2
Sub factors	9	Total factors	18
Replications	3
Treatments	R1	R2	R3	Total	Mean									Factors Mean
E1T1	41.471	39.0728	34.5734	115.117	38.3724				ANOVA					1	39.0807	1
E1T2	38.8611	38.9299	39.6536	117.445	39.1482		df	SS	MSS	Cal F	Table F	Result		2	38.6387	2
E1T3	41.3617	40.3872	39.0119	120.761	40.2536	Replication	2	7.15382	3.57691	0.678239	3.2759	NS		SE.m	0.352377
E1T4	38.523	38.8489	35.9484	113.32	37.7734	Treatment	17	78.2196	4.60115	0.872452	1.93321	NS	Factor A	CD	1.01274
E1T5	39.4148	41.6084	39.982	121.005	40.3351	Factor A	1	2.63692	2.63692	0.500003	4.13002	NS		1	37.6901	9	9
E1T6	42.1138	39.2435	41.4211	122.778	40.9262	Factor B	8	365393	45674.1	8660.53	2.22534	S		2	38.2869	5	5
E1T7	38.7657	39.3819	37.5845	115.732	38.5774	A*B	8	-365317	-45664.6	-8658.74	2.22534	NS		3	40.362	2	2
E1T8	38.7355	39.6825	38.8683	117.286	39.0954	Error	34	113.988	3.35259					4	38.0403	7	7
E1T9	37.8631	36.6906	37.1795	111.733	37.2444	Total	53	199.361		t34=	2.03224			5	39.3517	3	3
E2T1	42.6045	31.9672	36.4516	111.023	37.0078	SE.m	1.05713							6	40.7977	1	1
E2T2	38.8889	36.1829	37.2047	112.277	37.4255	CD	3.03823							7	38.253	6	6
E2T3	40.6463	42.0108	38.7543	121.411	40.4705	CV	4.71184							8	39.2274	4	4
E2T4	38.4535	37.7895	38.6783	114.921	38.3071									9	37.7282	8	8
E2T5	36.5	39.7213	38.8838	115.105	38.3684									SE.m	0.747505
E2T6	39.527	40.9677	41.5128	122.008	40.6692								Factor B	CD	2.14835
E2T7	38.014	37.2781	38.4937	113.786	37.9286
E2T8	39.6702	38.9199	39.4881	118.078	39.3594
E2T9	36.7865	39.1259	38.7239	114.636	38.2121
Total	708.201	697.809	692.414	2098.42	38.8597
Mean	39.3445	38.7672	38.4674
CF	81544.1
TSSQ	199.361	RSSQ	7.15382
tSSQ	78.2196	ESSQ	113.988
		2020
		Grain yield
Main factors	2
Sub factors	9	Total factors	18
Replications	3
Treatments	R1	R2	R3	Total	Mean									Factors Mean
E1T1	26.5	21.8	23.56	71.86	23.9533				ANOVA					1	41.2859	1	1
E1T2	39.56	43.6	44.5	127.66	42.5533		df	SS	MSS	Cal F	Table F	Result		2	39.6833	2	2
E1T3	49.5	48.6	46.5	144.6	48.2	Replication	2	4.76578	2.38289	0.451834	3.2759	NS		SE.m	0.490755
E1T4	39.6	38.9	36.8	115.3	38.4333	Treatment	17	2997.04	176.296	33.4286	1.93321	S	Factor A	CD	1.41044
E1T5	46.5	48.9	45.6	141	47	Factor A	1	34.6721	34.6721	6.57438	4.13002	S		1	23.51	9	9
E1T6	52.6	50.8	48.9	152.3	50.7667	Factor B	8	419984	52497.9	9954.45	2.22534	S		2	40.3433	5	5
E1T7	39.8	39.4	40.8	120	40	A*B	8	-417021	-52127.7	-9884.23	2.22534	NS		3	47.925	2	2
E1T8	44.6	43.8	42.8	131.2	43.7333	Error	34	221.091	6.50269					4	37.8167	7	7
E1T9	39.5	36.8	34.5	110.8	36.9333	Total	53	3222.9		t34=	2.03224			5	44.9167	3	3
E2T1	20.1	22.6	26.5	69.2	23.0667	SE.m	1.47226							6	50.1833	1	1
E2T2	39.8	35.1	39.5	114.4	38.1333	CD	4.23133							7	39.65	6	6
E2T3	48.95	49.5	44.5	142.95	47.65	CV	6.29878							8	43.4333	4	4
E2T4	38.4	37.8	35.4	111.6	37.2									9	36.5833	8	8
E2T5	37.5	47.5	43.5	128.5	42.8333									SE.m	1.04105
E2T6	47.5	53.5	47.8	148.8	49.6								Factor B	CD	2.992
E2T7	40.5	35.8	41.6	117.9	39.3
E2T8	41.5	42.6	45.3	129.4	43.1333
E2T9	35.6	38.6	34.5	108.7	36.2333
Total	728.01	735.6	722.56	2186.17	40.4846
Mean	40.445	40.8667	40.1422
CF	88506.3
TSSQ	3222.9	RSSQ	4.76578
tSSQ	2997.04	ESSQ	221.091
		Straw yield
Main factors	2
Sub factors	9	Total factors	18
Replications	3
Treatments	R1	R2	R3	Total	Mean									Factors Mean
E1T1	39.2	38.5	42.2	119.9	39.9667				ANOVA					1	63.7926	1	1
E1T2	65.5	64.1	66.5	196.1	65.3667		df	SS	MSS	Cal F	Table F	Result		2	62.0963	2	2
E1T3	69.2	71.8	73.8	214.8	71.6	Replication	2	1.77333	0.886667	0.168126	3.2759	NS		SE.m	0.646318
E1T4	61.9	60.9	63.9	186.7	62.2333	Treatment	17	4759.53	279.972	53.0872	1.93321	S	Factor A	CD	1.85754
E1T5	70.2	68.9	67.8	206.9	68.9667	Factor A	1	38.8452	38.8452	7.36566	4.13002	S		1	38.7167	9	9
E1T6	72.5	76.5	69.8	218.8	72.9333	Factor B	8	989096	123637	23443.5	2.22534	S		2	64.3833	5	5
E1T7	65.2	62.5	65.2	192.9	64.3	A*B	8	-984375	-123047	-23331.7	2.22534	NS		3	69.7667	2	2
E1T8	70.8	62.9	68.8	202.5	67.5	Error	34	383.473	11.2786					4	61.5333	7	7
E1T9	60.1	64.2	59.5	183.8	61.2667	Total	53	5144.77		t34=	2.03224			5	68.35	3	3
E2T1	36.5	35.5	40.4	112.4	37.4667	SE.m	1.93895							6	72.5333	1	1
E2T2	63.6	64.1	62.5	190.2	63.4	CD	5.57261							7	63.75	6	6
E2T3	71.5	62.5	69.8	203.8	67.9333	CV	5.33545							8	67.2167	4	4
E2T4	61.5	58.5	62.5	182.5	60.8333			E1T1						9	60.25	8	8
E2T5	63.6	71.7	67.9	203.2	67.7333			E1T2	55.5	54.1	56.5			SE.m	1.37105
E2T6	72.6	75.2	68.6	216.4	72.1333			E1T3	59.2	61.8	63.8		Factor B	CD	3.94043
E2T7	63.2	65.5	60.9	189.6	63.2			E1T4	51.9	50.9	53.9
E2T8	62.8	70.9	67.1	200.8	66.9333			E1T5	60.2	58.9	57.8
E2T9	66.5	59.8	51.4	177.7	59.2333			E1T6	62.5	66.5	59.8
Total	1136.4	1134	1128.6	3399	62.9444			E1T7	55.2	52.5	55.2
Mean	63.1333	63	62.7					E1T8	60.8	52.9	58.8
CF	213948							E1T9	50.1	54.2	49.5
TSSQ	5144.77	RSSQ	1.77333					E2T1
tSSQ	4759.53	ESSQ	383.473					E2T2	53.6	54.1	52.5
								E2T3	61.5	52.5	59.8
								E2T4	51.5	48.5	52.5
								E2T5	53.6	61.7	57.9
		Biological yield						E2T6	62.6	65.2	58.6
								E2T7	53.2	55.5	50.9
Main factors	2							E2T8	52.8	60.9	57.1
Sub factors	9	Total factors	18					E2T9	56.5	49.8	41.4
Replications	3
Treatments	R1	R2	R3	Total	Mean									Factors Mean
E1T1	65.7	60.3	65.76	191.76	63.92				ANOVA					1	105.079	1
E1T2	105.06	107.7	111	323.76	107.92		df	SS	MSS	Cal F	Table F	Result		2	101.78	2
E1T3	118.7	120.4	120.3	359.4	119.8	Replication	2	10.0469	5.02345	0.952525	3.2759	NS		SE.m	0.881524
E1T4	101.5	99.8	100.7	302	100.667	Treatment	17	15086	887.413	168.268	1.93321	S	Factor A	CD	2.53353
E1T5	116.7	117.8	113.4	347.9	115.967	Factor A	1	146.916	146.916	27.8576	4.13002	S		1	62.2267	9	9
E1T6	125.1	127.3	118.7	371.1	123.7	Factor B	8	2.69646e+06	337058	63911.5	2.22534	S		2	104.727	5	5
E1T7	105	101.9	106	312.9	104.3	A*B	8	-2.68152e+06	-335190	-63557.4	2.22534	NS		3	117.692	2	2
E1T8	115.4	106.7	111.6	333.7	111.233	Error	34	713.364	20.9813					4	99.35	7	7
E1T9	99.6	101	94	294.6	98.2	Total	53	15809.4		t34=	2.03224			5	113.267	3	3
E2T1	56.6	58.1	66.9	181.6	60.5333	SE.m	2.64457							6	122.717	1	1
E2T2	103.4	99.2	102	304.6	101.533	CD	7.60058							7	103.4	6	6
E2T3	120.45	112	114.3	346.75	115.583	CV	4.42867							8	110.65	4	4
E2T4	99.9	96.3	97.9	294.1	98.0333									9	96.8333	8	8
E2T5	101.1	119.2	111.4	331.7	110.567									SE.m	1.87
E2T6	120.1	128.7	116.4	365.2	121.733								Factor B	CD	5.37442
E2T7	103.7	101.3	102.5	307.5	102.5
E2T8	104.3	113.5	112.4	330.2	110.067
E2T9	102.1	98.4	85.9	286.4	95.4667
Total	1864.41	1869.6	1851.16	5585.17	103.429
Mean	103.578	103.867	102.842
CF	577669
TSSQ	15809.4	RSSQ	10.0469
tSSQ	15086	ESSQ	713.364
		Harvest Index
Main factors	2
Sub factors	9	Total factors	18
Replications	3
Treatments	R1	R2	R3	Total	Mean									Factors Mean
E1T1	40.3349	36.1526	35.8273	112.315	37.4382				ANOVA					1	39.1268	1
E1T2	37.6547	40.4828	40.0901	118.228	39.4092		df	SS	MSS	Cal F	Table F	Result		2	38.8622	2
E1T3	41.7018	40.3654	38.6534	120.721	40.2402	Replication	2	0.703536	0.351768	0.0667008	3.2759	NS		SE.m	0.357729
E1T4	39.0148	38.978	36.5442	114.537	38.179	Treatment	17	82.8068	4.87099	0.923617	1.93321	NS	Factor A	CD	1.02812
E1T5	39.8458	41.511	40.2116	121.568	40.5228	Factor A	1	0.945057	0.945057	0.179198	4.13002	NS		1	37.7228	9	9
E1T6	42.0464	39.9057	41.1963	123.148	41.0495	Factor B	8	368010	46001.3	8722.58	2.22534	S		2	38.4712	5	5
E1T7	37.9048	38.6654	38.4906	115.061	38.3536	A*B	8	-367928	-45991.1	-8720.63	2.22534	NS		3	40.7482	2	2
E1T8	38.6482	41.0497	38.3513	118.049	39.3497	Error	34	117.477	3.4552					4	38.0645	7	7
E1T9	39.6586	36.4356	36.7021	112.796	37.5988	Total	53	200.987		t34=	2.03224			5	39.593	3	3
E2T1	35.5124	38.8985	39.6114	114.022	38.0074	SE.m	1.07319							6	40.8889	1	1
E2T2	38.4913	35.3831	38.7255	112.6	37.5333	CD	3.08437							7	38.3403	6	6
E2T3	40.6393	44.1964	38.9326	123.768	41.2561	CV	4.76687							8	39.279	4	4
E2T4	38.4384	39.2523	36.1593	113.85	37.95									9	37.8425	8	8
E2T5	37.092	39.849	39.0485	115.989	38.6632									SE.m	0.758859
E2T6	39.5504	41.5695	41.0653	122.185	40.7284								Factor B	CD	2.18098
E2T7	39.055	35.3406	40.5854	114.981	38.327
E2T8	39.7891	37.533	40.3025	117.625	39.2082
E2T9	34.8678	39.2276	40.163	114.258	38.0861
Total	700.245	704.796	700.66	2105.7	38.9945
Mean	38.9025	39.1554	38.9256
CF	82110.7
TSSQ	200.987	RSSQ	0.703536
tSSQ	82.8068	ESSQ	117.477
