# Supplementary material for: Conservation tillage and fertiliser management strategies impact on basmati rice (Oryza sativa L): crop performance, crop water productivity, nutrient uptake and fertility status of the soil under rice-wheat cropping system
Source: PeerJ. 2023 Nov 1;11:e16271. doi: 10.7717/peerj.16271 (PMC10625351; doi:10.7717/peerj.16271)
Supplement: Supplemental Information 2 [file peerj-11-16271-s002.xlsx]

## Sheet: Dry mt. new
		2019
		Dry matter 30DAT
Main factors	2						4.89268
Sub factors	9	Total factors	18
Replications	3
Treatments	R1	R2	R3	Total	Mean									Factors Mean
E1T1	133.31	166.45	174.09	473.85	157.95				ANOVA					1	245.129	1
E1T2	236.06	253.39	267.08	756.53	252.177		df	SS	MSS	Cal F	Table F	Result		2	235.267	2
E1T3	249.08	269.06	303.48	821.62	273.873	Replication	2	14822	7410.99	45.2394	3.2759	S		SE.m	2.46319
E1T4	207.68	241.85	266.08	715.61	238.537	Treatment	17	57908.4	3406.38	20.7938	1.93321	S	Factor A	CD	7.07927
E1T5	262.39	267.35	276.08	805.82	268.607	Factor A	1	1312.76	1312.76	8.01358	4.13002	S		1	157.61	9	9
E1T6	246.48	282.06	313.18	841.72	280.573	Factor B	8	1.43016e+07	1.7877e+06	10912.8	2.22534	S		2	248.252	5	5
E1T7	213.39	231.06	264.08	708.53	236.177	A*B	8	-1.4245e+07	-1.78062e+06	-10869.6	2.22534	NS		3	265.768	2	2
E1T8	243.18	261.06	278.98	783.22	261.073	Error	34	5569.78	163.817					4	234.713	7	7
E1T9	223.34	236.15	252.08	711.57	237.19	Total	53	78300.2		t34=	2.03224			5	260.45	3	3
E2T1	125.65	131.58	214.58	471.81	157.27	SE.m	7.38956							6	273.14	1	1
E2T2	239.86	241.56	251.56	732.98	244.327	CD	21.2378							7	235.427	6	6
E2T3	215.85	264.58	292.56	772.99	257.663	CV	5.32856							8	254.537	4	4
E2T4	224.89	221.89	245.89	692.67	230.89									9	231.885	8	8
E2T5	238.41	257.89	260.58	756.88	252.293									SE.m	5.22521
E2T6	241.56	269.87	285.69	797.12	265.707		238.41	257.89	260.58				Factor B	CD	15.0174
E2T7	225.89	231.56	246.58	704.03	234.677
E2T8	225.68	252.48	265.84	744	248
E2T9	214.87	225.89	238.98	679.74	226.58
Total	3967.57	4305.73	4697.39	12970.7	240.198
Mean	220.421	239.207	260.966
CF	3.11553e+06
TSSQ	78300.2	RSSQ	14822
tSSQ	57908.4	ESSQ	5569.78
		60 DAT
Main factors	2
Sub factors	9	Total factors	18
Replications	3
Treatments	R1	R2	R3	Total	Mean									Factors Mean
E1T1	402.08	413.08	486.09	1301.25	433.75				ANOVA					1	603.796	1
E1T2	631.75	660.39	669.09	1961.23	653.743		df	SS	MSS	Cal F	Table F	Result		2	582.523	2
E1T3	663.09	668.39	679.4	2010.88	670.293	Replication	2	929.43	464.715	2.83679	3.2759	NS		SE.m	6.65102
E1T4	590.34	542.37	520.37	1653.08	551.027	Treatment	17	337031	19825.4	121.021	1.93321	S	Factor A	CD	19.1152
E1T5	655.39	662.08	668.39	1985.86	661.953	Factor A	1	6109.28	6109.28	37.2933	4.13002	S		1	430.665	9	9
E1T6	755.09	659.06	672.04	2086.19	695.397	Factor B	8	8.84067e+07	1.10508e+07	67458.4	2.22534	S		2	642.792	5	5
E1T7	611.07	599.09	469.09	1679.25	559.75	A*B	8	-8.80758e+07	-1.10095e+07	-67205.9	2.22534	NS		3	654.933	2	2
E1T8	655.04	660.39	669.09	1984.52	661.507	Error	34	40608.7	1194.37					4	541.133	7	7
E1T9	587.09	542.06	511.08	1640.23	546.743	Total	53	378569		t34=	2.03224			5	649.227	3	3
E2T1	396.58	403.59	482.57	1282.74	427.58	SE.m	19.953							6	686.972	1	1
E2T2	625.41	631.52	638.59	1895.52	631.84	CD	57.3456							7	553.55	6	6
E2T3	618.57	631.56	668.59	1918.72	639.573	CV	5.82637							8	644.693	4	4
E2T4	502.59	528.59	562.54	1593.72	531.24									9	534.47	8	8
E2T5	611.54	640.11	657.85	1909.5	636.5									SE.m	14.1089
E2T6	704.51	672.54	658.59	2035.64	678.547								Factor B	CD	40.5495
E2T7	543.21	545.87	552.97	1642.05	547.35
E2T8	605.48	625.58	652.58	1883.64	627.88
E2T9	501.42	508.59	556.58	1566.59	522.197
Total	10660.3	10594.9	10775.5	32030.6	593.159
Mean	592.236	588.603	598.639
CF	1.89993e+07
TSSQ	378569	RSSQ	929.43
tSSQ	337031	ESSQ	40608.7
		90 DAT
Main factors	2
Sub factors	9	Total factors	18
Replications	3
Treatments	R1	R2	R3	Total	Mean									Factors Mean
E1T1	515.86	607.84	796.58	1920.28	640.093				ANOVA					1	869.923	1
E1T2	889.69	806.59	978.59	2674.87	891.623		df	SS	MSS	Cal F	Table F	Result		2	830.793	2
E1T3	889.58	985.59	946.58	2821.75	940.583	Replication	2	91242.8	45621.4	278.49	3.2759	S		SE.m	13.1432
E1T4	786.59	823.45	926.54	2536.58	845.527	Treatment	17	470362	27668.4	168.898	1.93321	S	Factor A	CD	37.774
E1T5	886.59	996.25	900.26	2783.1	927.7	Factor A	1	20669.8	20669.8	126.176	4.13002	S		1	623.433	9	9
E1T6	859.62	995.56	1052.16	2907.34	969.113	Factor B	8	1.77942e+08	2.22428e+07	135778	2.22534	S		2	865.368	5	5
E1T7	803.26	916.56	832.56	2552.38	850.793	A*B	8	-1.77493e+08	-2.21866e+07	-135435	2.22534	NS		3	917.627	2	2
E1T8	914.56	913.56	942.57	2770.69	923.563	Error	34	158579	4664.09					4	823.682	7	7
E1T9	768.59	846.65	905.68	2520.92	840.307	Total	53	720184		t34=	2.03224			5	913.62	3	3
E2T1	525.48	559.56	735.28	1820.32	606.773	SE.m	39.4296							6	945.733	1	1
E2T2	765.98	952.68	798.68	2517.34	839.113	CD	113.322							7	838.987	6	6
E2T3	801.56	992.56	889.89	2684.01	894.67	CV	8.03122							8	908.533	4	4
E2T4	715.68	796.58	893.25	2405.51	801.837									9	816.238	8	8
E2T5	815.68	982.68	900.26	2698.62	899.54									SE.m	27.881
E2T6	901.26	945.68	920.12	2767.06	922.353								Factor B	CD	80.1307
E2T7	789.69	905.26	786.59	2481.54	827.18
E2T8	865.59	822.36	992.56	2680.51	893.503
E2T9	769.59	891.24	715.68	2376.51	792.17
Total	14264.9	15740.6	15913.8	45919.3	850.358
Mean	792.492	874.481	884.102
CF	3.90479e+07
TSSQ	720184	RSSQ	91242.8
tSSQ	470362	ESSQ	158579
		AT HARVEST
Main factors	2
Sub factors	9	Total factors	18
Replications	3
Treatments	R1	R2	R3	Total	Mean									Factors Mean
E1T1	597.76	699.75	883.08	2180.59	726.863				ANOVA					1	1005.96	1
E1T2	1056.45	999.02	1111.06	3166.53	1055.51		df	SS	MSS	Cal F	Table F	Result		2	958.419	2
E1T3	987.79	1038.08	1200.06	3225.93	1075.31	Replication	2	20805.4	10402.7	63.502	3.2759	S		SE.m	12.3994
E1T4	992.95	968.39	988.09	2949.43	983.143	Treatment	17	658648	38744	236.508	1.93321	S	Factor A	CD	35.6362
E1T5	1087.49	1067.39	1073.48	3228.36	1076.12	Factor A	1	30511.2	30511.2	186.252	4.13002	S		1	699.435	9	9
E1T6	1113.18	1086.08	1103.18	3302.44	1100.81	Factor B	8	2.37046e+08	2.96307e+07	180877	2.22534	S		2	1028.86	5	5
E1T7	993.19	1078.35	918.06	2989.6	996.533	A*B	8	-2.36418e+08	-2.95522e+07	-180398	2.22534	NS		3	1048.57	2	2
E1T8	1069.09	1053.39	1063.34	3185.82	1061.94	Error	34	141138	4151.12					4	967.072	7	7
E1T9	986.07	958.35	987.78	2932.2	977.4	Total	53	820591		t34=	2.03224			5	1048.07	3	3
E2T1	612.52	652.25	751.25	2016.02	672.007	SE.m	37.1982							6	1074.84	1	1
E2T2	921.54	961.25	1123.85	3006.64	1002.21	CD	106.909							7	976.43	6	6
E2T3	971.15	1013.18	1081.18	3065.51	1021.84	CV	6.55975							8	1044.5	4	4
E2T4	924.56	1001.58	926.86	2853	951									9	951.92	8	8
E2T5	989.56	1081.29	989.19	3060.04	1020.01									SE.m	26.3031
E2T6	1081.58	983.16	1081.85	3146.59	1048.86								Factor B	CD	75.5958
E2T7	1001.54	936.58	930.86	2868.98	956.327
E2T8	1101.86	930.16	1049.19	3081.21	1027.07
E2T9	951.15	911.59	916.58	2779.32	926.44
Total	17439.4	17419.8	18178.9	53038.2	982.189
Mean	968.857	967.769	1009.94
CF	5.20936e+07
TSSQ	820591	RSSQ	20805.4
tSSQ	658648	ESSQ	141138
		2020
		Dry matter 30DAT
Main factors	2
Sub factors	9	Total factors	18
Replications	3
Treatments	R1	R2	R3	Total	Mean									Factors Mean
E1T1	132.52	173.5	183.65	489.67	163.223				ANOVA					1	249.708	1	1
E1T2	244.64	261.89	271.66	778.19	259.397		df	SS	MSS	Cal F	Table F	Result		2	240.374	2	2
E1T3	270.81	279.56	290.56	840.93	280.31	Replication	2	8912.39	4456.2	27.2023	3.2759	S		SE.m	2.49801
E1T4	235.1	240.56	249.65	725.31	241.77	Treatment	17	60153.4	3538.44	21.5999	1.93321	S	Factor A	CD	7.17934
E1T5	268.69	272.65	282.25	823.59	274.53	Factor A	1	1176.28	1176.28	7.18045	4.13002	S		1	162.76	9	9
E1T6	243.6	287.89	317.8	849.29	283.097	Factor B	8	1.49155e+07	1.86444e+06	11381.2	2.22534	S		2	252.917	5	5
E1T7	236.66	237.89	244.69	719.24	239.747	A*B	8	-1.48565e+07	-1.85707e+06	-11336.2	2.22534	NS		3	272.335	2	2
E1T8	246.68	266.68	285.56	798.92	266.307	Error	34	5728.36	168.481					4	237.333	7	7
E1T9	232.65	239.65	244.68	716.98	238.993	Total	53	74794.2		t34=	2.03224			5	265.18	3	3
E2T1	122.56	158.65	205.68	486.89	162.297	SE.m	7.49402							6	281.517	1	1
E2T2	234.65	248.21	256.45	739.31	246.437	CD	21.538							7	238.952	6	6
E2T3	248.68	267.56	276.84	793.08	264.36	CV	5.29709							8	260.025	4	4
E2T4	228.56	228.78	241.35	698.69	232.897									9	234.35	8	8
E2T5	242.35	262.13	263.01	767.49	255.83									SE.m	5.29908
E2T6	241.58	272.45	325.78	839.81	279.937								Factor B	CD	15.2297
E2T7	228.31	234.54	251.62	714.47	238.157
E2T8	241.32	256.34	263.57	761.23	253.743
E2T9	224.56	229.15	235.41	689.12	229.707
Total	4123.92	4418.08	4690.21	13232.2	245.041
Mean	229.107	245.449	260.567
CF	3.24243e+06
TSSQ	74794.2	RSSQ	8912.39
tSSQ	60153.4	ESSQ	5728.36
		60 DAT
Main factors	2
Sub factors	9	Total factors	18
Replications	3
Treatments	R1	R2	R3	Total	Mean									Factors Mean
E1T1	420.15	450.24	540.26	1410.65	470.217				ANOVA					1	612.723	1	1
E1T2	641.58	648.59	694.58	1984.75	661.583		df	SS	MSS	Cal F	Table F	Result		2	587.882	2	2
E1T3	610.59	698.89	742.15	2051.63	683.877	Replication	2	42118.3	21059.2	128.553	3.2759	S		SE.m	7.25443
E1T4	527.85	546.25	587.98	1662.08	554.027	Treatment	17	336417	19789.2	120.801	1.93321	S	Factor A	CD	20.8494
E1T5	698.58	654.12	650.58	2003.28	667.76	Factor A	1	8330.34	8330.34	50.8515	4.13002	S		1	446.043	9	9
E1T6	625.68	685.45	778.59	2089.72	696.573	Factor B	8	9.05522e+07	1.1319e+07	69095.6	2.22534	S		2	647.46	5	5
E1T7	510.54	548.35	652.45	1711.34	570.447	A*B	8	-9.02242e+07	-1.1278e+07	-68845.2	2.22534	NS		3	666.825	2	2
E1T8	658.49	659.29	660.25	1978.03	659.343	Error	34	48311.4	1420.92					4	541.572	7	7
E1T9	506.89	543.55	601.59	1652.03	550.677	Total	53	426846		t34=	2.03224			5	664.962	3	3
E2T1	400.26	405.1	460.25	1265.61	421.87	SE.m	21.7633							6	688.827	1	1
E2T2	605.54	695.58	598.89	1900.01	633.337	CD	62.5483							7	556.128	6	6
E2T3	602.15	648.58	698.59	1949.32	649.773	CV	6.27936							8	652.292	4	4
E2T4	510.25	535.54	541.56	1587.35	529.117									9	538.612	8	8
E2T5	695.85	648.49	642.15	1986.49	662.163									SE.m	15.389
E2T6	615.48	651.87	775.89	2043.24	681.08								Factor B	CD	44.2283
E2T7	500.12	505.16	620.15	1625.43	541.81
E2T8	610.25	649.89	675.58	1935.72	645.24
E2T9	502.48	535.58	541.58	1579.64	526.547
Total	10242.7	10710.5	11463.1	32416.3	600.302
Mean	569.041	595.029	636.837
CF	1.94596e+07
TSSQ	426846	RSSQ	42118.3
tSSQ	336417	ESSQ	48311.4
		90 DAT
Main factors	2
Sub factors	9	Total factors	18
Replications	3
Treatments	R1	R2	R3	Total	Mean									Factors Mean
E1T1	559.85	610.25	799.59	1969.69	656.563				ANOVA					1	875.641	1
E1T2	958.86	895.68	841.58	2696.12	898.707		df	SS	MSS	Cal F	Table F	Result		2	834.16	2
E1T3	975.58	950.25	915.48	2841.31	947.103	Replication	2	97775.4	48887.7	298.429	3.2759	S		SE.m	13.5458
E1T4	738.59	825.44	970.15	2534.18	844.727	Treatment	17	480186	28246.2	172.426	1.93321	S	Factor A	CD	38.931
E1T5	895.68	940.15	985.87	2821.7	940.567	Factor A	1	23230	23230	141.805	4.13002	S		1	627.332	9	9
E1T6	910.68	994.56	998.58	2903.82	967.94	Factor B	8	1.7988e+08	2.2485e+07	137257	2.22534	S		2	869.35	5	5
E1T7	778.65	851.24	968.59	2598.48	866.16	A*B	8	-1.79423e+08	-2.24279e+07	-136908	2.22534	NS		3	929.232	2	2
E1T8	941.25	886.58	948.51	2776.34	925.447	Error	34	168443	4954.19					4	826.008	7	7
E1T9	781.58	920.56	798.54	2500.68	833.56	Total	53	746404		t34=	2.03224			5	922.428	3	3
E2T1	511.59	505.86	776.85	1794.3	598.1	SE.m	40.6374							6	947.037	1	1
E2T2	782.54	935.86	801.58	2519.98	839.993	CD	116.793							7	841.815	6	6
E2T3	962.54	835.86	935.68	2734.08	911.36	CV	8.23324							8	910.68	4	4
E2T4	728.86	752.86	940.15	2421.87	807.29									9	820.223	8	8
E2T5	805.75	935.54	971.58	2712.87	904.29									SE.m	28.735
E2T6	816.58	962.56	999.26	2778.4	926.133								Factor B	CD	82.5851
E2T7	742.15	824.57	885.69	2452.41	817.47
E2T8	852.87	908.29	926.58	2687.74	895.913
E2T9	741.58	785.56	893.52	2420.66	806.887
Total	14485.2	15321.7	16357.8	46164.6	854.901
Mean	804.732	851.204	908.766
CF	3.94662e+07
TSSQ	746404	RSSQ	97775.4
tSSQ	480186	ESSQ	168443
		AT HARVEST
Main factors	2
Sub factors	9	Total factors	18
Replications	3
Treatments	R1	R2	R3	Total	Mean									Factors Mean
E1T1	610.29	702.25	910.26	2222.8	740.933				ANOVA					1	1021.89	1
E1T2	1072.58	1021.56	1126.58	3220.72	1073.57		df	SS	MSS	Cal F	Table F	Result		2	967.098	2
E1T3	1005.86	1060.24	1216.58	3282.68	1094.23	Replication	2	23703.1	11851.6	72.3464	3.2759	S		SE.m	12.6776
E1T4	1007.58	985.58	1003.56	2996.72	998.907	Treatment	17	641249	37720.5	230.26	1.93321	S	Factor A	CD	36.4357
E1T5	1101.25	1081.56	1088.95	3271.76	1090.59	Factor A	1	40523	40523	247.367	4.13002	S		1	719.323	9	9
E1T6	1128.56	1100.25	1118.59	3347.4	1115.8	Factor B	8	2.42889e+08	3.03611e+07	185336	2.22534	S		2	1043.41	5	5
E1T7	1007.58	1094.58	940.25	3042.41	1014.14	A*B	8	-2.42288e+08	-3.02861e+07	-184877	2.22534	NS		3	1061.4	2	2
E1T8	1084.53	1067.58	1078.58	3230.69	1076.9	Error	34	147541	4339.46					4	977.855	7	7
E1T9	1000.23	972.25	1003.25	2975.73	991.91	Total	53	812493		t34=	2.03224			5	1058.48	3	3
E2T1	617.98	667.58	807.58	2093.14	697.713	SE.m	38.0327							6	1085.19	1	1
E2T2	937.58	972.58	1129.58	3039.74	1013.25	CD	109.307							7	988.335	6	6
E2T3	983.25	1018.25	1084.25	3085.75	1028.58	CV	6.62394							8	1054.8	4	4
E2T4	933.25	1006.58	930.58	2870.41	956.803									9	961.637	8	8
E2T5	992.25	1092.25	994.59	3079.09	1026.36									SE.m	26.8932
E2T6	1089.58	987.58	1086.58	3163.74	1054.58								Factor B	CD	77.2917
E2T7	1007.48	941.58	938.54	2887.6	962.533
E2T8	1105.25	938.58	1054.25	3098.08	1032.69
E2T9	955.25	917.26	921.58	2794.09	931.363
Total	17640.3	17628.1	18434.1	53702.5	994.492
Mean	980.018	979.338	1024.12
CF	5.34067e+07
TSSQ	812493	RSSQ	23703.1
tSSQ	641249	ESSQ	147541

## Sheet: log Dry mt. 
		log
		2019
		Dry matter 30DAT
Main factors	2						1.58774
Sub factors	9	Total factors	18
Replications	3
Treatments	R1	R2	R3	Total	Mean									Factors Mean
E1T1	4.89268	5.11469	5.15957	15.1669	5.05565				ANOVA					1	5.48665	1
E1T2	5.46409	5.53493	5.58755	16.5866	5.52885		df	SS	MSS	Cal F	Table F	Result		2	5.44565	2
E1T3	5.51777	5.59493	5.71532	16.828	5.60934	Replication	2	0.282667	0.141334	29.7412	3.2759	S		SE.m	0.0132667
E1T4	5.336	5.48832	5.5838	16.4081	5.46937	Treatment	17	1.4022	0.0824826	17.357	1.93321	S	Factor A	CD	0.0381288
E1T5	5.56983	5.58856	5.62069	16.7791	5.59303	Factor A	1	0.0226956	0.0226956	4.77589	4.13002	S		1	5.04146	9	9
E1T6	5.50728	5.64212	5.74678	16.8962	5.63206	Factor B	8	7186.11	898.264	189024	2.22534	S		2	5.51357	5	5
E1T7	5.36312	5.44268	5.57625	16.3821	5.46068	A*B	8	-7184.74	-898.092	-188988	2.22534	NS		3	5.57657	2	2
E1T8	5.4938	5.56475	5.63114	16.6897	5.56323	Error	34	0.161572	0.00475212					4	5.45513	7	7
E1T9	5.4087	5.46447	5.52975	16.4029	5.46764	Total	53	1.84644		t34=	2.03224			5	5.56142	3	3
E2T1	4.8335	4.87962	5.36868	15.0818	5.02727	SE.m	0.0398							6	5.60602	1	1
E2T2	5.48006	5.48712	5.52768	16.4949	5.49828	CD	0.114386							7	5.4591	6	6
E2T3	5.37458	5.57814	5.67867	16.6314	5.5438	CV	1.26114							8	5.53717	4	4
E2T4	5.41561	5.40218	5.50488	16.3227	5.44089									9	5.4449	8	8
E2T5	5.47399	5.55253	5.56291	16.5894	5.52981									SE.m	0.0281428
E2T6	5.48712	5.59794	5.65491	16.74	5.57999								Factor B	CD	0.0808833
E2T7	5.42005	5.44484	5.50769	16.3726	5.45752
E2T8	5.41912	5.53133	5.58289	16.5333	5.51111
E2T9	5.37003	5.42005	5.47638	16.2665	5.42215
Total	96.8273	98.3292	100.016	295.172	5.46615
Mean	5.3793	5.46273	5.55642
CF	1613.45
TSSQ	1.84644	RSSQ	0.282667
tSSQ	1.4022	ESSQ	0.161572
		60 DAT
Main factors	2
Sub factors	9	Total factors	18
Replications	3
Treatments	R1	R2	R3	Total	Mean									Factors Mean
E1T1	5.99665	6.02364	6.18639	18.2067	6.0689				ANOVA					1	6.39161	1
E1T2	6.44849	6.49283	6.50592	19.4472	6.48241		df	SS	MSS	Cal F	Table F	Result		2	6.35735	2
E1T3	6.49691	6.50487	6.52121	19.523	6.50766	Replication	2	0.00378969	0.00189485	0.398737	3.2759	NS		SE.m	0.0123449
E1T4	6.3807	6.29595	6.25454	18.9312	6.3104	Treatment	17	1.10571	0.0650416	13.6869	1.93321	S	Factor A	CD	0.0354797
E1T5	6.48523	6.49539	6.50487	19.4855	6.49516	Factor A	1	0.0158486	0.0158486	3.33507	4.13002	NS		1	6.06151	9	9
E1T6	6.62684	6.49081	6.51032	19.628	6.54266	Factor B	8	9794.68	1224.33	257640	2.22534	S		2	6.46551	5	5
E1T7	6.41521	6.39541	6.15079	18.9614	6.32047	A*B	8	-9793.59	-1224.2	-257611	2.22534	NS		3	6.48396	2	2
E1T8	6.4847	6.49283	6.50592	19.4834	6.49448	Error	34	0.139901	0.00411472					4	6.29227	7	7
E1T9	6.37518	6.29538	6.23653	18.9071	6.30236	Total	53	1.2494		t34=	2.03224			5	6.47535	3	3
E2T1	5.98288	6.0004	6.17913	18.1624	6.05413	SE.m	0.0370348							6	6.53111	1	1
E2T2	6.43841	6.44813	6.45926	19.3458	6.4486	CD	0.106439							7	6.31277	6	6
E2T3	6.42741	6.44819	6.50517	19.3808	6.46026	CV	1.0063							8	6.46818	4	4
E2T4	6.21977	6.27021	6.33246	18.8225	6.27415									9	6.27966	8	8
E2T5	6.41598	6.46164	6.48898	19.3666	6.45553									SE.m	0.0261875
E2T6	6.5575	6.51106	6.4901	19.5587	6.51956								Factor B	CD	0.0752637
E2T7	6.2975	6.30238	6.3153	18.9152	6.30506
E2T8	6.40602	6.43868	6.48093	19.3256	6.44188
E2T9	6.21744	6.23164	6.32181	18.7709	6.25697
Total	114.673	114.599	114.95	344.222	6.37448
Mean	6.37071	6.36664	6.38609
CF	2194.24
TSSQ	1.2494	RSSQ	0.00378969
tSSQ	1.10571	ESSQ	0.139901
		90 DAT
Main factors	2
Sub factors	9	Total factors	18
Replications	3
Treatments	R1	R2	R3	Total	Mean									Factors Mean
E1T1	6.24584	6.40991	6.68033	19.3361	6.44536				ANOVA					1	6.75854	1
E1T2	6.79087	6.69282	6.88611	20.3698	6.78993		df	SS	MSS	Cal F	Table F	Result		2	6.71162	2
E1T3	6.79075	6.89324	6.85286	20.5368	6.84562	Replication	2	0.140705	0.0703525	14.8045	3.2759	S		SE.m	0.0168458
E1T4	6.66771	6.7135	6.83146	20.2127	6.73756	Treatment	17	0.829975	0.0488221	10.2737	1.93321	S	Factor A	CD	0.0484153
E1T5	6.78738	6.904	6.80268	20.4941	6.83135	Factor A	1	0.0297167	0.0297167	6.25336	4.13002	S		1	6.4213	9	9
E1T6	6.75649	6.90331	6.9586	20.6184	6.8728	Factor B	8	10905.2	1363.15	286852	2.22534	S		2	6.75887	5	5
E1T7	6.68868	6.82063	6.72451	20.2338	6.7446	A*B	8	-10904.4	-1363.05	-286831	2.22534	NS		3	6.81913	2	2
E1T8	6.81844	6.81735	6.84861	20.4844	6.82813	Error	34	0.260511	0.0076621					4	6.71018	7	7
E1T9	6.64456	6.74129	6.80869	20.1945	6.73151	Total	53	1.23119		t34=	2.03224			5	6.81518	3	3
E2T1	6.26431	6.32715	6.60025	19.1917	6.39724	SE.m	0.0505375							6	6.84977	1	1
E2T2	6.64116	6.85928	6.68296	20.1834	6.7278	CD	0.145246							7	6.73023	6	6
E2T3	6.68656	6.90029	6.7911	20.3779	6.79265	CV	1.29966							8	6.81005	4	4
E2T4	6.57323	6.68033	6.79487	20.0484	6.68281									9	6.70104	8	8
E2T5	6.70402	6.89028	6.80268	20.397	6.799									SE.m	0.0357354
E2T6	6.80379	6.8519	6.8245	20.4802	6.82673								Factor B	CD	0.102704
E2T7	6.67164	6.80822	6.66771	20.1476	6.71586
E2T8	6.76341	6.71218	6.90029	20.3759	6.79196
E2T9	6.64586	6.79261	6.57323	20.0117	6.67057
Total	119.945	121.718	122.031	363.694	6.73508
Mean	6.66359	6.76213	6.77952
CF	2449.51
TSSQ	1.23119	RSSQ	0.140705
tSSQ	0.829975	ESSQ	0.260511
		AT HARVEST
Main factors	2
Sub factors	9	Total factors	18
Replications	3
Treatments	R1	R2	R3	Total	Mean									Factors Mean
E1T1	6.39319	6.55072	6.78342	19.7273	6.57578				ANOVA					1	6.90487	1
E1T2	6.96267	6.90677	7.01307	20.8825	6.96084		df	SS	MSS	Cal F	Table F	Result		2	6.8561	2
E1T3	6.89547	6.94513	7.09013	20.9307	6.97691	Replication	2	0.0267068	0.0133534	2.80999	3.2759	NS		SE.m	0.0138305
E1T4	6.90068	6.87563	6.89577	20.6721	6.8907	Treatment	17	0.89541	0.0526712	11.0837	1.93321	S	Factor A	CD	0.0397493
E1T5	6.99163	6.97297	6.97866	20.9433	6.98109	Factor A	1	0.0321125	0.0321125	6.75751	4.13002	S		1	6.54118	9	9
E1T6	7.01498	6.99033	7.00595	21.0113	7.00375	Factor B	8	11376.3	1422.04	299243	2.22534	S		2	6.93355	5	5
E1T7	6.90092	6.98319	6.82226	20.7064	6.90212	A*B	8	-11375.4	-1421.93	-299220	2.22534	NS		3	6.95264	3	2
E1T8	6.97456	6.95977	6.96917	20.9035	6.96783	Error	34	0.175598	0.00516465					4	6.87376	7	7
E1T9	6.89373	6.86521	6.89546	20.6544	6.8848	Total	53	1.09772		t34=	2.03224			5	6.95389	2	3
E2T1	6.41758	6.48043	6.62174	19.5197	6.50658	SE.m	0.0414916							6	6.97911	1	1
E2T2	6.82605	6.86823	7.02452	20.7188	6.90627	CD	0.119248							7	6.88234	6	6
E2T3	6.87848	6.92085	6.98581	20.7851	6.92838	CV	1.04448				0.048772			8	6.9499	4	4
E2T4	6.82932	6.90933	6.8318	20.5705	6.85682									9	6.85799	8	8
E2T5	6.89726	6.98591	6.89689	20.7801	6.92669									SE.m	0.029339
E2T6	6.98618	6.89077	6.98643	20.8634	6.95446								Factor B	CD	0.084321
E2T7	6.90929	6.84223	6.83611	20.5876	6.86255
E2T8	7.00475	6.83536	6.95577	20.7959	6.93196			11.9176	11.9804	12.1217
E2T9	6.85767	6.81519	6.82065	20.4935	6.83117			12.326	12.3682	12.5245
Total	123.534	123.598	124.414	371.546	6.88048			12.3785	12.4208	12.4858
Mean	6.86302	6.86656	6.91187					12.3293	12.4093	12.3318
CF	2556.42							12.3973	12.4859	12.3969
TSSQ	1.09772	RSSQ	0.0267068					12.4862	12.3908	12.4864
tSSQ	0.89541	ESSQ	0.175598					12.4093	12.3422	12.3361
								12.5048	12.3354	12.4558
								12.3577	12.3152	12.3206
		2020
		Dry matter 30DAT
Main factors	2
Sub factors	9	Total factors	18
Replications	3
Treatments	R1	R2	R3	Total	Mean									Factors Mean
E1T1	4.88673	5.15618	5.21303	15.2559	5.08531				ANOVA					1	5.50657	1	1
E1T2	5.49979	5.56792	5.60455	16.6723	5.55742		df	SS	MSS	Cal F	Table F	Result		2	5.46837	2	2
E1T3	5.60142	5.63322	5.67181	16.9064	5.63548	Replication	2	0.172713	0.0863565	18.1722	3.2759	S		SE.m	0.0129472
E1T4	5.46001	5.48297	5.52006	16.463	5.48768	Treatment	17	1.35389	0.0796404	16.7589	1.93321	S	Factor A	CD	0.0372106
E1T5	5.59356	5.60819	5.64279	16.8445	5.61485	Factor A	1	0.0197005	0.0197005	4.14562	4.13002	S		1	5.07626	9	9
E1T6	5.49553	5.66258	5.76142	16.9195	5.63984	Factor B	8	7245.13	905.641	190576	2.22534	S		2	5.53193	5	5
E1T7	5.46662	5.47181	5.49999	16.4384	5.47947	A*B	8	-7243.8	-905.474	-190541	2.22534	NS		3	5.6059	2	2
E1T8	5.50809	5.58605	5.65445	16.7486	5.58286	Error	34	0.153884	0.00452601					4	5.46897	7	7
E1T9	5.44954	5.47918	5.49995	16.4287	5.47622	Total	53	1.68048		t34=	2.03224			5	5.57933	3	3
E2T1	4.8086	5.0667	5.32632	15.2016	5.06721	SE.m	0.0388416							6	5.6334	1	1
E2T2	5.4581	5.51428	5.54693	16.5193	5.50643	CD	0.111632							7	5.47578	6	6
E2T3	5.51617	5.58934	5.62344	16.729	5.57632	CV	1.22599							8	5.55926	4	4
E2T4	5.4318	5.43276	5.48625	16.3508	5.45027									9	5.45642	8	8
E2T5	5.49038	5.56884	5.57219	16.6314	5.54381									SE.m	0.0274652
E2T6	5.4872	5.60746	5.78622	16.8809	5.62696								Factor B	CD	0.0789356
E2T7	5.4307	5.45763	5.52792	16.4163	5.47208
E2T8	5.48612	5.5465	5.57432	16.6069	5.53565
E2T9	5.41414	5.43438	5.46133	16.3098	5.43662
Total	97.4845	98.866	99.973	296.323	5.48747
Mean	5.41581	5.49255	5.55405
CF	1626.07
TSSQ	1.68048	RSSQ	0.172713
tSSQ	1.35389	ESSQ	0.153884
		60 DAT
Main factors	2
Sub factors	9	Total factors	18
Replications	3
Treatments	R1	R2	R3	Total	Mean									Factors Mean
E1T1	6.04061	6.10978	6.29205	18.4424	6.14748				ANOVA					1	6.40763	1	1
E1T2	6.46393	6.4748	6.54331	19.482	6.49401		df	SS	MSS	Cal F	Table F	Result		2	6.36389	2	2
E1T3	6.41443	6.54949	6.60955	19.5735	6.52449	Replication	2	0.122097	0.0610484	12.8466	3.2759	S		SE.m	0.0116786
E1T4	6.26881	6.30308	6.37669	18.9486	6.31619	Treatment	17	1.05837	0.0622572	13.1009	1.93321	S	Factor A	CD	0.0335645
E1T5	6.54905	6.48329	6.47786	19.5102	6.5034	Factor A	1	0.0258222	0.0258222	5.43383	4.13002	S		1	6.09508	9	9
E1T6	6.43884	6.53008	6.65748	19.6264	6.54213	Factor B	8	9830.31	1228.79	258577	2.22534	S		2	6.47133	5	5
E1T7	6.23547	6.30691	6.48073	19.0231	6.34104	A*B	8	-9829.28	-1228.66	-258550	2.22534	NS		3	6.49964	2	2
E1T8	6.48995	6.49116	6.49262	19.4737	6.49124	Error	34	0.125205	0.0036825					4	6.29354	7	7
E1T9	6.22829	6.29812	6.39958	18.926	6.30866	Total	53	1.30567		t34=	2.03224			5	6.49913	3	3
E2T1	5.99211	6.00413	6.13177	18.128	6.04267	SE.m	0.0350357							6	6.53044	1	1
E2T2	6.40612	6.54475	6.39508	19.3459	6.44865	CD	0.100694							7	6.31547	6	6
E2T3	6.40051	6.47479	6.54906	19.4244	6.47479	CV	0.950296							8	6.48	4	4
E2T4	6.2349	6.28328	6.29445	18.8126	6.27088									9	6.28723	8	8
E2T5	6.54513	6.47465	6.46482	19.4846	6.49487									SE.m	0.024774
E2T6	6.4224	6.47985	6.65401	19.5563	6.51875								Factor B	CD	0.0712011
E2T7	6.21485	6.22488	6.42996	18.8697	6.28989
E2T8	6.41387	6.4768	6.51557	19.4062	6.46875
E2T9	6.21956	6.28335	6.29449	18.7974	6.2658
Total	113.979	114.793	116.059	344.831	6.38576
Mean	6.33216	6.3774	6.44773
CF	2202.01
TSSQ	1.30567	RSSQ	0.122097
tSSQ	1.05837	ESSQ	0.125205
		90 DAT
Main factors	2
Sub factors	9	Total factors	18
Replications	3
Treatments	R1	R2	R3	Total	Mean									Factors Mean
E1T1	6.32767	6.41387	6.6841	19.4256	6.47521				ANOVA					1	6.76593	1
E1T2	6.86575	6.79758	6.73528	20.3986	6.79954		df	SS	MSS	Cal F	Table F	Result		2	6.71395	2
E1T3	6.88303	6.85673	6.81945	20.5592	6.85307	Replication	2	0.157419	0.0787097	16.5631	3.2759	S		SE.m	0.017495
E1T4	6.60474	6.71592	6.87745	20.1981	6.7327	Treatment	17	0.85849	0.0504994	10.6267	1.93321	S	Factor A	CD	0.0502812
E1T5	6.79758	6.84604	6.89352	20.5371	6.84572	Factor A	1	0.0364778	0.0364778	7.6761	4.13002	S		1	6.42411	9	9
E1T6	6.81419	6.9023	6.90633	20.6228	6.87428	Factor B	8	10920.8	1365.1	287261	2.22534	S		2	6.76487	5	5
E1T7	6.65756	6.74669	6.87584	20.2801	6.76003	A*B	8	-10920	-1365	-287240	2.22534	NS		3	6.83309	2	2
E1T8	6.84721	6.78737	6.85489	20.4895	6.82982	Error	34	0.280977	0.00826404					4	6.70992	7	7
E1T9	6.66132	6.82498	6.68279	20.1691	6.72303	Total	53	1.29689		t34=	2.03224			5	6.82483	3	3
E2T1	6.23752	6.22626	6.65525	19.119	6.37301	SE.m	0.052485							6	6.85076	1	1
E2T2	6.66255	6.84147	6.68658	20.1906	6.7302	CD	0.150843							7	6.73181	6	6
E2T3	6.86958	6.72846	6.84127	20.4393	6.8131	CV	1.34878							8	6.81352	4	4
E2T4	6.59148	6.62388	6.84604	20.0614	6.68713									9	6.70657	8	8
E2T5	6.69177	6.84112	6.87892	20.4118	6.80394									SE.m	0.0371125
E2T6	6.70512	6.8696	6.90702	20.4817	6.82725								Factor B	CD	0.106662
E2T7	6.60955	6.71486	6.78637	20.1108	6.70359
E2T8	6.74861	6.81156	6.8315	20.3917	6.79722
E2T9	6.60878	6.6664	6.79517	20.0703	6.69012
Total	120.184	121.215	122.558	363.957	6.73994
Mean	6.67689	6.73417	6.80877
CF	2453.05
TSSQ	1.29689	RSSQ	0.157419
tSSQ	0.85849	ESSQ	0.280977
		AT HARVEST
Main factors	2
Sub factors	9	Total factors	18
Replications	3
Treatments	R1	R2	R3	Total	Mean									Factors Mean
E1T1	6.41393	6.55429	6.81373	19.782	6.59398				ANOVA					1	6.92067	1
E1T2	6.97782	6.92909	7.02694	20.9339	6.97795		df	SS	MSS	Cal F	Table F	Result		2	6.86587	2
E1T3	6.9136	6.96625	7.1038	20.9836	6.99455	Replication	2	0.0303807	0.0151904	3.19655	3.2759	NS		SE.m	0.0142327
E1T4	6.91531	6.89323	6.91131	20.7198	6.90662	Treatment	17	0.840707	0.0494534	10.4066	1.93321	S	Factor A	CD	0.0409052
E1T5	7.0042	6.98616	6.99297	20.9833	6.99444	Factor A	1	0.0405462	0.0405462	8.53223	4.13002	S		1	6.56769	9	9
E1T6	7.0287	7.00329	7.01982	21.0518	7.01727	Factor B	8	11419.3	1427.42	300375	2.22534	S		2	6.94778	5	5
E1T7	6.91531	6.99813	6.84615	20.7596	6.91986	A*B	8	-11418.5	-1427.32	-300354	2.22534	NS		3	6.96483	2	2
E1T8	6.9889	6.97315	6.9834	20.9455	6.98182	Error	34	0.185959	0.00546938					4	6.88477	7	7
E1T9	6.90799	6.87961	6.911	20.6986	6.89953	Total	53	1.05705		t34=	2.03224			5	6.96361	3	3
E2T1	6.42646	6.50366	6.69404	19.6242	6.54139	SE.m	0.0426981							6	6.98857	1	1
E2T2	6.8433	6.87995	7.0296	20.7529	6.91762	CD	0.122716							7	6.89445	6	6
E2T3	6.89086	6.92584	6.98864	20.8053	6.93512	CV	1.07286							8	6.95971	4	4
E2T4	6.83867	6.91431	6.83581	20.5888	6.86293									9	6.86801	8	8
E2T5	6.89998	6.996	6.90233	20.7983	6.93277									SE.m	0.0301921
E2T6	6.99355	6.89526	6.99079	20.8796	6.95987								Factor B	CD	0.086773
E2T7	6.91521	6.84756	6.84433	20.6071	6.86903
E2T8	7.00783	6.84437	6.96058	20.8128	6.93759
E2T9	6.86197	6.82139	6.82609	20.5095	6.83648
Total	123.744	123.812	124.681	372.236	6.89327
Mean	6.87464	6.87842	6.92674
CF	2565.93
TSSQ	1.05705	RSSQ	0.0303807
tSSQ	0.840707	ESSQ	0.185959

## Sheet: LAI
		2020
		LAI 30DAT
Main factors	2
Sub factors	9	Total factors	18
Replications	3
Treatments	R1	R2	R3	Total	Mean									Factors Mean
E1T1	1.78	1.89	1.83	5.5	1.83333				ANOVA					1	2.27926	2
E1T2	2.22	2.19	2.26	6.67	2.22333		df	SS	MSS	Cal F	Table F	Result		2	2.30852	1
E1T3	2.52	2.68	2.58	7.78	2.59333	Replication	2	0.00703333	0.00351667	1.02632	3.2759	NS		SE.m	0.0112653
E1T4	2.12	2.16	2.14	6.42	2.14	Treatment	17	3.11555	0.183268	53.4858	1.93321	S	Factor A	CD	0.0323767
E1T5	2.48	2.56	2.48	7.52	2.50667	Factor A	1	0.0115574	0.0115574	3.37298	4.13002	NS		1	1.865	9	9
E1T6	2.66	2.57	2.72	7.95	2.65	Factor B	8	1303.78	162.973	47562.9	2.22534	S		2	2.25167	5	5
E1T7	2.14	2.18	2.16	6.48	2.16	A*B	8	-1300.68	-162.585	-47449.7	2.22534	NS		3	2.58833	2	2
E1T8	2.34	2.28	2.3	6.92	2.30667	Error	34	0.1165	0.00342647					4	2.15833	7	7
E1T9	2.12	2.14	2.04	6.3	2.1	Total	53	3.23908		t34=	2.03224			5	2.48333	3	3
E2T1	1.89	1.98	1.82	5.69	1.89667	SE.m	0.0337958							6	2.67333	1	1
E2T2	2.26	2.29	2.29	6.84	2.28	CD	0.0971301							7	2.17333	6	6
E2T3	2.68	2.51	2.56	7.75	2.58333	CV	2.55183							8	2.32667	4	4
E2T4	2.11	2.16	2.26	6.53	2.17667									9	2.125	8	8
E2T5	2.52	2.48	2.38	7.38	2.46									SE.m	0.0238972
E2T6	2.62	2.75	2.72	8.09	2.69667								Factor B	CD	0.0686814
E2T7	2.18	2.16	2.22	6.56	2.18667
E2T8	2.38	2.38	2.28	7.04	2.34667
E2T9	2.14	2.22	2.09	6.45	2.15
Total	41.16	41.58	41.13	123.87	2.29389
Mean	2.28667	2.31	2.285
CF	284.144
TSSQ	3.23908	RSSQ	0.00703333
tSSQ	3.11555	ESSQ	0.1165
		60 DAT
Main factors	2
Sub factors	9	Total factors	18
Replications	3
Treatments	R1	R2	R3	Total	Mean									Factors Mean
E1T1	3.18	3.22	3.14	9.54	3.18				ANOVA					1	3.53741	2
E1T2	3.51	3.58	3.48	10.57	3.52333		df	SS	MSS	Cal F	Table F	Result		2	3.58741	1
E1T3	3.78	3.79	3.84	11.41	3.80333	Replication	2	0.00551481	0.00275741	0.804737	3.2759	NS		SE.m	0.00864568
E1T4	3.38	3.42	3.36	10.16	3.38667	Treatment	17	2.60425	0.153191	44.7082	1.93321	S	Factor A	CD	0.0248479
E1T5	3.74	3.66	3.76	11.16	3.72	Factor A	1	0.03375	0.03375	9.84979	4.13002	S		1	3.195	9	9
E1T6	3.86	3.81	3.84	11.51	3.83667	Factor B	8	3098.48	387.309	113034	2.22534	S		2	3.55167	5	5
E1T7	3.41	3.36	3.46	10.23	3.41	A*B	8	-3095.9	-386.988	-112941	2.22534	NS		3	3.825	2	2
E1T8	3.64	3.52	3.67	10.83	3.61	Error	34	0.0686185	0.00201819					4	3.40167	7	7
E1T9	3.38	3.34	3.38	10.1	3.36667	Total	53	2.67839		t34=	2.03224			5	3.75	3	3
E2T1	3.2	3.25	3.18	9.63	3.21	SE.m	0.0259371							6	3.89	1	1
E2T2	3.56	3.58	3.6	10.74	3.58	CD	0.0745438							7	3.43	6	6
E2T3	3.86	3.8	3.88	11.54	3.84667	CV	1.26107							8	3.635	4	4
E2T4	3.38	3.41	3.46	10.25	3.41667									9	3.38333	8	8
E2T5	3.74	3.78	3.82	11.34	3.78									SE.m	0.0183403
E2T6	3.95	3.99	3.89	11.83	3.94333								Factor B	CD	0.0527104
E2T7	3.36	3.49	3.5	10.35	3.45
E2T8	3.68	3.62	3.68	10.98	3.66
E2T9	3.4	3.36	3.44	10.2	3.4
Total	64.01	63.98	64.38	192.37	3.56241
Mean	3.55611	3.55444	3.57667
CF	685.3
TSSQ	2.67839	RSSQ	0.00551481
tSSQ	2.60425	ESSQ	0.0686185
		90 DAT
Main factors	2
Sub factors	9	Total factors	18
Replications	3
Treatments	R1	R2	R3	Total	Mean									Factors Mean
E1T1	3.09	2.94	3.14	9.17	3.05667				ANOVA					1	3.44667	2
E1T2	3.38	3.45	3.46	10.29	3.43		df	SS	MSS	Cal F	Table F	Result		2	3.50222	1
E1T3	3.72	3.68	3.69	11.09	3.69667	Replication	2	0.00884444	0.00442222	1.29061	3.2759	NS		SE.m	0.0100555
E1T4	3.35	3.24	3.26	9.85	3.28333	Treatment	17	2.92987	0.172345	50.2981	1.93321	S	Factor A	CD	0.0288999
E1T5	3.68	3.58	3.69	10.95	3.65	Factor A	1	0.0416667	0.0416667	12.1602	4.13002	S		1	3.08167	9	9
E1T6	3.81	3.72	3.78	11.31	3.77	Factor B	8	2956.2	369.524	107844	2.22534	S		2	3.47333	5	5
E1T7	3.36	3.31	3.32	9.99	3.33	A*B	8	-2953.31	-369.163	-107739	2.22534	NS		3	3.73833	2	2
E1T8	3.53	3.51	3.59	10.63	3.54333	Error	34	0.0928222	0.00273007					4	3.30167	7	7
E1T9	3.26	3.28	3.24	9.78	3.26	Total	53	3.03153		t34=	2.03224			5	3.68167	3	3
E2T1	3.16	3.18	2.98	9.32	3.10667	SE.m	0.0301666							6	3.81167	1	1
E2T2	3.5	3.49	3.56	10.55	3.51667	CD	0.0866996							7	3.34167	6	6
E2T3	3.78	3.8	3.76	11.34	3.78	CV	1.50384							8	3.57167	4	4
E2T4	3.36	3.28	3.32	9.96	3.32									9	3.26833	8	8
E2T5	3.7	3.68	3.76	11.14	3.71333									SE.m	0.021331
E2T6	3.84	3.92	3.8	11.56	3.85333								Factor B	CD	0.0613058
E2T7	3.41	3.31	3.34	10.06	3.35333
E2T8	3.63	3.59	3.58	10.8	3.6
E2T9	3.24	3.28	3.31	9.83	3.27667
Total	62.8	62.24	62.58	187.62	3.47444
Mean	3.48889	3.45778	3.47667
CF	651.875
TSSQ	3.03153	RSSQ	0.00884444
tSSQ	2.92987	ESSQ	0.0928222
		2019
		LAI 30DAT
Main factors	2
Sub factors	9	Total factors	18
Replications	3
Treatments	R1	R2	R3	Total	Mean									Factors Mean
E1T1	1.74	1.88	1.8	5.42	1.80667				ANOVA					1	2.25185	2	1
E1T2	2.1	2.17	2.25	6.52	2.17333		df	SS	MSS	Cal F	Table F	Result		2	2.29074	1	2
E1T3	2.44	2.64	2.52	7.6	2.53333	Replication	2	0.00458148	0.00229074	0.668542	3.2759	NS		SE.m	0.00962355
E1T4	2.09	2.15	2.1	6.34	2.11333	Treatment	17	3.12101	0.183589	53.5796	1.93321	S	Factor A	CD	0.0276584
E1T5	2.45	2.54	2.46	7.45	2.48333	Factor A	1	0.0204167	0.0204167	5.95851	4.13002	S		1	1.83333	9	9
E1T6	2.64	2.55	2.69	7.88	2.62667	Factor B	8	1277	159.625	46585.8	2.22534	S		2	2.21333	5	5
E1T7	2.1	2.16	2.15	6.41	2.13667	A*B	8	-1273.9	-159.237	-46472.7	2.22534	NS		3	2.54667	2	2
E1T8	2.3	2.31	2.29	6.9	2.3	Error	34	0.0850185	0.00250054					4	2.13333	7	7
E1T9	2.08	2.11	2.09	6.28	2.09333	Total	53	3.21061		t34=	2.03224			5	2.46667	3	3
E2T1	1.91	1.82	1.85	5.58	1.86	SE.m	0.0288707							6	2.655	1	1
E2T2	2.28	2.26	2.22	6.76	2.25333	CD	0.0829751							7	2.15667	6	6
E2T3	2.61	2.48	2.59	7.68	2.56	CV	2.20163							8	2.32	4	4
E2T4	2.15	2.18	2.13	6.46	2.15333									9	2.11667	8	8
E2T5	2.44	2.45	2.46	7.35	2.45									SE.m	0.0204146
E2T6	2.71	2.66	2.68	8.05	2.68333								Factor B	CD	0.0586722
E2T7	2.16	2.15	2.22	6.53	2.17667
E2T8	2.3	2.4	2.32	7.02	2.34
E2T9	2.15	2.11	2.16	6.42	2.14
Total	40.65	41.02	40.98	122.65	2.2713
Mean	2.25833	2.27889	2.27667
CF	278.574
TSSQ	3.21061	RSSQ	0.00458148
tSSQ	3.12101	ESSQ	0.0850185
		60 DAT
Main factors	2
Sub factors	9	Total factors	18
Replications	3
Treatments	R1	R2	R3	Total	Mean									Factors Mean
E1T1	3.14	3.19	3.16	9.49	3.16333				ANOVA					1	3.51963	2	1
E1T2	3.48	3.57	3.46	10.51	3.50333		df	SS	MSS	Cal F	Table F	Result		2	3.5763	1	2
E1T3	3.76	3.77	3.83	11.36	3.78667	Replication	2	0.0038037	0.00190185	0.555047	3.2759	NS		SE.m	0.00778685
E1T4	3.38	3.39	3.35	10.12	3.37333	Treatment	17	2.59261	0.152506	44.5083	1.93321	S	Factor A	CD	0.0223796
E1T5	3.71	3.64	3.75	11.1	3.7	Factor A	1	0.04335	0.04335	12.6515	4.13002	S		1	3.18333	9	9
E1T6	3.85	3.79	3.82	11.46	3.82	Factor B	8	3073.31	384.164	112117	2.22534	S		2	3.535	5	5
E1T7	3.38	3.37	3.44	10.19	3.39667	A*B	8	-3070.77	-383.846	-112024	2.22534	NS		3	3.81167	2	2
E1T8	3.62	3.49	3.64	10.75	3.58333	Error	34	0.055663	0.00163715					4	3.38667	7	7
E1T9	3.36	3.32	3.37	10.05	3.35	Total	53	2.65208		t34=	2.03224			5	3.73333	3	3
E2T1	3.24	3.22	3.15	9.61	3.20333	SE.m	0.0233606							6	3.87667	1	1
E2T2	3.54	3.59	3.57	10.7	3.56667	CD	0.0671389							7	3.42	6	6
E2T3	3.84	3.79	3.88	11.51	3.83667	CV	1.14042							8	3.615	4	4
E2T4	3.41	3.38	3.41	10.2	3.4									9	3.37	8	8
E2T5	3.76	3.75	3.79	11.3	3.76667									SE.m	0.0165184
E2T6	3.94	3.97	3.89	11.8	3.93333								Factor B	CD	0.0474744
E2T7	3.39	3.46	3.48	10.33	3.44333
E2T8	3.68	3.61	3.65	10.94	3.64667
E2T9	3.38	3.38	3.41	10.17	3.39
Total	63.86	63.68	64.05	191.59	3.54796
Mean	3.54778	3.53778	3.55833
CF	679.754
TSSQ	2.65208	RSSQ	0.0038037
tSSQ	2.59261	ESSQ	0.055663
		90 DAT
Main factors	2
Sub factors	9	Total factors	18
Replications	3
Treatments	R1	R2	R3	Total	Mean									Factors Mean
E1T1	3.07	2.94	3.11	9.12	3.04				ANOVA					1	3.4163	2
E1T2	3.32	3.41	3.42	10.15	3.38333		df	SS	MSS	Cal F	Table F	Result		2	3.48815	1
E1T3	3.69	3.65	3.66	11	3.66667	Replication	2	0.0169	0.00845	2.46609	3.2759	NS		SE.m	0.0112749
E1T4	3.31	3.22	3.19	9.72	3.24	Treatment	17	2.91733	0.171608	50.083	1.93321	S	Factor A	CD	0.0324045
E1T5	3.65	3.54	3.66	10.85	3.61667	Factor A	1	0.0696963	0.0696963	20.3405	4.13002	S		1	3.07	9	9
E1T6	3.79	3.69	3.75	11.23	3.74333	Factor B	8	2918.93	364.867	106485	2.22534	S		2	3.44333	5	5
E1T7	3.35	3.29	3.31	9.95	3.31667	A*B	8	-2916.08	-364.511	-106381	2.22534	NS		3	3.71833	2	2
E1T8	3.51	3.49	3.54	10.54	3.51333	Error	34	0.1167	0.00343235					4	3.27167	7	7
E1T9	3.21	3.25	3.22	9.68	3.22667	Total	53	3.05093		t34=	2.03224			5	3.65667	3	3
E2T1	3.19	3.17	2.94	9.3	3.1	SE.m	0.0338248							6	3.79	1	1
E2T2	3.51	3.42	3.58	10.51	3.50333	CD	0.0972134							7	3.32833	6	6
E2T3	3.78	3.81	3.72	11.31	3.77	CV	1.69706							8	3.54667	4	4
E2T4	3.35	3.26	3.3	9.91	3.30333									9	3.245	8	8
E2T5	3.73	3.64	3.72	11.09	3.69667									SE.m	0.0239178
E2T6	3.84	3.88	3.79	11.51	3.83667								Factor B	CD	0.0687403
E2T7	3.41	3.28	3.33	10.02	3.34
E2T8	3.61	3.55	3.58	10.74	3.58
E2T9	3.21	3.26	3.32	9.79	3.26333
Total	62.53	61.75	62.14	186.42	3.45222
Mean	3.47389	3.43056	3.45222
CF	643.563
TSSQ	3.05093	RSSQ	0.0169
tSSQ	2.91733	ESSQ	0.1167

## Sheet: CGR
		2019
		CGR 30DAT
Main factors	2
Sub factors	9	Total factors	18
Replications	3
Treatments	R1	R2	R3	Total	Mean									Factors Mean
E2T1	8.959	8.221	10.4	27.58	9.19333				ANOVA					2	11.9556	1
E2T2	13.1897	13.5667	13.4003	40.1567	13.3856		df	SS	MSS	Cal F	Table F	Result		1	11.5752	2
E2T3	13.8003	13.311	12.5307	39.642	13.214	Replication	2	12.0386	6.01932	3.8223	3.2759	S		SE.m	0.241507
E2T4	12.7553	10.0173	8.47633	31.249	10.4163	Treatment	17	147.104	8.65319	5.49482	1.93321	S	Factor A	CD	0.694097
E2T5	13.1	13.1577	13.077	39.3347	13.1116	Factor A	1	1.95346	1.95346	1.24045	4.13002	NS		1	9.10183	9	9
E2T6	16.9537	12.5667	11.962	41.4823	13.8274	Factor B	8	35191.2	4398.89	2793.32	2.22534	S		2	13.1513	2	5
E2T7	13.256	12.2677	6.83367	32.3573	10.7858	A*B	8	-35046	-4380.75	-2781.8	2.22534	NS		3	12.9722	4	2
E2T8	13.7287	13.311	13.0037	40.0433	13.3478	Error	34	53.5429	1.57479					4	10.214	7	7
E2T9	12.125	10.197	8.63333	30.9553	10.3184	Total	53	212.686		t34=	2.03224			5	12.9592	5	3
E1T1	9.031	9.067	8.933	27.031	9.01033	SE.m	0.724521							6	13.7944	1	1
E1T2	12.8517	12.9987	12.901	38.7513	12.9171	CD	2.08229							7	10.6041	6	6
E1T3	13.424	12.2327	12.5343	38.191	12.7303	CV	10.6661							8	13.0052	3	4
E1T4	9.25667	10.2233	10.555	30.035	10.0117									9	10.0862	8	8
E1T5	12.4377	12.7407	13.2423	38.4207	12.8069									SE.m	0.512313
E1T6	15.4317	13.4223	12.43	41.284	13.7613								Factor B	CD	1.4724
E1T7	10.5773	10.477	10.213	31.2673	10.4224
E1T8	12.66	12.4367	12.8913	37.988	12.6627
E1T9	9.55167	9.42333	10.5867	29.5617	9.85389
Total	223.089	209.638	202.604	635.331	11.7654
Mean	12.3939	11.6465	11.2558
CF	7474.91
TSSQ	212.686	RSSQ	12.0386
tSSQ	147.104	ESSQ	53.5429
		60 DAT
Main factors	2
Sub factors	9	Total factors	18
Replications	3
Treatments	R1	R2	R3	Total	Mean									Factors Mean
E2T1	3.79267	6.492	10.3497	20.6343	6.87811				ANOVA					2	8.87089	1
E2T2	8.598	4.87333	10.3167	23.788	7.92933		df	SS	MSS	Cal F	Table F	Result		1	8.27568	2
E2T3	7.54967	10.5733	8.906	27.029	9.00967	Replication	2	97.2767	48.6384	30.8856	3.2759	S		SE.m	0.457832
E2T4	6.54167	9.36933	13.539	29.45	9.81667	Treatment	17	56.9357	3.34916	2.12673	1.93321	S	Factor A	CD	1.31582
E2T5	7.70667	11.139	7.729	26.5747	8.85822	Factor A	1	4.78271	4.78271	3.03705	4.13002	NS		1	6.42561	9	9
E2T6	3.48433	11.2167	12.6707	27.3717	9.12389	Factor B	8	17499.8	2187.47	1389.05	2.22534	S		2	7.41922	8	5
E2T7	6.40633	10.5823	12.1157	29.1043	9.70144	A*B	8	-17447.6	-2180.95	-1384.92	2.22534	NS		3	8.75644	6	2
E2T8	8.65067	8.439	9.116	26.2057	8.73522	Error	34	192.422	5.65947					4	9.41828	2	7
E2T9	6.05	10.153	13.1533	29.3563	9.78544	Total	53	346.635		t34=	2.03224			5	8.81311	4	3
E1T1	4.29667	5.199	8.42367	17.9193	5.97311	SE.m	1.3735							6	8.62539	7	1
E1T2	4.68567	10.7053	5.33633	20.7273	6.90911	CD	3.94747							7	9.51456	1	6
E1T3	6.09967	12.0333	7.37667	25.5097	8.50322	CV	27.7486							8	8.79467	5	4
E1T4	7.103	8.933	11.0237	27.0597	9.01989									9	9.39228	3	8
E1T5	6.80467	11.419	8.08033	26.304	8.768									SE.m	0.971208
E1T6	6.55833	9.10467	8.71767	24.3807	8.12689								Factor B	CD	2.79128
E1T7	8.216	11.9797	7.78733	27.983	9.32767
E1T8	8.67033	6.55933	11.3327	26.5623	8.85411
E1T9	8.939	12.755	5.30333	26.9973	8.99911
Total	120.153	171.526	171.278	462.957	8.57328
Mean	6.67519	9.52924	9.51543
CF	3969.06
TSSQ	346.635	RSSQ	97.2767
tSSQ	56.9357	ESSQ	192.422
		90 DAT
Main factors	2
Sub factors	9	Total factors	18
Replications	3
Treatments	R1	R2	R3	Total	Mean									Factors Mean
E2T1	2.73	3.06367	2.88333	8.677	2.89233				ANOVA					2	4.53456	1
E2T2	5.55867	6.41433	4.41567	16.3887	5.46289		df	SS	MSS	Cal F	Table F	Result		1	4.25419	2
E2T3	3.27367	1.74967	8.44933	13.4727	4.49089	Replication	2	70.0953	35.0476	22.2554	3.2759	S		SE.m	0.468635
E2T4	6.87867	4.83133	2.05167	13.7617	4.58722	Treatment	17	31.8259	1.87211	1.1888	1.93321	NS	Factor A	CD	1.34687
E2T5	6.69667	2.37133	5.774	14.842	4.94733	Factor A	1	1.0612	1.0612	0.673869	4.13002	NS		1	2.53339	9	9
E2T6	8.452	3.01733	1.70067	13.17	4.39	Factor B	8	4773.44	596.681	378.895	2.22534	S		2	5.44978	1	5
E2T7	6.331	5.393	2.85	14.574	4.858	A*B	8	-4742.68	-592.835	-376.453	2.22534	NS		3	4.36489	7	2
E2T8	5.151	4.661	4.02567	13.8377	4.61256	Error	34	201.61	5.9297					4	4.77967	2	7
E2T9	7.24933	3.72333	2.73667	13.7093	4.56978	Total	53	303.531		t34=	2.03224			5	4.48156	6	3
E1T1	2.90133	3.08967	0.532333	6.52333	2.17444	SE.m	1.4059							6	4.3035	8	1
E1T2	5.18533	0.285667	10.839	16.31	5.43667	CD	4.04061							7	4.58144	3	6
E1T3	5.653	0.687333	6.37633	12.7167	4.23889	CV	55.414							8	4.53239	4	4
E1T4	6.96267	6.83333	1.12033	14.9163	4.97211									9	4.52272	5	8
E1T5	5.796	3.287	2.96433	12.0473	4.01578									SE.m	0.994124
E1T6	6.01067	1.24933	5.391	12.651	4.217								Factor B	CD	2.85714
E1T7	7.06167	1.044	4.809	12.9147	4.30489
E1T8	7.87567	3.59333	1.88767	13.3567	4.45222
E1T9	6.052	0.678333	6.69667	13.427	4.47567
Total	105.819	55.973	75.5037	237.296	4.39437
Mean	5.87885	3.10961	4.19465
CF	1042.77
TSSQ	303.531	RSSQ	70.0953
tSSQ	31.8259	ESSQ	201.61
		2020
		CGR 30DAT
Main factors	2
Sub factors	9	Total factors	18
Replications	3
Treatments	R1	R2	R3	Total	Mean									Factors Mean
E2T1	9.58767	9.22467	11.887	30.6993	10.2331				ANOVA					2	12.1005	1	1
E2T2	13.2313	12.89	14.0973	40.2187	13.4062		df	SS	MSS	Cal F	Table F	Result		1	11.5836	2	2
E2T3	11.326	13.9777	15.053	40.3567	13.4522	Replication	2	14.1714	7.08572	4.49947	3.2759	S		SE.m	0.227203
E2T4	9.75833	10.1897	11.2777	31.2257	10.4086	Treatment	17	147.099	8.65288	5.49462	1.93321	S	Factor A	CD	0.652988
E2T5	14.3297	12.7157	12.2777	39.323	13.1077	Factor A	1	3.60668	3.60668	2.29026	4.13002	NS		1	9.44278	9	9
E2T6	12.736	13.252	15.3597	41.3477	13.7826	Factor B	8	35616.5	4452.06	2827.08	2.22534	S		2	13.1514	3	5
E2T7	9.12933	10.3487	13.592	33.07	11.0233	A*B	8	-35473	-4434.12	-2815.69	2.22534	NS		3	13.1497	4	2
E2T8	13.727	13.087	12.4897	39.3037	13.1012	Error	34	47.3883	1.39377					4	10.1413	8	7
E2T9	9.14133	10.13	11.897	31.1683	10.3894	Total	53	208.659		t34=	2.03224			5	13.3261	2	3
E1T1	9.25667	8.215	8.48567	25.9573	8.65244	SE.m	0.681609							6	13.577	1	1
E1T2	12.363	14.9123	11.4147	38.69	12.8967	CD	1.95896							7	10.5726	6	6
E1T3	11.7823	12.7007	14.0583	38.5413	12.8471	CV	9.96941							8	13.0756	5	4
E1T4	9.38967	10.2253	10.007	29.622	9.874									9	10.1421	7	8
E1T5	15.1167	12.8787	12.638	40.6333	13.5444									SE.m	0.48197
E1T6	12.4633	12.6473	15.0037	40.1143	13.3714								Factor B	CD	1.3852
E1T7	9.06033	9.02067	12.2843	30.3653	10.1218
E1T8	12.2977	13.1183	13.7337	39.1497	13.0499
E1T9	9.264	10.2143	10.2057	29.684	9.89467
Total	203.96	209.748	225.762	639.47	11.842
Mean	11.3311	11.6527	12.5423
CF	7572.64
TSSQ	208.659	RSSQ	14.1714
tSSQ	147.099	ESSQ	47.3883
		60 DAT
Main factors	2
Sub factors	9	Total factors	18
Replications	3
Treatments	R1	R2	R3	Total	Mean									Factors Mean
E2T1	4.65667	5.33367	8.64433	18.6347	6.21156				ANOVA					2	8.76396	1	1
E2T2	10.576	8.23633	4.9	23.7123	7.90411		df	SS	MSS	Cal F	Table F	Result		1	8.20926	2	2
E2T3	12.1663	8.37867	5.77767	26.3227	8.77422	Replication	2	13.2055	6.60277	4.19279	3.2759	S		SE.m	0.482611
E2T4	7.02467	9.30633	12.739	29.07	9.69	Treatment	17	66.633	3.91959	2.48896	1.93321	S	Factor A	CD	1.38704
E2T5	6.57	9.53433	11.1763	27.2807	9.09356	Factor A	1	4.1539	4.1539	2.63775	4.13002	NS		1	6.04294	9	9
E2T6	9.5	10.3037	7.333	27.1367	9.04556	Factor B	8	17167.7	2145.96	1362.7	2.22534	S		2	7.39633	8	5
E2T7	8.937	10.0963	10.538	29.5713	9.85711	A*B	8	-17105.2	-2138.15	-1357.74	2.22534	NS		3	8.74689	4	2
E2T8	9.42533	7.57633	9.60867	26.6103	8.87011	Error	34	213.815	6.28867					4	9.48122	2	7
E2T9	9.15633	12.567	6.565	28.2883	9.42944	Total	53	293.653		t34=	2.03224			5	8.58222	7	3
E1T1	3.711	3.35867	10.5533	17.623	5.87433	SE.m	1.44783							6	8.607	6	1
E1T2	5.9	8.00933	6.75633	20.6657	6.88856	CD	4.16112							7	9.52289	1	6
E1T3	12.013	6.24267	7.903	26.1587	8.71956	CV	29.5492							8	8.61294	5	4
E1T4	7.287	7.244	13.2863	27.8173	9.27244									9	9.38706	3	8
E1T5	3.66333	9.56833	10.981	24.2127	8.07089									SE.m	1.02377
E1T6	6.70333	10.3563	7.44567	24.5053	8.16844								Factor B	CD	2.94235
E1T7	8.06767	10.647	8.85133	27.566	9.18867
E1T8	8.08733	8.61333	8.36667	25.0673	8.35578
E1T9	7.97	8.33267	11.7313	28.034	9.34467
Total	141.415	153.705	163.157	458.277	8.48661
Mean	7.85639	8.53917	9.06428
CF	3889.22
TSSQ	293.653	RSSQ	13.2055
tSSQ	66.633	ESSQ	213.815
		90 DAT
Main factors	2
Sub factors	9	Total factors	18
Replications	3
Treatments	R1	R2	R3	Total	Mean									Factors Mean
E2T1	1.68133	3.06667	3.689	8.437	2.81233				ANOVA					2	4.8748	1
E2T2	3.79067	4.196	9.5	17.4867	5.82889		df	SS	MSS	Cal F	Table F	Result		1	4.43127	2
E2T3	1.00933	3.66633	10.0367	14.7123	4.90411	Replication	2	39.8577	19.9289	12.6549	3.2759	S		SE.m	0.649503
E2T4	8.96633	5.338	1.11367	15.418	5.13933	Treatment	17	31.1026	1.82957	1.16178	1.93321	NS	Factor A	CD	1.86669
E2T5	6.85233	4.71367	3.436	15.002	5.00067	Factor A	1	2.65571	2.65571	1.68639	4.13002	NS		1	3.06639	9	9
E2T6	7.26267	3.523	4.00033	14.786	4.92867	Factor B	8	5328.93	666.116	422.987	2.22534	S		2	5.802	1	5
E2T7	7.631	8.11133	-0.944667	14.7977	4.93256	A*B	8	-5300.48	-662.56	-420.729	2.22534	NS		3	4.40578	8	2
E2T8	4.776	6.03333	4.33567	15.145	5.04833	Error	34	387.262	11.3901					4	5.06156	2	7
E2T9	7.28833	1.723	6.82367	15.835	5.27833	Total	53	458.223		t34=	2.03224			5	4.53489	7	3
E1T1	3.54633	5.39067	1.02433	9.96133	3.32044	SE.m	1.94851							6	4.60511	6	1
E1T2	5.168	1.224	10.9333	17.3253	5.77511	CD	5.60007							7	4.884	3	6
E1T3	0.690333	6.07967	4.95233	11.7223	3.90744	CV	72.5315							8	4.80383	4	4
E1T4	6.813	8.45733	-0.319	14.9513	4.98378									9	4.71378	5	8
E1T5	6.21667	5.22367	0.767	12.2073	4.06911									SE.m	1.3778
E1T6	9.1	0.834	2.91067	12.8447	4.28156								Factor B	CD	3.95985
E1T7	8.84433	3.90033	1.76167	14.5063	4.83544
E1T8	8.41267	1.00967	4.25567	13.678	4.55933
E1T9	7.12233	4.39	0.935333	12.4477	4.14922
Total	105.172	76.8807	69.2117	251.264	4.65304
Mean	5.84287	4.27115	3.84509
CF	1169.14
TSSQ	458.223	RSSQ	39.8577
tSSQ	31.1026	ESSQ	387.262

## Sheet: NPK UPTAKES (kg ha-1)
	Maize N, K & Bio fertigation - yield attributes- 2018-19
N UPTAKE AT 30 DAS (kg ha-1)
Treatments	R1	R2	R3	Total	Mean			ANOVA					Factors Mean
T1- 100%RDF-M0	19.4333	13.0787	11.4849	43.997	14.6657								1	13.0869
T2- 100%RDF-SM	12.494	9.02156	16.2609	37.7765	12.5922		df	SS	MSS	Cal F	Table F		0.75	13.0033
T3-100%RDF-FM3	14.2803	12.9121	14.4317	41.6241	13.8747	Replication	2	20.2119	10.106	0.599038	3.73889	ns	SE.m	1.18569
T4-100%RDF-FM5	10.8509	12.1975	10.5966	33.645	11.215	Treatment	7	42.8499	6.12141	0.362851	2.7642	ns	CD	3.59642
T5- 75%RDF-M0	10	17.1477	12.4077	39.5554	13.1851	RDF	1	0.0419262	0.0419262	0.00248521	4.60011	ns	MC0	13.9254
T6- 75%RDF-SM	10.5127	8.5761	13.1092	32.198	10.7327	MC	3	21.1521	7.05069	0.417935	3.34389	ns	SMC	11.6624
T7-75%RDF-FM3	9.77914	22.8983	9.05709	41.7345	13.9115	RDFxMC	3	21.6559	7.21862	0.427889	3.34389	ns	MC3	13.8931
T8-75%RDF-FM5	12.2622	18.8989	11.3904	42.5515	14.1838	Error	14	236.185	16.8703				MC5	12.6994
Total	99.6126	114.731	98.7385	313.082	13.0451	Total	23	299.246		t14=	2.14479		SE.m	1.67682
Mean	12.4516	14.3414	12.3423			SE.m	2.37138						CD	5.0861
CF	4084.18					CD	7.19284
TSSQ	299.246	RSSQ	20.2119			CV	31.4858
tSSQ	42.8499	ESSQ	236.185
N UPTAKE AT 60 DAS (kg ha-1)
Treatments	R1	R2	R3	Total	Mean			ANOVA					Factors Mean
T1- 100%RDF-M0	142.353	208.457	229.205	580.015	193.338								1	194.745
T2- 100%RDF-SM	126.377	181.688	231.024	539.089	179.696		df	SS	MSS	Cal F	Table F		0.75	162.821
T3-100%RDF-FM3	163.692	185.281	240.187	589.159	196.386	Replication	2	33453.6	16726.8	22.5281	3.73889	sig	SE.m	7.86599
T4-100%RDF-FM5	187.879	217.454	223.338	628.672	209.557	Treatment	7	28143.5	4020.5	5.41492	2.7642	sig	CD	23.859
T5- 75%RDF-M0	0	157.14	151.278	308.418	102.806	RDF	1	6114.71	6114.71	8.23545	4.60011	sig	MC0	148.072
T6- 75%RDF-SM	133.33	125.904	187.052	446.286	148.762	MC	3	14252.8	4750.95	6.3987	3.34389	sig	SMC	164.229
T7-75%RDF-FM3	128.827	212.218	218.872	559.917	186.639	RDFxMC	3	7775.95	2591.98	3.49095	3.34389	sig	MC3	191.513
T8-75%RDF-FM5	147.94	224.172	267.119	639.23	213.077	Error	14	10394.8	742.486				MC5	211.317
Total	1030.4	1512.31	1748.07	4290.79	178.783	Total	23	71991.9		t14=	2.14479		SE.m	11.1242
Mean	128.8	189.039	218.509			SE.m	15.732						CD	33.7418
CF	767118					CD	47.7181
TSSQ	71991.9	RSSQ	33453.6			CV	15.2412
tSSQ	28143.5	ESSQ	10394.8
N UPTAKE AT 90 DAS (kg ha-1)
Treatments	R1	R2	R3	Total	Mean			ANOVA					Factors Mean
T1- 100%RDF-M0	328.859	252.279	258.27	839.407	279.802								1	328.585
T2- 100%RDF-SM	298.986	297.732	354.776	951.495	317.165		df	SS	MSS	Cal F	Table F		0.75	329.05
T3-100%RDF-FM3	360.178	316.661	360.359	1037.2	345.733	Replication	2	-1.10943e+06	-554713	-6.00649	3.73889	ns	SE.m	87.727
T4-100%RDF-FM5	394.787	309.165	410.968	1114.92	371.64	Treatment	7	43086.1	6155.15	0.0666486	2.7642	ns	CD	266.092
T5- 75%RDF-M0	0	267.259	477.089	744.348	248.116	RDF	1	1.29579	1.29579	1.4031e-05	4.60011	ns	MC0	263.959
T6- 75%RDF-SM	292.686	367.866	369.949	1030.5	343.5	MC	3	40385	13461.7	0.145764	3.34389	ns	SMC	330.333
T7-75%RDF-FM3	248.832	286.789	493.761	1029.38	343.127	RDFxMC	3	2699.79	899.931	0.00974455	3.34389	ns	MC3	344.43
T8-75%RDF-FM5	360.254	483.815	300.299	1144.37	381.456	Error	14	1.29293e+06	92352.2				MC5	376.548
Total	2284.58	2581.57		7891.62	328.817	Total	23	226591		t14=	2.14479		SE.m	124.065
Mean	285.573	322.696	#VALUE!			SE.m	175.454						CD	376.311
CF	2.5949e+06					CD	532.184
TSSQ	226591	RSSQ	-1.10943e+06			CV	92.4206
tSSQ	43086.1	ESSQ	1.29293e+06
N UPTAKE IN STRAW AT HARVEST (kg ha-1)
Treatments	R1	R2	R3	Total	Mean			ANOVA					Factors Mean
T1- 100%RDF-M0	123.62	167.721	146.78	438.121	146.04								1	147.071
T2- 100%RDF-SM	110.381	104.808	95.7596	310.949	103.65		df	SS	MSS	Cal F	Table F		0.75	127.435
T3-100%RDF-FM3	180.991	224.725	93.5838	499.3	166.433	Replication	2	4854.14	2427.07	1.23856	3.73889	ns	SE.m	12.7789
T4-100%RDF-FM5	196.261	182.318	137.899	516.478	172.159	Treatment	7	37505.4	5357.92	2.73419	2.7642	ns	CD	38.7607
T5- 75%RDF-M0	0	153.531	106.337	259.868	86.6225	RDF	1	2313.43	2313.43	1.18057	4.60011	ns	MC0	116.331
T6- 75%RDF-SM	76.9647	95.8343	107.758	280.557	93.519	MC	3	27813.2	9271.08	4.73111	3.34389	sig	SMC	98.5843
T7-75%RDF-FM3	111.682	112.803	149.315	373.8	124.6	RDFxMC	3	7378.77	2459.59	1.25515	3.34389	ns	MC3	145.517
T8-75%RDF-FM5	259.576	210.839	144.576	614.991	204.997	Error	14	27434.4	1959.6				MC5	188.578
Total	1059.48	1252.58	982.008	3294.06	137.253	Total	23	69793.9		t14=	2.14479		SE.m	18.0721
Mean	132.434	156.572	122.751			SE.m	25.5578						CD	54.8159
CF	452119					CD	77.5214
TSSQ	69793.9	RSSQ	4854.14			CV	32.2525
tSSQ	37505.4	ESSQ	27434.4
N UPTAKE IN GRAIN AT HARVEST (kg ha-1)
Treatments	R1	R2	R3	Total	Mean			ANOVA					Factors Mean
T1- 100%RDF-M0				0	0								1	0
T2- 100%RDF-SM				0	0		df	SS	MSS	Cal F	Table F		0.75	0
T3-100%RDF-FM3				0	0	Replication	2	0	0	#DIV/0!	3.73889	#DIV/0!	SE.m	0
T4-100%RDF-FM5				0	0	Treatment	7	0	0	#DIV/0!	2.7642	#DIV/0!	CD	0
T5- 75%RDF-M0				0	0	RDF	1	0	0	#DIV/0!	4.60011	#DIV/0!	MC0	0
T6- 75%RDF-SM				0	0	MC	3	0	0	#DIV/0!	3.34389	#DIV/0!	SMC	0
T7-75%RDF-FM3				0	0	RDFxMC	3	0	0	#DIV/0!	3.34389	#DIV/0!	MC3	0
T8-75%RDF-FM5				0	0	Error	14	0	0				MC5	0
Total	0	0	0	0	#DIV/0!	Total	23	0		t14=	2.14479		SE.m	0
Mean	0	0	0			SE.m	0						CD	0
CF	0					CD	0
TSSQ	0	RSSQ	0			CV	#DIV/0!
tSSQ	0	ESSQ	0
TOTAL N UPTAKE AT HARVEST (kg ha-1)
Treatments	R1	R2	R3	Total	Mean			ANOVA					Factors Mean
T1- 100%RDF-M0	123.62	167.721	146.78	438.121	146.04								1	147.071
T2- 100%RDF-SM	110.381	104.808	95.7596	310.949	103.65		df	SS	MSS	Cal F	Table F		0.75	127.435
T3-100%RDF-FM3	180.991	224.725	93.5838	499.3	166.433	Replication	2	4854.14	2427.07	1.23856	3.73889	ns	SE.m	12.7789
T4-100%RDF-FM5	196.261	182.318	137.899	516.478	172.159	Treatment	7	37505.4	5357.92	2.73419	2.7642	ns	CD	38.7607
T5- 75%RDF-M0	0	153.531	106.337	259.868	86.6225	RDF	1	2313.43	2313.43	1.18057	4.60011	ns	MC0	116.331
T6- 75%RDF-SM	76.9647	95.8343	107.758	280.557	93.519	MC	3	27813.2	9271.08	4.73111	3.34389	sig	SMC	98.5843
T7-75%RDF-FM3	111.682	112.803	149.315	373.8	124.6	RDFxMC	3	7378.77	2459.59	1.25515	3.34389	ns	MC3	145.517
T8-75%RDF-FM5	259.576	210.839	144.576	614.991	204.997	Error	14	27434.4	1959.6				MC5	188.578
Total	1059.48	1252.58	982.008	3294.06	137.253	Total	23	69793.9		t14=	2.14479		SE.m	18.0721
Mean	132.434	156.572	122.751			SE.m	25.5578						CD	54.8159
CF	452119					CD	77.5214
TSSQ	69793.9	RSSQ	4854.14			CV	32.2525
tSSQ	37505.4	ESSQ	27434.4
P UPTAKE AT 30 DAS (kg ha-1)
Treatments	R1	R2	R3	Total	Mean			ANOVA					Factors Mean
T1- 100%RDF-M0	3.98543	2.09646	2.05587	8.13776	2.71259								1	2.34909
T2- 100%RDF-SM	2.36872	1.84264	2.89631	7.10767	2.36922		df	SS	MSS	Cal F	Table F		0.75	1.9442
T3-100%RDF-FM3	2.58362	2.09345	2.56666	7.24372	2.41457	Replication	2	0.42108	0.21054	0.301685	3.73889	ns	SE.m	0.241157
T4-100%RDF-FM5	2.03793	2.04999	1.61205	5.69998	1.89999	Treatment	7	3.57083	0.510119	0.730955	2.7642	ns	CD	0.731474
T5- 75%RDF-M0	0	2.76305	1.58666	4.34971	1.4499	RDF	1	0.983636	0.983636	1.40946	4.60011	ns	MC0	2.08125
T6- 75%RDF-SM	2.55921	1.36345	1.47438	5.39704	1.79901	MC	3	0.124145	0.0413817	0.0592962	3.34389	ns	SMC	2.08412
T7-75%RDF-FM3	1.50007	3.1843	1.61445	6.29882	2.09961	RDFxMC	3	2.46305	0.821018	1.17645	3.34389	ns	MC3	2.25709
T8-75%RDF-FM5	2.643	2.7494	1.89242	7.28482	2.42827	Error	14	9.77033	0.69788				MC5	2.16413
Total	17.678	18.1427	15.6988	51.5195	2.14665	Total	23	13.7622		t14=	2.14479		SE.m	0.341048
Mean	2.20975	2.26784	1.96235			SE.m	0.482314						CD	1.03446
CF	110.594					CD	1.46295
TSSQ	13.7622	RSSQ	0.42108			CV	38.9162
tSSQ	3.57083	ESSQ	9.77033
P UPTAKE AT 60 DAS (kg ha-1)
Treatments	R1	R2	R3	Total	Mean			ANOVA					Factors Mean
T1- 100%RDF-M0	21.7499	27.7715	30.8175	80.3389	26.7796								1	27.696
T2- 100%RDF-SM	19.3676	27.1028	35.1793	81.6497	27.2166		df	SS	MSS	Cal F	Table F		0.75	22.5437
T3-100%RDF-FM3	18.6517	27.5808	29.7793	76.0118	25.3373	Replication	2	705.005	352.503	12.0997	3.73889	sig	SE.m	1.55813
T4-100%RDF-FM5	23.294	40.394	30.6631	94.3511	31.4504	Treatment	7	388.166	55.4523	1.9034	2.7642	ns	CD	4.7261
T5- 75%RDF-M0	0	26.6724	26.9999	53.6723	17.8908	RDF	1	159.273	159.273	5.46705	4.60011	sig	MC0	22.3352
T6- 75%RDF-SM	20.8166	19.1744	20.447	60.438	20.146	MC	3	169.055	56.3516	1.93427	3.34389	ns	SMC	23.6813
T7-75%RDF-FM3	15.6308	32.994	25.7205	74.3453	24.7818	RDFxMC	3	59.8383	19.9461	0.684651	3.34389	ns	MC3	25.0595
T8-75%RDF-FM5	20.1688	27.996	33.9043	82.069	27.3563	Error	14	407.865	29.1332				MC5	29.4034
Total	139.679	229.686	233.511	602.876	25.1198	Total	23	1501.04		t14=	2.14479		SE.m	2.20353
Mean	17.4599	28.7107	29.1889			SE.m	3.11626						CD	6.68371
CF	15144.1					CD	9.4522
TSSQ	1501.04	RSSQ	705.005			CV	21.4871
tSSQ	388.166	ESSQ	407.865
P UPTAKE AT 90 DAS (kg ha-1)
Treatments	R1	R2	R3	Total	Mean			ANOVA					Factors Mean
T1- 100%RDF-M0	58.3674	45.9998	46.3233	150.691	50.2302								1	59.0145
T2- 100%RDF-SM	61.088	54.588	59.4213	175.097	58.3658		df	SS	MSS	Cal F	Table F		0.75	58.2052
T3-100%RDF-FM3	76.5242	65.6762	55.0586	197.259	65.753	Replication	2	165.037	82.5185	0.249659	3.73889	ns	SE.m	5.24821
T4-100%RDF-FM5	65.3821	57.1566	62.588	185.127	61.7089	Treatment	7	1809.62	258.517	0.78214	2.7642	ns	CD	15.9188
T5- 75%RDF-M0	0	45.0979	80.4605	125.558	41.8528	RDF	1	3.92911	3.92911	0.0118875	4.60011	ns	MC0	46.0415
T6- 75%RDF-SM	63.4017	73.6026	55.588	192.592	64.1975	MC	3	1376.84	458.948	1.38854	3.34389	ns	SMC	61.2816
T7-75%RDF-FM3	41.6469	52.9998	72.7938	167.441	55.8135	RDFxMC	3	428.843	142.948	0.432487	3.34389	ns	MC3	60.7833
T8-75%RDF-FM5	72.9997	85.5193	54.3527	212.872	70.9572	Error	14	4627.34	330.525				MC5	66.3331
Total	439.41	480.64	486.586	1406.64	58.6099	Total	23	6602		t14=	2.14479		SE.m	7.42209
Mean	54.9263	60.08	60.8233			SE.m	10.4964						CD	22.5126
CF	82442.8					CD	31.8376
TSSQ	6602	RSSQ	165.037			CV	31.0192
tSSQ	1809.62	ESSQ	4627.34
P UPTAKE IN STRAW AT HARVEST (kg ha-1)
Treatments	R1	R2	R3	Total	Mean			ANOVA					Factors Mean
T1- 100%RDF-M0	82.5891	15.0474	24.611	122.248	40.7492								1	28.7485
T2- 100%RDF-SM	37.8448	19.5588	14.5666	71.9703	23.9901		df	SS	MSS	Cal F	Table F		0.75	18.5066
T3-100%RDF-FM3	26.4532	33.7932	18.2638	78.5102	26.1701	Replication	2	358.834	179.417	0.787942	3.73889	ns	SE.m	4.35606
T4-100%RDF-FM5	24.1988	26.7132	21.3416	72.2536	24.0845	Treatment	7	1329.58	189.94	0.834155	2.7642	ns	CD	13.2127
T5- 75%RDF-M0	0	23.6835	16.8788	40.5623	13.5208	RDF	1	629.377	629.377	2.76402	4.60011	ns	MC0	27.135
T6- 75%RDF-SM	20.361	11.4088	24.3521	56.122	18.7073	MC	3	109.506	36.502	0.160305	3.34389	ns	SMC	21.3487
T7-75%RDF-FM3	21.2727	14.7286	23.7007	59.702	19.9007	RDFxMC	3	590.696	196.899	0.864717	3.34389	ns	MC3	23.0354
T8-75%RDF-FM5	19.9674	24.5421	21.1832	65.6928	21.8976	Error	14	3187.85	227.703				MC5	22.9911
Total	232.687	169.476	164.898	567.061	23.6275	Total	23	4876.26		t14=	2.14479		SE.m	6.1604
Mean	29.0859	21.1845	20.6122			SE.m	8.71212						CD	18.6856
CF	13398.2					CD	26.4255
TSSQ	4876.26	RSSQ	358.834			CV	63.8655
tSSQ	1329.58	ESSQ	3187.85
P UPTAKE IN GRAIN AT HARVEST (kg ha-1)
Treatments	R1	R2	R3	Total	Mean			ANOVA					Factors Mean
T1- 100%RDF-M0				0	0								1	0
T2- 100%RDF-SM				0	0		df	SS	MSS	Cal F	Table F		0.75	0
T3-100%RDF-FM3				0	0	Replication	2	0	0	#DIV/0!	3.73889	#DIV/0!	SE.m	0
T4-100%RDF-FM5				0	0	Treatment	7	0	0	#DIV/0!	2.7642	#DIV/0!	CD	0
T5- 75%RDF-M0				0	0	RDF	1	0	0	#DIV/0!	4.60011	#DIV/0!	MC0	0
T6- 75%RDF-SM				0	0	MC	3	0	0	#DIV/0!	3.34389	#DIV/0!	SMC	0
T7-75%RDF-FM3				0	0	RDFxMC	3	0	0	#DIV/0!	3.34389	#DIV/0!	MC3	0
T8-75%RDF-FM5				0	0	Error	14	0	0				MC5	0
Total	0	0	0	0	#DIV/0!	Total	23	0		t14=	2.14479		SE.m	0
Mean	0	0	0			SE.m	0						CD	0
CF	0					CD	0
TSSQ	0	RSSQ	0			CV	#DIV/0!
tSSQ	0	ESSQ	0
TOTAL P UPTAKE AT HARVEST (kg ha-1)
Treatments	R1	R2	R3	Total	Mean			ANOVA					Factors Mean
T1- 100%RDF-M0	82.5891	15.0474	24.611	122.248	40.7492								1	28.7485
T2- 100%RDF-SM	37.8448	19.5588	14.5666	71.9703	23.9901		df	SS	MSS	Cal F	Table F		0.75	18.5066
T3-100%RDF-FM3	26.4532	33.7932	18.2638	78.5102	26.1701	Replication	2	358.834	179.417	0.787942	3.73889	ns	SE.m	4.35606
T4-100%RDF-FM5	24.1988	26.7132	21.3416	72.2536	24.0845	Treatment	7	1329.58	189.94	0.834155	2.7642	ns	CD	13.2127
T5- 75%RDF-M0	0	23.6835	16.8788	40.5623	13.5208	RDF	1	629.377	629.377	2.76402	4.60011	ns	MC0	27.135
T6- 75%RDF-SM	20.361	11.4088	24.3521	56.122	18.7073	MC	3	109.506	36.502	0.160305	3.34389	ns	SMC	21.3487
T7-75%RDF-FM3	21.2727	14.7286	23.7007	59.702	19.9007	RDFxMC	3	590.696	196.899	0.864717	3.34389	ns	MC3	23.0354
T8-75%RDF-FM5	19.9674	24.5421	21.1832	65.6928	21.8976	Error	14	3187.85	227.703				MC5	22.9911
Total	232.687	169.476	164.898	567.061	23.6275	Total	23	4876.26		t14=	2.14479		SE.m	6.1604
Mean	29.0859	21.1845	20.6122			SE.m	8.71212						CD	18.6856
CF	13398.2					CD	26.4255
TSSQ	4876.26	RSSQ	358.834			CV	63.8655
tSSQ	1329.58	ESSQ	3187.85
K UPTAKE AT 30 DAS (kg ha-1)
Treatments	R1	R2	R3	Total	Mean			ANOVA					Factors Mean
T1- 100%RDF-M0	19.1854	12.2472	9.92188	41.3545	13.7848								1	13.2861
T2- 100%RDF-SM	14.3877	13.8277	17.7886	46.004	15.3347		df	SS	MSS	Cal F	Table F		0.75	10.5652
T3-100%RDF-FM3	14.6212	6.9072	14.6826	36.211	12.0703	Replication	2	3.98639	1.9932	0.0950127	3.73889	ns	SE.m	1.32219
T4-100%RDF-FM5	10.3668	12.8124	12.6845	35.8638	11.9546	Treatment	7	83.8294	11.9756	0.57086	2.7642	ns	CD	4.01045
T5- 75%RDF-M0	0	14.8764	13.3132	28.1896	9.39654	RDF	1	44.4201	44.4201	2.11744	4.60011	ns	MC0	11.5907
T6- 75%RDF-SM	8.86026	7.2185	12.8065	28.8853	9.62843	MC	3	4.39762	1.46587	0.069876	3.34389	ns	SMC	12.4815
T7-75%RDF-FM3	11.7157	17.0597	8.17883	36.9542	12.3181	RDFxMC	3	35.0117	11.6706	0.556318	3.34389	ns	MC3	12.1942
T8-75%RDF-FM5	11.6707	12.4476	8.63492	32.7532	10.9177	Error	14	293.695	20.9782				MC5	11.4362
Total	90.8079	97.3966	98.011	286.216	11.9256	Total	23	381.511		t14=	2.14479		SE.m	1.86986
Mean	11.351	12.1746	12.2514			SE.m	2.64438						CD	5.67163
CF	3413.31					CD	8.02089
TSSQ	381.511	RSSQ	3.98639			CV	38.4063
tSSQ	83.8294	ESSQ	293.695
K UPTAKE AT 60 DAS (kg ha-1)
Treatments	R1	R2	R3	Total	Mean			ANOVA					Factors Mean
T1- 100%RDF-M0	93.2021	160.701	157.169	411.072	137.024								1	124.537
T2- 100%RDF-SM	75.5077	103.361	152.613	331.482	110.494		df	SS	MSS	Cal F	Table F		0.75	96.5126
T3-100%RDF-FM3	117.98	147.922	119.625	385.526	128.509	Replication	2	9094.25	4547.12	4.21052	3.73889	sig	SE.m	9.48659
T4-100%RDF-FM5	96.3596	144.533	125.465	366.358	122.119	Treatment	7	8345.04	1192.15	1.1039	2.7642	ns	CD	28.7746
T5- 75%RDF-M0	0	135.286	89.1221	224.408	74.8028	RDF	1	4712.05	4712.05	4.36323	4.60011	ns	MC0	105.913
T6- 75%RDF-SM	101.377	79.0466	114.852	295.276	98.4252	MC	3	794.527	264.842	0.245237	3.34389	ns	SMC	104.46
T7-75%RDF-FM3	89.362	99.9676	102.63	291.959	97.3197	RDFxMC	3	2838.47	946.155	0.876114	3.34389	ns	MC3	112.914
T8-75%RDF-FM5	97.6897	70.3411	178.477	346.508	115.503	Error	14	15119.2	1079.94				MC5	118.811
Total	671.478	941.158	1039.95	2652.59	110.525	Total	23	32558.5		t14=	2.14479		SE.m	13.4161
Mean	83.9347	117.645	129.994			SE.m	18.9732						CD	40.6934
CF	293176					CD	57.5492
TSSQ	32558.5	RSSQ	9094.25			CV	29.7332
tSSQ	8345.04	ESSQ	15119.2
K UPTAKE AT 90 DAS (kg ha-1)
Treatments	R1	R2	R3	Total	Mean			ANOVA					Factors Mean
T1- 100%RDF-M0	235.304	161.839	167.708	564.851	188.284								1	195.306
T2- 100%RDF-SM	191.284	199.133	209.696	600.113	200.038		df	SS	MSS	Cal F	Table F		0.75	197.152
T3-100%RDF-FM3	218.242	180.564	199.333	598.139	199.38	Replication	2	3439.61	1719.81	0.547276	3.73889	ns	SE.m	16.1825
T4-100%RDF-FM5	212.007	191.859	176.699	580.566	193.522	Treatment	7	14241.3	2034.47	0.64741	2.7642	ns	CD	49.0846
T5- 75%RDF-M0	0	207.613	218.852	426.465	142.155	RDF	1	20.4547	20.4547	0.0065091	4.60011	ns	MC0	165.219
T6- 75%RDF-SM	219.282	284.374	174.649	678.306	226.102	MC	3	8506.78	2835.59	0.902342	3.34389	ns	SMC	213.07
T7-75%RDF-FM3	174.639	186.319	224.729	585.688	195.229	RDFxMC	3	5714.08	1904.69	0.606111	3.34389	ns	MC3	197.304
T8-75%RDF-FM5	207.319	280.279	187.769	675.367	225.122	Error	14	43994.8	3142.48				MC5	209.322
Total	1458.08	1691.98	1559.44	4709.49	196.229	Total	23	61675.7		t14=	2.14479		SE.m	22.8855
Mean	182.26	211.497	194.929			SE.m	32.365						CD	69.4161
CF	924139					CD	98.1691
TSSQ	61675.7	RSSQ	3439.61			CV	28.5676
tSSQ	14241.3	ESSQ	43994.8
K UPTAKE IN STRAW AT HARVEST (kg ha-1)
Treatments	R1	R2	R3	Total	Mean			ANOVA					Factors Mean
T1- 100%RDF-M0	469.176	504.205	412.874	1386.26	462.085								1	386.591
T2- 100%RDF-SM	264.914	254.939	302.099	821.952	273.984		df	SS	MSS	Cal F	Table F		0.75	399.467
T3-100%RDF-FM3	160.767	575.329	400.197	1136.29	378.764	Replication	2	48340.5	24170.2	2.13273	3.73889	ns	SE.m	30.7314
T4-100%RDF-FM5	368.99	512.894	412.713	1294.6	431.532	Treatment	7	190716	27245.1	2.40405	2.7642	ns	CD	93.214
T5- 75%RDF-M0	0	354.017	368.726	722.743	240.914	RDF	1	994.599	994.599	0.0877611	4.60011	ns	MC0	351.5
T6- 75%RDF-SM	421.229	293.92	414.856	1130.01	376.668	MC	3	73836.4	24612.1	2.17172	3.34389	ns	SMC	325.326
T7-75%RDF-FM3	523.888	457.971	543.763	1525.62	508.541	RDFxMC	3	115885	38628.2	3.40847	3.34389	sig	MC3	443.653
T8-75%RDF-FM5	430.726	492.627	491.875	1415.23	471.743	Error	14	158662	11333				MC5	451.638
Total	2639.69	3445.9	3347.1	9432.7	393.029	Total	23	397718		t14=	2.14479		SE.m	43.4608
Mean	329.961	430.738	418.388			SE.m	61.4628						CD	131.825
CF	3.70732e+06					CD	186.428
TSSQ	397718	RSSQ	48340.5			CV	27.0862
tSSQ	190716	ESSQ	158662
K UPTAKE IN GRAIN AT HARVEST (kg ha-1)
Treatments	R1	R2	R3	Total	Mean			ANOVA					Factors Mean
T1- 100%RDF-M0				0	0								1	0
T2- 100%RDF-SM				0	0		df	SS	MSS	Cal F	Table F		0.75	0
T3-100%RDF-FM3				0	0	Replication	2	0	0	#DIV/0!	3.73889	#DIV/0!	SE.m	0
T4-100%RDF-FM5				0	0	Treatment	7	0	0	#DIV/0!	2.7642	#DIV/0!	CD	0
T5- 75%RDF-M0				0	0	RDF	1	0	0	#DIV/0!	4.60011	#DIV/0!	MC0	0
T6- 75%RDF-SM				0	0	MC	3	0	0	#DIV/0!	3.34389	#DIV/0!	SMC	0
T7-75%RDF-FM3				0	0	RDFxMC	3	0	0	#DIV/0!	3.34389	#DIV/0!	MC3	0
T8-75%RDF-FM5				0	0	Error	14	0	0				MC5	0
Total	0	0	0	0	#DIV/0!	Total	23	0		t14=	2.14479		SE.m	0
Mean	0	0	0			SE.m	0						CD	0
CF	0					CD	0
TSSQ	0	RSSQ	0			CV	#DIV/0!
tSSQ	0	ESSQ	0
TOTAL K UPTAKE AT HARVEST (kg ha-1)
Treatments	R1	R2	R3	Total	Mean			ANOVA					Factors Mean
T1- 100%RDF-M0	469.176	504.205	412.874	1386.26	462.085								1	386.591
T2- 100%RDF-SM	264.914	254.939	302.099	821.952	273.984		df	SS	MSS	Cal F	Table F		0.75	399.467
T3-100%RDF-FM3	160.767	575.329	400.197	1136.29	378.764	Replication	2	48340.5	24170.2	2.13273	3.73889	ns	SE.m	30.7314
T4-100%RDF-FM5	368.99	512.894	412.713	1294.6	431.532	Treatment	7	190716	27245.1	2.40405	2.7642	ns	CD	93.214
T5- 75%RDF-M0	0	354.017	368.726	722.743	240.914	RDF	1	994.599	994.599	0.0877611	4.60011	ns	MC0	351.5
T6- 75%RDF-SM	421.229	293.92	414.856	1130.01	376.668	MC	3	73836.4	24612.1	2.17172	3.34389	ns	SMC	325.326
T7-75%RDF-FM3	523.888	457.971	543.763	1525.62	508.541	RDFxMC	3	115885	38628.2	3.40847	3.34389	sig	MC3	443.653
T8-75%RDF-FM5	430.726	492.627	491.875	1415.23	471.743	Error	14	158662	11333				MC5	451.638
Total	2639.69	3445.9	3347.1	9432.7	393.029	Total	23	397718		t14=	2.14479		SE.m	43.4608
Mean	329.961	430.738	418.388			SE.m	61.4628						CD	131.825
CF	3.70732e+06					CD	186.428
TSSQ	397718	RSSQ	48340.5			CV	27.0862
tSSQ	190716	ESSQ	158662

## Sheet: Sheet2
		Cost of cultivation (Rs /ha) of rabi maize as influenced by different drip fertigation levels.
	S.NO.	Treatment	Land preparation	Seeds and sowing	Fertilizers cost	Cost of fertilizer application	Weed control	Plant protection	Harvesting, threshing,cleaning and packing	Transport	Cost of water (Rs. ha mm-1)	cost of irrigation	Cost of drip system	Total production cost	Grain yield yield (kg ha-1)	Income from Grain (Rs. ha-1)	Income from Straw (Rs. ha-1)	Total Gross Returns(Rs. ha-1)	Net Returns(Rs. ha-1)	B:C ratio
	1	T1- 100%RDF-M0	6000	4220	17686.2	1000	3900	3460	16000	3306.88	5412.9	1500	9600	70586	6613.76	94246	3500	97746	27160.1	1.38478
	2	T2- 100%RDF-SM	6000	4220	18186.2	1000	3900	3460	16000	3844.25	5412.9	1500	9600	71623.3	7688.49	109561	3500	113061	41437.7	1.57855
	3	T3-100%RDF-FM3	6000	4220	18186.2	1000	3900	3460	16000	3893.85	5412.9	1500	9600	71672.9	7787.7	110975	3500	114475	42801.8	1.59718
	4	T4-100%RDF-FM5	6000	4220	18186.2	1000	3900	3460	16000	4067.46	5412.9	1500	9600	71846.6	8134.92	115923	3500	119423	47576.1	1.66219
	5	T5- 75%RDF-M0	6000	4220	13264.8	1000	3900	3460	16000	3348.21	5412.9	1500	9600	64357.7	6696.43	95424.1	3500	98924.1	34566.4	1.5371
	6	T6- 75%RDF-SM	6000	4220	13764.8	1000	3900	3460	16000	3348.21	5412.9	1500	9600	64857.7	6696.43	95424.1	3500	98924.1	34066.4	1.52525
	7	T7-75%RDF-FM3	6000	4220	13764.8	1000	3900	3460	16000	3968.25	5412.9	1500	9600	64857.7	7936.51	113095	3500	116595	51737.5	1.79771
	8	T8-75%RDF-FM5	6000	4220	13764.8	1000	3900	3460	16000	4092.26	5412.9	1500	9600	64857.7	8184.52	116629	3500	120129	55271.8	1.8522

## Sheet: RGR
		2019
		RGR 30DAT
Main factors	2
Sub factors	9	Total factors	18
Replications	3
Treatments	R1	R2	R3	Total	Mean									Factors Mean
E2T1	0.0367991	0.0302982	0.0342274	0.101325	0.0337749				ANOVA					1	0.0301654	2
E2T2	0.0328136	0.03193	0.0306123	0.095356	0.0317853		df	SS	MSS	Cal F	Table F	Result		2	0.03039	1
E2T3	0.0326379	0.0303312	0.0268631	0.0898323	0.0299441	Replication	2	0.000262199	0.0001311	16.111	3.2759	S		SE.m	0.000548981
E2T4	0.0348233	0.026921	0.0223581	0.0841025	0.0280342	Treatment	17	0.000194749	1.14558e-05	1.40783	1.93321	NS	Factor A	CD	0.00157779
E2T5	0.0305133	0.0302276	0.0294727	0.0902136	0.0300712	Factor A	1	6.81128e-07	6.81128e-07	0.0837049	4.13002	NS		1	0.0340019	1	9
E2T6	0.0373185	0.0282898	0.0254513	0.0910597	0.0303532	Factor B	8	0.225439	0.0281798	3463.06	2.22534	S		2	0.0317312	2	5
E2T7	0.0350697	0.0317578	0.0191514	0.0859789	0.0286596	A*B	8	-0.225244	-0.0281556	-3460.08	2.22534	NS		3	0.0302464	6	2
E2T8	0.0330298	0.030936	0.0291593	0.0931251	0.0310417	Error	34	0.000276667	8.13726e-06					4	0.0279047	8	7
E2T9	0.0322161	0.027697	0.0235593	0.0834724	0.0278241	Total	53	0.000733615		t34=	2.03224			5	0.0304643	5	3
E1T1	0.0383126	0.0373595	0.0270148	0.102687	0.0342289	SE.m	0.00164694							6	0.0308361	4	1
E1T2	0.0319451	0.0320337	0.0310527	0.0950315	0.0316772	CD	0.00473336							7	0.0284554	7	6
E1T3	0.0350942	0.0290016	0.02755	0.0916459	0.0305486	CV	9.42142							8	0.0310336	3	4
E1T4	0.0268054	0.0289344	0.0275859	0.0833258	0.0277753									9	0.0278256	9	8
E1T5	0.0313996	0.0303036	0.0308689	0.0925721	0.0308574									SE.m	0.00116456
E1T6	0.0356795	0.0304374	0.0278398	0.0939567	0.0313189								Factor B	CD	0.00334699
E1T7	0.0292483	0.0285847	0.0269206	0.0847536	0.0282512
E1T8	0.0328968	0.0302449	0.0299346	0.0930763	0.0310254
E1T9	0.028247	0.0270531	0.028181	0.0834812	0.0278271
Total	0.59485	0.542342	0.497803	1.63499	0.0302777
Mean	0.0330472	0.0301301	0.0276557
CF	0.0495039
TSSQ	0.000733615	RSSQ	0.000262199
tSSQ	0.000194749	ESSQ	0.000276667
		60 DAT
Main factors	2
Sub factors	9	Total factors	18
Replications	3
Treatments	R1	R2	R3	Total	Mean									Factors Mean
E2T1	0.00830614	0.0128757	0.0164645	0.0376463	0.0125488				ANOVA					2	0.012231	1
E2T2	0.0114126	0.00666616	0.0126731	0.0307519	0.0102506		df	SS	MSS	Cal F	Table F	Result		1	0.0118092	2
E2T3	0.00979462	0.0129456	0.0110548	0.0337951	0.011265	Replication	2	0.000137621	6.88104e-05	8.45622	3.2759	S		SE.m	0.000587448
E2T4	0.00956695	0.0139185	0.0192306	0.042716	0.0142387	Treatment	17	0.000125407	7.37689e-06	0.906557	1.93321	NS	Factor A	CD	0.00168834
E2T5	0.0100717	0.0136204	0.00992706	0.0336192	0.0112064	Factor A	1	2.40188e-06	2.40188e-06	0.295171	4.13002	NS		1	0.0119928	4	9
E2T6	0.00432178	0.0137497	0.0149428	0.0330142	0.0110047	Factor B	8	0.0338084	0.00422605	519.346	2.22534	S		2	0.00977863	9	5
E2T7	0.00911556	0.0141739	0.0191237	0.0424131	0.0141377	A*B	8	-0.0336854	-0.00421067	-517.456	2.22534	NS		3	0.0111724	7	2
E2T8	0.0111249	0.0108173	0.0114231	0.0333652	0.0111217	Error	34	0.000316798	9.31758e-06					4	0.0139303	2	7
E2T9	0.00897932	0.0148637	0.019072	0.042915	0.014305	Total	53	0.000579826		t34=	2.03224			5	0.0113276	6	3
E1T1	0.00938114	0.0108917	0.0140375	0.0343104	0.0114368	SE.m	0.00176234							6	0.010622	8	1
E1T2	0.00675829	0.013705	0.00745659	0.0279199	0.00930662	CD	0.00506503							7	0.0139155	3	6
E1T3	0.00863832	0.0150698	0.00953089	0.033239	0.0110797	CV	25.3948							8	0.0113956	5	4
E1T4	0.0117819	0.0136705	0.0154135	0.0408659	0.013622									9	0.0140459	1	8
E1T5	0.00960139	0.0142881	0.0104569	0.0343464	0.0114488									SE.m	0.00124617
E1T6	0.00820971	0.0113614	0.0111468	0.0307179	0.0102393								Factor B	CD	0.00358152
E1T7	0.0124715	0.0168614	0.0117468	0.0410796	0.0136932
E1T8	0.011913	0.00911663	0.0139785	0.0350081	0.0116694
E1T9	0.0142805	0.0186991	0.00838074	0.0413603	0.0137868
Total	0.175729	0.237294	0.23606	0.649084	0.0120201
Mean	0.00976274	0.013183	0.0131144
CF	0.00780203
TSSQ	0.000579826	RSSQ	0.000137621
tSSQ	0.000125407	ESSQ	0.000316798
		90 DAT
Main factors	2
Sub factors	9	Total factors	18
Replications	3
Treatments	R1	R2	R3	Total	Mean									Factors Mean
E2T1	0.0049118	0.00469371	0.00343627	0.0130418	0.00434726				ANOVA					2	0.0048776	1
E2T2	0.00572655	0.00713198	0.0042319	0.0170904	0.00569681		df	SS	MSS	Cal F	Table F	Result		1	0.00481578	2
E2T3	0.00349069	0.00172959	0.00790904	0.0131293	0.00437644	Replication	2	9.53599e-05	4.768e-05	5.85946	3.2759	S		SE.m	0.000505381
E2T4	0.00776577	0.0054044	0.00214389	0.0153141	0.00510469	Treatment	17	1.9321e-05	1.13653e-06	0.13967	1.93321	NS	Factor A	CD	0.00145248
E2T5	0.00680816	0.00229912	0.00586591	0.0149732	0.00499106	Factor A	1	5.15931e-08	5.15931e-08	0.00634036	4.13002	NS		1	0.00399604	9	9
E2T6	0.00861619	0.00290083	0.00157839	0.0130954	0.00436513	Factor B	8	0.00562103	0.000702629	86.3471	2.22534	S		2	0.00582285	1	5
E2T7	0.00707478	0.00541866	0.00325858	0.015752	0.00525068	A*B	8	-0.00560176	-0.00070022	-86.0511	2.22534	NS		3	0.00445041	7	2
E2T8	0.005204	0.00474733	0.00401867	0.01397	0.00465666	Error	34	0.000234466	6.89606e-06					4	0.0054525	2	7
E2T9	0.00830566	0.00413086	0.00289247	0.015329	0.00510966	Total	53	0.000349147		t34=	2.03224			5	0.00462369	6	3
E1T1	0.00510898	0.00510924	0.000716237	0.0109345	0.00364482	SE.m	0.00151614							6	0.00431132	8	1
E1T2	0.006163	0.000298515	0.0113852	0.0178467	0.0059489	CD	0.00435743							7	0.00507016	4	6
E1T3	0.00639737	0.00068539	0.00649035	0.0135731	0.00452437	CV	54.182							8	0.00466171	5	4
E1T4	0.00853616	0.00763355	0.0012312	0.0174009	0.0058003									9	0.00523153	3	8
E1T5	0.00644128	0.00318755	0.00314009	0.0127689	0.00425631									SE.m	0.00107207
E1T6	0.00607948	0.00129559	0.00539746	0.0127725	0.00425751								Factor B	CD	0.00308117
E1T7	0.00792179	0.00113376	0.00561339	0.0146689	0.00488965
E1T8	0.00804479	0.00410595	0.00184954	0.0140003	0.00466676
E1T9	0.00706046	0.000752553	0.00824721	0.0160602	0.00535341
Total	0.119657	0.0626586	0.0794058	0.261721	0.00484669
Mean	0.00664761	0.00348103	0.00441143
CF	0.00126848
TSSQ	0.000349147	RSSQ	9.53599e-05
tSSQ	1.9321e-05	ESSQ	0.000234466
		2020
		RGR 30DAT
Main factors	2
Sub factors	9	Total factors	18
Replications	3
Treatments	R1	R2	R3	Total	Mean									Factors Mean
E2T1	0.0384626	0.0317868	0.0359673	0.106217	0.0354056				ANOVA					2	0.0300352	1	1
E2T2	0.0321382	0.0302292	0.0312919	0.0936593	0.0312198		df	SS	MSS	Cal F	Table F	Result		1	0.0298508	2	2
E2T3	0.0271003	0.0305425	0.031258	0.0889009	0.0296336	Replication	2	1.05666e-05	5.28328e-06	0.64927	3.2759	NS		SE.m	0.000489932
E2T4	0.02696	0.0273369	0.0285544	0.0828514	0.0276171	Treatment	17	0.000227954	1.3409e-05	1.64786	1.93321	NS	Factor A	CD	0.00140808
E2T5	0.0318497	0.0291701	0.0278357	0.0888555	0.0296185	Factor A	1	4.59436e-07	4.59436e-07	0.0564607	4.13002	NS		1	0.0339605	1	9
E2T6	0.0314437	0.0289166	0.0298687	0.090229	0.0300763	Factor B	8	0.220294	0.0275368	3384.04	2.22534	S		2	0.0313134	2	5
E2T7	0.0256281	0.0278368	0.0326914	0.0861564	0.0287188	A*B	8	-0.220067	-0.0275083	-3380.54	2.22534	NS		3	0.0297913	6	2
E2T8	0.0327286	0.0301705	0.0279389	0.0908379	0.0302793	Error	34	0.00022035	6.48089e-06					4	0.0274854	9	7
E2T9	0.0259586	0.0272981	0.0299875	0.0832442	0.0277481	Total	53	0.000458871		t34=	2.03224			5	0.0306603	4	3
E1T1	0.0394505	0.0312478	0.0268483	0.0975465	0.0325155	SE.m	0.0014698							6	0.0299014	5	1
E1T2	0.0316009	0.034349	0.0282715	0.0942214	0.0314071	CD	0.00422423							7	0.0279896	7	6
E1T3	0.029478	0.0295147	0.0308541	0.0898468	0.0299489	CV	8.50202							8	0.0306913	3	4
E1T4	0.0267701	0.0283505	0.0269402	0.0820607	0.0273536									9	0.0276937	8	8
E1T5	0.0351584	0.0301935	0.0297543	0.0951062	0.0317021									SE.m	0.0010393
E1T6	0.0311734	0.0290797	0.0289263	0.0891793	0.0297264								Factor B	CD	0.00298698
E1T7	0.0261381	0.025575	0.030068	0.0817811	0.0272604
E1T8	0.0309248	0.0310099	0.0313751	0.0933099	0.0311033
E1T9	0.0268471	0.0282991	0.0277721	0.0829183	0.0276394
Total	0.549811	0.530907	0.536204	1.61692	0.029943
Mean	0.0305451	0.0294948	0.0297891
CF	0.0484155
TSSQ	0.000458871	RSSQ	1.05666e-05
tSSQ	0.000227954	ESSQ	0.00022035
		60 DAT
Main factors	2
Sub factors	9	Total factors	18
Replications	3
Treatments	R1	R2	R3	Total	Mean									Factors Mean
E2T1	0.00956857	0.0101363	0.0130683	0.0327731	0.0109244				ANOVA					2	0.0119435	1	1
E2T2	0.0133937	0.0107594	0.00639912	0.0305522	0.0101841		df	SS	MSS	Cal F	Table F	Result		1	0.0116686	2	2
E2T3	0.0156202	0.0102411	0.00699657	0.0328578	0.0109526	Replication	2	2.86014e-06	1.43007e-06	0.175743	3.2759	NS		SE.m	0.000616103
E2T4	0.0111977	0.0137613	0.0166919	0.0416509	0.0138836	Treatment	17	0.000131644	7.74377e-06	0.951644	1.93321	NS	Factor A	CD	0.0017707
E2T5	0.00828445	0.0120916	0.0138553	0.0342314	0.0114105	Factor A	1	1.02e-06	1.02e-06	0.12535	4.13002	NS		1	0.0109678	6	9
E2T6	0.0125118	0.0124075	0.00829499	0.0332142	0.0110714	Factor B	8	0.0325358	0.00406698	499.798	2.22534	S		2	0.00978455	9	5
E2T7	0.0140698	0.0146593	0.0131702	0.0418993	0.0139664	A*B	8	-0.0324052	-0.00405065	-497.791	2.22534	NS		3	0.0111149	5	2
E2T8	0.0119086	0.0098736	0.0120758	0.033858	0.011286	Error	34	0.000348457	1.02487e-05					4	0.0138794	2	7
E2T9	0.0144341	0.017562	0.0094403	0.0414364	0.0138121	Total	53	0.000482961		t34=	2.03224			5	0.0108564	7	3
E1T1	0.00818031	0.0074042	0.0174492	0.0330338	0.0110113	SE.m	0.00184831							6	0.0106772	8	1
E1T2	0.00854748	0.00989066	0.00971689	0.028155	0.00938501	CD	0.00531209							7	0.0138782	3	6
E1T3	0.0156356	0.00845586	0.00974032	0.0338318	0.0112773	CV	27.1163							8	0.0111176	4	4
E1T4	0.011886	0.0113535	0.0183862	0.0416257	0.0138752									9	0.013978	1	8
E1T5	0.00488798	0.0122159	0.0138034	0.0309073	0.0103024									SE.m	0.00130695
E1T6	0.00942408	0.0129917	0.00843347	0.0308493	0.0102831								Factor B	CD	0.00375621
E1T7	0.0131568	0.0163329	0.0118802	0.0413699	0.01379
E1T8	0.0111579	0.0111587	0.010531	0.0328476	0.0109492
E1T9	0.0129742	0.0127682	0.0166893	0.0424317	0.0141439
Total	0.206839	0.214064	0.216622	0.637526	0.011806
Mean	0.0114911	0.0118924	0.0120346
CF	0.00752665
TSSQ	0.000482961	RSSQ	2.86014e-06
tSSQ	0.000131644	ESSQ	0.000348457
		90 DAT
Main factors	2
Sub factors	9	Total factors	18
Replications	3
Treatments	R1	R2	R3	Total	Mean									Factors Mean
E2T1	0.00287551	0.00468069	0.00432104	0.0118772	0.00395908				ANOVA					2	0.00515788	1
E2T2	0.00373591	0.00438343	0.00972202	0.0178414	0.00594712		df	SS	MSS	Cal F	Table F	Result		1	0.00506381	2
E2T3	0.00101887	0.00365085	0.00947835	0.0141481	0.00471602	Replication	2	6.61176e-05	3.30588e-05	4.06265	3.2759	S		SE.m	0.000703858
E2T4	0.0103521	0.00591046	0.00112861	0.0173912	0.00579706	Treatment	17	2.4543e-05	1.44371e-06	0.17742	1.93321	NS	Factor A	CD	0.00202291
E2T5	0.00688727	0.00467068	0.00331482	0.0148728	0.00495759	Factor A	1	1.1947e-07	1.1947e-07	0.0146818	4.13002	NS		1	0.0047858	6	9
E2T6	0.00715021	0.00336641	0.003783	0.0142996	0.00476654	Factor B	8	0.0062861	0.000785762	96.5636	2.22534	S		2	0.00609723	1	5
E2T7	0.0085915	0.00838106	-0.000989854	0.0159827	0.00532757	A*B	8	-0.00626168	-0.00078271	-96.1884	2.22534	NS		3	0.00439155	9	2
E2T8	0.00472311	0.00619261	0.00428361	0.0151993	0.00506644	Error	34	0.000454792	1.33762e-05					4	0.0058285	2	7
E2T9	0.00822226	0.00182103	0.00760716	0.0176504	0.00588348	Total	53	0.000545452		t34=	2.03224			5	0.0046259	7	3
E1T1	0.00629775	0.00924664	0.00129316	0.0168376	0.00561252	SE.m	0.00211157							6	0.0045936	8	1
E1T2	0.00602523	0.00128288	0.0114339	0.018742	0.00624733	CD	0.00606872							7	0.00542107	3	6
E1T3	0.000709593	0.00657932	0.00491234	0.0122013	0.00406708	CV	71.5607							8	0.00487271	5	4
E1T4	0.00823971	0.00968115	-0.000341046	0.0175798	0.00585994									9	0.00538121	4	8
E1T5	0.00694005	0.00516237	0.000780233	0.0128827	0.00429422									SE.m	0.00149311
E1T6	0.00961409	0.00085537	0.00279251	0.013262	0.00442066								Factor B	CD	0.00429123
E1T7	0.0101885	0.00442324	0.00193195	0.0165437	0.00551458
E1T8	0.00864066	0.00109348	0.00430282	0.014037	0.00467898
E1T9	0.00843967	0.00516647	0.0010307	0.0146368	0.00487894
Total	0.118652	0.0865481	0.0707853	0.275985	0.00511084
Mean	0.00659178	0.00480823	0.00393252
CF	0.00141052
TSSQ	0.000545452	RSSQ	6.61176e-05
tSSQ	2.4543e-05	ESSQ	0.000454792
