# Supplementary material for: Conservation tillage and fertiliser management strategies impact on basmati rice (Oryza sativa L): crop performance, crop water productivity, nutrient uptake and fertility status of the soil under rice-wheat cropping system
Source: PeerJ. 2023 Nov 1;11:e16271. doi: 10.7717/peerj.16271 (PMC10625351; doi:10.7717/peerj.16271)
Supplement: Supplemental Information 3 [file peerj-11-16271-s003.xlsx]

## Sheet: Plant height 
		2019
		PLANT HEIGHT 30DAT
Main factors	2
Sub factors	9	Total factors	18
Replications	3
Treatments	R1	R2	R3	Total	Mean									Factors Mean
E1T1	25.6	33.6	27.6	86.8	28.9333				ANOVA					1	36.5593	1	1
E1T2	36.8	37.6	33.8	108.2	36.0667		df	SS	MSS	Cal F	Table F	Result		2	34.9815	2	2
E1T3	38.6	41.6	40.6	120.8	40.2667	Replication	2	73.397	36.6985	5.67057	3.2759	S		SE.m	0.477051
E1T4	32.9	36.5	34.2	103.6	34.5333	Treatment	17	807.179	47.4811	7.33667	1.93321	S	Factor A	CD	1.37106
E1T5	38.2	44.1	38.4	120.7	40.2333	Factor A	1	33.6067	33.6067	5.19282	4.13002	S		1	28.65	9	9
E1T6	37.6	42.1	44.8	124.5	41.5	Factor B	8	317609	39701.1	6134.52	2.22534	S		2	35.6167	5	5
E1T7	35.6	38.6	33.2	107.4	35.8	A*B	8	-316835	-39604.4	-6119.57	2.22534	NS		3	39.95	2	2
E1T8	36.9	40.8	35.2	112.9	37.6333	Error	34	208.916	6.1446					4	33.1333	7	7
E1T9	33.6	37	31.6	102.2	34.0667	Total	53	1089.49		t34=	2.03224			5	39.0833	3	3
E2T1	32.1	30.5	22.5	85.1	28.3667	SE.m	1.43115							6	41.3	1	1
E2T2	35.2	36.5	33.8	105.5	35.1667	CD	4.11317							7	34.6333	6	6
E2T3	39.8	38.2	40.9	118.9	39.6333	CV	6.92984							8	36.6833	4	4
E2T4	31.6	32.8	30.8	95.2	31.7333									9	32.8833	8	8
E2T5	42.1	38.6	33.1	113.8	37.9333									SE.m	1.01198
E2T6	44.5	40.2	38.6	123.3	41.1								Factor B	CD	2.90845
E2T7	32.8	34.1	33.5	100.4	33.4667
E2T8	37.5	36.1	33.6	107.2	35.7333
E2T9	32.8	30.5	31.8	95.1	31.7
Total	644.2	669.4	618	1931.6	35.7704
Mean	35.7889	37.1889	34.3333
CF	69094
TSSQ	1089.49	RSSQ	73.397
tSSQ	807.179	ESSQ	208.916
		PLANT HEIGHT 60 DAT
Main factors	2
Sub factors	9	Total factors	18
Replications	3
Treatments	R1	R2	R3	Total	Mean									Factors Mean
E1T1	65.5	58.9	65.5	189.9	63.3				ANOVA					1	70.9481	1	1
E1T2	71.6	71.8	72.1	215.5	71.8333		df	SS	MSS	Cal F	Table F	Result		2	69.263	2	2
E1T3	75.1	74.8	75.8	225.7	75.2333	Replication	2	72.6433	36.3217	5.61234	3.2759	S		SE.m	0.562993
E1T4	70.4	68.2	66.2	204.8	68.2667	Treatment	17	1009.56	59.3856	9.17612	1.93321	S	Factor A	CD	1.61806
E1T5	74.8	71.5	76.1	222.4	74.1333	Factor A	1	38.338	38.338	5.92389	4.13002	S		1	62.3333	9	9
E1T6	80.2	79.6	71.2	231	77	Factor B	8	1.20239e+06	150298	23223.7	2.22534	S		2	71.1167	5	5
E1T7	70.5	67.8	68.6	206.9	68.9667	A*B	8	-1.20141e+06	-150177	-23205	2.22534	NS		3	74.1	2	2
E1T8	72.8	72.4	73.8	219	73	Error	34	290.97	8.55794					4	67.1333	7	7
E1T9	65.8	66.8	67.8	200.4	66.8	Total	53	1373.17		t34=	2.03224			5	73.7667	3	3
E2T1	66.5	66.8	50.8	184.1	61.3667	SE.m	1.68898							6	76.0167	1	1
E2T2	70.8	69.8	70.6	211.2	70.4	CD	4.85417							7	68.1167	6	6
E2T3	76	71.5	71.4	218.9	72.9667	CV	4.17284							8	72.4333	4	4
E2T4	67.6	67.2	63.2	198	66									9	65.9333	8	8
E2T5	75.6	73.8	70.8	220.2	73.4									SE.m	1.19429
E2T6	76.4	75.9	72.8	225.1	75.0333								Factor B	CD	3.43242
E2T7	69.2	64.8	67.8	201.8	67.2667
E2T8	71.6	70.8	73.2	215.6	71.8667
E2T9	69.2	64.5	61.5	195.2	65.0667
Total	1289.6	1256.9	1239.2	3785.7	70.1056
Mean	71.6444	69.8278	68.8444
CF	265399
TSSQ	1373.17	RSSQ	72.6433
tSSQ	1009.56	ESSQ	290.97
		PLANT HEIGHT 90 DAT
Main factors	2
Sub factors	9	Total factors	18
Replications	3
Treatments	R1	R2	R3	Total	Mean									Factors Mean
E1T1	84.2	79.8	75.6	239.6	79.8667				ANOVA					1	89.3926	1
E1T2	90.8	91.8	90.2	272.8	90.9333		df	SS	MSS	Cal F	Table F	Result		2	87.5704	2
E1T3	96.5	93.1	91.2	280.8	93.6	Replication	2	46.9804	23.4902	3.62965	3.2759	S		SE.m	0.592319
E1T4	86.8	86.9	87.1	260.8	86.9333	Treatment	17	1222.29	71.8993	11.1097	1.93321	S	Factor A	CD	1.70234
E1T5	91.8	93.4	93.2	278.4	92.8	Factor A	1	44.8267	44.8267	6.92651	4.13002	S		1	78.9667	9	9
E1T6	95.6	94.6	94.2	284.4	94.8	Factor B	8	1.90904e+06	238630	36872.6	2.22534	S		2	90.0333	5	5
E1T7	90.2	89.6	88.8	268.6	89.5333	A*B	8	-1.90786e+06	-238483	-36849.8	2.22534	NS		3	92.9833	2	2
E1T8	90.5	90.4	92.4	273.3	91.1	Error	34	322.073	9.47273					4	85.7333	7	7
E1T9	84.3	85.8	84.8	254.9	84.9667	Total	53	1591.34		t34=	2.03224			5	92.1833	3	3
E2T1	85.6	82.1	66.5	234.2	78.0667	SE.m	1.77696							6	94.2167	1	1
E2T2	91.6	85.6	90.2	267.4	89.1333	CD	5.10703							7	87.3833	6	6
E2T3	92.2	93.1	91.8	277.1	92.3667	CV	3.47845							8	90.8167	4	4
E2T4	81.5	84.2	87.9	253.6	84.5333									9	84.0167	8	8
E2T5	95.8	92.1	86.8	274.7	91.5667									SE.m	1.2565
E2T6	95.6	94.8	90.5	280.9	93.6333								Factor B	CD	3.61121
E2T7	85.4	83.8	86.5	255.7	85.2333
E2T8	91.2	89.8	90.6	271.6	90.5333
E2T9	83.2	82.6	83.4	249.2	83.0667
Total	1612.8	1593.5	1571.7	4778	88.4815
Mean	89.6	88.5278	87.3167
CF	422765
TSSQ	1591.34	RSSQ	46.9804
tSSQ	1222.29	ESSQ	322.073
		PLANT HEIGHT AT HARVEST
Main factors	2
Sub factors	9	Total factors	18
Replications	3
Treatments	R1	R2	R3	Total	Mean									Factors Mean
E1T1	84.3	82.8	76.5	243.6	81.2				ANOVA					1	91.6778	1
E1T2	94.5	93.2	88.7	276.4	92.1333		df	SS	MSS	Cal F	Table F	Result		2	90.0259	2
E1T3	98.9	98.4	92.8	290.1	96.7	Replication	2	268.534	134.267	20.7466	3.2759	S		SE.m	0.617283
E1T4	94.5	90.4	82.5	267.4	89.1333	Treatment	17	1500.51	88.2652	13.6385	1.93321	S	Factor A	CD	1.77409
E1T5	95.4	95.8	94.6	285.8	95.2667	Factor A	1	36.8363	36.8363	5.69186	4.13002	S		1	80.9167	9	9
E1T6	105.6	98.2	91.6	295.4	98.4667	Factor B	8	2.0137e+06	251712	38894	2.22534	S		2	91.1	5	5
E1T7	89.8	91.6	90.4	271.8	90.6	A*B	8	-2.01223e+06	-251529	-38865.7	2.22534	NS		3	96.15	2	2
E1T8	92.9	97.5	89.8	280.2	93.4	Error	34	349.793	10.288					4	87.9833	7	7
E1T9	85.8	88.4	90.4	264.6	88.2	Total	53	2118.83		t34=	2.03224			5	95.2833	3	3
E2T1	83.1	81.2	77.6	241.9	80.6333	SE.m	1.85185							6	98.15	1	1
E2T2	90.6	89.8	89.8	270.2	90.0667	CD	5.32226							7	88.55	6	6
E2T3	95.8	94.8	96.2	286.8	95.6	CV	3.53047							8	93.2167	4	4
E2T4	94.1	85.6	80.8	260.5	86.8333									9	86.3167	8	8
E2T5	94.6	98.1	93.2	285.9	95.3									SE.m	1.30945
E2T6	103.4	96.6	93.5	293.5	97.8333								Factor B	CD	3.76341
E2T7	89.2	88.7	81.6	259.5	86.5
E2T8	98.7	86.9	93.5	279.1	93.0333
E2T9	89.5	84.2	79.6	253.3	84.4333
Total	1680.7	1642.2	1583.1	4906	90.8519
Mean	93.3722	91.2333	87.95
CF	445719
TSSQ	2118.83	RSSQ	268.534
tSSQ	1500.51	ESSQ	349.793
		2020
		PLANT HEIGHT 30DAT
Main factors	2
Sub factors	9	Total factors	18
Replications	3
Treatments	R1	R2	R3	Total	Mean									Factors Mean
E1T1	26.6	35.1	28.1	89.8	29.9333				ANOVA					1	37.1889	1
E1T2	36	40.7	33.9	110.6	36.8667		df	SS	MSS	Cal F	Table F	Result		2	35.637	2
E1T3	39.8	43.7	39.3	122.8	40.9333	Replication	2	80.947	40.4735	6.25387	3.2759	S		SE.m	0.489586
E1T4	33.9	38.4	32.9	105.2	35.0667	Treatment	17	838.494	49.3232	7.6213	1.93321	S	Factor A	CD	1.40708
E1T5	39	46.5	37.2	122.7	40.9	Factor A	1	32.5113	32.5113	5.02357	4.13002	S		1	29	9
E1T6	37.8	41.9	48	127.7	42.5667	Factor B	8	329306	41163.2	6360.44	2.22534	S		2	36.15	5
E1T7	35.3	39.4	33.7	108.4	36.1333	A*B	8	-328500	-41062.5	-6344.87	2.22534	NS		3	40.9167	2
E1T8	36.9	41	35.4	113.3	37.7667	Error	34	220.04	6.47175					4	34.1167	7
E1T9	33.2	37.2	33.2	103.6	34.5333	Total	53	1139.48		t34=	2.03224			5	39.4167	3
E2T1	25.6	28.4	30.2	84.2	28.0667	SE.m	1.46876							6	42.0167	1
E2T2	36.5	35.2	34.6	106.3	35.4333	CD	4.22125							7	35.2	6
E2T3	41.3	39.6	41.8	122.7	40.9	CV	6.98642							8	37.5	4
E2T4	33.8	32.6	33.1	99.5	33.1667									9	33.4	8
E2T5	36.8	42.8	34.2	113.8	37.9333									SE.m	1.03857
E2T6	41.5	40.6	42.3	124.4	41.4667								Factor B	CD	2.98488
E2T7	35.2	34.2	33.4	102.8	34.2667
E2T8	38.4	37.2	36.1	111.7	37.2333
E2T9	32.3	32.1	32.4	96.8	32.2667
Total	639.9	686.6	639.8	1966.3	36.413
Mean	35.55	38.1444	35.5444
CF	71598.8
TSSQ	1139.48	RSSQ	80.947
tSSQ	838.494	ESSQ	220.04
		PLANT HEIGHT 60 DAT
Main factors	2
Sub factors	9	Total factors	18
Replications	3
Treatments	R1	R2	R3	Total	Mean									Factors Mean
E1T1	64.5	72.1	61.5	198.1	66.0333				ANOVA					1	72	1
E1T2	73.6	68.6	74.6	216.8	72.2667		df	SS	MSS	Cal F	Table F	Result		2	70.3444	2
E1T3	75.3	73.6	78.4	227.3	75.7667	Replication	2	34.93	17.465	2.69865	3.2759	NS		SE.m	0.57817
E1T4	68.5	67.1	71.5	207.1	69.0333	Treatment	17	896.428	52.7311	8.14788	1.93321	S	Factor A	CD	1.66168
E1T5	74.9	72.8	77.6	225.3	75.1	Factor A	1	37.0017	37.0017	5.71741	4.13002	S		1	64.7833	9	9
E1T6	78.6	75.3	80.6	234.5	78.1667	Factor B	8	1.24005e+06	155007	23951.3	2.22534	S		2	71.6333	5	5
E1T7	70.3	69.2	72.5	212	70.6667	A*B	8	-1.23919e+06	-154899	-23934.7	2.22534	NS		3	75.6333	2	2
E1T8	73.2	72.2	76.2	221.6	73.8667	Error	34	306.87	9.02559					4	68.2833	7	7
E1T9	65.4	66.2	69.7	201.3	67.1	Total	53	1238.23		t34=	2.03224			5	74.4667	3	3
E2T1	57.4	63.4	69.8	190.6	63.5333	SE.m	1.73451							6	76.8667	1	1
E2T2	71.2	70.3	71.5	213	71	CD	4.98503							7	69.2333	6	6
E2T3	74.3	75.8	76.4	226.5	75.5	CV	4.22112							8	73.1333	4	4
E2T4	67.5	68.4	66.7	202.6	67.5333									9	66.5167	8	8
E2T5	73.5	72.2	75.8	221.5	73.8333									SE.m	1.22648
E2T6	71.6	82.5	72.6	226.7	75.5667								Factor B	CD	3.52495
E2T7	66.4	71.6	65.4	203.4	67.8
E2T8	72.5	71.2	73.5	217.2	72.4
E2T9	65.3	67.4	65.1	197.8	65.9333
Total	1264	1279.9	1299.4	3843.3	71.1722
Mean	70.2222	71.1056	72.1889
CF	273536
TSSQ	1238.23	RSSQ	34.93
tSSQ	896.428	ESSQ	306.87
		PLANT HEIGHT 90 DAT
Main factors	2
Sub factors	9	Total factors	18
Replications	3
Treatments	R1	R2	R3	Total	Mean									Factors Mean
E1T1	74.5	78.9	84.2	237.6	79.2				ANOVA					1	90.1519	1
E1T2	92.1	92.5	89.1	273.7	91.2333		df	SS	MSS	Cal F	Table F	Result		2	88.3852	2
E1T3	96.5	94.3	92.8	283.6	94.5333	Replication	2	49.3115	24.6557	3.80975	3.2759	S		SE.m	0.621196
E1T4	89.2	90.6	87.2	267	89	Treatment	17	1344.4	79.0825	12.2196	1.93321	S	Factor A	CD	1.78533
E1T5	94.3	94.1	91.2	279.6	93.2	Factor A	1	42.135	42.135	6.5106	4.13002	S		1	78.1167	9	9
E1T6	99.5	97.8	93.2	290.5	96.8333	Factor B	8	1.93661e+06	242077	37405.1	2.22534	S		2	90.3	5	5
E1T7	90.5	91.3	88.5	270.3	90.1	A*B	8	-1.93531e+06	-241914	-37379.9	2.22534	NS		3	93.1833	2	2
E1T8	92.9	93.1	89.2	275.2	91.7333	Error	34	354.242	10.4189					4	87.1	7	7
E1T9	85.5	87.6	83.5	256.6	85.5333	Total	53	1747.96		t34=	2.03224			5	92.5667	3	3
E2T1	76.1	75.4	79.6	231.1	77.0333	SE.m	1.86359							6	95.8167	1	1
E2T2	89.2	90.4	88.5	268.1	89.3667	CD	5.356							7	88.9	6	6
E2T3	87.5	97.6	90.4	275.5	91.8333	CV	3.61586							8	91.2833	4	4
E2T4	89.8	81.6	84.2	255.6	85.2									9	86.15	8	8
E2T5	90.8	94.5	90.5	275.8	91.9333									SE.m	1.31776
E2T6	99.1	97.2	88.1	284.4	94.8								Factor B	CD	3.78727
E2T7	87.3	89.4	86.4	263.1	87.7
E2T8	91.5	91.3	89.7	272.5	90.8333
E2T9	78.6	91.2	90.5	260.3	86.7667
Total	1604.9	1628.8	1586.8	4820.5	89.2685
Mean	89.1611	90.4889	88.1556
CF	430319
TSSQ	1747.96	RSSQ	49.3115
tSSQ	1344.4	ESSQ	354.242
		PLANT HEIGHT AT HARVEST
Main factors	2
Sub factors	9	Total factors	18
Replications	3
Treatments	R1	R2	R3	Total	Mean									Factors Mean
E1T1	73.5	89.8	84.3	247.6	82.5333				ANOVA					1	92.3741	1
E1T2	92.5	94.6	91.2	278.3	92.7667		df	SS	MSS	Cal F	Table F	Result		2	90.5037	2
E1T3	99.7	97.8	93.8	291.3	97.1	Replication	2	92.3544	46.1772	7.13519	3.2759	S		SE.m	0.634638
E1T4	88.6	90.2	89.8	268.6	89.5333	Treatment	17	1452.51	85.4421	13.2023	1.93321	S	Factor A	CD	1.82397
E1T5	97.2	96.4	92.8	286.4	95.4667	Factor A	1	47.2269	47.2269	7.29738	4.13002	S		1	81.75	9	9
E1T6	102.8	98.2	95.3	296.3	98.7667	Factor B	8	2.04313e+06	255391	39462.4	2.22534	S		2	92.3833	5	5
E1T7	93.7	91.5	90.4	275.6	91.8667	A*B	8	-2.04172e+06	-255216	-39435.3	2.22534	NS		3	96.8833	2	2
E1T8	95.3	95.7	92.7	283.7	94.5667	Error	34	369.739	10.8747					4	88.4333	7	7
E1T9	88.4	87.5	90.4	266.3	88.7667	Total	53	1914.61		t34=	2.03224			5	95.8667	3	3
E2T1	79.8	87.3	75.8	242.9	80.9667	SE.m	1.90391							6	97.8167	1	1
E2T2	95.6	87.6	92.8	276	92	CD	5.4719							7	90.1333	6	6
E2T3	97.5	96.8	95.7	290	96.6667	CV	3.60643							8	93.55	4	4
E2T4	93.9	85.3	82.8	262	87.3333									9	86.1333	8	8
E2T5	99.2	96.8	92.8	288.8	96.2667									SE.m	1.34627
E2T6	99.9	98.5	92.2	290.6	96.8667								Factor B	CD	3.86922
E2T7	90.2	88.5	86.5	265.2	88.4
E2T8	92.3	93.6	91.7	277.6	92.5333
E2T9	86.1	82.5	81.9	250.5	83.5
Total	1666.2	1658.6	1612.9	4937.7	91.4389
Mean	92.5667	92.1444	89.6056
CF	451498
TSSQ	1914.61	RSSQ	92.3544
tSSQ	1452.51	ESSQ	369.739

## Sheet: No. of tillers
		2019
		No. of tillers 30DAT
Main factors	2
Sub factors	9	Total factors	18
Replications	3
Treatments	R1	R2	R3	Total	Mean									Factors Mean
E1T1	220	232	225	677	225.667				ANOVA					1	264.074	2	2
E1T2	264	277	258	799	266.333		df	SS	MSS	Cal F	Table F	Result		2	268.889	1	1
E1T3	286	275	288	849	283	Replication	2	701.815	350.907	4.01967	3.2759	S		SE.m	1.79309
E1T4	252	265	264	781	260.333	Treatment	17	15704.1	923.773	10.5819	1.93321	S	Factor A	CD	5.15338
E1T5	264	285	280	829	276.333	Factor A	1	312.963	312.963	3.58502	4.13002	NS		1	227.5	9	9
E1T6	289	272	298	859	286.333	Factor B	8	1.72678e+07	2.15848e+06	24725.6	2.22534	S		2	268.5	5	5
E1T7	261	260	264	785	261.667	A*B	8	-1.72525e+07	-2.15656e+06	-24703.5	2.22534	NS		3	284.167	2	2
E1T8	272	266	254	792	264	Error	34	2951.52	86.8094					4	261.833	7	7
E1T9	250	253	256	759	253	Total	53	19357.5		t34=	2.03224			5	276.167	3	3
E2T1	218	228	242	688	229.333	SE.m	5.37926							6	288.833	1	1
E2T2	265	271	276	812	270.667	CD	15.4601							7	263.833	6	6
E2T3	278	286	292	856	285.333	CV	3.49636							8	269.5	4	4
E2T4	261	266	263	790	263.333									9	258	8	8
E2T5	270	276	282	828	276									SE.m	3.80371
E2T6	261	292	321	874	291.333								Factor B	CD	10.932
E2T7	265	269	264	798	266
E2T8	275	278	272	825	275
E2T9	258	266	265	789	263
Total	4709	4817	4864	14390	266.481
Mean	261.611	267.611	270.222
CF	3.83467e+06
TSSQ	19357.5	RSSQ	701.815
tSSQ	15704.1	ESSQ	2951.52
		60 DAT
Main factors	2
Sub factors	9	Total factors	18
Replications	3
Treatments	R1	R2	R3	Total	Mean									Factors Mean
E1T1	215	244	282	741	247				ANOVA					1	401.963	2	1
E1T2	405	424	418	1247	415.667		df	SS	MSS	Cal F	Table F	Result		2	407.926	1	2
E1T3	442	426	421	1289	429.667	Replication	2	2359	1179.5	13.5113	3.2759	S		SE.m	2.32952
E1T4	405	412	421	1238	412.667	Treatment	17	163832	9637.19	110.395	1.93321	S	Factor A	CD	6.6951
E1T5	402	426	448	1276	425.333	Factor A	1	480.019	480.019	5.49865	4.13002	S		1	251	9	9
E1T6	425	438	448	1311	437	Factor B	8	4.00961e+07	5.01201e+06	57413	2.22534	S		2	419.5	5	5
E1T7	414	412	418	1244	414.667	A*B	8	-3.99327e+07	-4.99159e+06	-57179.1	2.22534	NS		3	433.5	2	2
E1T8	432	419	420	1271	423.667	Error	34	4981.67	146.52					4	415.333	7	7
E1T9	396	412	428	1236	412	Total	53	171173		t34=	2.03224			5	428.5	3	3
E2T1	231	252	282	765	255	SE.m	6.98855							6	438.667	1	1
E2T2	415	426	429	1270	423.333	CD	20.0853							7	417.167	6	6
E2T3	438	440	434	1312	437.333	CV	2.98918							8	426.167	4	4
E2T4	416	420	418	1254	418									9	414.667	8	8
E2T5	412	429	454	1295	431.667									SE.m	4.94165
E2T6	432	438	451	1321	440.333								Factor B	CD	14.2024
E2T7	420	418	421	1259	419.667
E2T8	432	428	426	1286	428.667
E2T9	416	416	420	1252	417.333
Total	7148	7280	7439	21867	404.944
Mean	397.111	404.444	413.278
CF	8.85492e+06
TSSQ	171173	RSSQ	2359
tSSQ	163832	ESSQ	4981.67
		90 DAT
Main factors	2
Sub factors	9	Total factors	18
Replications	3
Treatments	R1	R2	R3	Total	Mean									Factors Mean
E1T1	206.75	231	256.75	694.5	231.5				ANOVA					1	373.667	2
E1T2	386.75	392.75	388.75	1168.25	389.417		df	SS	MSS	Cal F	Table F	Result		2	379.778	1
E1T3	408.75	406.75	398.75	1214.25	404.75	Replication	2	635.007	317.503	3.63703	3.2759	S		SE.m	2.0991
E1T4	380.75	376.75	384.75	1142.25	380.75	Treatment	17	142636	8390.35	96.1122	1.93321	S	Factor A	CD	6.03287
E1T5	392.75	406.75	397.75	1197.25	399.083	Factor A	1	504.167	504.167	5.77527	4.13002	S		1	234.75	9	9
E1T6	392.75	414.75	421.75	1229.25	409.75	Factor B	8	3.48623e+07	4.35779e+06	49918.9	2.22534	S		2	390.875	5	5
E1T7	380.75	378.75	386.75	1146.25	382.083	A*B	8	-3.47202e+07	-4.34003e+06	-49715.4	2.22534	NS		3	406.875	2	2
E1T8	390.75	389.75	396.75	1177.25	392.417	Error	34	4044.91	118.968					4	383.208	7	7
E1T9	364.75	367	388	1119.75	373.25	Total	53	147316		t34=	2.03224			5	402.208	3	3
E2T1	211	237	266	714	238	SE.m	6.2973							6	412.042	1	1
E2T2	401	385	391	1177	392.333	CD	18.0986							7	384.875	6	6
E2T3	409	407	411	1227	409	CV	2.8953							8	396.708	4	4
E2T4	383	389	385	1157	385.667									9	378.958	8	8
E2T5	403	409	404	1216	405.333									SE.m	4.45286
E2T6	430	413	400	1243	414.333								Factor B	CD	12.7977
E2T7	385	383	395	1163	387.667
E2T8	399	395	409	1203	401
E2T9	385	389	380	1154	384.667
Total	6710.75	6771.25	6861	20343	376.722
Mean	372.819	376.181	381.167
CF	7.66366e+06
TSSQ	147316	RSSQ	635.007
tSSQ	142636	ESSQ	4044.91
		AT HARVEST
Main factors	2
Sub factors	9	Total factors	18
Replications	3
Treatments	R1	R2	R3	Total	Mean									Factors Mean
E1T1	206	205	242	653	217.667				ANOVA					1	358.556	2
E1T2	360	372	381	1113	371		df	SS	MSS	Cal F	Table F	Result		2	363.519	1
E1T3	386	388	394	1168	389.333	Replication	2	1007.72	503.862	5.77179	3.2759	S		SE.m	1.95434
E1T4	366	370	362	1098	366	Treatment	17	142144	8361.41	95.7807	1.93321	S	Factor A	CD	5.61681
E1T5	384	380	382	1146	382	Factor A	1	332.519	332.519	3.80903	4.13002	NS		1	219.083	9	9
E1T6	378	402	410	1190	396.667	Factor B	8	3.20576e+07	4.0072e+06	45902.8	2.22534	S		2	374.167	5	5
E1T7	368	372	364	1104	368	A*B	8	-3.19158e+07	-3.98947e+06	-45699.7	2.22534	NS		3	391.542	2	2
E1T8	368	374	385	1127	375.667	Error	34	3506.23	103.125					4	368.292	7	7
E1T9	338	372	372	1082	360.667	Total	53	146658		t34=	2.03224			5	385.792	3	3
E2T1	205.25	214.25	242	661.5	220.5	SE.m	5.86301							6	396.833	1	1
E2T2	379	365	388	1132	377.333	CD	16.8504							7	369.792	6	6
E2T3	405	385	391.25	1181.25	393.75	CV	2.81274							8	379.292	4	4
E2T4	373.25	367.25	371.25	1111.75	370.583									9	364.542	8	8
E2T5	387.25	393.25	388.25	1168.75	389.583									SE.m	4.14577
E2T6	379	406	406	1191	397								Factor B	CD	11.9151
E2T7	374.25	371.25	369.25	1114.75	371.583
E2T8	387.25	377.25	384.25	1148.75	382.917
E2T9	366	372	367.25	1105.25	368.417
Total	6410.25	6486.25	6599.5	19496	361.037
Mean	356.125	360.347	366.639
CF	7.03878e+06
TSSQ	146658	RSSQ	1007.72
tSSQ	142144	ESSQ	3506.23
		2020
		No. of tillers 30DAT
Main factors	2
Sub factors	9	Total factors	18
Replications	3
Treatments	R1	R2	R3	Total	Mean									Factors Mean
E1T1	207.8	232.8	259.8	700.4	233.467				ANOVA					1	266.844	2
E1T2	263.8	268.8	270.8	803.4	267.8		df	SS	MSS	Cal F	Table F	Result		2	271.054	1
E1T3	277.8	283.8	298	859.6	286.533	Replication	2	2813.11	1406.56	16.1122	3.2759	S		SE.m	1.79812
E1T4	253.8	257.8	261.8	773.4	257.8	Treatment	17	15821	930.646	10.6606	1.93321	S	Factor A	CD	5.16785
E1T5	274.8	277.8	281.8	834.4	278.133	Factor A	1	239.191	239.191	2.73996	4.13002	NS		1	233.908	9	9
E1T6	265.8	272.8	327.8	866.4	288.8	Factor B	8	1.7648e+07	2.206e+06	25269.9	2.22534	S		2	268.408	5	5
E1T7	258.8	262.8	266.8	788.4	262.8	A*B	8	-1.76324e+07	-2.20405e+06	-25247.6	2.22534	NS		3	287.775	2	2
E1T8	267.8	272.8	277.8	818.4	272.8	Error	34	2968.11	87.2975					4	260.908	7	7
E1T9	248.8	253.8	257.8	760.4	253.467	Total	53	21602.2		t34=	2.03224			5	279.408	3	3
E2T1	209.35	234.35	259.35	703.05	234.35	SE.m	5.39436							6	293.908	1	1
E2T2	264.35	266.35	276.35	807.05	269.017	CD	15.5036							7	265.075	6	6
E2T3	284.35	289.35	293.35	867.05	289.017	CV	3.47401							8	274.575	4	4
E2T4	259.35	263.35	269.35	792.05	264.017									9	256.575	8	8
E2T5	274.35	281.35	286.35	842.05	280.683									SE.m	3.81439
E2T6	294.35	299.35	303.35	897.05	299.017								Factor B	CD	10.9627
E2T7	262.35	266.35	273.35	802.05	267.35
E2T8	271.35	277.35	280.35	829.05	276.35
E2T9	254.35	259.35	265.35	779.05	259.683
Total	4693.35	4820.35	5009.55	14523.2	268.949
Mean	260.742	267.797	278.308
CF	3.90601e+06
TSSQ	21602.2	RSSQ	2813.11
tSSQ	15821	ESSQ	2968.11
		60 DAT
Main factors	2
Sub factors	9	Total factors	18
Replications	3
Treatments	R1	R2	R3	Total	Mean									Factors Mean
E1T1	225	242	282	749	249.667				ANOVA					1	406.185	2
E1T2	426	425	420	1271	423.667		df	SS	MSS	Cal F	Table F	Result		2	412.185	1
E1T3	438	435	431	1304	434.667	Replication	2	150.926	75.463	0.864435	3.2759	NS		SE.m	2.36619
E1T4	419	420	415	1254	418	Treatment	17	165459	9732.91	111.491	1.93321	S	Factor A	CD	6.80049
E1T5	426	431	428	1285	428.333	Factor A	1	486	486	5.56717	4.13002	S		1	254.333	9	9
E1T6	442	440	435	1317	439	Factor B	8	4.09547e+07	5.11933e+06	58642.4	2.22534	S		2	425.833	5	5
E1T7	420	422	418	1260	420	A*B	8	-4.07897e+07	-5.09871e+06	-58406.2	2.22534	NS		3	437.167	2	2
E1T8	431	428	425	1284	428	Error	34	5139.74	151.169					4	420.667	7	7
E1T9	425	408	410	1243	414.333	Total	53	170750		t34=	2.03224			5	431.333	3	3
E2T1	232	251	294	777	259	SE.m	7.09856							6	443	1	1
E2T2	431	428	425	1284	428	CD	20.4015							7	422.333	6	6
E2T3	443	441	435	1319	439.667	CV	3.00477							8	430	4	4
E2T4	427	423	420	1270	423.333									9	418	8	8
E2T5	439	436	428	1303	434.333									SE.m	5.01944
E2T6	425	445	471	1341	447								Factor B	CD	14.426
E2T7	428	425	421	1274	424.667
E2T8	435	431	430	1296	432
E2T9	425	421	419	1265	421.667
Total	7337	7352	7407	22096	409.185
Mean	407.611	408.444	411.5
CF	9.04136e+06
TSSQ	170750	RSSQ	150.926
tSSQ	165459	ESSQ	5139.74
		90 DAT
Main factors	2
Sub factors	9	Total factors	18
Replications	3
Treatments	R1	R2	R3	Total	Mean									Factors Mean
E1T1	205	221	262	688	229.333				ANOVA					1	375.148	2
E1T2	392	390	388	1170	390		df	SS	MSS	Cal F	Table F	Result		2	380.933	1
E1T3	410	407	401	1218	406	Replication	2	4.01926	2.00963	0.0230205	3.2759	NS		SE.m	2.13427
E1T4	385	381	379	1145	381.667	Treatment	17	149886	8816.8	100.997	1.93321	S	Factor A	CD	6.13394
E1T5	403	402	396	1201	400.333	Factor A	1	451.823	451.823	5.17567	4.13002	S		1	232.033	9	9
E1T6	428	410	394	1232	410.667	Factor B	8	3.50644e+07	4.38305e+06	50208.2	2.22534	S		2	391.967	5	5
E1T7	387	382	380	1149	383	A*B	8	-3.4915e+07	-4.36437e+06	-49994.2	2.22534	NS		3	408.367	2	2
E1T8	396	394	392	1182	394	Error	34	4181.58	122.988					4	384.8	7	7
E1T9	392	380	372	1144	381.333	Total	53	154071		t34=	2.03224			5	403.867	3	3
E2T1	214.6	229.6	260	704.2	234.733	SE.m	6.4028							6	413.533	1	1
E2T2	398.6	393.6	389.6	1181.8	393.933	CD	18.4018							7	385.867	6	6
E2T3	411	411.6	409.6	1232.2	410.733	CV	2.93354							8	398.133	4	4
E2T4	387.6	391.6	384.6	1163.8	387.933									9	383.8	8	8
E2T5	409.6	407.6	405	1222.2	407.4									SE.m	4.52747
E2T6	404.6	414.6	430	1249.2	416.4								Factor B	CD	13.0121
E2T7	388	393.6	384.6	1166.2	388.733
E2T8	404.6	401.6	400.6	1206.8	402.267
E2T9	385.6	389.6	383.6	1158.8	386.267
Total	6802.2	6800.4	6811.6	20414.2	378.041
Mean	377.9	377.8	378.422
CF	7.7174e+06
TSSQ	154071	RSSQ	4.01926
tSSQ	149886	ESSQ	4181.58
		AT HARVEST
Main factors	2
Sub factors	9	Total factors	18
Replications	3
Treatments	R1	R2	R3	Total	Mean									Factors Mean
E1T1	205	217	232	654	218				ANOVA					1	360.556	2
E1T2	371	374	368	1113	371		df	SS	MSS	Cal F	Table F	Result		2	365.948	1
E1T3	392	390	391	1173	391	Replication	2	226.624	113.312	1.298	3.2759	NS		SE.m	2.05097
E1T4	363	384	353	1100	366.667	Treatment	17	144713	8512.51	97.5115	1.93321	S	Factor A	CD	5.89454
E1T5	385	388	381	1154	384.667	Factor A	1	392.581	392.581	4.49705	4.13002	S		1	219.733	9	9
E1T6	372	400	412	1184	394.667	Factor B	8	3.23699e+07	4.04624e+06	46350.1	2.22534	S		2	373.167	5	5
E1T7	371	374	369	1114	371.333	A*B	8	-3.22256e+07	-4.0282e+06	-46143.4	2.22534	NS		3	393.467	2	2
E1T8	381	383	376	1140	380	Error	34	3861.54	113.575					4	370.7	7	7
E1T9	367	370	366	1103	367.667	Total	53	148801		t34=	2.03224			5	388.367	3	3
E2T1	199.4	210	255	664.4	221.467	SE.m	6.1529							6	397.967	1	1
E2T2	381	368	377	1126	375.333	CD	17.6836							7	371.467	6	6
E2T3	398	393.4	396.4	1187.8	395.933	CV	2.93382							8	383.7	4	4
E2T4	377.4	366.4	380.4	1124.2	374.733									9	370.7	7	8
E2T5	393.4	390.4	392.4	1176.2	392.067									SE.m	4.35076
E2T6	394.4	398.4	411	1203.8	401.267								Factor B	CD	12.5042
E2T7	378.4	374.4	362	1114.8	371.6
E2T8	390.4	383.4	388.4	1162.2	387.4
E2T9	375.4	371.4	374.4	1121.2	373.733
Total	6494.8	6535.8	6585	19615.6	363.252
Mean	360.822	363.1	365.833
CF	7.1254e+06
TSSQ	148801	RSSQ	226.624
tSSQ	144713	ESSQ	3861.54

## Sheet: Dry matter
		2019
		Dry matter 30DAT
Main factors	2
Sub factors	9	Total factors	18
Replications	3
Treatments	R1	R2	R3	Total	Mean									Factors Mean
E1T1	133.31	166.45	174.09	473.85	157.95				ANOVA					1	245.129	1
E1T2	236.06	253.39	267.08	756.53	252.177		df	SS	MSS	Cal F	Table F	Result		2	235.267	2
E1T3	249.08	269.06	303.48	821.62	273.873	Replication	2	14822	7410.99	45.2394	3.2759	S		SE.m	2.46319
E1T4	207.68	241.85	266.08	715.61	238.537	Treatment	17	57908.4	3406.38	20.7938	1.93321	S	Factor A	CD	7.07927
E1T5	243.18	261.06	278.98	783.22	261.073	Factor A	1	1312.76	1312.76	8.01358	4.13002	S		1	157.61	9	9
E1T6	246.48	282.06	313.18	841.72	280.573	Factor B	8	1.43016e+07	1.7877e+06	10912.8	2.22534	S		2	248.252	5	5
E1T7	213.39	231.06	264.08	708.53	236.177	A*B	8	-1.4245e+07	-1.78062e+06	-10869.6	2.22534	NS		3	265.768	2	2
E1T8	262.39	267.35	276.08	805.82	268.607	Error	34	5569.78	163.817					4	234.713	7	7
E1T9	223.34	236.15	252.08	711.57	237.19	Total	53	78300.2		t34=	2.03224			5	254.537	4	3
E2T1	125.65	131.58	214.58	471.81	157.27	SE.m	7.38956							6	273.14	1	1
E2T2	239.86	241.56	251.56	732.98	244.327	CD	21.2378							7	235.427	6	6
E2T3	215.85	264.58	292.56	772.99	257.663	CV	5.32856							8	260.45	3	4
E2T4	224.89	221.89	245.89	692.67	230.89									9	231.885	8	8
E2T5	225.68	252.48	265.84	744	248									SE.m	5.22521
E2T6	241.56	269.87	285.69	797.12	265.707								Factor B	CD	15.0174
E2T7	225.89	231.56	246.58	704.03	234.677
E2T8	238.41	257.89	260.58	756.88	252.293
E2T9	214.87	225.89	238.98	679.74	226.58
Total	3967.57	4305.73	4697.39	12970.7	240.198
Mean	220.421	239.207	260.966
CF	3.11553e+06
TSSQ	78300.2	RSSQ	14822
tSSQ	57908.4	ESSQ	5569.78
		60 DAT
Main factors	2
Sub factors	9	Total factors	18
Replications	3
Treatments	R1	R2	R3	Total	Mean									Factors Mean
E1T1	402.08	413.08	486.09	1301.25	433.75				ANOVA					1	603.796	1
E1T2	631.75	660.39	669.09	1961.23	653.743		df	SS	MSS	Cal F	Table F	Result		2	582.523	2
E1T3	663.09	668.39	679.4	2010.88	670.293	Replication	2	929.43	464.715	2.83679	3.2759	NS		SE.m	6.65102
E1T4	590.34	542.37	520.37	1653.08	551.027	Treatment	17	337031	19825.4	121.021	1.93321	S	Factor A	CD	19.1152
E1T5	655.39	662.08	668.39	1985.86	661.953	Factor A	1	6109.28	6109.28	37.2933	4.13002	S		1	430.665	9	9
E1T6	755.09	659.06	672.04	2086.19	695.397	Factor B	8	8.84067e+07	1.10508e+07	67458.4	2.22534	S		2	642.792	5	5
E1T7	611.07	599.09	469.09	1679.25	559.75	A*B	8	-8.80758e+07	-1.10095e+07	-67205.9	2.22534	NS		3	654.933	2	2
E1T8	655.04	660.39	669.09	1984.52	661.507	Error	34	40608.7	1194.37					4	541.133	7	7
E1T9	587.09	542.06	511.08	1640.23	546.743	Total	53	378569		t34=	2.03224			5	649.227	3	3
E2T1	396.58	403.59	482.57	1282.74	427.58	SE.m	19.953							6	686.972	1	1
E2T2	625.41	631.52	638.59	1895.52	631.84	CD	57.3456							7	553.55	6	6
E2T3	618.57	631.56	668.59	1918.72	639.573	CV	5.82637							8	644.693	4	4
E2T4	502.59	528.59	562.54	1593.72	531.24									9	534.47	8	8
E2T5	611.54	640.11	657.85	1909.5	636.5									SE.m	14.1089
E2T6	704.51	672.54	658.59	2035.64	678.547								Factor B	CD	40.5495
E2T7	543.21	545.87	552.97	1642.05	547.35
E2T8	605.48	625.58	652.58	1883.64	627.88
E2T9	501.42	508.59	556.58	1566.59	522.197
Total	10660.3	10594.9	10775.5	32030.6	593.159
Mean	592.236	588.603	598.639
CF	1.89993e+07
TSSQ	378569	RSSQ	929.43
tSSQ	337031	ESSQ	40608.7
		90 DAT
Main factors	2
Sub factors	9	Total factors	18
Replications	3
Treatments	R1	R2	R3	Total	Mean									Factors Mean
E1T1	515.86	607.84	796.58	1920.28	640.093				ANOVA					1	869.923	1
E1T2	889.69	806.59	978.59	2674.87	891.623		df	SS	MSS	Cal F	Table F	Result		2	830.793	2
E1T3	889.58	985.59	946.58	2821.75	940.583	Replication	2	91242.8	45621.4	278.49	3.2759	S		SE.m	13.1432
E1T4	786.59	823.45	926.54	2536.58	845.527	Treatment	17	470362	27668.4	168.898	1.93321	S	Factor A	CD	37.774
E1T5	886.59	996.25	900.26	2783.1	927.7	Factor A	1	20669.8	20669.8	126.176	4.13002	S		1	623.433	9	9
E1T6	859.62	995.56	1052.16	2907.34	969.113	Factor B	8	1.77942e+08	2.22428e+07	135778	2.22534	S		2	865.368	5	5
E1T7	803.26	916.56	832.56	2552.38	850.793	A*B	8	-1.77493e+08	-2.21866e+07	-135435	2.22534	NS		3	917.627	2	2
E1T8	914.56	913.56	942.57	2770.69	923.563	Error	34	158579	4664.09					4	823.682	7	7
E1T9	768.59	846.65	905.68	2520.92	840.307	Total	53	720184		t34=	2.03224			5	913.62	3	3
E2T1	525.48	559.56	735.28	1820.32	606.773	SE.m	39.4296							6	945.733	1	1
E2T2	765.98	952.68	798.68	2517.34	839.113	CD	113.322							7	838.987	6	6
E2T3	801.56	992.56	889.89	2684.01	894.67	CV	8.03122							8	908.533	4	4
E2T4	715.68	796.58	893.25	2405.51	801.837									9	816.238	8	8
E2T5	815.68	982.68	900.26	2698.62	899.54									SE.m	27.881
E2T6	901.26	945.68	920.12	2767.06	922.353								Factor B	CD	80.1307
E2T7	789.69	905.26	786.59	2481.54	827.18
E2T8	865.59	822.36	992.56	2680.51	893.503
E2T9	769.59	891.24	715.68	2376.51	792.17
Total	14264.9	15740.6	15913.8	45919.3	850.358
Mean	792.492	874.481	884.102
CF	3.90479e+07
TSSQ	720184	RSSQ	91242.8
tSSQ	470362	ESSQ	158579
		AT HARVEST
Main factors	2
Sub factors	9	Total factors	18
Replications	3
Treatments	R1	R2	R3	Total	Mean									Factors Mean
E1T1	597.76	699.75	883.08	2180.59	726.863				ANOVA					1	1005.96	1
E1T2	1056.45	999.02	1111.06	3166.53	1055.51		df	SS	MSS	Cal F	Table F	Result		2	958.419	2
E1T3	987.79	1038.08	1200.06	3225.93	1075.31	Replication	2	20805.4	10402.7	63.502	3.2759	S		SE.m	12.3994
E1T4	992.95	968.39	988.09	2949.43	983.143	Treatment	17	658648	38744	236.508	1.93321	S	Factor A	CD	35.6362
E1T5	1087.49	1067.39	1073.48	3228.36	1076.12	Factor A	1	30511.2	30511.2	186.252	4.13002	S		1	699.435	9	9
E1T6	1113.18	1086.08	1103.18	3302.44	1100.81	Factor B	8	2.37046e+08	2.96307e+07	180877	2.22534	S		2	1028.86	5	5
E1T7	993.19	1078.35	918.06	2989.6	996.533	A*B	8	-2.36418e+08	-2.95522e+07	-180398	2.22534	NS		3	1048.57	2	2
E1T8	1069.09	1053.39	1063.34	3185.82	1061.94	Error	34	141138	4151.12					4	967.072	7	7
E1T9	986.07	958.35	987.78	2932.2	977.4	Total	53	820591		t34=	2.03224			5	1048.07	3	3
E2T1	612.52	652.25	751.25	2016.02	672.007	SE.m	37.1982							6	1074.84	1	1
E2T2	921.54	961.25	1123.85	3006.64	1002.21	CD	106.909							7	976.43	6	6
E2T3	971.15	1013.18	1081.18	3065.51	1021.84	CV	6.55975				47.5404			8	1044.5	4	4
E2T4	924.56	1001.58	926.86	2853	951									9	951.92	8	8
E2T5	989.56	1081.29	989.19	3060.04	1020.01									SE.m	26.3031
E2T6	1081.58	983.16	1081.85	3146.59	1048.86								Factor B	CD	75.5958
E2T7	1001.54	936.58	930.86	2868.98	956.327
E2T8	1101.86	930.16	1049.19	3081.21	1027.07
E2T9	951.15	911.59	916.58	2779.32	926.44
Total	17439.4	17419.8	18178.9	53038.2	982.189
Mean	968.857	967.769	1009.94
CF	5.20936e+07
TSSQ	820591	RSSQ	20805.4
tSSQ	658648	ESSQ	141138
		2020
		Dry matter 30DAT
Main factors	2
Sub factors	9	Total factors	18
Replications	3
Treatments	R1	R2	R3	Total	Mean									Factors Mean
E1T1	132.52	173.5	183.65	489.67	163.223				ANOVA					1	249.708	1	1
E1T2	244.64	261.89	271.66	778.19	259.397		df	SS	MSS	Cal F	Table F	Result		2	240.374	2	2
E1T3	270.81	279.56	290.56	840.93	280.31	Replication	2	8912.39	4456.2	27.2023	3.2759	S		SE.m	2.49801
E1T4	235.1	240.56	249.65	725.31	241.77	Treatment	17	60153.4	3538.44	21.5999	1.93321	S	Factor A	CD	7.17934
E1T5	268.69	272.65	282.25	823.59	274.53	Factor A	1	1176.28	1176.28	7.18045	4.13002	S		1	162.76	9	9
E1T6	243.6	287.89	317.8	849.29	283.097	Factor B	8	1.49155e+07	1.86444e+06	11381.2	2.22534	S		2	252.917	5	5
E1T7	236.66	237.89	244.69	719.24	239.747	A*B	8	-1.48565e+07	-1.85707e+06	-11336.2	2.22534	NS		3	272.335	2	2
E1T8	246.68	266.68	285.56	798.92	266.307	Error	34	5728.36	168.481					4	237.333	7	7
E1T9	232.65	239.65	244.68	716.98	238.993	Total	53	74794.2		t34=	2.03224			5	265.18	3	3
E2T1	122.56	158.65	205.68	486.89	162.297	SE.m	7.49402							6	281.517	1	1
E2T2	234.65	248.21	256.45	739.31	246.437	CD	21.538							7	238.952	6	6
E2T3	248.68	267.56	276.84	793.08	264.36	CV	5.29709							8	260.025	4	4
E2T4	228.56	228.78	241.35	698.69	232.897									9	234.35	8	8
E2T5	242.35	262.13	263.01	767.49	255.83									SE.m	5.29908
E2T6	241.58	272.45	325.78	839.81	279.937								Factor B	CD	15.2297
E2T7	228.31	234.54	251.62	714.47	238.157
E2T8	241.32	256.34	263.57	761.23	253.743
E2T9	224.56	229.15	235.41	689.12	229.707
Total	4123.92	4418.08	4690.21	13232.2	245.041
Mean	229.107	245.449	260.567
CF	3.24243e+06
TSSQ	74794.2	RSSQ	8912.39
tSSQ	60153.4	ESSQ	5728.36
		60 DAT
Main factors	2
Sub factors	9	Total factors	18
Replications	3
Treatments	R1	R2	R3	Total	Mean									Factors Mean
E1T1	420.15	450.24	540.26	1410.65	470.217				ANOVA					1	612.723	1	1
E1T2	641.58	648.59	694.58	1984.75	661.583		df	SS	MSS	Cal F	Table F	Result		2	587.882	2	2
E1T3	610.59	698.89	742.15	2051.63	683.877	Replication	2	42118.3	21059.2	128.553	3.2759	S		SE.m	7.25443
E1T4	527.85	546.25	587.98	1662.08	554.027	Treatment	17	336417	19789.2	120.801	1.93321	S	Factor A	CD	20.8494
E1T5	698.58	654.12	650.58	2003.28	667.76	Factor A	1	8330.34	8330.34	50.8515	4.13002	S		1	446.043	9	9
E1T6	625.68	685.45	778.59	2089.72	696.573	Factor B	8	9.05522e+07	1.1319e+07	69095.6	2.22534	S		2	647.46	5	5
E1T7	510.54	548.35	652.45	1711.34	570.447	A*B	8	-9.02242e+07	-1.1278e+07	-68845.2	2.22534	NS		3	666.825	2	2
E1T8	658.49	659.29	660.25	1978.03	659.343	Error	34	48311.4	1420.92					4	541.572	7	7
E1T9	506.89	543.55	601.59	1652.03	550.677	Total	53	426846		t34=	2.03224			5	664.962	3	3
E2T1	400.26	405.1	460.25	1265.61	421.87	SE.m	21.7633							6	688.827	1	1
E2T2	605.54	695.58	598.89	1900.01	633.337	CD	62.5483							7	556.128	6	6
E2T3	602.15	648.58	698.59	1949.32	649.773	CV	6.27936							8	652.292	4	4
E2T4	510.25	535.54	541.56	1587.35	529.117									9	538.612	8	8
E2T5	695.85	648.49	642.15	1986.49	662.163									SE.m	15.389
E2T6	615.48	651.87	775.89	2043.24	681.08								Factor B	CD	44.2283
E2T7	500.12	505.16	620.15	1625.43	541.81
E2T8	610.25	649.89	675.58	1935.72	645.24
E2T9	502.48	535.58	541.58	1579.64	526.547
Total	10242.7	10710.5	11463.1	32416.3	600.302
Mean	569.041	595.029	636.837
CF	1.94596e+07
TSSQ	426846	RSSQ	42118.3
tSSQ	336417	ESSQ	48311.4
		90 DAT
Main factors	2
Sub factors	9	Total factors	18
Replications	3
Treatments	R1	R2	R3	Total	Mean									Factors Mean
E1T1	559.85	610.25	799.59	1969.69	656.563				ANOVA					1	875.641	1
E1T2	958.86	895.68	841.58	2696.12	898.707		df	SS	MSS	Cal F	Table F	Result		2	834.16	2
E1T3	975.58	950.25	915.48	2841.31	947.103	Replication	2	97775.4	48887.7	298.429	3.2759	S		SE.m	13.5458
E1T4	738.59	825.44	970.15	2534.18	844.727	Treatment	17	480186	28246.2	172.426	1.93321	S	Factor A	CD	38.931
E1T5	895.68	940.15	985.87	2821.7	940.567	Factor A	1	23230	23230	141.805	4.13002	S		1	627.332	9	9
E1T6	910.68	994.56	998.58	2903.82	967.94	Factor B	8	1.7988e+08	2.2485e+07	137257	2.22534	S		2	869.35	5	5
E1T7	778.65	851.24	968.59	2598.48	866.16	A*B	8	-1.79423e+08	-2.24279e+07	-136908	2.22534	NS		3	929.232	2	2
E1T8	941.25	886.58	948.51	2776.34	925.447	Error	34	168443	4954.19					4	826.008	7	7
E1T9	781.58	920.56	798.54	2500.68	833.56	Total	53	746404		t34=	2.03224			5	922.428	3	3
E2T1	511.59	505.86	776.85	1794.3	598.1	SE.m	40.6374							6	947.037	1	1
E2T2	782.54	935.86	801.58	2519.98	839.993	CD	116.793							7	841.815	6	6
E2T3	962.54	835.86	935.68	2734.08	911.36	CV	8.23324							8	910.68	4	4
E2T4	728.86	752.86	940.15	2421.87	807.29									9	820.223	8	8
E2T5	805.75	935.54	971.58	2712.87	904.29									SE.m	28.735
E2T6	816.58	962.56	999.26	2778.4	926.133								Factor B	CD	82.5851
E2T7	742.15	824.57	885.69	2452.41	817.47
E2T8	852.87	908.29	926.58	2687.74	895.913
E2T9	741.58	785.56	893.52	2420.66	806.887
Total	14485.2	15321.7	16357.8	46164.6	854.901
Mean	804.732	851.204	908.766
CF	3.94662e+07
TSSQ	746404	RSSQ	97775.4
tSSQ	480186	ESSQ	168443
		AT HARVEST
Main factors	2
Sub factors	9	Total factors	18
Replications	3
Treatments	R1	R2	R3	Total	Mean									Factors Mean
E1T1	610.29	702.25	910.26	2222.8	740.933				ANOVA					1	1021.89	1
E1T2	1072.58	1021.56	1126.58	3220.72	1073.57		df	SS	MSS	Cal F	Table F	Result		2	967.098	2
E1T3	1005.86	1060.24	1216.58	3282.68	1094.23	Replication	2	23703.1	11851.6	72.3464	3.2759	S		SE.m	12.6776
E1T4	1007.58	985.58	1003.56	2996.72	998.907	Treatment	17	641249	37720.5	230.26	1.93321	S	Factor A	CD	36.4357
E1T5	1101.25	1081.56	1088.95	3271.76	1090.59	Factor A	1	40523	40523	247.367	4.13002	S		1	719.323	9	9
E1T6	1128.56	1100.25	1118.59	3347.4	1115.8	Factor B	8	2.42889e+08	3.03611e+07	185336	2.22534	S		2	1043.41	5	5
E1T7	1007.58	1094.58	940.25	3042.41	1014.14	A*B	8	-2.42288e+08	-3.02861e+07	-184877	2.22534	NS		3	1061.4	2	2
E1T8	1084.53	1067.58	1078.58	3230.69	1076.9	Error	34	147541	4339.46					4	977.855	7	7
E1T9	1000.23	972.25	1003.25	2975.73	991.91	Total	53	812493		t34=	2.03224			5	1058.48	3	3
E2T1	617.98	667.58	807.58	2093.14	697.713	SE.m	38.0327							6	1085.19	1	1
E2T2	937.58	972.58	1129.58	3039.74	1013.25	CD	109.307							7	988.335	6	6
E2T3	983.25	1018.25	1084.25	3085.75	1028.58	CV	6.62394							8	1054.8	4	4
E2T4	933.25	1006.58	930.58	2870.41	956.803									9	961.637	8	8
E2T5	992.25	1092.25	994.59	3079.09	1026.36									SE.m	26.8932
E2T6	1089.58	987.58	1086.58	3163.74	1054.58								Factor B	CD	77.2917
E2T7	1007.48	941.58	938.54	2887.6	962.533
E2T8	1105.25	938.58	1054.25	3098.08	1032.69
E2T9	955.25	917.26	921.58	2794.09	931.363
Total	17640.3	17628.1	18434.1	53702.5	994.492
Mean	980.018	979.338	1024.12
CF	5.34067e+07
TSSQ	812493	RSSQ	23703.1
tSSQ	641249	ESSQ	147541

## Sheet: LAI
		2020
		LAI 30DAT
Main factors	2
Sub factors	9	Total factors	18
Replications	3
Treatments	R1	R2	R3	Total	Mean									Factors Mean
E1T1	1.78	1.89	1.83	5.5	1.83333				ANOVA					1	2.27926	2
E1T2	2.22	2.19	2.26	6.67	2.22333		df	SS	MSS	Cal F	Table F	Result		2	2.30852	1
E1T3	2.52	2.68	2.58	7.78	2.59333	Replication	2	0.00703333	0.00351667	1.02632	3.2759	NS		SE.m	0.0112653
E1T4	2.12	2.16	2.14	6.42	2.14	Treatment	17	3.11555	0.183268	53.4858	1.93321	S	Factor A	CD	0.0323767
E1T5	2.48	2.56	2.48	7.52	2.50667	Factor A	1	0.0115574	0.0115574	3.37298	4.13002	NS		1	1.865	9	9
E1T6	2.66	2.57	2.72	7.95	2.65	Factor B	8	1303.78	162.973	47562.9	2.22534	S		2	2.25167	5	5
E1T7	2.14	2.18	2.16	6.48	2.16	A*B	8	-1300.68	-162.585	-47449.7	2.22534	NS		3	2.58833	2	2
E1T8	2.34	2.28	2.3	6.92	2.30667	Error	34	0.1165	0.00342647					4	2.15833	7	7
E1T9	2.12	2.14	2.04	6.3	2.1	Total	53	3.23908		t34=	2.03224			5	2.48333	3	3
E2T1	1.89	1.98	1.82	5.69	1.89667	SE.m	0.0337958							6	2.67333	1	1
E2T2	2.26	2.29	2.29	6.84	2.28	CD	0.0971301							7	2.17333	6	6
E2T3	2.68	2.51	2.56	7.75	2.58333	CV	2.55183							8	2.32667	4	4
E2T4	2.11	2.16	2.26	6.53	2.17667									9	2.125	8	8
E2T5	2.52	2.48	2.38	7.38	2.46									SE.m	0.0238972
E2T6	2.62	2.75	2.72	8.09	2.69667								Factor B	CD	0.0686814
E2T7	2.18	2.16	2.22	6.56	2.18667
E2T8	2.38	2.38	2.28	7.04	2.34667
E2T9	2.14	2.22	2.09	6.45	2.15
Total	41.16	41.58	41.13	123.87	2.29389
Mean	2.28667	2.31	2.285
CF	284.144
TSSQ	3.23908	RSSQ	0.00703333
tSSQ	3.11555	ESSQ	0.1165
		60 DAT
Main factors	2
Sub factors	9	Total factors	18
Replications	3
Treatments	R1	R2	R3	Total	Mean									Factors Mean
E1T1	3.18	3.22	3.14	9.54	3.18				ANOVA					1	3.53741	2
E1T2	3.51	3.58	3.48	10.57	3.52333		df	SS	MSS	Cal F	Table F	Result		2	3.58741	1
E1T3	3.78	3.79	3.84	11.41	3.80333	Replication	2	0.00551481	0.00275741	0.804737	3.2759	NS		SE.m	0.00864568
E1T4	3.38	3.42	3.36	10.16	3.38667	Treatment	17	2.60425	0.153191	44.7082	1.93321	S	Factor A	CD	0.0248479
E1T5	3.74	3.66	3.76	11.16	3.72	Factor A	1	0.03375	0.03375	9.84979	4.13002	S		1	3.195	9	9
E1T6	3.86	3.81	3.84	11.51	3.83667	Factor B	8	3098.48	387.309	113034	2.22534	S		2	3.55167	5	5
E1T7	3.41	3.36	3.46	10.23	3.41	A*B	8	-3095.9	-386.988	-112941	2.22534	NS		3	3.825	2	2
E1T8	3.64	3.52	3.67	10.83	3.61	Error	34	0.0686185	0.00201819					4	3.40167	7	7
E1T9	3.38	3.34	3.38	10.1	3.36667	Total	53	2.67839		t34=	2.03224			5	3.75	3	3
E2T1	3.2	3.25	3.18	9.63	3.21	SE.m	0.0259371							6	3.89	1	1
E2T2	3.56	3.58	3.6	10.74	3.58	CD	0.0745438							7	3.43	6	6
E2T3	3.86	3.8	3.88	11.54	3.84667	CV	1.26107							8	3.635	4	4
E2T4	3.38	3.41	3.46	10.25	3.41667									9	3.38333	8	8
E2T5	3.74	3.78	3.82	11.34	3.78									SE.m	0.0183403
E2T6	3.95	3.99	3.89	11.83	3.94333								Factor B	CD	0.0527104
E2T7	3.36	3.49	3.5	10.35	3.45
E2T8	3.68	3.62	3.68	10.98	3.66
E2T9	3.4	3.36	3.44	10.2	3.4
Total	64.01	63.98	64.38	192.37	3.56241
Mean	3.55611	3.55444	3.57667
CF	685.3
TSSQ	2.67839	RSSQ	0.00551481
tSSQ	2.60425	ESSQ	0.0686185
		90 DAT
Main factors	2
Sub factors	9	Total factors	18
Replications	3
Treatments	R1	R2	R3	Total	Mean									Factors Mean
E1T1	3.09	2.94	3.14	9.17	3.05667				ANOVA					1	3.44667	2
E1T2	3.38	3.45	3.46	10.29	3.43		df	SS	MSS	Cal F	Table F	Result		2	3.50222	1
E1T3	3.72	3.68	3.69	11.09	3.69667	Replication	2	0.00884444	0.00442222	1.29061	3.2759	NS		SE.m	0.0100555
E1T4	3.35	3.24	3.26	9.85	3.28333	Treatment	17	2.92987	0.172345	50.2981	1.93321	S	Factor A	CD	0.0288999
E1T5	3.68	3.58	3.69	10.95	3.65	Factor A	1	0.0416667	0.0416667	12.1602	4.13002	S		1	3.08167	9	9
E1T6	3.81	3.72	3.78	11.31	3.77	Factor B	8	2956.2	369.524	107844	2.22534	S		2	3.47333	5	5
E1T7	3.36	3.31	3.32	9.99	3.33	A*B	8	-2953.31	-369.163	-107739	2.22534	NS		3	3.73833	2	2
E1T8	3.53	3.51	3.59	10.63	3.54333	Error	34	0.0928222	0.00273007					4	3.30167	7	7
E1T9	3.26	3.28	3.24	9.78	3.26	Total	53	3.03153		t34=	2.03224			5	3.68167	3	3
E2T1	3.16	3.18	2.98	9.32	3.10667	SE.m	0.0301666							6	3.81167	1	1
E2T2	3.5	3.49	3.56	10.55	3.51667	CD	0.0866996							7	3.34167	6	6
E2T3	3.78	3.8	3.76	11.34	3.78	CV	1.50384							8	3.57167	4	4
E2T4	3.36	3.28	3.32	9.96	3.32									9	3.26833	8	8
E2T5	3.7	3.68	3.76	11.14	3.71333									SE.m	0.021331
E2T6	3.84	3.92	3.8	11.56	3.85333								Factor B	CD	0.0613058
E2T7	3.41	3.31	3.34	10.06	3.35333
E2T8	3.63	3.59	3.58	10.8	3.6
E2T9	3.24	3.28	3.31	9.83	3.27667
Total	62.8	62.24	62.58	187.62	3.47444
Mean	3.48889	3.45778	3.47667
CF	651.875
TSSQ	3.03153	RSSQ	0.00884444
tSSQ	2.92987	ESSQ	0.0928222
		2019
		LAI 30DAT
Main factors	2
Sub factors	9	Total factors	18
Replications	3
Treatments	R1	R2	R3	Total	Mean									Factors Mean
E1T1	1.74	1.88	1.8	5.42	1.80667				ANOVA					1	2.25185	2	1
E1T2	2.1	2.17	2.25	6.52	2.17333		df	SS	MSS	Cal F	Table F	Result		2	2.29074	1	2
E1T3	2.44	2.64	2.52	7.6	2.53333	Replication	2	0.00458148	0.00229074	0.668542	3.2759	NS		SE.m	0.00962355
E1T4	2.09	2.15	2.1	6.34	2.11333	Treatment	17	3.12101	0.183589	53.5796	1.93321	S	Factor A	CD	0.0276584
E1T5	2.45	2.54	2.46	7.45	2.48333	Factor A	1	0.0204167	0.0204167	5.95851	4.13002	S		1	1.83333	9	9
E1T6	2.64	2.55	2.69	7.88	2.62667	Factor B	8	1277	159.625	46585.8	2.22534	S		2	2.21333	5	5
E1T7	2.1	2.16	2.15	6.41	2.13667	A*B	8	-1273.9	-159.237	-46472.7	2.22534	NS		3	2.54667	2	2
E1T8	2.3	2.31	2.29	6.9	2.3	Error	34	0.0850185	0.00250054					4	2.13333	7	7
E1T9	2.08	2.11	2.09	6.28	2.09333	Total	53	3.21061		t34=	2.03224			5	2.46667	3	3
E2T1	1.91	1.82	1.85	5.58	1.86	SE.m	0.0288707							6	2.655	1	1
E2T2	2.28	2.26	2.22	6.76	2.25333	CD	0.0829751							7	2.15667	6	6
E2T3	2.61	2.48	2.59	7.68	2.56	CV	2.20163							8	2.32	4	4
E2T4	2.15	2.18	2.13	6.46	2.15333									9	2.11667	8	8
E2T5	2.44	2.45	2.46	7.35	2.45									SE.m	0.0204146
E2T6	2.71	2.66	2.68	8.05	2.68333								Factor B	CD	0.0586722
E2T7	2.16	2.15	2.22	6.53	2.17667
E2T8	2.3	2.4	2.32	7.02	2.34
E2T9	2.15	2.11	2.16	6.42	2.14
Total	40.65	41.02	40.98	122.65	2.2713
Mean	2.25833	2.27889	2.27667
CF	278.574
TSSQ	3.21061	RSSQ	0.00458148
tSSQ	3.12101	ESSQ	0.0850185
		60 DAT
Main factors	2
Sub factors	9	Total factors	18
Replications	3
Treatments	R1	R2	R3	Total	Mean									Factors Mean
E1T1	3.14	3.19	3.16	9.49	3.16333				ANOVA					1	3.51963	2	1
E1T2	3.48	3.57	3.46	10.51	3.50333		df	SS	MSS	Cal F	Table F	Result		2	3.5763	1	2
E1T3	3.76	3.77	3.83	11.36	3.78667	Replication	2	0.0038037	0.00190185	0.555047	3.2759	NS		SE.m	0.00778685
E1T4	3.38	3.39	3.35	10.12	3.37333	Treatment	17	2.59261	0.152506	44.5083	1.93321	S	Factor A	CD	0.0223796
E1T5	3.71	3.64	3.75	11.1	3.7	Factor A	1	0.04335	0.04335	12.6515	4.13002	S		1	3.18333	9	9
E1T6	3.85	3.79	3.82	11.46	3.82	Factor B	8	3073.31	384.164	112117	2.22534	S		2	3.535	5	5
E1T7	3.38	3.37	3.44	10.19	3.39667	A*B	8	-3070.77	-383.846	-112024	2.22534	NS		3	3.81167	2	2
E1T8	3.62	3.49	3.64	10.75	3.58333	Error	34	0.055663	0.00163715					4	3.38667	7	7
E1T9	3.36	3.32	3.37	10.05	3.35	Total	53	2.65208		t34=	2.03224			5	3.73333	3	3
E2T1	3.24	3.22	3.15	9.61	3.20333	SE.m	0.0233606							6	3.87667	1	1
E2T2	3.54	3.59	3.57	10.7	3.56667	CD	0.0671389							7	3.42	6	6
E2T3	3.84	3.79	3.88	11.51	3.83667	CV	1.14042							8	3.615	4	4
E2T4	3.41	3.38	3.41	10.2	3.4									9	3.37	8	8
E2T5	3.76	3.75	3.79	11.3	3.76667									SE.m	0.0165184
E2T6	3.94	3.97	3.89	11.8	3.93333								Factor B	CD	0.0474744
E2T7	3.39	3.46	3.48	10.33	3.44333
E2T8	3.68	3.61	3.65	10.94	3.64667
E2T9	3.38	3.38	3.41	10.17	3.39
Total	63.86	63.68	64.05	191.59	3.54796
Mean	3.54778	3.53778	3.55833
CF	679.754
TSSQ	2.65208	RSSQ	0.0038037
tSSQ	2.59261	ESSQ	0.055663
		90 DAT
Main factors	2
Sub factors	9	Total factors	18
Replications	3
Treatments	R1	R2	R3	Total	Mean									Factors Mean
E1T1	3.07	2.94	3.11	9.12	3.04				ANOVA					1	3.4163	2
E1T2	3.32	3.41	3.42	10.15	3.38333		df	SS	MSS	Cal F	Table F	Result		2	3.48815	1
E1T3	3.69	3.65	3.66	11	3.66667	Replication	2	0.0169	0.00845	2.46609	3.2759	NS		SE.m	0.0112749
E1T4	3.31	3.22	3.19	9.72	3.24	Treatment	17	2.91733	0.171608	50.083	1.93321	S	Factor A	CD	0.0324045
E1T5	3.65	3.54	3.66	10.85	3.61667	Factor A	1	0.0696963	0.0696963	20.3405	4.13002	S		1	3.07	9	9
E1T6	3.79	3.69	3.75	11.23	3.74333	Factor B	8	2918.93	364.867	106485	2.22534	S		2	3.44333	5	5
E1T7	3.35	3.29	3.31	9.95	3.31667	A*B	8	-2916.08	-364.511	-106381	2.22534	NS		3	3.71833	2	2
E1T8	3.51	3.49	3.54	10.54	3.51333	Error	34	0.1167	0.00343235					4	3.27167	7	7
E1T9	3.21	3.25	3.22	9.68	3.22667	Total	53	3.05093		t34=	2.03224			5	3.65667	3	3
E2T1	3.19	3.17	2.94	9.3	3.1	SE.m	0.0338248							6	3.79	1	1
E2T2	3.51	3.42	3.58	10.51	3.50333	CD	0.0972134							7	3.32833	6	6
E2T3	3.78	3.81	3.72	11.31	3.77	CV	1.69706							8	3.54667	4	4
E2T4	3.35	3.26	3.3	9.91	3.30333									9	3.245	8	8
E2T5	3.73	3.64	3.72	11.09	3.69667									SE.m	0.0239178
E2T6	3.84	3.88	3.79	11.51	3.83667								Factor B	CD	0.0687403
E2T7	3.41	3.28	3.33	10.02	3.34
E2T8	3.61	3.55	3.58	10.74	3.58
E2T9	3.21	3.26	3.32	9.79	3.26333
Total	62.53	61.75	62.14	186.42	3.45222
Mean	3.47389	3.43056	3.45222
CF	643.563
TSSQ	3.05093	RSSQ	0.0169
tSSQ	2.91733	ESSQ	0.1167

## Sheet: NPK UPTAKES (kg ha-1)
	Maize N, K & Bio fertigation - yield attributes- 2018-19
N UPTAKE AT 30 DAS (kg ha-1)
Treatments	R1	R2	R3	Total	Mean			ANOVA					Factors Mean
T1- 100%RDF-M0	19.4333	13.0787	11.4849	43.997	14.6657								1	13.0869
T2- 100%RDF-SM	12.494	9.02156	16.2609	37.7765	12.5922		df	SS	MSS	Cal F	Table F		0.75	13.0033
T3-100%RDF-FM3	14.2803	12.9121	14.4317	41.6241	13.8747	Replication	2	20.2119	10.106	0.599038	3.73889	ns	SE.m	1.18569
T4-100%RDF-FM5	10.8509	12.1975	10.5966	33.645	11.215	Treatment	7	42.8499	6.12141	0.362851	2.7642	ns	CD	3.59642
T5- 75%RDF-M0	10	17.1477	12.4077	39.5554	13.1851	RDF	1	0.0419262	0.0419262	0.00248521	4.60011	ns	MC0	13.9254
T6- 75%RDF-SM	10.5127	8.5761	13.1092	32.198	10.7327	MC	3	21.1521	7.05069	0.417935	3.34389	ns	SMC	11.6624
T7-75%RDF-FM3	9.77914	22.8983	9.05709	41.7345	13.9115	RDFxMC	3	21.6559	7.21862	0.427889	3.34389	ns	MC3	13.8931
T8-75%RDF-FM5	12.2622	18.8989	11.3904	42.5515	14.1838	Error	14	236.185	16.8703				MC5	12.6994
Total	99.6126	114.731	98.7385	313.082	13.0451	Total	23	299.246		t14=	2.14479		SE.m	1.67682
Mean	12.4516	14.3414	12.3423			SE.m	2.37138						CD	5.0861
CF	4084.18					CD	7.19284
TSSQ	299.246	RSSQ	20.2119			CV	31.4858
tSSQ	42.8499	ESSQ	236.185
N UPTAKE AT 60 DAS (kg ha-1)
Treatments	R1	R2	R3	Total	Mean			ANOVA					Factors Mean
T1- 100%RDF-M0	142.353	208.457	229.205	580.015	193.338								1	194.745
T2- 100%RDF-SM	126.377	181.688	231.024	539.089	179.696		df	SS	MSS	Cal F	Table F		0.75	162.821
T3-100%RDF-FM3	163.692	185.281	240.187	589.159	196.386	Replication	2	33453.6	16726.8	22.5281	3.73889	sig	SE.m	7.86599
T4-100%RDF-FM5	187.879	217.454	223.338	628.672	209.557	Treatment	7	28143.5	4020.5	5.41492	2.7642	sig	CD	23.859
T5- 75%RDF-M0	0	157.14	151.278	308.418	102.806	RDF	1	6114.71	6114.71	8.23545	4.60011	sig	MC0	148.072
T6- 75%RDF-SM	133.33	125.904	187.052	446.286	148.762	MC	3	14252.8	4750.95	6.3987	3.34389	sig	SMC	164.229
T7-75%RDF-FM3	128.827	212.218	218.872	559.917	186.639	RDFxMC	3	7775.95	2591.98	3.49095	3.34389	sig	MC3	191.513
T8-75%RDF-FM5	147.94	224.172	267.119	639.23	213.077	Error	14	10394.8	742.486				MC5	211.317
Total	1030.4	1512.31	1748.07	4290.79	178.783	Total	23	71991.9		t14=	2.14479		SE.m	11.1242
Mean	128.8	189.039	218.509			SE.m	15.732						CD	33.7418
CF	767118					CD	47.7181
TSSQ	71991.9	RSSQ	33453.6			CV	15.2412
tSSQ	28143.5	ESSQ	10394.8
N UPTAKE AT 90 DAS (kg ha-1)
Treatments	R1	R2	R3	Total	Mean			ANOVA					Factors Mean
T1- 100%RDF-M0	328.859	252.279	258.27	839.407	279.802								1	328.585
T2- 100%RDF-SM	298.986	297.732	354.776	951.495	317.165		df	SS	MSS	Cal F	Table F		0.75	329.05
T3-100%RDF-FM3	360.178	316.661	360.359	1037.2	345.733	Replication	2	-1.10943e+06	-554713	-6.00649	3.73889	ns	SE.m	87.727
T4-100%RDF-FM5	394.787	309.165	410.968	1114.92	371.64	Treatment	7	43086.1	6155.15	0.0666486	2.7642	ns	CD	266.092
T5- 75%RDF-M0	0	267.259	477.089	744.348	248.116	RDF	1	1.29579	1.29579	1.4031e-05	4.60011	ns	MC0	263.959
T6- 75%RDF-SM	292.686	367.866	369.949	1030.5	343.5	MC	3	40385	13461.7	0.145764	3.34389	ns	SMC	330.333
T7-75%RDF-FM3	248.832	286.789	493.761	1029.38	343.127	RDFxMC	3	2699.79	899.931	0.00974455	3.34389	ns	MC3	344.43
T8-75%RDF-FM5	360.254	483.815	300.299	1144.37	381.456	Error	14	1.29293e+06	92352.2				MC5	376.548
Total	2284.58	2581.57		7891.62	328.817	Total	23	226591		t14=	2.14479		SE.m	124.065
Mean	285.573	322.696	#VALUE!			SE.m	175.454						CD	376.311
CF	2.5949e+06					CD	532.184
TSSQ	226591	RSSQ	-1.10943e+06			CV	92.4206
tSSQ	43086.1	ESSQ	1.29293e+06
N UPTAKE IN STRAW AT HARVEST (kg ha-1)
Treatments	R1	R2	R3	Total	Mean			ANOVA					Factors Mean
T1- 100%RDF-M0	123.62	167.721	146.78	438.121	146.04								1	147.071
T2- 100%RDF-SM	110.381	104.808	95.7596	310.949	103.65		df	SS	MSS	Cal F	Table F		0.75	127.435
T3-100%RDF-FM3	180.991	224.725	93.5838	499.3	166.433	Replication	2	4854.14	2427.07	1.23856	3.73889	ns	SE.m	12.7789
T4-100%RDF-FM5	196.261	182.318	137.899	516.478	172.159	Treatment	7	37505.4	5357.92	2.73419	2.7642	ns	CD	38.7607
T5- 75%RDF-M0	0	153.531	106.337	259.868	86.6225	RDF	1	2313.43	2313.43	1.18057	4.60011	ns	MC0	116.331
T6- 75%RDF-SM	76.9647	95.8343	107.758	280.557	93.519	MC	3	27813.2	9271.08	4.73111	3.34389	sig	SMC	98.5843
T7-75%RDF-FM3	111.682	112.803	149.315	373.8	124.6	RDFxMC	3	7378.77	2459.59	1.25515	3.34389	ns	MC3	145.517
T8-75%RDF-FM5	259.576	210.839	144.576	614.991	204.997	Error	14	27434.4	1959.6				MC5	188.578
Total	1059.48	1252.58	982.008	3294.06	137.253	Total	23	69793.9		t14=	2.14479		SE.m	18.0721
Mean	132.434	156.572	122.751			SE.m	25.5578						CD	54.8159
CF	452119					CD	77.5214
TSSQ	69793.9	RSSQ	4854.14			CV	32.2525
tSSQ	37505.4	ESSQ	27434.4
N UPTAKE IN GRAIN AT HARVEST (kg ha-1)
Treatments	R1	R2	R3	Total	Mean			ANOVA					Factors Mean
T1- 100%RDF-M0				0	0								1	0
T2- 100%RDF-SM				0	0		df	SS	MSS	Cal F	Table F		0.75	0
T3-100%RDF-FM3				0	0	Replication	2	0	0	#DIV/0!	3.73889	#DIV/0!	SE.m	0
T4-100%RDF-FM5				0	0	Treatment	7	0	0	#DIV/0!	2.7642	#DIV/0!	CD	0
T5- 75%RDF-M0				0	0	RDF	1	0	0	#DIV/0!	4.60011	#DIV/0!	MC0	0
T6- 75%RDF-SM				0	0	MC	3	0	0	#DIV/0!	3.34389	#DIV/0!	SMC	0
T7-75%RDF-FM3				0	0	RDFxMC	3	0	0	#DIV/0!	3.34389	#DIV/0!	MC3	0
T8-75%RDF-FM5				0	0	Error	14	0	0				MC5	0
Total	0	0	0	0	#DIV/0!	Total	23	0		t14=	2.14479		SE.m	0
Mean	0	0	0			SE.m	0						CD	0
CF	0					CD	0
TSSQ	0	RSSQ	0			CV	#DIV/0!
tSSQ	0	ESSQ	0
TOTAL N UPTAKE AT HARVEST (kg ha-1)
Treatments	R1	R2	R3	Total	Mean			ANOVA					Factors Mean
T1- 100%RDF-M0	123.62	167.721	146.78	438.121	146.04								1	147.071
T2- 100%RDF-SM	110.381	104.808	95.7596	310.949	103.65		df	SS	MSS	Cal F	Table F		0.75	127.435
T3-100%RDF-FM3	180.991	224.725	93.5838	499.3	166.433	Replication	2	4854.14	2427.07	1.23856	3.73889	ns	SE.m	12.7789
T4-100%RDF-FM5	196.261	182.318	137.899	516.478	172.159	Treatment	7	37505.4	5357.92	2.73419	2.7642	ns	CD	38.7607
T5- 75%RDF-M0	0	153.531	106.337	259.868	86.6225	RDF	1	2313.43	2313.43	1.18057	4.60011	ns	MC0	116.331
T6- 75%RDF-SM	76.9647	95.8343	107.758	280.557	93.519	MC	3	27813.2	9271.08	4.73111	3.34389	sig	SMC	98.5843
T7-75%RDF-FM3	111.682	112.803	149.315	373.8	124.6	RDFxMC	3	7378.77	2459.59	1.25515	3.34389	ns	MC3	145.517
T8-75%RDF-FM5	259.576	210.839	144.576	614.991	204.997	Error	14	27434.4	1959.6				MC5	188.578
Total	1059.48	1252.58	982.008	3294.06	137.253	Total	23	69793.9		t14=	2.14479		SE.m	18.0721
Mean	132.434	156.572	122.751			SE.m	25.5578						CD	54.8159
CF	452119					CD	77.5214
TSSQ	69793.9	RSSQ	4854.14			CV	32.2525
tSSQ	37505.4	ESSQ	27434.4
P UPTAKE AT 30 DAS (kg ha-1)
Treatments	R1	R2	R3	Total	Mean			ANOVA					Factors Mean
T1- 100%RDF-M0	3.98543	2.09646	2.05587	8.13776	2.71259								1	2.34909
T2- 100%RDF-SM	2.36872	1.84264	2.89631	7.10767	2.36922		df	SS	MSS	Cal F	Table F		0.75	1.9442
T3-100%RDF-FM3	2.58362	2.09345	2.56666	7.24372	2.41457	Replication	2	0.42108	0.21054	0.301685	3.73889	ns	SE.m	0.241157
T4-100%RDF-FM5	2.03793	2.04999	1.61205	5.69998	1.89999	Treatment	7	3.57083	0.510119	0.730955	2.7642	ns	CD	0.731474
T5- 75%RDF-M0	0	2.76305	1.58666	4.34971	1.4499	RDF	1	0.983636	0.983636	1.40946	4.60011	ns	MC0	2.08125
T6- 75%RDF-SM	2.55921	1.36345	1.47438	5.39704	1.79901	MC	3	0.124145	0.0413817	0.0592962	3.34389	ns	SMC	2.08412
T7-75%RDF-FM3	1.50007	3.1843	1.61445	6.29882	2.09961	RDFxMC	3	2.46305	0.821018	1.17645	3.34389	ns	MC3	2.25709
T8-75%RDF-FM5	2.643	2.7494	1.89242	7.28482	2.42827	Error	14	9.77033	0.69788				MC5	2.16413
Total	17.678	18.1427	15.6988	51.5195	2.14665	Total	23	13.7622		t14=	2.14479		SE.m	0.341048
Mean	2.20975	2.26784	1.96235			SE.m	0.482314						CD	1.03446
CF	110.594					CD	1.46295
TSSQ	13.7622	RSSQ	0.42108			CV	38.9162
tSSQ	3.57083	ESSQ	9.77033
P UPTAKE AT 60 DAS (kg ha-1)
Treatments	R1	R2	R3	Total	Mean			ANOVA					Factors Mean
T1- 100%RDF-M0	21.7499	27.7715	30.8175	80.3389	26.7796								1	27.696
T2- 100%RDF-SM	19.3676	27.1028	35.1793	81.6497	27.2166		df	SS	MSS	Cal F	Table F		0.75	22.5437
T3-100%RDF-FM3	18.6517	27.5808	29.7793	76.0118	25.3373	Replication	2	705.005	352.503	12.0997	3.73889	sig	SE.m	1.55813
T4-100%RDF-FM5	23.294	40.394	30.6631	94.3511	31.4504	Treatment	7	388.166	55.4523	1.9034	2.7642	ns	CD	4.7261
T5- 75%RDF-M0	0	26.6724	26.9999	53.6723	17.8908	RDF	1	159.273	159.273	5.46705	4.60011	sig	MC0	22.3352
T6- 75%RDF-SM	20.8166	19.1744	20.447	60.438	20.146	MC	3	169.055	56.3516	1.93427	3.34389	ns	SMC	23.6813
T7-75%RDF-FM3	15.6308	32.994	25.7205	74.3453	24.7818	RDFxMC	3	59.8383	19.9461	0.684651	3.34389	ns	MC3	25.0595
T8-75%RDF-FM5	20.1688	27.996	33.9043	82.069	27.3563	Error	14	407.865	29.1332				MC5	29.4034
Total	139.679	229.686	233.511	602.876	25.1198	Total	23	1501.04		t14=	2.14479		SE.m	2.20353
Mean	17.4599	28.7107	29.1889			SE.m	3.11626						CD	6.68371
CF	15144.1					CD	9.4522
TSSQ	1501.04	RSSQ	705.005			CV	21.4871
tSSQ	388.166	ESSQ	407.865
P UPTAKE AT 90 DAS (kg ha-1)
Treatments	R1	R2	R3	Total	Mean			ANOVA					Factors Mean
T1- 100%RDF-M0	58.3674	45.9998	46.3233	150.691	50.2302								1	59.0145
T2- 100%RDF-SM	61.088	54.588	59.4213	175.097	58.3658		df	SS	MSS	Cal F	Table F		0.75	58.2052
T3-100%RDF-FM3	76.5242	65.6762	55.0586	197.259	65.753	Replication	2	165.037	82.5185	0.249659	3.73889	ns	SE.m	5.24821
T4-100%RDF-FM5	65.3821	57.1566	62.588	185.127	61.7089	Treatment	7	1809.62	258.517	0.78214	2.7642	ns	CD	15.9188
T5- 75%RDF-M0	0	45.0979	80.4605	125.558	41.8528	RDF	1	3.92911	3.92911	0.0118875	4.60011	ns	MC0	46.0415
T6- 75%RDF-SM	63.4017	73.6026	55.588	192.592	64.1975	MC	3	1376.84	458.948	1.38854	3.34389	ns	SMC	61.2816
T7-75%RDF-FM3	41.6469	52.9998	72.7938	167.441	55.8135	RDFxMC	3	428.843	142.948	0.432487	3.34389	ns	MC3	60.7833
T8-75%RDF-FM5	72.9997	85.5193	54.3527	212.872	70.9572	Error	14	4627.34	330.525				MC5	66.3331
Total	439.41	480.64	486.586	1406.64	58.6099	Total	23	6602		t14=	2.14479		SE.m	7.42209
Mean	54.9263	60.08	60.8233			SE.m	10.4964						CD	22.5126
CF	82442.8					CD	31.8376
TSSQ	6602	RSSQ	165.037			CV	31.0192
tSSQ	1809.62	ESSQ	4627.34
P UPTAKE IN STRAW AT HARVEST (kg ha-1)
Treatments	R1	R2	R3	Total	Mean			ANOVA					Factors Mean
T1- 100%RDF-M0	82.5891	15.0474	24.611	122.248	40.7492								1	28.7485
T2- 100%RDF-SM	37.8448	19.5588	14.5666	71.9703	23.9901		df	SS	MSS	Cal F	Table F		0.75	18.5066
T3-100%RDF-FM3	26.4532	33.7932	18.2638	78.5102	26.1701	Replication	2	358.834	179.417	0.787942	3.73889	ns	SE.m	4.35606
T4-100%RDF-FM5	24.1988	26.7132	21.3416	72.2536	24.0845	Treatment	7	1329.58	189.94	0.834155	2.7642	ns	CD	13.2127
T5- 75%RDF-M0	0	23.6835	16.8788	40.5623	13.5208	RDF	1	629.377	629.377	2.76402	4.60011	ns	MC0	27.135
T6- 75%RDF-SM	20.361	11.4088	24.3521	56.122	18.7073	MC	3	109.506	36.502	0.160305	3.34389	ns	SMC	21.3487
T7-75%RDF-FM3	21.2727	14.7286	23.7007	59.702	19.9007	RDFxMC	3	590.696	196.899	0.864717	3.34389	ns	MC3	23.0354
T8-75%RDF-FM5	19.9674	24.5421	21.1832	65.6928	21.8976	Error	14	3187.85	227.703				MC5	22.9911
Total	232.687	169.476	164.898	567.061	23.6275	Total	23	4876.26		t14=	2.14479		SE.m	6.1604
Mean	29.0859	21.1845	20.6122			SE.m	8.71212						CD	18.6856
CF	13398.2					CD	26.4255
TSSQ	4876.26	RSSQ	358.834			CV	63.8655
tSSQ	1329.58	ESSQ	3187.85
P UPTAKE IN GRAIN AT HARVEST (kg ha-1)
Treatments	R1	R2	R3	Total	Mean			ANOVA					Factors Mean
T1- 100%RDF-M0				0	0								1	0
T2- 100%RDF-SM				0	0		df	SS	MSS	Cal F	Table F		0.75	0
T3-100%RDF-FM3				0	0	Replication	2	0	0	#DIV/0!	3.73889	#DIV/0!	SE.m	0
T4-100%RDF-FM5				0	0	Treatment	7	0	0	#DIV/0!	2.7642	#DIV/0!	CD	0
T5- 75%RDF-M0				0	0	RDF	1	0	0	#DIV/0!	4.60011	#DIV/0!	MC0	0
T6- 75%RDF-SM				0	0	MC	3	0	0	#DIV/0!	3.34389	#DIV/0!	SMC	0
T7-75%RDF-FM3				0	0	RDFxMC	3	0	0	#DIV/0!	3.34389	#DIV/0!	MC3	0
T8-75%RDF-FM5				0	0	Error	14	0	0				MC5	0
Total	0	0	0	0	#DIV/0!	Total	23	0		t14=	2.14479		SE.m	0
Mean	0	0	0			SE.m	0						CD	0
CF	0					CD	0
TSSQ	0	RSSQ	0			CV	#DIV/0!
tSSQ	0	ESSQ	0
TOTAL P UPTAKE AT HARVEST (kg ha-1)
Treatments	R1	R2	R3	Total	Mean			ANOVA					Factors Mean
T1- 100%RDF-M0	82.5891	15.0474	24.611	122.248	40.7492								1	28.7485
T2- 100%RDF-SM	37.8448	19.5588	14.5666	71.9703	23.9901		df	SS	MSS	Cal F	Table F		0.75	18.5066
T3-100%RDF-FM3	26.4532	33.7932	18.2638	78.5102	26.1701	Replication	2	358.834	179.417	0.787942	3.73889	ns	SE.m	4.35606
T4-100%RDF-FM5	24.1988	26.7132	21.3416	72.2536	24.0845	Treatment	7	1329.58	189.94	0.834155	2.7642	ns	CD	13.2127
T5- 75%RDF-M0	0	23.6835	16.8788	40.5623	13.5208	RDF	1	629.377	629.377	2.76402	4.60011	ns	MC0	27.135
T6- 75%RDF-SM	20.361	11.4088	24.3521	56.122	18.7073	MC	3	109.506	36.502	0.160305	3.34389	ns	SMC	21.3487
T7-75%RDF-FM3	21.2727	14.7286	23.7007	59.702	19.9007	RDFxMC	3	590.696	196.899	0.864717	3.34389	ns	MC3	23.0354
T8-75%RDF-FM5	19.9674	24.5421	21.1832	65.6928	21.8976	Error	14	3187.85	227.703				MC5	22.9911
Total	232.687	169.476	164.898	567.061	23.6275	Total	23	4876.26		t14=	2.14479		SE.m	6.1604
Mean	29.0859	21.1845	20.6122			SE.m	8.71212						CD	18.6856
CF	13398.2					CD	26.4255
TSSQ	4876.26	RSSQ	358.834			CV	63.8655
tSSQ	1329.58	ESSQ	3187.85
K UPTAKE AT 30 DAS (kg ha-1)
Treatments	R1	R2	R3	Total	Mean			ANOVA					Factors Mean
T1- 100%RDF-M0	19.1854	12.2472	9.92188	41.3545	13.7848								1	13.2861
T2- 100%RDF-SM	14.3877	13.8277	17.7886	46.004	15.3347		df	SS	MSS	Cal F	Table F		0.75	10.5652
T3-100%RDF-FM3	14.6212	6.9072	14.6826	36.211	12.0703	Replication	2	3.98639	1.9932	0.0950127	3.73889	ns	SE.m	1.32219
T4-100%RDF-FM5	10.3668	12.8124	12.6845	35.8638	11.9546	Treatment	7	83.8294	11.9756	0.57086	2.7642	ns	CD	4.01045
T5- 75%RDF-M0	0	14.8764	13.3132	28.1896	9.39654	RDF	1	44.4201	44.4201	2.11744	4.60011	ns	MC0	11.5907
T6- 75%RDF-SM	8.86026	7.2185	12.8065	28.8853	9.62843	MC	3	4.39762	1.46587	0.069876	3.34389	ns	SMC	12.4815
T7-75%RDF-FM3	11.7157	17.0597	8.17883	36.9542	12.3181	RDFxMC	3	35.0117	11.6706	0.556318	3.34389	ns	MC3	12.1942
T8-75%RDF-FM5	11.6707	12.4476	8.63492	32.7532	10.9177	Error	14	293.695	20.9782				MC5	11.4362
Total	90.8079	97.3966	98.011	286.216	11.9256	Total	23	381.511		t14=	2.14479		SE.m	1.86986
Mean	11.351	12.1746	12.2514			SE.m	2.64438						CD	5.67163
CF	3413.31					CD	8.02089
TSSQ	381.511	RSSQ	3.98639			CV	38.4063
tSSQ	83.8294	ESSQ	293.695
K UPTAKE AT 60 DAS (kg ha-1)
Treatments	R1	R2	R3	Total	Mean			ANOVA					Factors Mean
T1- 100%RDF-M0	93.2021	160.701	157.169	411.072	137.024								1	124.537
T2- 100%RDF-SM	75.5077	103.361	152.613	331.482	110.494		df	SS	MSS	Cal F	Table F		0.75	96.5126
T3-100%RDF-FM3	117.98	147.922	119.625	385.526	128.509	Replication	2	9094.25	4547.12	4.21052	3.73889	sig	SE.m	9.48659
T4-100%RDF-FM5	96.3596	144.533	125.465	366.358	122.119	Treatment	7	8345.04	1192.15	1.1039	2.7642	ns	CD	28.7746
T5- 75%RDF-M0	0	135.286	89.1221	224.408	74.8028	RDF	1	4712.05	4712.05	4.36323	4.60011	ns	MC0	105.913
T6- 75%RDF-SM	101.377	79.0466	114.852	295.276	98.4252	MC	3	794.527	264.842	0.245237	3.34389	ns	SMC	104.46
T7-75%RDF-FM3	89.362	99.9676	102.63	291.959	97.3197	RDFxMC	3	2838.47	946.155	0.876114	3.34389	ns	MC3	112.914
T8-75%RDF-FM5	97.6897	70.3411	178.477	346.508	115.503	Error	14	15119.2	1079.94				MC5	118.811
Total	671.478	941.158	1039.95	2652.59	110.525	Total	23	32558.5		t14=	2.14479		SE.m	13.4161
Mean	83.9347	117.645	129.994			SE.m	18.9732						CD	40.6934
CF	293176					CD	57.5492
TSSQ	32558.5	RSSQ	9094.25			CV	29.7332
tSSQ	8345.04	ESSQ	15119.2
K UPTAKE AT 90 DAS (kg ha-1)
Treatments	R1	R2	R3	Total	Mean			ANOVA					Factors Mean
T1- 100%RDF-M0	235.304	161.839	167.708	564.851	188.284								1	195.306
T2- 100%RDF-SM	191.284	199.133	209.696	600.113	200.038		df	SS	MSS	Cal F	Table F		0.75	197.152
T3-100%RDF-FM3	218.242	180.564	199.333	598.139	199.38	Replication	2	3439.61	1719.81	0.547276	3.73889	ns	SE.m	16.1825
T4-100%RDF-FM5	212.007	191.859	176.699	580.566	193.522	Treatment	7	14241.3	2034.47	0.64741	2.7642	ns	CD	49.0846
T5- 75%RDF-M0	0	207.613	218.852	426.465	142.155	RDF	1	20.4547	20.4547	0.0065091	4.60011	ns	MC0	165.219
T6- 75%RDF-SM	219.282	284.374	174.649	678.306	226.102	MC	3	8506.78	2835.59	0.902342	3.34389	ns	SMC	213.07
T7-75%RDF-FM3	174.639	186.319	224.729	585.688	195.229	RDFxMC	3	5714.08	1904.69	0.606111	3.34389	ns	MC3	197.304
T8-75%RDF-FM5	207.319	280.279	187.769	675.367	225.122	Error	14	43994.8	3142.48				MC5	209.322
Total	1458.08	1691.98	1559.44	4709.49	196.229	Total	23	61675.7		t14=	2.14479		SE.m	22.8855
Mean	182.26	211.497	194.929			SE.m	32.365						CD	69.4161
CF	924139					CD	98.1691
TSSQ	61675.7	RSSQ	3439.61			CV	28.5676
tSSQ	14241.3	ESSQ	43994.8
K UPTAKE IN STRAW AT HARVEST (kg ha-1)
Treatments	R1	R2	R3	Total	Mean			ANOVA					Factors Mean
T1- 100%RDF-M0	469.176	504.205	412.874	1386.26	462.085								1	386.591
T2- 100%RDF-SM	264.914	254.939	302.099	821.952	273.984		df	SS	MSS	Cal F	Table F		0.75	399.467
T3-100%RDF-FM3	160.767	575.329	400.197	1136.29	378.764	Replication	2	48340.5	24170.2	2.13273	3.73889	ns	SE.m	30.7314
T4-100%RDF-FM5	368.99	512.894	412.713	1294.6	431.532	Treatment	7	190716	27245.1	2.40405	2.7642	ns	CD	93.214
T5- 75%RDF-M0	0	354.017	368.726	722.743	240.914	RDF	1	994.599	994.599	0.0877611	4.60011	ns	MC0	351.5
T6- 75%RDF-SM	421.229	293.92	414.856	1130.01	376.668	MC	3	73836.4	24612.1	2.17172	3.34389	ns	SMC	325.326
T7-75%RDF-FM3	523.888	457.971	543.763	1525.62	508.541	RDFxMC	3	115885	38628.2	3.40847	3.34389	sig	MC3	443.653
T8-75%RDF-FM5	430.726	492.627	491.875	1415.23	471.743	Error	14	158662	11333				MC5	451.638
Total	2639.69	3445.9	3347.1	9432.7	393.029	Total	23	397718		t14=	2.14479		SE.m	43.4608
Mean	329.961	430.738	418.388			SE.m	61.4628						CD	131.825
CF	3.70732e+06					CD	186.428
TSSQ	397718	RSSQ	48340.5			CV	27.0862
tSSQ	190716	ESSQ	158662
K UPTAKE IN GRAIN AT HARVEST (kg ha-1)
Treatments	R1	R2	R3	Total	Mean			ANOVA					Factors Mean
T1- 100%RDF-M0				0	0								1	0
T2- 100%RDF-SM				0	0		df	SS	MSS	Cal F	Table F		0.75	0
T3-100%RDF-FM3				0	0	Replication	2	0	0	#DIV/0!	3.73889	#DIV/0!	SE.m	0
T4-100%RDF-FM5				0	0	Treatment	7	0	0	#DIV/0!	2.7642	#DIV/0!	CD	0
T5- 75%RDF-M0				0	0	RDF	1	0	0	#DIV/0!	4.60011	#DIV/0!	MC0	0
T6- 75%RDF-SM				0	0	MC	3	0	0	#DIV/0!	3.34389	#DIV/0!	SMC	0
T7-75%RDF-FM3				0	0	RDFxMC	3	0	0	#DIV/0!	3.34389	#DIV/0!	MC3	0
T8-75%RDF-FM5				0	0	Error	14	0	0				MC5	0
Total	0	0	0	0	#DIV/0!	Total	23	0		t14=	2.14479		SE.m	0
Mean	0	0	0			SE.m	0						CD	0
CF	0					CD	0
TSSQ	0	RSSQ	0			CV	#DIV/0!
tSSQ	0	ESSQ	0
TOTAL K UPTAKE AT HARVEST (kg ha-1)
Treatments	R1	R2	R3	Total	Mean			ANOVA					Factors Mean
T1- 100%RDF-M0	469.176	504.205	412.874	1386.26	462.085								1	386.591
T2- 100%RDF-SM	264.914	254.939	302.099	821.952	273.984		df	SS	MSS	Cal F	Table F		0.75	399.467
T3-100%RDF-FM3	160.767	575.329	400.197	1136.29	378.764	Replication	2	48340.5	24170.2	2.13273	3.73889	ns	SE.m	30.7314
T4-100%RDF-FM5	368.99	512.894	412.713	1294.6	431.532	Treatment	7	190716	27245.1	2.40405	2.7642	ns	CD	93.214
T5- 75%RDF-M0	0	354.017	368.726	722.743	240.914	RDF	1	994.599	994.599	0.0877611	4.60011	ns	MC0	351.5
T6- 75%RDF-SM	421.229	293.92	414.856	1130.01	376.668	MC	3	73836.4	24612.1	2.17172	3.34389	ns	SMC	325.326
T7-75%RDF-FM3	523.888	457.971	543.763	1525.62	508.541	RDFxMC	3	115885	38628.2	3.40847	3.34389	sig	MC3	443.653
T8-75%RDF-FM5	430.726	492.627	491.875	1415.23	471.743	Error	14	158662	11333				MC5	451.638
Total	2639.69	3445.9	3347.1	9432.7	393.029	Total	23	397718		t14=	2.14479		SE.m	43.4608
Mean	329.961	430.738	418.388			SE.m	61.4628						CD	131.825
CF	3.70732e+06					CD	186.428
TSSQ	397718	RSSQ	48340.5			CV	27.0862
tSSQ	190716	ESSQ	158662

## Sheet: Sheet2
		Cost of cultivation (Rs /ha) of rabi maize as influenced by different drip fertigation levels.
	S.NO.	Treatment	Land preparation	Seeds and sowing	Fertilizers cost	Cost of fertilizer application	Weed control	Plant protection	Harvesting, threshing,cleaning and packing	Transport	Cost of water (Rs. ha mm-1)	cost of irrigation	Cost of drip system	Total production cost	Grain yield yield (kg ha-1)	Income from Grain (Rs. ha-1)	Income from Straw (Rs. ha-1)	Total Gross Returns(Rs. ha-1)	Net Returns(Rs. ha-1)	B:C ratio
	1	T1- 100%RDF-M0	6000	4220	17686.2	1000	3900	3460	16000	3306.88	5412.9	1500	9600	70586	6613.76	94246	3500	97746	27160.1	1.38478
	2	T2- 100%RDF-SM	6000	4220	18186.2	1000	3900	3460	16000	3844.25	5412.9	1500	9600	71623.3	7688.49	109561	3500	113061	41437.7	1.57855
	3	T3-100%RDF-FM3	6000	4220	18186.2	1000	3900	3460	16000	3893.85	5412.9	1500	9600	71672.9	7787.7	110975	3500	114475	42801.8	1.59718
	4	T4-100%RDF-FM5	6000	4220	18186.2	1000	3900	3460	16000	4067.46	5412.9	1500	9600	71846.6	8134.92	115923	3500	119423	47576.1	1.66219
	5	T5- 75%RDF-M0	6000	4220	13264.8	1000	3900	3460	16000	3348.21	5412.9	1500	9600	64357.7	6696.43	95424.1	3500	98924.1	34566.4	1.5371
	6	T6- 75%RDF-SM	6000	4220	13764.8	1000	3900	3460	16000	3348.21	5412.9	1500	9600	64857.7	6696.43	95424.1	3500	98924.1	34066.4	1.52525
	7	T7-75%RDF-FM3	6000	4220	13764.8	1000	3900	3460	16000	3968.25	5412.9	1500	9600	64857.7	7936.51	113095	3500	116595	51737.5	1.79771
	8	T8-75%RDF-FM5	6000	4220	13764.8	1000	3900	3460	16000	4092.26	5412.9	1500	9600	64857.7	8184.52	116629	3500	120129	55271.8	1.8522
