# Supplementary material for: Conservation tillage and fertiliser management strategies impact on basmati rice (Oryza sativa L): crop performance, crop water productivity, nutrient uptake and fertility status of the soil under rice-wheat cropping system
Source: PeerJ. 2023 Nov 1;11:e16271. doi: 10.7717/peerj.16271 (PMC10625351; doi:10.7717/peerj.16271)
Supplement: Supplemental Information 4 [file peerj-11-16271-s004.xlsx]

## Sheet: WF Original
																				RF
													2019							2019	2020
																				587.6	369.8
																	IRRI
				GRAIN YIELD				GRAIN YIELD				water applied					Water productivity
				q/ha				kg/ha				(mm)
	E1T1		26.5	23.6	21.56		2650	2360	2156		1250	1250	1250			2.12	1.888	1.7248		587.6		1247.88
	E1T2		38.9	42.2	43.5		3890	4220	4350		1200	1200	1200			3.24167	3.51667	3.625		587.6
	E1T3		48.6	47.56	45.8		4860	4756	4580		1190	1190	1190			4.08403	3.99664	3.84874		587.6
	E1T4		38.6	37.8	36.2		3860	3780	3620		1170	1170	1170			3.29915	3.23077	3.09402		587.6
	E1T5		45.8	47.6	44.5		4580	4760	4450		1150	1150	1150			3.98261	4.13913	3.86957		587.6
	E1T6		51.8	49.8	47.8		5180	4980	4780		1060	1060	1060			4.88679	4.69811	4.50943		587.6
	E1T7		40.2	39.5	38.9		4020	3950	3890		1110	1110	1110			3.62162	3.55856	3.5045		587.6
	E1T8		43.5	42.5	41.9		4350	4250	4190		1090	1090	1090			3.99083	3.89908	3.84404		587.6
	E1T9		36.5	35.7	34.8		3650	3570	3480		1050	1050	1050			3.47619	3.4	3.31429		587.6
	E2T1		26.5	15.6	22.6		2650	1560	2260		1090	1090	1090			2.43119	1.43119	2.07339		587.6
	E2T2		38.5	36.4	37.8		3850	3640	3780		1060	1060	1060			3.63208	3.43396	3.56604		587.6
	E2T3		47.8	46.8	44.8		4780	4680	4480		1020	1020	1020			4.68627	4.58824	4.39216		587.6
	E2T4		36.8	35.9	39.8		3680	3590	3980		990	990	990			3.71717	3.62626	4.0202		587.6
	E2T5		36.5	45.6	42.5		3650	4560	4250		960	960	960			3.80208	4.75	4.42708		587.6
	E2T6		46.8	50.8	47.2		4680	5080	4720		840	840	840			5.57143	6.04762	5.61905		587.6
	E2T7		37.9	37.8	36.8		3790	3780	3680		920	920	920			4.11957	4.1087	4		587.6
	E2T8		40.9	41.8	43.2		4090	4180	4320		880	880	880			4.64773	4.75	4.90909		587.6
	E2T9		34.8	37.6	35.2		3480	3760	3520		827	827	827			4.20798	4.54655	4.25635		587.6
				grain yield t/ha								m3					TWU_V				Blue water foot print				Green water foot print				Grey water foot print
		E1T1	2.65	2.36	2.156					E1T1	12500	12500	12500			4716.98	5296.61	5797.77		4416.04	4958.69	5427.88		297.17	333.686	365.26		3.77358	4.23729	4.63822
		E1T2	3.89	4.22	4.35					E1T2	12000	12000	12000			3084.83	2843.6	2758.62		2888.02	2662.18	2582.62		194.344	179.147	173.793		2.46787	2.27488	2.2069
		E1T3	4.86	4.756	4.58					E1T3	11900	11900	11900			2448.56	2502.1	2598.25		2292.34	2342.47	2432.48		154.259	157.632	163.69		1.95885	2.00168	2.0786
		E1T4	3.86	3.78	3.62					E1T4	11700	11700	11700			3031.09	3095.24	3232.04		2837.7	2897.76	3025.84		190.959	195	203.619		2.42487	2.47619	2.58564
		E1T5	4.58	4.76	4.45					E1T5	11500	11500	11500			2510.92	2415.97	2584.27		2350.72	2261.83	2419.39		158.188	152.206	162.809		2.00873	1.93277	2.06742
		E1T6	5.18	4.98	4.78					E1T6	10600	10600	10600			2046.33	2128.51	2217.57		1915.78	1992.71	2076.09		128.919	134.096	139.707		1.63707	1.70281	1.77406
		E1T7	4.02	3.95	3.89					E1T7	11100	11100	11100			2761.19	2810.13	2853.47		2585.03	2630.84	2671.42		173.955	177.038	179.769		2.20896	2.2481	2.28278
		E1T8	4.35	4.25	4.19					E1T8	10900	10900	10900			2505.75	2564.71	2601.43		2345.88	2401.08	2435.46		157.862	161.576	163.89		2.0046	2.05176	2.08115
		E1T9	3.65	3.57	3.48					E1T9	10500	10500	10500			2876.71	2941.18	3017.24		2693.18	2753.53	2824.74		181.233	185.294	190.086		2.30137	2.35294	2.41379
		E2T1	2.65	1.56	2.26					E2T1	10900	10900	10900			4113.21	6987.18	4823.01		3850.78	6541.4	4515.3		259.132	440.192	303.85		3.29057	5.58974	3.85841
		E2T2	3.85	3.64	3.78					E2T2	10600	10600	10600			2753.25	2912.09	2804.23		2577.59	2726.3	2625.32		173.455	183.462	176.667		2.2026	2.32967	2.24339
		E2T3	4.78	4.68	4.48					E2T3	10200	10200	10200			2133.89	2179.49	2276.79		1997.75	2040.44	2131.53		134.435	137.308	143.438		1.70711	1.74359	1.82143
		E2T4	3.68	3.59	3.98					E2T4	9900	9900	9900			2690.22	2757.66	2487.44		2518.58	2581.72	2328.74		169.484	173.733	156.709		2.15217	2.20613	1.98995
		E2T5	3.65	4.56	4.25					E2T5	9600	9600	9600			2630.14	2105.26	2258.82		2462.33	1970.95	2114.71		165.699	132.632	142.306		2.10411	1.68421	1.80706
		E2T6	4.68	5.08	4.72					E2T6	8400	8400	8400			1794.87	1653.54	1779.66		1680.36	1548.05	1666.12		113.077	104.173	112.119		1.4359	1.32283	1.42373
		E2T7	3.79	3.78	3.68					E2T7	9200	9200	9200			2427.44	2433.86	2500		2272.57	2278.58	2340.5		152.929	153.333	157.5		1.94195	1.94709	2
		E2T8	4.09	4.18	4.32					E2T8	8800	8800	8800			2151.59	2105.26	2037.04		2014.32	1970.95	1907.07		135.55	132.632	128.333		1.72127	1.68421	1.62963
		E2T9	3.48	3.76	3.52					E2T9	8270	8270	8270			2376.44	2199.47	2349.43		2224.82	2059.14	2199.54		149.716	138.566	148.014		1.90115	1.75957	1.87955
																						PERCOLATION		Avg		WF+E				E				Total WF				Blue water foot print				Green water foot print				Grey water foot print
																				E1T1	1814.22	2037.16	2229.91	2027.1	2902.76	3259.45	3567.86		146.226	164.195	179.731		2756.53	3095.26	3388.13		2566.33	2881.68	3154.35		187.444	210.478	230.393		2.75653	3.09526	3.38813
																				E1T2	1186.47	1093.69	1061.01	1113.73	1898.36	1749.91	1697.61		95.6298	88.1517	85.5172		1802.73	1661.76	1612.1		1678.34	1547.1	1500.86		122.586	112.999	109.622		1.80273	1.66176	1.6121
																				E1T3	941.754	962.347	999.328	967.81	1506.81	1539.76	1598.93		75.9053	77.5652	80.5459		1430.9	1462.19	1518.38		1332.17	1361.3	1413.61		97.3012	99.4289	103.25		1.4309	1.46219	1.51838
																				E1T4	1165.8	1190.48	1243.09	1199.79	1865.28	1904.76	1988.95		93.9637	95.9524	100.193		1771.32	1808.81	1888.76		1649.1	1684	1758.43		120.45	122.999	128.435		1.77132	1.80881	1.88876
																				E1T5	965.737	929.218	993.95	962.968	1545.18	1486.75	1590.32		77.8384	74.895	80.1124		1467.34	1411.85	1510.21		1366.09	1314.44	1406		99.7792	96.006	102.694		1.46734	1.41185	1.51021
													2020							E1T6	787.051	818.659	852.913	819.541	1259.28	1309.85	1364.66		63.4363	65.9839	68.7448		1195.84	1243.87	1295.92		1113.33	1158.04	1206.5		81.3175	84.5832	88.1223		1.19584	1.24387	1.29592
																				E1T7	1062	1080.82	1097.49	1080.1	1699.2	1729.31	1755.98		85.597	87.1139	88.4576		1613.6	1642.19	1667.52		1502.26	1528.88	1552.47		109.725	111.669	113.392		1.6136	1.64219	1.66752
																				E1T8	963.749	986.425	1000.55	983.575	1542	1578.28	1600.88		77.6782	79.5059	80.6444		1464.32	1498.77	1520.24		1363.28	1395.36	1415.34		99.5738	101.917	103.376		1.46432	1.49877	1.52024
				GRAIN YIELD				GRAIN YIELD				water applied					Water productivity			E1T9	1106.43	1131.22	1160.48	1132.71	1770.28	1809.95	1856.76		89.1781	91.1765	93.5345		1681.11	1718.78	1763.23		1565.11	1600.18	1641.57		114.315	116.877	119.9		1.68111	1.71878	1.76323
				q/ha				kg/ha				(mm)								E2T1	1582	2687.38	1855	2041.46	2531.2	4299.8	2968.01		213.887	363.333	250.796		2317.32	3936.47	2717.21		2157.42	3664.85	2529.72		157.578	267.68	184.77		2.31732	3.93647	2.71721
	E1T1		26.5	21.8	23.56		2650	2180	2356		1263	1263	1263			2.09818	1.72605	1.8654		E2T2	1058.94	1120.03	1078.55	1085.84	1694.31	1792.05	1725.68		143.169	151.429	145.82		1551.14	1640.63	1579.86		1444.11	1527.42	1470.85		105.477	111.563	107.431		1.55114	1.64063	1.57986
	E1T2		39.56	43.6	44.5		3956	4360	4450		1212	1212	1212			3.26403	3.59736	3.67162		E2T3	820.727	838.264	875.687	844.893	1313.16	1341.22	1401.1		110.962	113.333	118.393		1202.2	1227.89	1282.71		1119.25	1143.17	1194.2		81.7497	83.4965	87.224		1.2022	1.22789	1.28271
	E1T3		49.5	48.6	46.5		4950	4860	4650		1205	1205	1205			4.10788	4.0332	3.85892		E2T4	1034.7	1060.64	956.707	1017.35	1655.52	1697.02	1530.73		139.891	143.398	129.347		1515.63	1553.62	1401.38		1411.05	1446.42	1304.69		103.063	105.646	95.2941		1.51563	1.55362	1.40138
	E1T4		39.6	38.9	36.8		3960	3890	3680		1188	1188	1188			3.33333	3.27441	3.09764		E2T5	1011.59	809.717	868.778	896.695	1618.55	1295.55	1390.05		136.767	109.474	117.459		1481.78	1186.07	1272.59		1379.54	1104.23	1184.78		100.761	80.653	86.5359		1.48178	1.18607	1.27259
	E1T5		46.5	48.9	45.6		4650	4890	4560		1168	1168	1168			3.98116	4.18664	3.90411		E2T6	690.335	635.978	684.485	670.266	1104.54	1017.57	1095.18		93.3333	85.9843	92.5424		1011.2	931.581	1002.63		941.43	867.302	933.452		68.7618	63.3475	68.1791		1.0112	0.931581	1.00263
	E1T6		52.6	50.8	48.9		5260	5080	4890		1084	1084	1084			4.8524	4.68635	4.51107		E2T7	933.631	936.101	961.538	943.757	1493.81	1497.76	1538.46		126.227	126.561	130		1367.58	1371.2	1408.46		1273.22	1276.59	1311.28		92.9956	93.2416	95.7754		1.36758	1.3712	1.40846
	E1T7		39.8	39.4	40.8		3980	3940	4080		1138	1138	1138			3.49736	3.46221	3.58524		E2T8	827.534	809.717	783.476	806.909	1324.05	1295.55	1253.56		111.883	109.474	105.926		1212.17	1186.07	1147.64		1128.53	1104.23	1068.45		82.4277	80.653	78.0392		1.21217	1.18607	1.14764
	E1T8		44.6	43.8	42.8		4460	4380	4280		1118	1118	1118			3.98927	3.91771	3.82826		E2T9	914.014	845.949	903.628	887.864	1462.42	1353.52	1445.8		123.575	114.372	122.17		1338.85	1239.15	1323.63		1246.47	1153.65	1232.3		91.0417	84.262	90.0071		1.33885	1.23915	1.32363
	E1T9		39.5	36.8	34.5		3950	3680	3450		1076	1076	1076			3.671	3.42007	3.20632
	E2T1		20.1	22.6	26.5		2010	2260	2650		1100	1100	1100			1.82727	2.05455	2.40909
	E2T2		39.8	35.1	39.5		3980	3510	3950		1065	1065	1065			3.73709	3.29577	3.70892
	E2T3		48.95	49.5	44.5		4895	4950	4450		1018	1018	1018			4.80845	4.86248	4.37132
	E2T4		38.4	37.8	35.4		3840	3780	3540		999	999	999			3.84384	3.78378	3.54354
	E2T5		37.5	47.5	43.5		3750	4750	4350		968	968	968			3.87397	4.90702	4.4938
	E2T6		47.5	53.5	47.8		4750	5350	4780		856	856	856			5.54907	6.25	5.58411
	E2T7		40.5	35.8	41.6		4050	3580	4160		928	928	928			4.36422	3.85776	4.48276
	E2T8		41.5	42.6	45.3		4150	4260	4530		884	884	884			4.69457	4.819	5.12443
	E2T9		35.6	38.6	34.5		3560	3860	3450		837	837	837			4.25329	4.61171	4.12186
				grain yield t/ha								m3					TWU_V				Blue water foot print				Green water foot print				Grey water foot print
		E1T1	2.65	2.18	2.356					E1T1	12630	12630	12630			4766.04	5793.58	5360.78		4461.96	5423.95	5018.76		300.26	364.995	337.729		3.81283	4.63486	4.28862
		E1T2	3.956	4.36	4.45					E1T2	12120	12120	12120			3063.7	2779.82	2723.6		2868.24	2602.46	2549.83		193.013	175.128	171.587		2.45096	2.22385	2.17888
		E1T3	4.95	4.86	4.65					E1T3	12050	12050	12050			2434.34	2479.42	2591.4		2279.03	2321.24	2426.07		153.364	156.204	163.258		1.94747	1.98354	2.07312
		E1T4	3.96	3.89	3.68					E1T4	11880	11880	11880			3000	3053.98	3228.26		2808.6	2859.14	3022.3		189	192.401	203.38		2.4	2.44319	2.58261
		E1T5	4.65	4.89	4.56					E1T5	11680	11680	11680			2511.83	2388.55	2561.4		2351.57	2236.16	2397.99		158.245	150.479	161.368		2.00946	1.91084	2.04912
		E1T6	5.26	5.08	4.89					E1T6	10840	10840	10840			2060.84	2133.86	2216.77		1929.36	1997.72	2075.34		129.833	134.433	139.656		1.64867	1.70709	1.77342
		E1T7	3.98	3.94	4.08					E1T7	11380	11380	11380			2859.3	2888.32	2789.22		2676.87	2704.05	2611.26		180.136	181.964	175.721		2.28744	2.31066	2.23137
		E1T8	4.46	4.38	4.28					E1T8	11180	11180	11180			2506.73	2552.51	2612.15		2346.8	2389.66	2445.49		157.924	160.808	164.565		2.00538	2.04201	2.08972
		E1T9	3.95	3.68	3.45					E1T9	10760	10760	10760			2724.05	2923.91	3118.84		2550.26	2737.37	2919.86		171.615	184.207	196.487		2.17924	2.33913	2.49507
		E2T1	2.01	2.26	2.65					E2T1	11000	11000	11000			5472.64	4867.26	4150.94		5123.48	4556.73	3886.11		344.776	306.637	261.509		4.37811	3.89381	3.32075
		E2T2	3.98	3.51	3.95					E2T2	10650	10650	10650			2675.88	3034.19	2696.2		2505.16	2840.61	2524.18		168.58	191.154	169.861		2.1407	2.42735	2.15696
		E2T3	4.895	4.95	4.45					E2T3	10180	10180	10180			2079.67	2056.57	2287.64		1946.99	1925.36	2141.69		131.019	129.564	144.121		1.66374	1.64525	1.83011
		E2T4	3.84	3.78	3.54					E2T4	9990	9990	9990			2601.56	2642.86	2822.03		2435.58	2474.24	2641.99		163.898	166.5	177.788		2.08125	2.11429	2.25763
		E2T5	3.75	4.75	4.35					E2T5	9680	9680	9680			2581.33	2037.89	2225.29		2416.64	1907.88	2083.31		162.624	128.387	140.193		2.06507	1.63032	1.78023
		E2T6	4.75	5.35	4.78					E2T6	8560	8560	8560			1802.11	1600	1790.79		1687.13	1497.92	1676.54		113.533	100.8	112.82		1.44168	1.28	1.43264
		E2T7	4.05	3.58	4.16					E2T7	9280	9280	9280			2291.36	2592.18	2230.77		2145.17	2426.8	2088.45		144.356	163.307	140.538		1.83309	2.07374	1.78462
		E2T8	4.15	4.26	4.53					E2T8	8840	8840	8840			2130.12	2075.12	1951.43		1994.22	1942.72	1826.93		134.198	130.732	122.94		1.7041	1.66009	1.56115
		E2T9	3.56	3.86	3.45					E2T9	8370	8370	8370			2351.12	2168.39	2426.09		2201.12	2030.05	2271.3		148.121	136.609	152.843		1.8809	1.73472	1.94087
																						PERCOLATION				WF+E				E				Total WF				Blue water foot print				Green water foot print				Grey water foot print
																				E1T1	1702.16	2069.13	1914.56		3063.88	3724.44	3446.22		147.747	179.601	166.184		2916.13	3544.84	3280.03		2712	3296.7	3050.43		198.297	241.049	223.042		5.83227	7.08968	6.56006
																				E1T2	1094.18	992.792	972.713		1969.52	1787.02	1750.88		94.9747	86.1743	84.4315		1874.55	1700.85	1666.45		1743.33	1581.79	1549.8		127.469	115.658	113.319		3.74909	3.4017	3.3329
																				E1T3	869.408	885.509	925.499		1564.94	1593.92	1665.9		75.4646	76.8621	80.3333		1489.47	1517.05	1585.57		1385.21	1410.86	1474.58		101.284	103.16	107.818		2.97894	3.03411	3.17113
																				E1T4	1071.43	1090.71	1152.95		1928.57	1963.28	2075.31		93	94.6735	100.076		1835.57	1868.6	1975.23		1707.08	1737.8	1836.97		124.819	127.065	134.316		3.67114	3.7372	3.95047
																				E1T5	897.081	853.053	914.787		1614.75	1535.5	1646.62		77.8667	74.045	79.4035		1536.88	1461.45	1567.21		1429.3	1359.15	1457.51		104.508	99.3786	106.57		3.07376	2.9229	3.13443
																				E1T6	736.013	762.092	791.703		1324.82	1371.77	1425.07		63.8859	66.1496	68.7198		1260.94	1305.62	1356.35		1172.67	1214.22	1261.4		85.7438	88.7819	92.2315		2.52188	2.61123	2.71269
																				E1T7	1021.18	1031.54	996.148		1838.12	1856.78	1793.07		88.6382	89.5381	86.4657		1749.48	1767.24	1706.6		1627.02	1643.54	1587.14		118.965	120.172	116.049		3.49896	3.53448	3.4132
																				E1T8	895.259	911.611	932.911		1611.47	1640.9	1679.24		77.7085	79.1279	80.9766		1533.76	1561.77	1598.26		1426.4	1452.45	1486.38		104.296	106.201	108.682		3.06752	3.12354	3.19652
																				E1T9	972.875	1044.25	1113.87		1751.18	1879.66	2004.97		84.4456	90.6413	96.6841		1666.73	1789.02	1908.28		1550.06	1663.79	1774.7		113.338	121.653	129.763		3.33346	3.57803	3.81657
																				E2T1	2104.86	1872.02	1596.52		3367.78	2995.23	2554.43		394.03	350.442	298.868		2973.75	2644.79	2255.56		2765.58	2459.66	2097.67		202.215	179.846	153.378		5.94749	5.28958	4.51112
																				E2T2	1029.18	1167	1037		1646.7	1867.19	1659.2		192.663	218.462	194.127		1454.03	1648.73	1465.07		1352.25	1533.32	1362.52		98.8742	112.114	99.6251		2.90806	3.29746	2.93015
																				E2T3	799.874	790.987	879.862		1279.8	1265.58	1407.78		149.736	148.073	164.71		1130.06	1117.51	1243.07		1050.96	1039.28	1156.05		76.8442	75.9904	84.5287		2.26012	2.23501	2.48614
																				E2T4	1000.6	1016.48	1085.4		1600.96	1626.37	1736.64		187.312	190.286	203.186		1413.65	1436.09	1533.45		1314.69	1335.56	1426.11		96.1281	97.654	104.275		2.8273	2.87218	3.0669
																				E2T5	992.821	783.806	855.88		1588.51	1254.09	1369.41		185.856	146.728	160.221		1402.66	1107.36	1209.19		1304.47	1029.85	1124.54		95.3807	75.3005	82.2247		2.80531	2.21472	2.41837
																				E2T6	693.117	615.385	688.767		1108.99	984.615	1102.03		129.752	115.2	128.937		979.236	869.415	973.09		910.69	808.556	904.974		66.5881	59.1202	66.1701		1.95847	1.73883	1.94618
																				E2T7	881.292	996.992	857.988		1410.07	1595.19	1372.78		164.978	186.637	160.615		1245.09	1408.55	1212.17		1157.93	1309.95	1127.31		84.666	95.7814	82.4273		2.49018	2.8171	2.42433
																				E2T8	819.277	798.122	750.552		1310.84	1277	1200.88		153.369	149.408	140.503		1157.47	1127.59	1060.38		1076.45	1048.66	986.153		78.7083	76.6759	72.1058		2.31495	2.25517	2.12076
																				E2T9	904.278	833.998	933.11		1446.85	1334.4	1492.98		169.281	156.124	174.678		1277.56	1178.27	1318.3		1188.13	1095.79	1226.02		86.8744	80.1225	89.6443		2.55513	2.35654	2.6366

## Sheet: Weather data
				Rainfall (mm)
				2019	2020
				0	0.2
				2.1	1.1
				0	7.2
				0	30.3
				92.3	150.4			Week	T max	T min	RH1	RH2	WS	WD	BSS	Rainfall
				8.4	23			24	41.2857	26.7143	84	60.6857	10.0286	295.714	9.07143	0
				150	19.1			25	39	25.4286	71	44.1429	17.6143	302.143	8.64286	2.1
				48	12.1			26	41.2857	26.3571	84	60.6857	10.0286	186.429	9.07143	0
				92	61.5			27	40.1429	25.1143	84.2857	46.5714	13.7857	205.714	7.61429	0
				64	55.3			28	36.1429	24.2	90.2857	69.2857	15.2871	295.714	3.14286	92.3
				3.2	0.2			29	36.4286	23.9286	87.2857	50.5714	9.12857	276.429	8	8.4
				88	4.3			30	35.2857	24.5	93.7143	68	12.7386	295.714	3	150
				0	5.1			31	35.8571	25.2429	90	46.5714	16.5271	295.714	2.32857	48
				0	0			32	34.0286	25.1857	94.7571	67.6286	4.32738	131.786	3.91429	92
				2.3	0			33	32	24.3857	94.9857	86.6857	2.16845	138.214	4.57143	64
				14.4	0			34	33.7143	24.5286	94.8286	71.3429	1.18214	189.643	7.37143	3.2
				22.9	0			35	34.8286	25.2143	93.3429	70.7286	0.725595	90	8.71429	88
				0	0			36	34.3714	25.3714	95.7571	75.9857	0.684524	135	6.7	0
				0	0			37	34.5286	25.0143	94.7714	71.4	0.51131	151.071	7.25714	0
				0	0			38	33.5	23.2143	93.6571	62.4143	0.65119	118.929	8.5	2.3
				0	0			39	31.4	22.5857	94.8429	72.3143	0.920833	122.143	6	14.4
				587.6	369.8			40	31.2143	20.5571	95.1857	60.7143	1.14345	186.429	7.95714	22.9
								41	31.9429	18.9429	93.5286	57.0143	0.844643	196.071	8.55714	0
								42	32.0429	18.4714	94.7429	60.9571	0.58869	125.357	6.74286	0
								43	30.0714	15.8714	94.1857	50.8571	1.2006	163.929	6.88571	0
								44	29.7714	15.7571	93.7429	53.7429	0.645833	163.929	7.84286	0

## Sheet: Grain Yiled
		2019
		Grain yield
Main factors	2
Sub factors	9	Total factors	18
Replications	3
Treatments	R1	R2	R3	Total	Mean									Factors Mean
E1T1	26.5	23.6	21.56	71.66	23.8867				ANOVA					1	40.4304	1		Treatments	R1	R2	R3
E1T2	38.9	42.2	43.5	124.6	41.5333		df	SS	MSS	Cal F	Table F	Result		2	38.6926	2		E1T1	2650	2360	2156			Nutrient applied
E1T3	48.6	47.56	45.8	141.96	47.32	Replication	2	4.52828	2.26414	0.429317	3.2759	NS		SE.m	0.441958			E1T2	3890	4220	4350		N1	0			8.26667
E1T4	38.6	37.8	36.2	112.6	37.5333	Treatment	17	2902.3	170.724	32.372	1.93321	S	Factor A	CD	1.2702			E1T3	4860	4756	4580		N2	150
E1T5	45.8	47.6	44.5	137.9	45.9667	Factor A	1	40.7683	40.7683	7.73031	4.13002	S		1	22.7267	9	9	E1T4	3860	3780	3620		N3	187.5
E1T6	51.8	49.8	47.8	149.4	49.8	Factor B	8	401180	50147.5	9508.76	2.22534	S		2	39.55	5	5	E1T5	4580	4760	4450		N4	71.6
E1T7	40.2	39.5	38.9	118.6	39.5333	A*B	8	-398318	-49789.8	-9440.94	2.22534	NS		3	46.8933	2	2	E1T6	5180	4980	4780		N5	150
E1T8	43.5	42.5	41.9	127.9	42.6333	Error	34	179.31	5.27382					4	37.5167	7	7	E1T7	4020	3950	3890		N6	170
E1T9	36.5	35.7	34.8	107	35.6667	Total	53	3086.14		t34=	2.03224			5	43.75	3	3	E1T8	4350	4250	4190		N7	112.5
E2T1	26.5	15.6	22.6	64.7	21.5667	SE.m	1.32587							6	49.0333	1	1	E1T9	3650	3570	3480		N8	132.5
E2T2	38.5	36.4	37.8	112.7	37.5667	CD	3.8106							7	38.5167	6	6	E2T1	2650	1560	2260		N9	20
E2T3	47.8	46.8	44.8	139.4	46.4667	CV	5.80484							8	42.3	4	4	E2T2	3850	3640	3780
E2T4	36.8	35.9	39.8	112.5	37.5									9	35.7667	8	8	E2T3	4780	4680	4480
E2T5	36.5	45.6	42.5	124.6	41.5333									SE.m	0.937534			E2T4	3680	3590	3980
E2T6	46.8	50.8	47.2	144.8	48.2667								Factor B	CD	2.6945			E2T5	3650	4560	4250
E2T7	37.9	37.8	36.8	112.5	37.5													E2T6	4680	5080	4720
E2T8	40.9	41.8	43.2	125.9	41.9667													E2T7	3790	3780	3680
E2T9	34.8	37.6	35.2	107.6	35.8667													E2T8	4090	4180	4320
Total	716.9	714.56	704.86	2136.32	39.5615													E2T9	3480	3760	3520
Mean	39.8278	39.6978	39.1589
CF	84516
TSSQ	3086.14	RSSQ	4.52828
tSSQ	2902.3	ESSQ	179.31
		Straw yield
Main factors	2
Sub factors	9	Total factors	18
Replications	3
Treatments	R1	R2	R3	Total	Mean									Factors Mean
E1T1	37.4	36.8	40.8	115	38.3333				ANOVA					1	62.7148	1
E1T2	61.2	66.2	66.2	193.6	64.5333		df	SS	MSS	Cal F	Table F	Result		2	60.9667	2
E1T3	68.9	70.2	71.6	210.7	70.2333	Replication	2	3.71593	1.85796	0.352299	3.2759	NS		SE.m	0.517491
E1T4	61.6	59.5	64.5	185.6	61.8667	Treatment	17	4870.16	286.48	54.3211	1.93321	S	Factor A	CD	1.48728
E1T5	70.4	66.8	66.8	204	68	Factor A	1	41.2563	41.2563	7.82285	4.13002	S		1	37.2167	9	9
E1T6	71.2	77.1	67.6	215.9	71.9667	Factor B	8	956916	119615	22680.8	2.22534	S		2	63.6833	5	5
E1T7	63.5	60.8	64.6	188.9	62.9667	A*B	8	-952087	-119011	-22566.4	2.22534	NS		3	69.3167	2	2
E1T8	68.8	64.6	65.9	199.3	66.4333	Error	34	245.837	7.23051					4	61.1167	7	7
E1T9	59.9	61.6	58.8	180.3	60.1	Total	53	5119.71		t34=	2.03224			5	67.25	3	3
E2T1	35.7	33.2	39.4	108.3	36.1	SE.m	1.55247							6	71.2	1	1
E2T2	60.5	64.2	63.8	188.5	62.8333	CD	4.46185							7	62.1833	6	6
E2T3	69.8	64.6	70.8	205.2	68.4	CV	4.3482							8	65.55	4	4
E2T4	58.9	59.1	63.1	181.1	60.3667									9	59.05	8	8
E2T5	63.5	69.2	66.8	199.5	66.5									SE.m	1.09776
E2T6	71.6	73.2	66.5	211.3	70.4333								Factor B	CD	3.155
E2T7	61.8	63.6	58.8	184.2	61.4
E2T8	62.2	65.6	66.2	194	64.6667
E2T9	59.8	58.5	55.7	174	58
Total	1106.7	1114.8	1117.9	3339.4	61.8407
Mean	61.4833	61.9333	62.1056
CF	206511
TSSQ	5119.71	RSSQ	3.71593
tSSQ	4870.16	ESSQ	245.837
		Biological yield
Main factors	2
Sub factors	9	Total factors	18
Replications	3
Treatments	R1	R2	R3	Total	Mean									Factors Mean
E1T1	63.9	60.4	62.36	186.66	62.22				ANOVA					1	103.145	1
E1T2	100.1	108.4	109.7	318.2	106.067		df	SS	MSS	Cal F	Table F	Result		2	99.6593	2
E1T3	117.5	117.76	117.4	352.66	117.553	Replication	2	1.43413	0.717067	0.135967	3.2759	NS		SE.m	0.791239
E1T4	100.2	97.3	100.7	298.2	99.4	Treatment	17	15082	887.178	168.223	1.93321	S	Factor A	CD	2.27404
E1T5	116.2	114.4	111.3	341.9	113.967	Factor A	1	164.048	164.048	31.106	4.13002	S		1	59.9433	9	9
E1T6	123	126.9	115.4	365.3	121.767	Factor B	8	2.59587e+06	324484	61527.3	2.22534	S		2	103.233	5	5
E1T7	103.7	100.3	103.5	307.5	102.5	A*B	8	-2.58095e+06	-322619	-61173.7	2.22534	NS		3	116.21	2	2
E1T8	112.3	107.1	107.8	327.2	109.067	Error	34	574.723	16.9036					4	98.6333	7	7
E1T9	96.4	97.3	93.6	287.3	95.7667	Total	53	15658.2		t34=	2.03224			5	111	3	3
E2T1	62.2	48.8	62	173	57.6667	SE.m	2.37372							6	120.233	1	1
E2T2	99	100.6	101.6	301.2	100.4	CD	6.82213							7	100.7	6	6
E2T3	117.6	111.4	115.6	344.6	114.867	CV	4.05455							8	107.85	4	4
E2T4	95.7	95	102.9	293.6	97.8667									9	94.8167	8	8
E2T5	100	114.8	109.3	324.1	108.033									SE.m	1.67847
E2T6	118.4	124	113.7	356.1	118.7								Factor B	CD	4.82397
E2T7	99.7	101.4	95.6	296.7	98.9
E2T8	103.1	107.4	109.4	319.9	106.633
E2T9	94.6	96.1	90.9	281.6	93.8667
Total	1823.6	1829.36	1822.76	5475.72	101.402
Mean	101.311	101.631	101.264
CF	555250
TSSQ	15658.2	RSSQ	1.43413
tSSQ	15082	ESSQ	574.723
		Harvest Index
Main factors	2
Sub factors	9	Total factors	18
Replications	3
Treatments	R1	R2	R3	Total	Mean									Factors Mean
E1T1	41.471	39.0728	34.5734	115.117	38.3724				ANOVA					1	39.0807	1
E1T2	38.8611	38.9299	39.6536	117.445	39.1482		df	SS	MSS	Cal F	Table F	Result		2	38.6387	2
E1T3	41.3617	40.3872	39.0119	120.761	40.2536	Replication	2	7.15382	3.57691	0.678239	3.2759	NS		SE.m	0.352377
E1T4	38.523	38.8489	35.9484	113.32	37.7734	Treatment	17	78.2196	4.60115	0.872452	1.93321	NS	Factor A	CD	1.01274
E1T5	39.4148	41.6084	39.982	121.005	40.3351	Factor A	1	2.63692	2.63692	0.500003	4.13002	NS		1	37.6901	9	9
E1T6	42.1138	39.2435	41.4211	122.778	40.9262	Factor B	8	365393	45674.1	8660.53	2.22534	S		2	38.2869	5	5
E1T7	38.7657	39.3819	37.5845	115.732	38.5774	A*B	8	-365317	-45664.6	-8658.74	2.22534	NS		3	40.362	2	2
E1T8	38.7355	39.6825	38.8683	117.286	39.0954	Error	34	113.988	3.35259					4	38.0403	7	7
E1T9	37.8631	36.6906	37.1795	111.733	37.2444	Total	53	199.361		t34=	2.03224			5	39.3517	3	3
E2T1	42.6045	31.9672	36.4516	111.023	37.0078	SE.m	1.05713							6	40.7977	1	1
E2T2	38.8889	36.1829	37.2047	112.277	37.4255	CD	3.03823							7	38.253	6	6
E2T3	40.6463	42.0108	38.7543	121.411	40.4705	CV	4.71184							8	39.2274	4	4
E2T4	38.4535	37.7895	38.6783	114.921	38.3071									9	37.7282	8	8
E2T5	36.5	39.7213	38.8838	115.105	38.3684									SE.m	0.747505
E2T6	39.527	40.9677	41.5128	122.008	40.6692								Factor B	CD	2.14835
E2T7	38.014	37.2781	38.4937	113.786	37.9286
E2T8	39.6702	38.9199	39.4881	118.078	39.3594
E2T9	36.7865	39.1259	38.7239	114.636	38.2121
Total	708.201	697.809	692.414	2098.42	38.8597
Mean	39.3445	38.7672	38.4674
CF	81544.1
TSSQ	199.361	RSSQ	7.15382
tSSQ	78.2196	ESSQ	113.988
		2020
		Grain yield
Main factors	2
Sub factors	9	Total factors	18
Replications	3
Treatments	R1	R2	R3	Total	Mean									Factors Mean
E1T1	26.5	21.8	23.56	71.86	23.9533				ANOVA					1	41.2859	1	1
E1T2	39.56	43.6	44.5	127.66	42.5533		df	SS	MSS	Cal F	Table F	Result		2	39.6833	2	2
E1T3	49.5	48.6	46.5	144.6	48.2	Replication	2	4.76578	2.38289	0.451834	3.2759	NS		SE.m	0.490755
E1T4	39.6	38.9	36.8	115.3	38.4333	Treatment	17	2997.04	176.296	33.4286	1.93321	S	Factor A	CD	1.41044
E1T5	46.5	48.9	45.6	141	47	Factor A	1	34.6721	34.6721	6.57438	4.13002	S		1	23.51	9	9
E1T6	52.6	50.8	48.9	152.3	50.7667	Factor B	8	419984	52497.9	9954.45	2.22534	S		2	40.3433	5	5
E1T7	39.8	39.4	40.8	120	40	A*B	8	-417021	-52127.7	-9884.23	2.22534	NS		3	47.925	2	2
E1T8	44.6	43.8	42.8	131.2	43.7333	Error	34	221.091	6.50269					4	37.8167	7	7
E1T9	39.5	36.8	34.5	110.8	36.9333	Total	53	3222.9		t34=	2.03224			5	44.9167	3	3
E2T1	20.1	22.6	26.5	69.2	23.0667	SE.m	1.47226							6	50.1833	1	1
E2T2	39.8	35.1	39.5	114.4	38.1333	CD	4.23133							7	39.65	6	6
E2T3	48.95	49.5	44.5	142.95	47.65	CV	6.29878							8	43.4333	4	4
E2T4	38.4	37.8	35.4	111.6	37.2									9	36.5833	8	8
E2T5	37.5	47.5	43.5	128.5	42.8333									SE.m	1.04105
E2T6	47.5	53.5	47.8	148.8	49.6								Factor B	CD	2.992
E2T7	40.5	35.8	41.6	117.9	39.3
E2T8	41.5	42.6	45.3	129.4	43.1333
E2T9	35.6	38.6	34.5	108.7	36.2333
Total	728.01	735.6	722.56	2186.17	40.4846
Mean	40.445	40.8667	40.1422
CF	88506.3
TSSQ	3222.9	RSSQ	4.76578
tSSQ	2997.04	ESSQ	221.091
		Straw yield
Main factors	2
Sub factors	9	Total factors	18
Replications	3
Treatments	R1	R2	R3	Total	Mean									Factors Mean
E1T1	39.2	38.5	42.2	119.9	39.9667				ANOVA					1	63.7926	1	1
E1T2	65.5	64.1	66.5	196.1	65.3667		df	SS	MSS	Cal F	Table F	Result		2	62.0963	2	2
E1T3	69.2	71.8	73.8	214.8	71.6	Replication	2	1.77333	0.886667	0.168126	3.2759	NS		SE.m	0.646318
E1T4	61.9	60.9	63.9	186.7	62.2333	Treatment	17	4759.53	279.972	53.0872	1.93321	S	Factor A	CD	1.85754
E1T5	70.2	68.9	67.8	206.9	68.9667	Factor A	1	38.8452	38.8452	7.36566	4.13002	S		1	38.7167	9	9
E1T6	72.5	76.5	69.8	218.8	72.9333	Factor B	8	989096	123637	23443.5	2.22534	S		2	64.3833	5	5
E1T7	65.2	62.5	65.2	192.9	64.3	A*B	8	-984375	-123047	-23331.7	2.22534	NS		3	69.7667	2	2
E1T8	70.8	62.9	68.8	202.5	67.5	Error	34	383.473	11.2786					4	61.5333	7	7
E1T9	60.1	64.2	59.5	183.8	61.2667	Total	53	5144.77		t34=	2.03224			5	68.35	3	3
E2T1	36.5	35.5	40.4	112.4	37.4667	SE.m	1.93895							6	72.5333	1	1
E2T2	63.6	64.1	62.5	190.2	63.4	CD	5.57261							7	63.75	6	6
E2T3	71.5	62.5	69.8	203.8	67.9333	CV	5.33545							8	67.2167	4	4
E2T4	61.5	58.5	62.5	182.5	60.8333									9	60.25	8	8
E2T5	63.6	71.7	67.9	203.2	67.7333									SE.m	1.37105
E2T6	72.6	75.2	68.6	216.4	72.1333								Factor B	CD	3.94043
E2T7	63.2	65.5	60.9	189.6	63.2
E2T8	62.8	70.9	67.1	200.8	66.9333
E2T9	66.5	59.8	51.4	177.7	59.2333
Total	1136.4	1134	1128.6	3399	62.9444
Mean	63.1333	63	62.7
CF	213948
TSSQ	5144.77	RSSQ	1.77333
tSSQ	4759.53	ESSQ	383.473
		Biological yield
Main factors	2
Sub factors	9	Total factors	18
Replications	3
Treatments	R1	R2	R3	Total	Mean									Factors Mean
E1T1	65.7	60.3	65.76	191.76	63.92				ANOVA					1	105.079	1
E1T2	105.06	107.7	111	323.76	107.92		df	SS	MSS	Cal F	Table F	Result		2	101.78	2
E1T3	118.7	120.4	120.3	359.4	119.8	Replication	2	10.0469	5.02345	0.952525	3.2759	NS		SE.m	0.881524
E1T4	101.5	99.8	100.7	302	100.667	Treatment	17	15086	887.413	168.268	1.93321	S	Factor A	CD	2.53353
E1T5	116.7	117.8	113.4	347.9	115.967	Factor A	1	146.916	146.916	27.8576	4.13002	S		1	62.2267	9	9
E1T6	125.1	127.3	118.7	371.1	123.7	Factor B	8	2.69646e+06	337058	63911.5	2.22534	S		2	104.727	5	5
E1T7	105	101.9	106	312.9	104.3	A*B	8	-2.68152e+06	-335190	-63557.4	2.22534	NS		3	117.692	2	2
E1T8	115.4	106.7	111.6	333.7	111.233	Error	34	713.364	20.9813					4	99.35	7	7
E1T9	99.6	101	94	294.6	98.2	Total	53	15809.4		t34=	2.03224			5	113.267	3	3
E2T1	56.6	58.1	66.9	181.6	60.5333	SE.m	2.64457							6	122.717	1	1
E2T2	103.4	99.2	102	304.6	101.533	CD	7.60058							7	103.4	6	6
E2T3	120.45	112	114.3	346.75	115.583	CV	4.42867							8	110.65	4	4
E2T4	99.9	96.3	97.9	294.1	98.0333									9	96.8333	8	8
E2T5	101.1	119.2	111.4	331.7	110.567									SE.m	1.87
E2T6	120.1	128.7	116.4	365.2	121.733								Factor B	CD	5.37442
E2T7	103.7	101.3	102.5	307.5	102.5
E2T8	104.3	113.5	112.4	330.2	110.067
E2T9	102.1	98.4	85.9	286.4	95.4667
Total	1864.41	1869.6	1851.16	5585.17	103.429
Mean	103.578	103.867	102.842
CF	577669
TSSQ	15809.4	RSSQ	10.0469
tSSQ	15086	ESSQ	713.364
		Harvest Index
Main factors	2
Sub factors	9	Total factors	18
Replications	3
Treatments	R1	R2	R3	Total	Mean									Factors Mean
E1T1	40.3349	36.1526	35.8273	112.315	37.4382				ANOVA					1	39.1268	1
E1T2	37.6547	40.4828	40.0901	118.228	39.4092		df	SS	MSS	Cal F	Table F	Result		2	38.8622	2
E1T3	41.7018	40.3654	38.6534	120.721	40.2402	Replication	2	0.703536	0.351768	0.0667008	3.2759	NS		SE.m	0.357729
E1T4	39.0148	38.978	36.5442	114.537	38.179	Treatment	17	82.8068	4.87099	0.923617	1.93321	NS	Factor A	CD	1.02812
E1T5	39.8458	41.511	40.2116	121.568	40.5228	Factor A	1	0.945057	0.945057	0.179198	4.13002	NS		1	37.7228	9	9
E1T6	42.0464	39.9057	41.1963	123.148	41.0495	Factor B	8	368010	46001.3	8722.58	2.22534	S		2	38.4712	5	5
E1T7	37.9048	38.6654	38.4906	115.061	38.3536	A*B	8	-367928	-45991.1	-8720.63	2.22534	NS		3	40.7482	2	2
E1T8	38.6482	41.0497	38.3513	118.049	39.3497	Error	34	117.477	3.4552					4	38.0645	7	7
E1T9	39.6586	36.4356	36.7021	112.796	37.5988	Total	53	200.987		t34=	2.03224			5	39.593	3	3
E2T1	35.5124	38.8985	39.6114	114.022	38.0074	SE.m	1.07319							6	40.8889	1	1
E2T2	38.4913	35.3831	38.7255	112.6	37.5333	CD	3.08437							7	38.3403	6	6
E2T3	40.6393	44.1964	38.9326	123.768	41.2561	CV	4.76687							8	39.279	4	4
E2T4	38.4384	39.2523	36.1593	113.85	37.95									9	37.8425	8	8
E2T5	37.092	39.849	39.0485	115.989	38.6632									SE.m	0.758859
E2T6	39.5504	41.5695	41.0653	122.185	40.7284								Factor B	CD	2.18098
E2T7	39.055	35.3406	40.5854	114.981	38.327
E2T8	39.7891	37.533	40.3025	117.625	39.2082
E2T9	34.8678	39.2276	40.163	114.258	38.0861
Total	700.245	704.796	700.66	2105.7	38.9945
Mean	38.9025	39.1554	38.9256
CF	82110.7
TSSQ	200.987	RSSQ	0.703536
tSSQ	82.8068	ESSQ	117.477

## Sheet: water extraction pattern
			2019						2020
	Treatments	Total Soil Water Extraction (mm)				Total moisture depletion (mm)	Total Soil Water Extraction (mm)				Total moisture depletion (mm)
		Depth of soil (cm)					Depth of soil (cm)
		0-15	15-30	30-60	60-90		0-15	15-30	30-60	60-90
	P1 CT-TPR	364	300	159	79	902	274.5	226.5	120.75	60.75	682.5
	P2 WB-TPR	317	227	198	121	863	239.25	171.75	150	92.25	653.25
	P3 RT-TPR	331	250	173	94	848	249.75	189	131.25	72	642
	Mean	337.333	259	176.667	98	871	254.5	195.75	134	75	659.25

## Sheet: Water foot print
																				RF
													2019							2019	2020
																				587.6	369.8
																	Total											IRRI													WP-E
				GRAIN YIELD				GRAIN YIELD				water applied					Water productivity											Water productivity													Water productivity
				q/ha				kg/ha				(mm)																				E
	E1T1		26.5	23.6	21.56		2650	2360	2156		12500	12500	12500			0.212	0.1888	0.17248		587.6		11912.4	11912.4	11912.4			0.222457	0.198113	0.180988		193.396	217.161	237.709		12306.6	12282.8	12262.3			0.215332	0.192138	0.175824
	E1T2		38.9	42.2	43.5		3890	4220	4350		12000	12000	12000			0.324167	0.351667	0.3625		587.6		11412.4	11412.4	11412.4			0.340857	0.369773	0.381164		124.275	126.905	132.514		11875.7	11873.1	11867.5			0.327559	0.355425	0.366548
	E1T3		48.6	47.56	45.8		4860	4756	4580		11900	11900	11900			0.408403	0.399664	0.384874		587.6		11312.4	11312.4	11312.4			0.429617	0.420424	0.404865		126.478	116.588	113.103		11773.5	11783.4	11786.9			0.412791	0.403618	0.388567
	E1T4		38.6	37.8	36.2		3860	3780	3620		11700	11700	11700			0.329915	0.323077	0.309402		587.6		11112.4	11112.4	11112.4			0.34736	0.340161	0.325762		113.209	115.215	116.992		11586.8	11584.8	11583			0.333138	0.32629	0.312527
	E1T5		45.8	47.6	44.5		4580	4760	4450		11500	11500	11500			0.398261	0.413913	0.386957		587.6		10912.4	10912.4	10912.4			0.419706	0.436201	0.407793		117.945	120.588	123.707		11382.1	11379.4	11376.3			0.402388	0.418299	0.391164
	E1T6		51.8	49.8	47.8		5180	4980	4780		10600	10600	10600			0.488679	0.469811	0.450943		587.6		10012.4	10012.4	10012.4			0.517358	0.497383	0.477408		102.736	105.153	106.659		10497.3	10494.8	10493.3			0.493462	0.474519	0.455527
	E1T7		40.2	39.5	38.9		4020	3950	3890		11100	11100	11100			0.362162	0.355856	0.35045		587.6		10512.4	10512.4	10512.4			0.382406	0.375747	0.370039		102.948	99.0546	105.955		10997.1	11000.9	10994			0.365553	0.35906	0.353828
	E1T8		43.5	42.5	41.9		4350	4250	4190		10900	10900	10900			0.399083	0.389908	0.384404		587.6		10312.4	10312.4	10312.4			0.421822	0.412125	0.406307		100.391	102.586	106.528		10799.6	10797.4	10793.5			0.402792	0.393613	0.388198
	E1T9		36.5	35.7	34.8		3650	3570	3480		10500	10500	10500			0.347619	0.34	0.331429		587.6		9912.4	9912.4	9912.4			0.368226	0.360155	0.351075		83.8996	87.2691	90.9205		10416.1	10412.7	10409.1			0.350419	0.34285	0.334324
	E2T1		26.5	15.6	22.6		2650	1560	2260		10900	10900	10900			0.243119	0.143119	0.207339		587.6		10312.4	10312.4	10312.4			0.256972	0.151274	0.219154		168.642	286.474	197.743		10731.4	10613.5	10702.3			0.24694	0.146982	0.21117
	E2T2		38.5	36.4	37.8		3850	3640	3780		10600	10600	10600			0.363208	0.343396	0.356604		587.6		10012.4	10012.4	10012.4			0.384523	0.363549	0.377532		86.087	88.2451	79.598		10513.9	10511.8	10520.4			0.366181	0.346279	0.359302
	E2T3		47.8	46.8	44.8		4780	4680	4480		10200	10200	10200			0.468627	0.458824	0.439216		587.6		9612.4	9612.4	9612.4			0.497274	0.486871	0.466065		88.1039	93.1868	89.7354		10111.9	10106.8	10110.3			0.472711	0.463054	0.443114
	E2T4		36.8	35.9	39.8		3680	3590	3980		9900	9900	9900			0.371717	0.362626	0.40202		587.6		9312.4	9312.4	9312.4			0.395172	0.385507	0.427387		77.6781	77.8836	80		9822.32	9822.12	9820			0.374657	0.365502	0.405295
	E2T5		36.5	45.6	42.5		3650	4560	4250		9600	9600	9600			0.380208	0.475	0.442708		587.6		9012.4	9012.4	9012.4			0.404998	0.50597	0.471573		76.046	70.383	75.1818		9523.95	9529.62	9524.82			0.383244	0.478508	0.446203
	E2T6		46.8	50.8	47.2		4680	5080	4720		8400	8400	8400			0.557143	0.604762	0.561905		587.6		7812.4	7812.4	7812.4			0.599048	0.650248	0.604168		68.8509	67.3684	65.1852		8331.15	8332.63	8334.81			0.561747	0.609651	0.566299
	E2T7		37.9	37.8	36.8		3790	3780	3680		9200	9200	9200			0.411957	0.41087	0.4		587.6		8612.4	8612.4	8612.4			0.440063	0.438902	0.427291		84.1644	67.3684	72.2824		9115.84	9132.63	9127.72			0.41576	0.4139	0.403168
	E2T8		40.9	41.8	43.2		4090	4180	4320		8800	8800	8800			0.464773	0.475	0.490909		587.6		8212.4	8212.4	8212.4			0.498027	0.508986	0.526034		68.2845	69.7436	72.8571		8731.72	8730.26	8727.14			0.468407	0.478795	0.495007
	E2T9		34.8	37.6	35.2		3480	3760	3520		8270	8270	8270			0.420798	0.454655	0.425635		587.6		7682.4	7682.4	7682.4			0.452983	0.48943	0.45819		57.4359	52.9134	56.9492		8212.56	8217.09	8213.05			0.423741	0.457583	0.428586
				grain yield t/ha								m3					TWU_V				Blue water foot print				Green water foot print				Grey water foot print							water applied
		E1T1	2.65	2.36	2.156					E1T1	125000	125000	125000			4716.98	5296.61	5797.77		4416.04	4958.69	5427.88		297.17	333.686	365.26		3.77358	4.23729	4.63822						(mm)
		E1T2	3.89	4.22	4.35					E1T2	120000	120000	120000			3031.09	3095.24	3232.04		2837.7	2897.76	3025.84		190.959	195	203.619		2.42487	2.47619	2.58564					1250	1250	1250
		E1T3	4.86	4.756	4.58					E1T3	119000	119000	119000			3084.83	2843.6	2758.62		2888.02	2662.18	2582.62		194.344	179.147	173.793		2.46787	2.27488	2.2069					1200	1200	1200
		E1T4	3.86	3.78	3.62					E1T4	117000	117000	117000			2761.19	2810.13	2853.47		2585.03	2630.84	2671.42		173.955	177.038	179.769		2.20896	2.2481	2.28278					1190	1190	1190
		E1T5	4.58	4.76	4.45					E1T5	115000	115000	115000			2876.71	2941.18	3017.24		2693.18	2753.53	2824.74		181.233	185.294	190.086		2.30137	2.35294	2.41379					1170	1170	1170
		E1T6	5.18	4.98	4.78					E1T6	106000	106000	106000			2505.75	2564.71	2601.43		2345.88	2401.08	2435.46		157.862	161.576	163.89		2.0046	2.05176	2.08115					1150	1150	1150
		E1T7	4.02	3.95	3.89					E1T7	111000	111000	111000			2510.92	2415.97	2584.27		2350.72	2261.83	2419.39		158.188	152.206	162.809		2.00873	1.93277	2.06742					1060	1060	1060
		E1T8	4.35	4.25	4.19					E1T8	109000	109000	109000			2448.56	2502.1	2598.25		2292.34	2342.47	2432.48		154.259	157.632	163.69		1.95885	2.00168	2.0786					1110	1110	1110
		E1T9	3.65	3.57	3.48					E1T9	105000	105000	105000			2046.33	2128.51	2217.57		1915.78	1992.71	2076.09		128.919	134.096	139.707		1.63707	1.70281	1.77406					1090	1090	1090
		E2T1	2.65	1.56	2.26					E2T1	109000	109000	109000			4113.21	6987.18	4823.01		3850.78	6541.4	4515.3		259.132	440.192	303.85		3.29057	5.58974	3.85841					1050	1050	1050
		E2T2	3.85	3.64	3.78					E2T2	106000	106000	106000			2690.22	2757.66	2487.44		2518.58	2581.72	2328.74		169.484	173.733	156.709		2.15217	2.20613	1.98995					1090	1090	1090
		E2T3	4.78	4.68	4.48					E2T3	102000	102000	102000			2753.25	2912.09	2804.23		2577.59	2726.3	2625.32		173.455	183.462	176.667		2.2026	2.32967	2.24339					1060	1060	1060
		E2T4	3.68	3.59	3.98					E2T4	99000	99000	99000			2427.44	2433.86	2500		2272.57	2278.58	2340.5		152.929	153.333	157.5		1.94195	1.94709	2					1020	1020	1020
		E2T5	3.65	4.56	4.25					E2T5	96000	96000	96000			2376.44	2199.47	2349.43		2224.82	2059.14	2199.54		149.716	138.566	148.014		1.90115	1.75957	1.87955					990	990	990
		E2T6	4.68	5.08	4.72					E2T6	84000	84000	84000			2151.59	2105.26	2037.04		2014.32	1970.95	1907.07		135.55	132.632	128.333		1.72127	1.68421	1.62963					960	960	960
		E2T7	3.79	3.78	3.68					E2T7	92000	92000	92000			2630.14	2105.26	2258.82		2462.33	1970.95	2114.71		165.699	132.632	142.306		2.10411	1.68421	1.80706					840	840	840
		E2T8	4.09	4.18	4.32					E2T8	88000	88000	88000			2133.89	2179.49	2276.79		1997.75	2040.44	2131.53		134.435	137.308	143.438		1.70711	1.74359	1.82143					920	920	920
		E2T9	3.48	3.76	3.52					E2T9	82700	82700	82700			1794.87	1653.54	1779.66		1680.36	1548.05	1666.12		113.077	104.173	112.119		1.4359	1.32283	1.42373					880	880	880
																																			827	827	827
																						PERCOLATION		Avg		WF+E				E				Total WF				Blue water foot print				Green water foot print				Grey water foot print
																				E1T1	1572	1777	1545	1631.33	3144.98	3519.61	4252.77		193.396	217.161	237.709		2951.58	3302.45	4015.06		2747.93	3074.58	3738.03		200.708	224.567	273.024		2.95158	3.30245	4.01506
																				E1T2	1105	1210.64	1137	1150.88	1926.09	1884.6	2095.04		124.275	126.905	132.514		1801.81	1757.69	1962.53		1677.49	1636.41	1827.12		122.523	119.523	133.452		1.80181	1.75769	1.96253
																				E1T3	1249	1230	1228.55	1235.85	1835.83	1613.6	1530.07		126.478	116.588	113.103		1709.35	1497.01	1416.97		1591.41	1393.72	1319.2		116.236	101.797	96.3537		1.70935	1.49701	1.41697
																				E1T4	1083.63	1086.1	1111.54	1093.76	1677.56	1724.03	1741.93		113.209	115.215	116.992		1564.35	1608.81	1624.94		1456.41	1497.8	1512.82		106.376	109.399	110.496		1.56435	1.60881	1.62494
																				E1T5	1034	1026	1053.63	1037.88	1842.71	1915.18	1963.61		117.945	120.588	123.707		1724.77	1794.59	1839.91		1605.76	1670.76	1712.95		117.284	122.032	125.114		1.72477	1.79459	1.83991
													2020							E1T6	958	959.717	953	956.906	1547.75	1604.99	1648.43		102.736	105.153	106.659		1445.01	1499.84	1541.77		1345.31	1396.35	1435.39		98.2608	101.989	104.841		1.44501	1.49984	1.54177
																				E1T7	1161.59	959.717	1018.78	1046.7	1349.33	1456.25	1565.49		102.948	99.0546	105.955		1246.38	1357.2	1459.54		1160.38	1263.55	1358.83		84.7537	92.2893	99.2485		1.24638	1.3572	1.45954
																				E1T8	970.727	988.264	1025.69	994.893	1477.83	1513.84	1572.57		100.391	102.586	106.528		1377.44	1411.25	1466.04		1282.4	1313.88	1364.88		93.666	95.9651	99.6906		1.37744	1.41125	1.46604
				GRAIN YIELD				GRAIN YIELD				water applied					Water productivity			E1T9	840.335	785.978	834.485	820.266	1206	1342.54	1383.09		83.8996	87.2691	90.9205		1122.1	1255.27	1292.17		1044.67	1168.65	1203.01		76.3026	85.3581	87.8674		1.1221	1.25527	1.29217
				q/ha				kg/ha				(mm)								E2T1	1364	1387.16	1380	1377.05	2749.21	5600.02	3443.01		168.642	286.474	197.743		2580.57	5313.55	3245.27		2376.7	4893.78	2988.89		201.284	414.457	253.131		2.58057	5.31355	3.24527
	E1T1		26.5	21.8	23.56		2650	2180	2356		12630	12630	12630			0.209818	0.172605	0.18654		E2T2	1295.8	1320.48	1373.09	1329.79	1394.41	1437.18	1114.34		86.087	88.2451	79.598		1308.33	1348.94	1034.75		1204.97	1242.37	953		102.05	105.217	80.7101		1.30833	1.34894	1.03475
	E1T2		39.56	43.6	44.5		3956	4360	4450		12120	12120	12120			0.326403	0.359736	0.367162		E2T3	1216	1274	1231	1240.33	1537.25	1638.09	1573.23		88.1039	93.1868	89.7354		1449.14	1544.9	1483.5		1334.66	1422.85	1366.3		113.033	120.502	115.713		1.44914	1.5449	1.4835
	E1T3		49.5	48.6	46.5		4950	4860	4650		12050	12050	12050			0.410788	0.40332	0.385892		E2T4	1202	1210.82	1217	1209.94	1225.44	1223.04	1283		77.6781	77.8836	80		1147.76	1145.16	1203		1057.09	1054.69	1107.96		89.5255	89.3226	93.834		1.14776	1.14516	1.203
	E1T4		39.6	38.9	36.8		3960	3890	3680		11880	11880	11880			0.333333	0.327441	0.309764		E2T5	1246	1251	1290.48	1262.49	1130.44	948.468	1058.95		76.046	70.383	75.1818		1054.39	878.085	983.773		971.094	808.716	906.055		82.2425	68.4906	76.7343		1.05439	0.878085	0.983773
	E1T5		46.5	48.9	45.6		4650	4890	4560		11680	11680	11680			0.398116	0.418664	0.390411		E2T6	1114	1116.43	1111	1113.81	1037.59	988.838	926.037		68.8509	67.3684	65.1852		968.738	921.469	860.852		892.208	848.673	792.845		75.5616	71.8746	67.1464		0.968738	0.921469	0.860852
	E1T6		52.6	50.8	48.9		5260	5080	4890		10840	10840	10840			0.48524	0.468635	0.451107		E2T7	1116	1059.22	1104	1093.07	1514.14	1046.05	1154.82		84.1644	67.3684	72.2824		1429.97	978.677	1082.54		1317	901.361	997.02		111.538	76.3368	84.4382		1.42997	0.978677	1.08254
	E1T7		39.8	39.4	40.8		3980	3940	4080		11380	11380	11380			0.349736	0.346221	0.358524		E2T8	1071.75	1092.35	1129.33	1097.81	1062.14	1087.14	1147.46		68.2845	69.7436	72.8571		993.853	1017.4	1074.6		915.339	937.022	989.707		77.5205	79.3569	83.8188		0.993853	1.0174	1.0746
	E1T8		44.6	43.8	42.8		4460	4380	4280		11180	11180	11180			0.398927	0.391771	0.382826		E2T9	917.051	948.659	982.913	949.541	877.821	704.884	796.748		57.4359	52.9134	56.9492		820.385	651.971	739.799		755.575	600.465	681.355		63.99	50.8537	57.7043		0.820385	0.651971	0.739799
	E1T9		39.5	36.8	34.5		3950	3680	3450		10760	10760	10760			0.3671	0.342007	0.320632
	E2T1		20.1	22.6	26.5		2010	2260	2650		11000	11000	11000			0.182727	0.205455	0.240909
	E2T2		39.8	35.1	39.5		3980	3510	3950		10650	10650	10650			0.373709	0.329577	0.370892																							water applied
	E2T3		48.95	49.5	44.5		4895	4950	4450		10180	10180	10180			0.480845	0.486248	0.437132															146.226	164.195	179.731						(mm)
	E2T4		38.4	37.8	35.4		3840	3780	3540		9990	9990	9990			0.384384	0.378378	0.354354															93.9637	95.9524	100.193					1263	1263	1263
	E2T5		37.5	47.5	43.5		3750	4750	4350		9680	9680	9680			0.387397	0.490702	0.44938															95.6298	88.1517	85.5172					1212	1212	1212
	E2T6		47.5	53.5	47.8		4750	5350	4780		8560	8560	8560			0.554907	0.625	0.558411															85.597	87.1139	88.4576					1205	1205	1205
	E2T7		40.5	35.8	41.6		4050	3580	4160		9280	9280	9280			0.436422	0.385776	0.448276															89.1781	91.1765	93.5345					1188	1188	1188
	E2T8		41.5	42.6	45.3		4150	4260	4530		8840	8840	8840			0.469457	0.4819	0.512443															77.6782	79.5059	80.6444					1168	1168	1168
	E2T9		35.6	38.6	34.5		3560	3860	3450		8370	8370	8370			0.425329	0.461171	0.412186															77.8384	74.895	80.1124					1084	1084	1084
																																	75.9053	77.5652	80.5459					1138	1138	1138
				grain yield t/ha								m3					TWU_V				Blue water foot print				Green water foot print				Grey water foot print				63.4363	65.9839	68.7448					1118	1118	1118
		E1T1	2.65	2.18	2.356					E1T1	126300	126300	126300			4766.04	5793.58	5360.78		4461.96	5423.95	5018.76		300.26	364.995	337.729		3.81283	4.63486	4.28862			213.887	363.333	250.796					1076	1076	1076
		E1T2	3.956	4.36	4.45					E1T2	121200	121200	121200			3000	3053.98	3228.26		2808.6	2859.14	3022.3		189	192.401	203.38		2.4	2.44319	2.58261			139.891	143.398	129.347					1100	1100	1100
		E1T3	4.95	4.86	4.65					E1T3	120500	120500	120500			3063.7	2779.82	2723.6		2868.24	2602.46	2549.83		193.013	175.128	171.587		2.45096	2.22385	2.17888			143.169	151.429	145.82					1065	1065	1065
		E1T4	3.96	3.89	3.68					E1T4	118800	118800	118800			2859.3	2888.32	2789.22		2676.87	2704.05	2611.26		180.136	181.964	175.721		2.28744	2.31066	2.23137			126.227	126.561	130					1018	1018	1018
		E1T5	4.65	4.89	4.56					E1T5	116800	116800	116800			2724.05	2923.91	3118.84		2550.26	2737.37	2919.86		171.615	184.207	196.487		2.17924	2.33913	2.49507			123.575	114.372	122.17					999	999	999
		E1T6	5.26	5.08	4.89					E1T6	108400	108400	108400			2506.73	2552.51	2612.15		2346.8	2389.66	2445.49		157.924	160.808	164.565		2.00538	2.04201	2.08972			111.883	109.474	105.926					968	968	968
		E1T7	3.98	3.94	4.08					E1T7	113800	113800	113800			2511.83	2388.55	2561.4		2351.57	2236.16	2397.99		158.245	150.479	161.368		2.00946	1.91084	2.04912			136.767	109.474	117.459					856	856	856
		E1T8	4.46	4.38	4.28					E1T8	111800	111800	111800			2434.34	2479.42	2591.4		2279.03	2321.24	2426.07		153.364	156.204	163.258		1.94747	1.98354	2.07312			110.962	113.333	118.393					928	928	928
		E1T9	3.95	3.68	3.45					E1T9	107600	107600	107600			2060.84	2133.86	2216.77		1929.36	1997.72	2075.34		129.833	134.433	139.656		1.64867	1.70709	1.77342			93.3333	85.9843	92.5424					884	884	884
		E2T1	2.01	2.26	2.65					E2T1	110000	110000	110000			5472.64	4867.26	4150.94		5123.48	4556.73	3886.11		344.776	306.637	261.509		4.37811	3.89381	3.32075										837	837	837
		E2T2	3.98	3.51	3.95					E2T2	106500	106500	106500			2601.56	2642.86	2822.03		2435.58	2474.24	2641.99		163.898	166.5	177.788		2.08125	2.11429	2.25763
		E2T3	4.895	4.95	4.45					E2T3	101800	101800	101800			2675.88	3034.19	2696.2		2505.16	2840.61	2524.18		168.58	191.154	169.861		2.1407	2.42735	2.15696
		E2T4	3.84	3.78	3.54					E2T4	99900	99900	99900			2291.36	2592.18	2230.77		2145.17	2426.8	2088.45		144.356	163.307	140.538		1.83309	2.07374	1.78462
		E2T5	3.75	4.75	4.35					E2T5	96800	96800	96800			2351.12	2168.39	2426.09		2201.12	2030.05	2271.3		148.121	136.609	152.843		1.8809	1.73472	1.94087
		E2T6	4.75	5.35	4.78					E2T6	85600	85600	85600			2130.12	2075.12	1951.43		1994.22	1942.72	1826.93		134.198	130.732	122.94		1.7041	1.66009	1.56115
		E2T7	4.05	3.58	4.16					E2T7	92800	92800	92800			2581.33	2037.89	2225.29		2416.64	1907.88	2083.31		162.624	128.387	140.193		2.06507	1.63032	1.78023
		E2T8	4.15	4.26	4.53					E2T8	88400	88400	88400			2079.67	2056.57	2287.64		1946.99	1925.36	2141.69		131.019	129.564	144.121		1.66374	1.64525	1.83011
		E2T9	3.56	3.86	3.45					E2T9	83700	83700	83700			1802.11	1600	1790.79		1687.13	1497.92	1676.54		113.533	100.8	112.82		1.44168	1.28	1.43264
																						PERCOLATION				WF+E				E				Total WF				Blue water foot print				Green water foot print				Grey water foot print
																				E1T1	1561	1560	1650		3205.04	4233.58	3710.78		195.408	237.537	219.792		3009.63	3996.04	3490.99		2801.97	3720.31	3250.11		204.655	271.731	237.387		3.00963	3.99604	3.49099
																				E1T2	1200	1210	1190		1800	1843.98	2038.26		123	125.213	132.359		1677	1718.77	1905.9		1561.29	1600.18	1774.39		114.036	116.876	129.601		1.677	1.71877	1.9059
																				E1T3	1101	1110	1070		1962.7	1669.82	1653.6		125.612	113.972	111.667		1837.09	1555.84	1541.93		1710.33	1448.49	1435.54		124.922	105.797	104.851		1.83709	1.55584	1.54193
																				E1T4	1084	1070	1070		1775.3	1818.32	1719.22		117.231	118.421	114.358		1658.07	1699.9	1604.86		1543.66	1582.61	1494.12		112.748	115.593	109.13		1.65807	1.6999	1.60486
																				E1T5	1002	1001	1020		1722.05	1922.91	2098.84		111.686	119.88	127.872		1610.36	1803.03	1970.97		1499.25	1678.62	1834.97		109.505	122.606	134.026		1.61036	1.80303	1.97097
																				E1T6	941	941	945		1565.73	1611.51	1667.15		102.776	104.653	107.098		1462.95	1506.86	1560.05		1362.01	1402.89	1452.41		99.4806	102.466	106.083		1.46295	1.50686	1.56005
																				E1T7	1140	946	960		1371.83	1442.55	1601.4		102.985	97.9305	105.018		1268.84	1344.62	1496.39		1181.29	1251.84	1393.14		86.2813	91.434	101.754		1.26884	1.34462	1.49639
																				E1T8	960	968	974		1474.34	1511.42	1617.4		99.8081	101.656	106.247		1374.54	1409.77	1511.15		1279.69	1312.49	1406.88		93.4684	95.8642	102.758		1.37454	1.40977	1.51115
																				E1T9	836	776	814		1224.84	1357.86	1402.77		84.4943	87.4882	90.8875		1140.34	1270.37	1311.88		1061.66	1182.71	1221.36		77.5433	86.3852	89.2079		1.14034	1.27037	1.31188
																				E2T1	1340	1353	1358		4132.64	3514.26	2792.94		224.378	199.558	170.189		3908.26	3314.7	2622.75		3599.51	3052.84	2415.56		304.844	258.547	204.575		3.90826	3.3147	2.62275
																				E2T2	1274	1260	1359		1327.56	1382.86	1463.03		83.25	84.5714	90.3051		1244.31	1298.29	1372.73		1146.01	1195.72	1264.28		97.0564	101.266	107.073		1.24431	1.29829	1.37273
																				E2T3	1160	1260	1170		1515.88	1774.19	1526.2		85.6281	97.094	86.2785		1430.25	1677.09	1439.92		1317.26	1544.6	1326.17		111.56	130.813	112.314		1.43025	1.67709	1.43992
																				E2T4	1160	1170	1160		1131.36	1422.18	1070.77		73.3235	82.9497	71.3846		1058.03	1339.23	999.385		974.45	1233.43	920.433		82.5267	104.46	77.952		1.05803	1.33923	0.999385
																				E2T5	1206	1242	1260		1145.12	926.394	1166.09		75.236	69.3886	77.6348		1069.89	857.005	1088.45		985.367	789.302	1002.46		83.4512	66.8464	84.8993		1.06989	0.857005	1.08845
																				E2T6	1074	1080	1075		1056.12	995.117	876.435		68.1639	66.4038	62.4459		987.957	928.714	813.989		909.908	855.345	749.684		77.0606	72.4397	63.4911		0.987957	0.928714	0.813989
																				E2T7	1104	1040	1065		1477.33	997.895	1160.29		82.6027	65.2126	71.2092		1394.73	932.682	1089.08		1284.55	859	1003.04		108.789	72.7492	84.9481		1.39473	0.932682	1.08908
																				E2T8	1052	1074	1096		1027.67	982.566	1191.64		66.5495	65.8101	73.2045		961.124	916.756	1118.44		885.195	844.332	1030.08		74.9676	71.5069	87.238		0.961124	0.916756	1.11844
																				E2T9	937	909	901		865.105	691	889.795		57.6674	51.2	57.3054		807.438	639.8	832.49		743.65	589.256	766.723		62.9802	49.9044	64.9342		0.807438	0.6398	0.83249
																												IRRI													WP-E
								GRAIN YIELD				water applied																Water productivity													Water productivity
								kg/ha				(mm)																				E
							2650	2180	2356		12630	12630	12630							369.8		12260.2	12260.2	12260.2			0.216147	0.177811	0.192167		195.408	237.537	219.792		12434.6	12392.5	12410.2			0.213115	0.175913	0.189844
							3956	4360	4450		12120	12120	12120							369.8		11750.2	11750.2	11750.2			0.336675	0.371058	0.378717		125.612	113.972	111.667		11994.4	12006	12008.3			0.329821	0.363151	0.370576
							4950	4860	4650		12050	12050	12050							369.8		11680.2	11680.2	11680.2			0.423794	0.416089	0.39811		99.8081	101.656	106.247		11950.2	11948.3	11943.8			0.414219	0.406751	0.389325
							3960	3890	3680		11880	11880	11880							369.8		11510.2	11510.2	11510.2			0.344043	0.337961	0.319716		123	125.213	132.359		11757	11754.8	11747.6			0.336821	0.330929	0.313254
							4650	4890	4560		11680	11680	11680							369.8		11310.2	11310.2	11310.2			0.411133	0.432353	0.403176		102.985	97.9305	105.018		11577	11582.1	11575			0.401658	0.422204	0.393953
							5260	5080	4890		10840	10840	10840							369.8		10470.2	10470.2	10470.2			0.502378	0.485187	0.46704		84.4943	87.4882	90.8875		10755.5	10752.5	10749.1			0.489052	0.472448	0.454921
							3980	3940	4080		11380	11380	11380							369.8		11010.2	11010.2	11010.2			0.361483	0.35785	0.370565		117.231	118.421	114.358		11262.8	11261.6	11265.6			0.353377	0.349862	0.362163
							4460	4380	4280		11180	11180	11180							369.8		10810.2	10810.2	10810.2			0.412573	0.405173	0.395922		102.776	104.653	107.098		11077.2	11075.3	11072.9			0.402628	0.395473	0.386529
							3950	3680	3450		10760	10760	10760							369.8		10390.2	10390.2	10390.2			0.380166	0.35418	0.332044		111.686	119.88	127.872		10648.3	10640.1	10632.1			0.370951	0.345861	0.324488
							2010	2260	2650		11000	11000	11000							369.8		10630.2	10630.2	10630.2			0.189084	0.212602	0.24929		224.378	199.558	170.189		10775.6	10800.4	10829.8			0.186532	0.209251	0.244695
							3980	3510	3950		10650	10650	10650							369.8		10280.2	10280.2	10280.2			0.387152	0.341433	0.384234		85.6281	97.094	86.2785		10564.4	10552.9	10563.7			0.376738	0.33261	0.373921
							4895	4950	4450		10180	10180	10180							369.8		9810.2	9810.2	9810.2			0.49897	0.504577	0.45361		66.5495	65.8101	73.2045		10113.5	10114.2	10106.8			0.484009	0.489411	0.440298
							3840	3780	3540		9990	9990	9990							369.8		9620.2	9620.2	9620.2			0.39916	0.392923	0.367976		83.25	84.5714	90.3051		9906.75	9905.43	9899.69			0.387615	0.381609	0.357587
							3750	4750	4350		9680	9680	9680							369.8		9310.2	9310.2	9310.2			0.402784	0.510193	0.467229		82.6027	65.2126	71.2092		9597.4	9614.79	9608.79			0.390731	0.494031	0.45271
							4750	5350	4780		8560	8560	8560							369.8		8190.2	8190.2	8190.2			0.579961	0.65322	0.583624		57.6674	51.2	57.3054		8502.33	8508.8	8502.69			0.55867	0.628761	0.562175
							4050	3580	4160		9280	9280	9280							369.8		8910.2	8910.2	8910.2			0.454535	0.401787	0.466881		73.3235	82.9497	71.3846		9206.68	9197.05	9208.62			0.439898	0.389255	0.451751
							4150	4260	4530		8840	8840	8840							369.8		8470.2	8470.2	8470.2			0.489953	0.50294	0.534816		68.1639	66.4038	62.4459		8771.84	8773.6	8777.55			0.473105	0.485548	0.516089
							3560	3860	3450		8370	8370	8370							369.8		8000.2	8000.2	8000.2			0.444989	0.482488	0.431239		75.236	69.3886	77.6348		8294.76	8300.61	8292.37			0.429186	0.465026	0.416045

## Sheet: BD
		2019
		BD
		0-5 cm
Main factors	2
Sub factors	9	Total factors	18
Replications	3
Treatments	R1	R2	R3	Total	Mean									Factors Mean				2019
E1T1	1.25	1.43	1.45	4.13	1.37667				ANOVA					1	1.61148	1		2957.07
E1T2	1.45	1.78	1.74	4.97	1.65667		df	SS	MSS	Cal F	Table F	Result		2	1.44889	2		2658.71
E1T3	1.72	1.64	1.69	5.05	1.68333	Replication	2	0.10907	0.0545352	3.52959	3.2759	S		SE.m	0.0239218
E1T4	1.51	1.63	1.55	4.69	1.56333	Treatment	17	0.985898	0.057994	3.75345	1.93321	S	Factor A	CD	0.068752
E1T5	1.7	1.44	1.75	4.89	1.63	Factor A	1	0.356891	0.356891	23.0984	4.13002	S		1	1.33333	9	9	2446.67
E1T6	1.81	1.7	1.9	5.41	1.80333	Factor B	8	573.781	71.7226	4641.98	2.22534	S		2	1.615	2	5	2963.52
E1T7	1.59	1.62	1.64	4.85	1.61667	A*B	8	-573.152	-71.644	-4636.89	2.22534	NS		3	1.59	3	2	2917.65
E1T8	1.58	1.67	1.68	4.93	1.64333	Error	34	0.52533	0.0154509					4	1.46833	7	7	2694.39
E1T9	1.55	1.32	1.72	4.59	1.53	Total	53	1.6203		t34=	2.03224			5	1.58833	4	3	2914.59
E2T1	1.23	1.3	1.34	3.87	1.29	SE.m	0.0717655							6	1.705	1	1	3128.68
E2T2	1.39	1.46	1.87	4.72	1.57333	CD	0.206256							7	1.495	6	6	2743.32
E2T3	1.48	1.69	1.32	4.49	1.49667	CV	8.1233							8	1.54	5	4	2825.9
E2T4	1.23	1.56	1.33	4.12	1.37333									9	1.43667	8	8	2636.28
E2T5	1.49	1.52	1.63	4.64	1.54667		Difference							SE.m	0.0507459
E2T6	1.64	1.61	1.57	4.82	1.60667	1	0.0866667	1.28	1.46	1.48			Factor B	CD	0.145845
E2T7	1.26	1.49	1.37	4.12	1.37333	2	0.0833333	1.48	1.81	1.77
E2T8	1.46	1.3	1.55	4.31	1.43667	3	0.186667	1.75	1.67	1.72
E2T9	1.28	1.26	1.49	4.03	1.34333	4	0.19	1.54	1.66	1.58
Total	26.62	27.42	28.59	82.63	1.53019	5	0.0833333	1.73	1.47	1.78
Mean	1.47889	1.52333	1.58833			6	0.196667	1.84	1.73	1.93
CF	126.439					7	0.243333	1.62	1.65	1.67
TSSQ	1.6203	RSSQ	0.10907			8	0.206667	1.61	1.7	1.71
tSSQ	0.985898	ESSQ	0.52533			9	0.186667	1.58	1.35	1.75
								1.21	1.28	1.32
								1.37	1.44	1.85
								1.46	1.67	1.3
		5-10 cm						1.21	1.54	1.31
								1.47	1.5	1.61
Main factors	2																		1.51	1.48	1.45
Sub factors	9	Total factors	18																1.75	1.78	1.74
Replications	3																		1.78	1.78	1.79
Treatments	R1	R2	R3	Total	Mean									Factors Mean					1.66	1.68	1.65
E1T1	1.34	1.41	1.48	4.23	1.41				ANOVA					1	1.64185	#N/A			1.7	1.74	1.75
E1T2	1.58	1.71	1.77	5.06	1.68667		df	SS	MSS	Cal F	Table F	Result		2	1.49889	#N/A			1.91	1.85	1.95
E1T3	1.75	1.67	1.72	5.14	1.71333	Replication	2	0.0218815	0.0109407	0.708099	3.2759	NS		SE.m	0.0158304				1.69	1.72	1.74
E1T4	1.59	1.61	1.58	4.78	1.59333	Treatment	17	0.900259	0.0529564	3.42741	1.93321	S	Factor A	CD	0.045497				1.78	1.67	1.78
E1T5	1.73	1.67	1.58	4.98	1.66	Factor A	1	0.275919	0.275919	17.8578	4.13002	S		1	1.375	#N/A	9		1.65	1.62	1.62
E1T6	1.84	1.78	1.88	5.5	1.83333	Factor B	8	603.902	75.4878	4885.67	2.22534	S		2	1.655	#N/A	5		1.37	1.39	1.38
E1T7	1.62	1.65	1.67	4.94	1.64667	A*B	8	-603.278	-75.4098	-4880.62	2.22534	NS		3	1.63	#N/A	2		1.68	1.6	1.7
E1T8	1.71	1.6	1.71	5.02	1.67333	Error	34	0.230052	0.00676623					4	1.50833	#N/A	7		1.57	1.68	1.51
E1T9	1.58	1.55	1.55	4.68	1.56	Total	53	1.15219		t34=	2.03224			5	1.62833	#N/A	3		1.47	1.5	1.42
E2T1	1.33	1.35	1.34	4.02	1.34	SE.m	0.0474912							6	1.745	#N/A	1		1.58	1.61	1.72
E2T2	1.44	1.51	1.92	4.87	1.62333	CD	0.136491							7	1.535	#N/A	6		1.73	1.7	1.66
E2T3	1.53	1.64	1.47	4.64	1.54667	CV	5.23807							8	1.58	#N/A	4		1.45	1.48	1.46
E2T4	1.38	1.51	1.38	4.27	1.42333									9	1.47667	#N/A	8		1.55	1.5	1.53
E2T5	1.54	1.57	1.68	4.79	1.59667		Difference							SE.m	0.0335813				1.37	1.45	1.48
E2T6	1.69	1.66	1.62	4.97	1.65667	1	0.07	1.39	1.46	1.53			Factor B	CD	0.0965136
E2T7	1.41	1.44	1.42	4.27	1.42333	2	0.0633333	1.63	1.76	1.82
E2T8	1.51	1.4	1.55	4.46	1.48667	3	0.166667	1.8	1.72	1.77
E2T9	1.33	1.41	1.44	4.18	1.39333	4	0.17	1.64	1.66	1.63
Total	27.9	28.14	28.76	84.8	1.57037	5	0.0633333	1.78	1.72	1.63
Mean	1.55	1.56333	1.59778			6	0.176667	1.89	1.83	1.93
CF	133.167					7	0.223333	1.67	1.7	1.72
TSSQ	1.15219	RSSQ	0.0218815			8	0.186667	1.76	1.65	1.76
tSSQ	0.900259	ESSQ	0.230052			9	0.166667	1.63	1.6	1.6
								1.38	1.4	1.39
								1.49	1.56	1.97
								1.58	1.69	1.52
		10-15 cm						1.43	1.56	1.43
								1.59	1.62	1.73
Main factors	2
Sub factors	9	Total factors	18
Replications	3
Treatments	R1	R2	R3	Total	Mean									Factors Mean				2019
E1T1	1.41	1.58	1.45	4.44	1.48				ANOVA					1	1.71185	#N/A		3141.25
E1T2	1.75	1.78	1.74	5.27	1.75667		df	SS	MSS	Cal F	Table F	Result		2	1.53852	#N/A		2823.18
E1T3	1.78	1.78	1.79	5.35	1.78333	Replication	2	0.00195926	0.00097963	0.0634029	3.2759	NS		SE.m	0.00916488
E1T4	1.66	1.68	1.65	4.99	1.66333	Treatment	17	1.02748	0.0604401	3.91176	1.93321	S	Factor A	CD	0.0263401
E1T5	1.7	1.74	1.75	5.19	1.73	Factor A	1	0.4056	0.4056	26.2509	4.13002	S		1	1.43	#N/A	9	2624.05
E1T6	1.91	1.85	1.95	5.71	1.90333	Factor B	8	646.223	80.7779	5228.05	2.22534	S		2	1.70833	#N/A	5	3134.79
E1T7	1.69	1.72	1.74	5.15	1.71667	A*B	8	-645.601	-80.7001	-5223.01	2.22534	NS		3	1.685	#N/A	2	3091.97
E1T8	1.78	1.67	1.78	5.23	1.74333	Error	34	0.0771074	0.00226786					4	1.56333	#N/A	7	2868.72
E1T9	1.65	1.62	1.62	4.89	1.63	Total	53	1.10655		t34=	2.03224			5	1.68333	#N/A	3	3088.92
E2T1	1.37	1.39	1.38	4.14	1.38	SE.m	0.0274946							6	1.8	#N/A	1	3303
E2T2	1.68	1.6	1.7	4.98	1.66	CD	0.0790203							7	1.59	#N/A	6	2917.65
E2T3	1.57	1.68	1.51	4.76	1.58667	CV	2.93026							8	1.635	#N/A	4	3000.22
E2T4	1.47	1.5	1.42	4.39	1.46333									9	1.53167	#N/A	8	2810.61
E2T5	1.58	1.61	1.72	4.91	1.63667		Difference							SE.m	0.0194416
E2T6	1.73	1.7	1.66	5.09	1.69667	1	0.1	1.52	1.69	1.56			Factor B	CD	0.0558758
E2T7	1.45	1.48	1.46	4.39	1.46333	2	0.0966667	1.86	1.89	1.85
E2T8	1.55	1.5	1.53	4.58	1.52667	3	0.196667	1.89	1.89	1.9
E2T9	1.37	1.45	1.48	4.3	1.43333	4	0.2	1.77	1.79	1.76
Total	29.1	29.33	29.33	87.76	1.62519	5	0.0933333	1.81	1.85	1.86
Mean	1.61667	1.62944	1.62944			6	0.206667	2.02	1.96	2.06
CF	142.626					7	0.253333	1.8	1.83	1.85
TSSQ	1.10655	RSSQ	0.00195926			8	0.216667	1.89	1.78	1.89
tSSQ	1.02748	ESSQ	0.0771074			9	0.196667	1.76	1.73	1.73
							E2T3	1.48	1.5	1.49
							E2T4	1.79	1.71	1.81
							E2T5	1.68	1.79	1.62
		15-20cm					E2T6	1.58	1.61	1.53
							E2T7	1.69	1.72	1.83
Main factors	2						E2T8	1.84	1.81	1.77
Sub factors	9	Total factors	18				E2T9	1.56	1.59	1.57
Replications	3							1.66	1.61	1.64
Treatments	R1	R2	R3	Total	Mean			1.48	1.56	1.59				Factors Mean
E1T1	1.42	1.79	1.56	4.77	1.59				ANOVA					1	1.82185	1
E1T2	1.66	1.99	1.95	5.6	1.86667		df	SS	MSS	Cal F	Table F	Result		2	1.64852	2
E1T3	1.79	1.99	1.9	5.68	1.89333	Replication	2	0.101737	0.0508685	3.29228	3.2759	S		SE.m	0.0220252
E1T4	1.77	1.79	1.76	5.32	1.77333	Treatment	17	1.02748	0.0604401	3.91176	1.93321	S	Factor A	CD	0.063301
E1T5	1.91	1.65	1.96	5.52	1.84	Factor A	1	0.4056	0.4056	26.2509	4.13002	S		1	1.54	9	9
E1T6	2.02	1.96	2.06	6.04	2.01333	Factor B	8	735.554	91.9442	5950.75	2.22534	S		2	1.81833	2	5
E1T7	1.7	1.83	1.95	5.48	1.82667	A*B	8	-734.932	-91.8665	-5945.72	2.22534	NS		3	1.795	3	2
E1T8	1.89	1.78	1.89	5.56	1.85333	Error	34	0.44533	0.0130979					4	1.67333	7	7
E1T9	1.76	1.63	1.83	5.22	1.74	Total	53	1.57455		t34=	2.03224			5	1.79333	4	3
E2T1	1.48	1.4	1.59	4.47	1.49	SE.m	0.0660755							6	1.91	1	1
E2T2	1.79	1.61	1.91	5.31	1.77	CD	0.189903							7	1.7	6	6
E2T3	1.68	1.59	1.82	5.09	1.69667	CV	6.59562							8	1.745	5	4
E2T4	1.58	1.61	1.53	4.72	1.57333									9	1.64167	8	8
E2T5	1.49	1.92	1.83	5.24	1.74667									SE.m	0.0467225
E2T6	1.84	1.61	1.97	5.42	1.80667								Factor B	CD	0.134282
E2T7	1.56	1.59	1.57	4.72	1.57333
E2T8	1.66	1.61	1.64	4.91	1.63667
E2T9	1.48	1.56	1.59	4.63	1.54333
Total	30.48	30.91	32.31	93.7	1.73519
Mean	1.69333	1.71722	1.795
CF	162.587
TSSQ	1.57455	RSSQ	0.101737
tSSQ	1.02748	ESSQ	0.44533
		2019
		BD
		0-5 cm
Main factors	2
Sub factors	9	Total factors	18
Replications	3
Treatments	R1	R2	R3	Total	Mean									Factors Mean				2019
E1T1	1.32	1.35	1.37	4.04	1.34667				ANOVA					1	1.58148	#N/A		2902.02
E1T2	1.62	1.65	1.61	4.88	1.62667		df	SS	MSS	Cal F	Table F	Result		2	1.47852	#N/A		2713.08
E1T3	1.69	1.61	1.66	4.96	1.65333	Replication	2	0.00991111	0.00495556	0.32073	3.2759	NS		SE.m	0.0170359
E1T4	1.48	1.6	1.52	4.6	1.53333	Treatment	17	0.773667	0.0455098	2.94545	1.93321	S	Factor A	CD	0.0489615
E1T5	1.67	1.51	1.62	4.8	1.6	Factor A	1	0.143119	0.143119	9.26281	4.13002	S		1	1.33333	9	9	2446.67
E1T6	1.78	1.67	1.87	5.32	1.77333	Factor B	8	573.635	71.7044	4640.8	2.22534	S		2	1.615	#N/A	5	2963.53
E1T7	1.56	1.59	1.61	4.76	1.58667	A*B	8	-573.005	-71.6256	-4635.7	2.22534	NS		3	1.59	#N/A	2	2917.65
E1T8	1.55	1.64	1.65	4.84	1.61333	Error	34	0.266422	0.00783595					4	1.46667	#N/A	7	2691.33
E1T9	1.52	1.49	1.49	4.5	1.5	Total	53	1.05		t34=	2.03224			5	1.58833	#N/A	3	2914.59
E2T1	1.31	1.33	1.32	3.96	1.32	SE.m	0.0511076							6	1.705	1	1	3128.68
E2T2	1.42	1.49	1.9	4.81	1.60333	CD	0.146885							7	1.495	#N/A	6	2743.33
E2T3	1.51	1.72	1.35	4.58	1.52667	CV	5.78568							8	1.54	5	4	2825.9
E2T4	1.41	1.39	1.4	4.2	1.4									9	1.43667	#N/A	8	2636.28
E2T5	1.52	1.55	1.66	4.73	1.57667		Difference							SE.m	0.0361385
E2T6	1.67	1.64	1.6	4.91	1.63667	1	0.0266667	1.29	1.32	1.34			Factor B	CD	0.103863
E2T7	1.39	1.42	1.4	4.21	1.40333	2	0.0233333	1.59	1.62	1.58
E2T8	1.49	1.43	1.48	4.4	1.46667	3	0.126667	1.66	1.58	1.63
E2T9	1.41	1.34	1.37	4.12	1.37333	4	0.133333	1.45	1.57	1.49
Total	27.32	27.42	27.88	82.62	1.53	5	0.0233333	1.64	1.48	1.59
Mean	1.51778	1.52333	1.54889			6	0.136667	1.75	1.64	1.84
CF	126.409					7	0.183333	1.53	1.56	1.58
TSSQ	1.05	RSSQ	0.00991111			8	0.146667	1.52	1.61	1.62
tSSQ	0.773667	ESSQ	0.266422			9	0.126667	1.49	1.46	1.46
								1.34	1.36	1.35
								1.45	1.52	1.93
								1.54	1.75	1.38
		5-10 cm						1.44	1.42	1.43
								1.55	1.58	1.69
Main factors	2							1.7	1.67	1.63									1.51	1.48	1.45
Sub factors	9	Total factors	18					1.42	1.45	1.43									1.75	1.78	1.74
Replications	3							1.52	1.46	1.51									1.78	1.78	1.79
Treatments	R1	R2	R3	Total	Mean			1.44	1.37	1.4				Factors Mean					1.66	1.68	1.65
E1T1	1.31	1.38	1.45	4.14	1.38				ANOVA					1	1.61185	#N/A			1.7	1.74	1.75
E1T2	1.55	1.68	1.74	4.97	1.65667		df	SS	MSS	Cal F	Table F	Result		2	1.51889	#N/A			1.91	1.85	1.95
E1T3	1.72	1.64	1.69	5.05	1.68333	Replication	2	0.0665481	0.0332741	2.15354	3.2759	NS		SE.m	0.0213229				1.69	1.72	1.74
E1T4	1.56	1.58	1.55	4.69	1.56333	Treatment	17	0.741009	0.0435888	2.82112	1.93321	S	Factor A	CD	0.0612827				1.78	1.67	1.78
E1T5	1.7	1.64	1.55	4.89	1.63	Factor A	1	0.116669	0.116669	7.55093	4.13002	S		1	1.37	#N/A	9		1.65	1.62	1.62
E1T6	1.91	1.65	1.85	5.41	1.80333	Factor B	8	600.111	75.0139	4855	2.22534	S		2	1.65	#N/A	5		1.37	1.39	1.38
E1T7	1.59	1.62	1.64	4.85	1.61667	A*B	8	-599.487	-74.9359	-4849.95	2.22534	NS		3	1.625	#N/A	2		1.68	1.6	1.7
E1T8	1.68	1.57	1.68	4.93	1.64333	Error	34	0.417385	0.012276					4	1.50333	#N/A	7		1.57	1.68	1.51
E1T9	1.45	1.62	1.52	4.59	1.53	Total	53	1.22494		t34=	2.03224			5	1.62333	#N/A	3		1.47	1.5	1.42
E2T1	1.35	1.37	1.36	4.08	1.36	SE.m	0.0639688							6	1.74	#N/A	1		1.58	1.61	1.72
E2T2	1.36	1.63	1.94	4.93	1.64333	CD	0.183848							7	1.53	#N/A	6		1.73	1.7	1.66
E2T3	1.55	1.66	1.49	4.7	1.56667	CV	7.07802							8	1.575	#N/A	4		1.45	1.48	1.46
E2T4	1.4	1.33	1.6	4.33	1.44333									9	1.47167	#N/A	8		1.55	1.5	1.53
E2T5	1.56	1.39	1.9	4.85	1.61667		Difference							SE.m	0.0452328				1.37	1.45	1.48
E2T6	1.71	1.68	1.64	5.03	1.67667	1	0.02	1.33	1.4	1.47			Factor B	CD	0.13
E2T7	1.43	1.46	1.44	4.33	1.44333	2	0.0133333	1.57	1.7	1.76
E2T8	1.53	1.42	1.57	4.52	1.50667	3	0.116667	1.74	1.66	1.71
E2T9	1.35	1.43	1.46	4.24	1.41333	4	0.12	1.58	1.6	1.57
Total	27.71	27.75	29.07	84.53	1.56537	5	0.0133333	1.72	1.66	1.57
Mean	1.53944	1.54167	1.615			6	0.126667	1.93	1.67	1.87
CF	132.321					7	0.173333	1.61	1.64	1.66
TSSQ	1.22494	RSSQ	0.0665481			8	0.136667	1.7	1.59	1.7
tSSQ	0.741009	ESSQ	0.417385			9	0.116667	1.47	1.64	1.54
								1.33	1.35	1.34
								1.34	1.61	1.92
								1.53	1.64	1.47
		10-15 cm						1.38	1.31	1.58
								1.54	1.37	1.88
Main factors	2							1.69	1.66	1.62
Sub factors	9	Total factors	18					1.41	1.44	1.42
Replications	3							1.51	1.4	1.55
Treatments	R1	R2	R3	Total	Mean			1.33	1.41	1.44				Factors Mean				2019
E1T1	1.34	1.41	1.48	4.23	1.41				ANOVA					1	1.64185	#N/A		3012.8
E1T2	1.58	1.71	1.77	5.06	1.68667		df	SS	MSS	Cal F	Table F	Result		2	1.54222	#N/A		2829.98
E1T3	1.95	1.47	1.72	5.14	1.71333	Replication	2	0.208781	0.104391	6.7563	3.2759	S		SE.m	0.0264346
E1T4	1.59	1.61	1.58	4.78	1.59333	Treatment	17	0.743809	0.0437535	2.83178	1.93321	S	Factor A	CD	0.0759736
E1T5	1.73	1.67	1.58	4.98	1.66	Factor A	1	0.134002	0.134002	8.67277	4.13002	S		1	1.395	#N/A	9	2559.82
E1T6	1.84	1.78	1.88	5.5	1.83333	Factor B	8	620.543	77.5679	5020.29	2.22534	S		2	1.67333	#N/A	5	3070.57
E1T7	1.62	1.65	1.67	4.94	1.64667	A*B	8	-619.933	-77.4917	-5015.36	2.22534	NS		3	1.65	#N/A	2	3027.75
E1T8	1.71	1.4	1.91	5.02	1.67333	Error	34	0.641485	0.0188672					4	1.545	#N/A	7	2835.08
E1T9	1.58	1.25	1.85	4.68	1.56	Total	53	1.59408		t34=	2.03224			5	1.64833	#N/A	3	3024.69
E2T1	1.37	1.39	1.38	4.14	1.38	SE.m	0.0793037							6	1.765	#N/A	1	3238.77
E2T2	1.68	1.4	1.9	4.98	1.66	CD	0.227921							7	1.555	#N/A	6	2853.42
E2T3	1.57	1.68	1.51	4.76	1.58667	CV	8.62781							8	1.6	#N/A	4	2936
E2T4	1.47	1.3	1.72	4.49	1.49667									9	1.49667	#N/A	8	2746.38
E2T5	1.58	1.41	1.92	4.91	1.63667		Difference							SE.m	0.0560762
E2T6	1.73	1.7	1.66	5.09	1.69667	1	0.03	1.45	1.52	1.59			Factor B	CD	0.161164
E2T7	1.45	1.48	1.46	4.39	1.46333	2	0.0266667	1.69	1.82	1.88
E2T8	1.55	1.5	1.53	4.58	1.52667	3	0.126667	2.06	1.58	1.83
E2T9	1.37	1.45	1.48	4.3	1.43333	4	0.0966667	1.7	1.72	1.69
Total	28.71	27.26	30	85.97	1.59204	5	0.0233333	1.84	1.78	1.69
Mean	1.595	1.51444	1.66667			6	0.136667	1.95	1.89	1.99
CF	136.867					7	0.183333	1.73	1.76	1.78
TSSQ	1.59408	RSSQ	0.208781			8	0.146667	1.82	1.51	2.02
tSSQ	0.743809	ESSQ	0.641485			9	0.126667	1.69	1.36	1.96
							E2T3	1.48	1.5	1.49
							E2T4	1.79	1.51	2.01
							E2T5	1.68	1.79	1.62
		15-20cm					E2T6	1.58	1.41	1.83
							E2T7	1.69	1.52	2.03
Main factors	2						E2T8	1.84	1.81	1.77
Sub factors	9	Total factors	18				E2T9	1.56	1.59	1.57
Replications	3							1.66	1.61	1.64
Treatments	R1	R2	R3	Total	Mean			1.48	1.56	1.59				Factors Mean
E1T1	1.36	1.73	1.5	4.59	1.53				ANOVA					1	1.76185	#N/A
E1T2	1.6	1.93	1.89	5.42	1.80667		df	SS	MSS	Cal F	Table F	Result		2	1.69852	#N/A
E1T3	1.73	1.93	1.84	5.5	1.83333	Replication	2	0.101737	0.0508685	3.29228	3.2759	S		SE.m	0.0220252
E1T4	1.71	1.73	1.7	5.14	1.71333	Treatment	17	0.676031	0.0397666	2.57374	1.93321	S	Factor A	CD	0.063301
E1T5	1.85	1.59	1.9	5.34	1.78	Factor A	1	0.05415	0.05415	3.50466	4.13002	NS		1	1.535	#N/A	9
E1T6	1.96	1.9	2	5.86	1.95333	Factor B	8	731.367	91.4209	5916.88	2.22534	S		2	1.81333	#N/A	5
E1T7	1.64	1.77	1.89	5.3	1.76667	A*B	8	-730.745	-91.3432	-5911.85	2.22534	NS		3	1.79	#N/A	2
E1T8	1.83	1.72	1.83	5.38	1.79333	Error	34	0.44533	0.0130979					4	1.66833	#N/A	7
E1T9	1.7	1.57	1.77	5.04	1.68	Total	53	1.2231		t34=	2.03224			5	1.78833	#N/A	3
E2T1	1.53	1.45	1.64	4.62	1.54	SE.m	0.0660755							6	1.905	#N/A	1
E2T2	1.84	1.66	1.96	5.46	1.82	CD	0.189903							7	1.695	#N/A	6
E2T3	1.73	1.64	1.87	5.24	1.74667	CV	6.61468							8	1.74	#N/A	4
E2T4	1.63	1.66	1.58	4.87	1.62333		E1T1	1.3	1.67	1.44				9	1.63667	#N/A	8
E2T5	1.54	1.97	1.88	5.39	1.79667		E1T2	1.54	1.87	1.83				SE.m	0.0467225
E2T6	1.89	1.66	2.02	5.57	1.85667		E1T3	1.67	1.87	1.78			Factor B	CD	0.134282
E2T7	1.61	1.64	1.62	4.87	1.62333		E1T4	1.65	1.67	1.64
E2T8	1.71	1.66	1.69	5.06	1.68667		E1T5	1.79	1.53	1.84
E2T9	1.53	1.61	1.64	4.78	1.59333		E1T6	1.9	1.84	1.94
Total	30.39	30.82	32.22	93.43	1.73019		E1T7	1.58	1.71	1.83
Mean	1.68833	1.71222	1.79				E1T8	1.77	1.66	1.77
CF	161.651						E1T9	1.64	1.51	1.71
TSSQ	1.2231	RSSQ	0.101737				E2T1	1.54	1.46	1.65
tSSQ	0.676031	ESSQ	0.44533				E2T2	1.85	1.67	1.97
							E2T3	1.74	1.65	1.88
							E2T4	1.64	1.67	1.59
							E2T5	1.55	1.98	1.89
							E2T6	1.9	1.67	2.03
							E2T7	1.62	1.65	1.63
							E2T8	1.72	1.67	1.7
							E2T9	1.54	1.62	1.65
		2019
		Infiltartion rate						30.37	30.8	32.2
								1.66833	1.69222	1.77
Main factors	2							161.631	-0.02	-0.02
Sub factors	9	Total factors	18					1.2031	#VALUE!	0.081737
Replications	3							0.656031	#VALUE!	0.42533
Treatments	R1	R2	R3	Total	Mean			-0.02	-0.02	-0.02				Factors Mean				2019
E1T1	0.14	0.51	0.1	0.75	0.25				ANOVA					1	0.212593	#N/A		390.107
E1T2	0.21	0.25	0.26	0.72	0.24		df	SS	MSS	Cal F	Table F	Result		2	0.287037	#N/A		526.713
E1T3	0.19	0.27	0.23	0.69	0.23	Replication	2	0.0582259	0.029113	1.88423	3.2759	NS		SE.m	0.0244676
E1T4	0.25	0.13	0.15	0.53	0.176667	Treatment	17	0.122698	0.00721754	0.467128	1.93321	NS	Factor A	CD	0.0703206
E1T5	0.2	0.18	0.23	0.61	0.203333	Factor A	1	0.0748167	0.0748167	4.84223	4.13002	S		1	0.28	#N/A	9	513.8
E1T6	0.25	0.1	0.36	0.71	0.236667	Factor B	8	15.9089	1.98861	128.706	2.22534	S		2	0.28	#N/A	5	513.8
E1T7	0.2	0.18	0.22	0.6	0.2	A*B	8	-15.861	-1.98263	-128.318	2.22534	NS		3	0.253333	#N/A	2	464.867
E1T8	0.2	0.25	0.2	0.65	0.216667	Error	34	0.549574	0.0161639					4	0.216667	#N/A	7	397.583
E1T9	0.15	0.16	0.17	0.48	0.16	Total	53	0.730498		t34=	2.03224			5	0.243333	#N/A	3	446.517
E2T1	0.1	0.47	0.36	0.93	0.31	SE.m	0.0734029							6	0.29	#N/A	1	532.15
E2T2	0.29	0.13	0.54	0.96	0.32	CD	0.210962							7	0.245	#N/A	6	449.575
E2T3	0.27	0.15	0.41	0.83	0.276667	CV	50.8927							8	0.24	#N/A	4	440.4
E2T4	0.53	0.11	0.13	0.77	0.256667									9	0.2	#N/A	8	367
E2T5	0.28	0.26	0.31	0.85	0.283333		Difference							SE.m	0.0519037
E2T6	0.33	0.14	0.56	1.03	0.343333	1	-0.06	0.11	0.48	0.07			Factor B	CD	0.149173
E2T7	0.31	0.16	0.4	0.87	0.29	2	-0.08	0.18	0.22	0.23
E2T8	0.28	0.13	0.38	0.79	0.263333	3	-0.0466667	0.16	0.24	0.2
E2T9	0.23	0.24	0.25	0.72	0.24	4	-0.08	0.22	0.1	0.12
Total	4.41	3.82	5.26	13.49	0.249815	5	-0.08	0.17	0.15	0.2
Mean	0.245	0.212222	0.292222			6	-0.106667	0.22	0.07	0.33
CF	3.37					7	-0.09	0.17	0.15	0.19
TSSQ	0.730498	RSSQ	0.0582259			8	-0.0466667	0.17	0.22	0.17
tSSQ	0.122698	ESSQ	0.549574			9	-0.08	0.12	0.13	0.14
							E2T3	0.15	0.52	0.41
							E2T4	0.34	0.18	0.59
							E2T5	0.32	0.2	0.46
		2019					E2T6	0.58	0.16	0.18
		Infiltartion rate					E2T7	0.33	0.31	0.36
Main factors	2						E2T8	0.38	0.19	0.61
Sub factors	9	Total factors	18				E2T9	0.36	0.21	0.45
Replications	3							0.33	0.18	0.43
Treatments	R1	R2	R3	Total	Mean			0.28	0.29	0.3				Factors Mean
E1T1	0.11	0.48	0.07	0.66	0.22				ANOVA					1	0.182963	#N/A
E1T2	0.18	0.22	0.23	0.63	0.21		df	SS	MSS	Cal F	Table F	Result		2	0.337407	#N/A
E1T3	0.16	0.24	0.2	0.6	0.2	Replication	2	0.15667	0.0783352	5.06995	3.2759	S		SE.m	0.0296285
E1T4	0.22	0.1	0.12	0.44	0.146667	Treatment	17	0.369965	0.0217626	1.40851	1.93321	NS	Factor A	CD	0.0851531
E1T5	0.17	0.15	0.2	0.52	0.173333	Factor A	1	0.322017	0.322017	20.8413	4.13002	S		1	0.29	#N/A	9
E1T6	0.22	0.07	0.33	0.62	0.206667	Factor B	8	17.2121	2.15151	139.249	2.22534	S		2	0.29	#N/A	5
E1T7	0.17	0.15	0.19	0.51	0.17	A*B	8	-17.1642	-2.14552	-138.861	2.22534	NS		3	0.263333	#N/A	2
E1T8	0.11	0.29	0.17	0.57	0.19	Error	34	0.805863	0.0237019					4	0.226667	#N/A	7
E1T9	0.12	0.13	0.14	0.39	0.13	Total	53	1.3325		t34=	2.03224			5	0.255	#N/A	3
E2T1	0.15	0.52	0.41	1.08	0.36	SE.m	0.0888854							6	0.3	#N/A	1
E2T2	0.34	0.18	0.59	1.11	0.37	CD	0.255459							7	0.255	#N/A	6
E2T3	0.32	0.1	0.56	0.98	0.326667	CV	59.171							8	0.251667	#N/A	4
E2T4	0.58	0.16	0.18	0.92	0.306667		E1T1	0.05	0.42	0.01				9	0.21	#N/A	8
E2T5	0.33	0.12	0.56	1.01	0.336667		E1T2	0.12	0.16	0.17				SE.m	0.0628515
E2T6	0.38	0.09	0.71	1.18	0.393333		E1T3	0.1	0.18	0.14			Factor B	CD	0.180637
E2T7	0.36	0.11	0.55	1.02	0.34		E1T4	0.16	0.04	0.06
E2T8	0.33	0.18	0.43	0.94	0.313333		E1T5	0.11	0.09	0.14
E2T9	0.28	0.29	0.3	0.87	0.29		E1T6	0.16	0.01	0.27
Total	4.53	3.58	5.94	14.05	0.260185		E1T7	0.11	0.09	0.13
Mean	0.251667	0.198889	0.33				E1T8	0.05	0.23	0.11
CF	3.6556						E1T9	0.06	0.07	0.08
TSSQ	1.3325	RSSQ	0.15667				E2T1	0.16	0.53	0.42
tSSQ	0.369965	ESSQ	0.805863				E2T2	0.35	0.19	0.6

## Sheet: Physical properties
		2019
		BD
		0-5 cm
Main factors	2
Sub factors	9	Total factors	18
Replications	3
Treatments	R1	R2	R3	Total	Mean									Factors Mean				2019
E1T1	1.33	1.36	1.38	4.07	1.35667				ANOVA					1	1.58407	1		2906.78
E1T2	1.63	1.66	1.62	4.91	1.63667		df	SS	MSS	Cal F	Table F	Result		2	1.51852	2		2786.48
E1T3	1.68	1.62	1.67	4.97	1.65667	Replication	2	0.0367259	0.018363	1.9353	3.2759	NS		SE.m	0.0187463
E1T4	1.43	1.61	1.53	4.57	1.52333	Treatment	17	0.646076	0.0380045	4.00534	1.93321	S	Factor A	CD	0.0538774
E1T5	1.68	1.32	1.83	4.83	1.61	Factor A	1	0.0580167	0.0580167	6.11445	4.13002	S		1	1.35833	9	9	2492.54
E1T6	1.67	1.68	1.88	5.23	1.74333	Factor B	8	588.954	73.6192	7758.82	2.22534	S		2	1.63833	2	5	3006.34
E1T7	1.57	1.6	1.62	4.79	1.59667	A*B	8	-588.365	-73.5457	-7751.07	2.22534	NS		3	1.61167	4	2	2957.41
E1T8	1.36	1.65	1.86	4.87	1.62333	Error	34	0.322607	0.00948845					4	1.48333	7	7	2721.92
E1T9	1.53	1.5	1.5	4.53	1.51	Total	53	1.00541		t34=	2.03224			5	1.61333	3	3	2960.47
E2T1	1.35	1.37	1.36	4.08	1.36	SE.m	0.0562389							6	1.71	1	1	3137.85
E2T2	1.66	1.58	1.68	4.92	1.64	CD	0.161632							7	1.52	6	6	2789.2
E2T3	1.55	1.66	1.49	4.7	1.56667	CV	6.27918							8	1.565	5	4	2871.78
E2T4	1.45	1.48	1.4	4.33	1.44333									9	1.46167	8	8	2682.16
E2T5	1.56	1.59	1.7	4.85	1.61667		Difference							SE.m	0.0397669
E2T6	1.71	1.68	1.64	5.03	1.67667	1	-0.00333333	1.34	1.37	1.39			Factor B	CD	0.114291
E2T7	1.43	1.46	1.44	4.33	1.44333	2	-0.00333333	1.64	1.67	1.63
E2T8	1.53	1.48	1.51	4.52	1.50667	3	0.09	1.69	1.63	1.68
E2T9	1.35	1.43	1.46	4.24	1.41333	4	0.08	1.44	1.62	1.54
Total	27.47	27.73	28.57	83.77	1.5513	5	-0.00666667	1.69	1.33	1.84
Mean	1.52611	1.54056	1.58722			6	0.0666667	1.68	1.69	1.89
CF	129.952					7	0.153333	1.58	1.61	1.63
TSSQ	1.00541	RSSQ	0.0367259			8	0.116667	1.37	1.66	1.87
tSSQ	0.646076	ESSQ	0.322607			9	0.0966667	1.54	1.51	1.51
								1.33	1.35	1.34
								1.64	1.56	1.66
								1.53	1.64	1.47
		5-15 cm						1.43	1.46	1.38
								1.54	1.57	1.68
Main factors	2							1.69	1.66	1.62									1.51	1.48	1.45
Sub factors	9	Total factors	18					1.41	1.44	1.42									1.75	1.78	1.74
Replications	3							1.51	1.46	1.49									1.78	1.78	1.79
Treatments	R1	R2	R3	Total	Mean			1.33	1.41	1.44				Factors Mean					1.66	1.68	1.65
E1T1	3.34	3.41	3.48	10.23	3.41				ANOVA					1	3.64185	#N/A			1.7	1.74	1.75
E1T2	3.58	3.71	3.77	11.06	3.68667		df	SS	MSS	Cal F	Table F	Result		2	3.19889	#N/A			1.91	1.85	1.95
E1T3	3.75	3.67	3.72	11.14	3.71333	Replication	2	0.148104	0.0740519	7.80442	3.2759	S		SE.m	0.0300658				1.69	1.72	1.74
E1T4	3.59	3.61	3.58	10.78	3.59333	Treatment	17	3.27326	0.192545	20.2925	1.93321	S	Factor A	CD	0.08641				1.78	1.67	1.78
E1T5	3.73	3.37	3.88	10.98	3.66	Factor A	1	2.64892	2.64892	279.173	4.13002	S		1	3.225	#N/A	9		1.65	1.62	1.62
E1T6	3.84	3.28	4.38	11.5	3.83333	Factor B	8	2830.19	353.774	37284.7	2.22534	S		2	3.505	#N/A	5		1.37	1.39	1.38
E1T7	3.62	3.65	3.67	10.94	3.64667	A*B	8	-2829.57	-353.696	-37276.5	2.22534	NS		3	3.48	#N/A	2		1.68	1.6	1.7
E1T8	3.71	3.6	3.71	11.02	3.67333	Error	34	0.82983	0.0244068					4	3.35833	#N/A	7		1.57	1.68	1.51
E1T9	3.58	3.55	3.55	10.68	3.56	Total	53	4.25119		t34=	2.03224			5	3.47833	#N/A	3		1.47	1.5	1.42
E2T1	3.03	3.05	3.04	9.12	3.04	SE.m	0.0901975							6	3.595	#N/A	1		1.58	1.61	1.72
E2T2	3.14	3.21	3.62	9.97	3.32333	CD	0.25923							7	3.385	#N/A	6		1.73	1.7	1.66
E2T3	3.23	3.34	3.17	9.74	3.24667	CV	4.56753							8	3.43	#N/A	4		1.45	1.48	1.46
E2T4	3.08	3.21	3.08	9.37	3.12333									9	3.32667	#N/A	8		1.55	1.5	1.53
E2T5	3.24	3.27	3.38	9.89	3.29667		Difference							SE.m	0.0637792				1.37	1.45	1.48
E2T6	3.39	3.36	3.32	10.07	3.35667	1	0.37	3.84	3.91	3.98			Factor B	CD	0.183303
E2T7	3.11	3.14	3.12	9.37	3.12333	2	0.363333	4.08	4.21	4.27
E2T8	3.21	3.1	3.25	9.56	3.18667	3	0.466667	4.25	4.17	4.22
E2T9	3.03	3.11	3.14	9.28	3.09333	4	0.47	4.09	4.11	4.08
Total	61.2	60.64	62.86	184.7	3.42037	5	0.363333	4.23	3.87	4.38
Mean	3.4	3.36889	3.49222			6	0.476667	4.34	3.78	4.88
CF	631.742					7	0.523333	4.12	4.15	4.17
TSSQ	4.25119	RSSQ	0.148104			8	0.486667	4.21	4.1	4.21
tSSQ	3.27326	ESSQ	0.82983			9	0.466667	4.08	4.05	4.05
								2.73	2.75	2.74
								2.84	2.91	3.32
								2.93	3.04	2.87
		15-30 cm						2.78	2.91	2.78
								2.94	2.97	3.08
Main factors	2							3.09	3.06	3.02
Sub factors	9	Total factors	18					2.81	2.84	2.82
Replications	3							2.91	2.8	2.95
Treatments	R1	R2	R3	Total	Mean			2.73	2.81	2.84				Factors Mean				2019
E1T1	3.15	3.22	3.29	9.66	3.22				ANOVA					1	3.45185	#N/A		6334.15
E1T2	3.39	3.52	3.58	10.49	3.49667		df	SS	MSS	Cal F	Table F	Result		2	2.97222	#N/A		5454.03
E1T3	3.76	3.28	3.53	10.57	3.52333	Replication	2	0.208781	0.104391	11.0019	3.2759	S		SE.m	0.0264346
E1T4	3.4	3.42	3.39	10.21	3.40333	Treatment	17	3.71541	0.218553	23.0336	1.93321	S	Factor A	CD	0.0759736
E1T5	3.54	3.48	3.39	10.41	3.47	Factor A	1	3.1056	3.1056	327.303	4.13002	S		1	3.015	#N/A	9	5532.53
E1T6	3.65	3.59	3.69	10.93	3.64333	Factor B	8	2497.64	312.205	32903.6	2.22534	S		2	3.29333	#N/A	5	6043.27
E1T7	3.43	3.46	3.48	10.37	3.45667	A*B	8	-2497.03	-312.128	-32895.6	2.22534	NS		3	3.27	#N/A	2	6000.45
E1T8	3.52	3.21	3.72	10.45	3.48333	Error	34	0.641485	0.0188672					4	3.165	#N/A	7	5807.78
E1T9	3.39	3.06	3.66	10.11	3.37	Total	53	4.56568		t34=	2.03224			5	3.26833	#N/A	3	5997.39
E2T1	2.8	2.82	2.81	8.43	2.81	SE.m	0.0793037							6	3.385	#N/A	1	6211.48
E2T2	3.11	2.83	3.33	9.27	3.09	CD	0.227921							7	3.175	#N/A	6	5826.13
E2T3	3	3.11	2.94	9.05	3.01667	CV	4.27635							8	3.22	#N/A	4	5908.7
E2T4	2.9	2.73	3.15	8.78	2.92667									9	3.11667	#N/A	8	5719.08
E2T5	3.01	2.84	3.35	9.2	3.06667		Difference							SE.m	0.0560762
E2T6	3.16	3.13	3.09	9.38	3.12667	1	0.41	3.35	3.42	3.49			Factor B	CD	0.161164
E2T7	2.88	2.91	2.89	8.68	2.89333	2	0.406667	3.59	3.72	3.78
E2T8	2.98	2.93	2.96	8.87	2.95667	3	0.506667	3.96	3.48	3.73
E2T9	2.8	2.88	2.91	8.59	2.86333	4	0.476667	3.6	3.62	3.59
Total	57.87	56.42	59.16	173.45	3.21204	5	0.403333	3.74	3.68	3.59
Mean	3.215	3.13444	3.28667			6	0.516667	3.85	3.79	3.89
CF	557.128					7	0.563333	3.63	3.66	3.68
TSSQ	4.56568	RSSQ	0.208781			8	0.526667	3.72	3.41	3.92
tSSQ	3.71541	ESSQ	0.641485			9	0.506667	3.59	3.26	3.86
							E2T3	2.92	2.94	2.93
							E2T4	3.23	2.95	3.45
							E2T5	3.12	3.23	3.06
		0-5 cm					E2T6	3.02	2.85	3.27
							E2T7	3.13	2.96	3.47
Main factors	2						E2T8	3.28	3.25	3.21
Sub factors	9	Total factors	18				E2T9	3	3.03	3.01
Replications	3							3.1	3.05	3.08
Treatments	R1	R2	R3	Total	Mean			2.92	3	3.03				Factors Mean
E1T1	1.34	1.31	1.28	3.93	1.31				ANOVA					1	1.54222	1
E1T2	1.38	1.71	1.67	4.76	1.58667		df	SS	MSS	Cal F	Table F	Result		2	1.47889	2
E1T3	1.61	1.62	1.62	4.85	1.61667	Replication	2	0.0790333	0.0395167	4.16471	3.2759	S		SE.m	0.0193832
E1T4	1.49	1.51	1.48	4.48	1.49333	Treatment	17	0.67995	0.0399971	4.21534	1.93321	S	Factor A	CD	0.0557078
E1T5	1.63	1.37	1.68	4.68	1.56	Factor A	1	0.05415	0.05415	5.70694	4.13002	S		1	1.315	9	9
E1T6	1.74	1.68	1.78	5.2	1.73333	Factor B	8	559.361	69.9201	7368.97	2.22534	S		2	1.595	2	5
E1T7	1.42	1.55	1.67	4.64	1.54667	A*B	8	-558.735	-69.8419	-7360.72	2.22534	NS		3	1.57167	3	2
E1T8	1.61	1.5	1.61	4.72	1.57333	Error	34	0.3449	0.0101441					4	1.44833	7	7
E1T9	1.48	1.35	1.55	4.38	1.46	Total	53	1.10388		t34=	2.03224			5	1.56833	4	3
E2T1	1.31	1.33	1.32	3.96	1.32	SE.m	0.0581496							6	1.685	1	1
E2T2	1.52	1.55	1.74	4.81	1.60333	CD	0.167123							7	1.475	6	6
E2T3	1.51	1.42	1.65	4.58	1.52667	CV	6.66761							8	1.52	5	4
E2T4	1.41	1.44	1.36	4.21	1.40333									9	1.41667	8	8
E2T5	1.32	1.75	1.66	4.73	1.57667		E1T1	1.2	1.17	1.14				SE.m	0.041118
E2T6	1.67	1.44	1.8	4.91	1.63667		E1T2	1.24	1.57	1.53			Factor B	CD	0.118174
E2T7	1.39	1.42	1.4	4.21	1.40333		E1T3	1.47	1.48	1.48
E2T8	1.49	1.44	1.47	4.4	1.46667		E1T4	1.35	1.37	1.34
E2T9	1.31	1.39	1.42	4.12	1.37333		E1T5	1.49	1.23	1.54
Total	26.63	26.78	28.16	81.57	1.51056		E1T6	1.6	1.54	1.64
Mean	1.47944	1.48778	1.56444				E1T7	1.28	1.41	1.53
CF	123.216						E1T8	1.47	1.36	1.47
TSSQ	1.10388	RSSQ	0.0790333				E1T9	1.34	1.21	1.41
tSSQ	0.67995	ESSQ	0.3449				E2T1	1.42	1.44	1.43
							E2T2	1.63	1.66	1.85
							E2T3	1.62	1.53	1.76
							E2T4	1.52	1.55	1.47
							E2T5	1.43	1.86	1.77
		BD					E2T6	1.78	1.55	1.91
		5-15 cm					E2T7	1.5	1.53	1.51
Main factors	2						E2T8	1.6	1.55	1.58
Sub factors	9	Total factors	18				E2T9	1.42	1.5	1.53
Replications	3
Treatments	R1	R2	R3	Total	Mean									Factors Mean				2019
E1T1	1.32	1.35	1.37	4.04	1.34667				ANOVA					1	1.58148	#N/A		2902.02
E1T2	1.62	1.65	1.61	4.88	1.62667		df	SS	MSS	Cal F	Table F	Result		2	1.47852	#N/A		2713.08
E1T3	1.69	1.61	1.66	4.96	1.65333	Replication	2	0.0988	0.0494	5.20633	3.2759	S		SE.m	0.0340052
E1T4	1.48	1.6	1.52	4.6	1.53333	Treatment	17	0.773667	0.0455098	4.79634	1.93321	S	Factor A	CD	0.0977319
E1T5	1.67	1.51	1.62	4.8	1.6	Factor A	1	0.143119	0.143119	15.0834	4.13002	S		1	1.33333	#N/A	9	2446.67
E1T6	1.98	1.37	1.97	5.32	1.77333	Factor B	8	573.635	71.7044	7557.02	2.22534	S		2	1.615	#N/A	5	2963.53
E1T7	1.56	1.59	1.61	4.76	1.58667	A*B	8	-573.005	-71.6256	-7548.71	2.22534	NS		3	1.59	#N/A	2	2917.65
E1T8	1.55	1.64	1.65	4.84	1.61333	Error	34	1.06153	0.0312216					4	1.46667	#N/A	7	2691.33
E1T9	1.72	1.29	1.49	4.5	1.5	Total	53	1.934		t34=	2.03224			5	1.58833	#N/A	3	2914.59
E2T1	1.31	1.13	1.52	3.96	1.32	SE.m	0.102016							6	1.705	#N/A	1	3128.68
E2T2	1.42	1.49	1.9	4.81	1.60333	CD	0.293196							7	1.495	#N/A	6	2743.33
E2T3	1.51	1.82	1.25	4.58	1.52667	CV	11.5488							8	1.54	#N/A	4	2825.9
E2T4	1.41	1.39	1.4	4.2	1.4									9	1.43667	#N/A	8	2636.28
E2T5	1.72	1.25	1.76	4.73	1.57667		Difference							SE.m	0.0721359
E2T6	1.67	1.44	1.8	4.91	1.63667	1	0.0266667	1.29	1.32	1.34			Factor B	CD	0.207321
E2T7	1.39	1.22	1.6	4.21	1.40333	2	0.0233333	1.59	1.62	1.58
E2T8	1.49	1.63	1.28	4.4	1.46667	3	0.126667	1.66	1.58	1.63
E2T9	1.21	1.54	1.37	4.12	1.37333	4	0.133333	1.45	1.57	1.49
Total	27.72	26.52	28.38	82.62	1.53	5	0.0233333	1.64	1.48	1.59
Mean	1.54	1.47333	1.57667			6	0.136667	1.95	1.34	1.94
CF	126.409					7	0.183333	1.53	1.56	1.58
TSSQ	1.934	RSSQ	0.0988			8	0.146667	1.52	1.61	1.62
tSSQ	0.773667	ESSQ	1.06153			9	0.126667	1.69	1.26	1.46
								1.34	1.16	1.55
								1.45	1.52	1.93
								1.54	1.85	1.28
		15-30 cm						1.44	1.42	1.43
								1.75	1.28	1.79
Main factors	2							1.7	1.47	1.83									1.51	1.48	1.45
Sub factors	9	Total factors	18					1.42	1.25	1.63									1.75	1.78	1.74
Replications	3							1.52	1.66	1.31									1.78	1.78	1.79
Treatments	R1	R2	R3	Total	Mean			1.24	1.57	1.4				Factors Mean					1.66	1.68	1.65
E1T1	2.95	3.02	3.09	9.06	3.02				ANOVA					1	3.25185	#N/A			1.7	1.74	1.75
E1T2	3.19	3.32	3.38	9.89	3.29667		df	SS	MSS	Cal F	Table F	Result		2	2.84481	#N/A			1.91	1.85	1.95
E1T3	3.76	2.88	3.33	9.97	3.32333	Replication	2	0.360744	0.180372	19.0097	3.2759	S		SE.m	0.0325762				1.69	1.72	1.74
E1T4	3.2	3.22	3.19	9.61	3.20333	Treatment	17	2.92322	0.171954	18.1224	1.93321	S	Factor A	CD	0.0936249				1.78	1.67	1.78
E1T5	3.54	3.08	3.19	9.81	3.27	Factor A	1	2.23667	2.23667	235.725	4.13002	S		1	2.82167	#N/A	9		1.65	1.62	1.62
E1T6	3.45	3.39	3.49	10.33	3.44333	Factor B	8	2250.59	281.324	29649.1	2.22534	S		2	3.13333	#N/A	5		1.37	1.39	1.38
E1T7	3.23	3.26	3.28	9.77	3.25667	A*B	8	-2249.9	-281.238	-29640	2.22534	NS		3	3.11	#N/A	2		1.68	1.6	1.7
E1T8	3.32	3.01	3.52	9.85	3.28333	Error	34	0.974189	0.0286526					4	3.005	#N/A	7		1.57	1.68	1.51
E1T9	3.29	2.76	3.46	9.51	3.17	Total	53	4.25815		t34=	2.03224			5	3.10833	#N/A	3		1.47	1.5	1.42
E2T1	2.68	2.5	2.69	7.87	2.62333	SE.m	0.0977286							6	3.225	#N/A	1		1.58	1.61	1.72
E2T2	2.99	2.71	3.21	8.91	2.97	CD	0.280875							7	3.015	#N/A	6		1.73	1.7	1.66
E2T3	2.88	2.99	2.82	8.69	2.89667	CV	5.5529							8	3.06	#N/A	4		1.45	1.48	1.46
E2T4	2.78	2.61	3.03	8.42	2.80667									9	2.95667	#N/A	8		1.55	1.5	1.53
E2T5	2.89	2.72	3.23	8.84	2.94667		Difference							SE.m	0.0691045				1.37	1.45	1.48
E2T6	3.04	3.01	2.97	9.02	3.00667	1	0.396667	2.97	3.04	3.11			Factor B	CD	0.198608
E2T7	2.76	2.79	2.77	8.32	2.77333	2	0.326667	3.21	3.34	3.4
E2T8	2.86	2.81	2.84	8.51	2.83667	3	0.426667	3.78	2.9	3.35
E2T9	2.68	2.76	2.79	8.23	2.74333	4	0.396667	3.22	3.24	3.21
Total	55.49	52.84	56.28	164.61	3.04833	5	0.323333	3.56	3.1	3.21
Mean	3.08278	2.93556	3.12667			6	0.436667	3.47	3.41	3.51
CF	501.786					7	0.483333	3.25	3.28	3.3
TSSQ	4.25815	RSSQ	0.360744			8	0.446667	3.34	3.03	3.54
tSSQ	2.92322	ESSQ	0.974189			9	0.426667	3.31	2.78	3.48
								2.66	2.48	2.67
								2.97	2.69	3.19
		EC						2.86	2.97	2.8
		2019						2.76	2.59	3.01
								2.87	2.7	3.21
Main factors	2							3.02	2.99	2.95
Sub factors	9	Total factors	18					2.74	2.77	2.75
Replications	3							2.84	2.79	2.82
Treatments	R1	R2	R3	Total	Mean			2.66	2.74	2.77				Factors Mean				2019
E1T1	0.2	0.18	0.2	0.58	0.193333				ANOVA					1	0.259801	#N/A		476.734
E1T2	0.267148	0.27	0.29	0.827148	0.275716		df	SS	MSS	Cal F	Table F	Result		2	0.222222	#N/A		407.778
E1T3	0.27	0.24	0.26	0.77	0.256667	Replication	2	0.000442983	0.000221492	0.0233433	3.2759	NS		SE.m	0.00355793
E1T4	0.24	0.24	0.25	0.73	0.243333	Treatment	17	0.069621	0.00409535	0.431614	1.93321	NS	Factor A	CD	0.0102256
E1T5	0.297472	0.29	0.28	0.867472	0.289157	Factor A	1	0.019064	0.019064	2.00917	4.13002	NS		1	0.173333	#N/A	9	318.067
E1T6	0.28	0.29	0.29	0.86	0.286667	Factor B	8	14.3344	1.7918	188.84	2.22534	S		2	0.246191	#N/A	5	451.761
E1T7	0.27	0.24	0.26	0.77	0.256667	A*B	8	-14.2839	-1.78548	-188.174	2.22534	NS		3	0.268333	#N/A	2	492.392
E1T8	0.27	0.29	0.28	0.84	0.28	Error	34	0.0116208	0.000341789					4	0.236667	#N/A	7	434.283
E1T9	0.26	0.22	0.29	0.77	0.256667	Total	53	0.0816848		t34=	2.03224			5	0.252912	#N/A	3	464.094
E2T1	0.2	0.16	0.1	0.46	0.153333	SE.m	0.0106738							6	0.271667	#N/A	1	498.508
E2T2	0.21	0.22	0.22	0.65	0.216667	CD	0.0306768							7	0.243333	#N/A	6	446.517
E2T3	0.29	0.28	0.27	0.84	0.28	CV	7.67081							8	0.246667	#N/A	4	452.633
E2T4	0.23	0.24	0.22	0.69	0.23									9	0.23	#N/A	8	422.05
E2T5	0.22	0.22	0.21	0.65	0.216667		Difference							SE.m	0.00754751
E2T6	0.26	0.23	0.28	0.77	0.256667	1	0.04	0.19	0.17	0.19			Factor B	CD	0.0216917
E2T7	0.22	0.23	0.24	0.69	0.23	2	0.0590493	0.257148	0.26	0.28
E2T8	0.21	0.23	0.2	0.64	0.213333	3	-0.0233333	0.26	0.23	0.25
E2T9	0.2	0.2	0.21	0.61	0.203333	4	0.0133333	0.23	0.23	0.24
Total	4.39462	4.27	4.35	13.0146	0.241011	5	0.0724907	0.287472	0.28	0.27
Mean	0.244146	0.237222	0.241667			6	0.03	0.27	0.28	0.28
CF	3.13667					7	0.0266667	0.26	0.23	0.25
TSSQ	0.0816848	RSSQ	0.000442983			8	0.0666667	0.26	0.28	0.27
tSSQ	0.069621	ESSQ	0.0116208			9	0.0533333	0.25	0.21	0.28
							E2T3	0.19	0.15	0.09
							E2T4	0.2	0.21	0.21
							E2T5	0.28	0.27	0.26
							E2T6	0.22	0.23	0.21
		2020					E2T7	0.21	0.21	0.2
Main factors	2						E2T8	0.25	0.22	0.27
Sub factors	9	Total factors	18				E2T9	0.21	0.22	0.23
Replications	3							0.2	0.22	0.19
Treatments	R1	R2	R3	Total	Mean			0.19	0.19	0.2				Factors Mean
E1T1	0.19	0.17	0.19	0.55	0.183333				ANOVA					1	0.249801	#N/A
E1T2	0.257148	0.26	0.28	0.797148	0.265716		df	SS	MSS	Cal F	Table F	Result		2	0.214074	#N/A
E1T3	0.26	0.23	0.25	0.74	0.246667	Replication	2	0.00186776	0.00093388	0.0984228	3.2759	NS		SE.m	0.00270749
E1T4	0.23	0.22	0.25	0.7	0.233333	Treatment	17	0.0744402	0.00437884	0.461491	1.93321	NS	Factor A	CD	0.00778139
E1T5	0.287472	0.28	0.27	0.837472	0.279157	Factor A	1	0.0172313	0.0172313	1.81603	4.13002	NS		1	0.221667	#N/A	9
E1T6	0.27	0.28	0.28	0.83	0.276667	Factor B	8	13.1156	1.63946	172.784	2.22534	S		2	0.251191	#N/A	5
E1T7	0.26	0.23	0.25	0.74	0.246667	A*B	8	-13.0584	-1.63231	-172.031	2.22534	NS		3	0.193333	#N/A	2
E1T8	0.26	0.28	0.27	0.81	0.27	Error	34	0.00672939	0.000197923					4	0.215	#N/A	7
E1T9	0.25	0.24	0.25	0.74	0.246667	Total	53	0.0830374		t34=	2.03224			5	0.271245	#N/A	3
E2T1	0.25	0.27	0.26	0.78	0.26	SE.m	0.00812246							6	0.233333	#N/A	1
E2T2	0.24	0.2	0.27	0.71	0.236667	CD	0.0233442							7	0.221667	#N/A	6
E2T3	0.16	0.13	0.13	0.42	0.14	CV	6.06565							8	0.251667	#N/A	4
E2T4	0.19	0.2	0.2	0.59	0.196667		E1T1	7.29	7.27	7.29				9	0.228333	#N/A	8
E2T5	0.27	0.23	0.29	0.79	0.263333		E1T2	7.35715	7.36	7.38				SE.m	0.00574345
E2T6	0.2	0.17	0.2	0.57	0.19		E1T3	7.36	7.33	7.35			Factor B	CD	0.0165068
E2T7	0.2	0.2	0.19	0.59	0.196667		E1T4	7.33	7.32	7.35
E2T8	0.24	0.23	0.23	0.7	0.233333		E1T5	7.38747	7.38	7.37
E2T9	0.2	0.21	0.22	0.63	0.21		E1T6	7.37	7.38	7.38
Total	4.21462	4.03	4.28	12.5246	0.231937		E1T7	7.36	7.33	7.35
Mean	0.234146	0.223889	0.237778				E1T8	7.36	7.38	7.37
CF	2.90493						E1T9	7.35	7.34	7.35
TSSQ	0.0830374	RSSQ	0.00186776				E2T1	7.35	7.37	7.36
tSSQ	0.0744402	ESSQ	0.00672939				E2T2	7.34	7.3	7.37
							E2T3	7.26	7.23	7.23
							E2T4	7.29	7.3	7.3
							E2T5	7.37	7.33	7.39
							E2T6	7.3	7.27	7.3
							E2T7	7.3	7.3	7.29
							E2T8	7.34	7.33	7.33
							E2T9	7.3	7.31	7.32
		2019
		PH						4.19462	4.01	4.26
								0.214146	0.203889	0.217778
Main factors	2							2.88493	-0.02	-0.02
Sub factors	9	Total factors	18					0.0630374	#VALUE!	-0.0181322
Replications	3							0.0544402	#VALUE!	-0.0132706
Treatments	R1	R2	R3	Total	Mean			-0.02	-0.02	-0.02				Factors Mean				2019
E1T1	7.85	7.83	7.85	23.53	7.84333				ANOVA					1	7.89758	#N/A		14492.1
E1T2	7.91715	7.92	7.94	23.7771	7.92572		df	SS	MSS	Cal F	Table F	Result		2	7.39407	#N/A		13568.1
E1T3	7.82	7.89	8.01	23.72	7.90667	Replication	2	0.205585	0.102792	10.8334	3.2759	S		SE.m	0.029229
E1T4	7.89	7.88	7.91	23.68	7.89333	Treatment	17	3.49035	0.205315	21.6384	1.93321	S	Factor A	CD	0.084005
E1T5	7.94747	7.94	7.93	23.8175	7.93916	Factor A	1	3.42248	3.42248	360.699	4.13002	S		1	7.64167	#N/A	9	14022.5
E1T6	7.93	7.74	8.1	23.77	7.92333	Factor B	8	14029.1	1753.64	184818	2.22534	S		2	7.67119	#N/A	5	14076.6
E1T7	7.92	7.89	7.91	23.72	7.90667	A*B	8	-14029	-1753.63	-184817	2.22534	NS		3	7.61333	#N/A	2	13970.5
E1T8	7.9	7.2	8.4	23.5	7.83333	Error	34	0.784279	0.023067					4	7.635	#N/A	7	14010.2
E1T9	7.91	7.9	7.91	23.72	7.90667	Total	53	4.48022		t34=	2.03224			5	7.69125	#N/A	3	14113.4
E2T1	7.43	7.45	7.44	22.32	7.44	SE.m	0.087687							6	7.64667	#N/A	1	14031.6
E2T2	7.42	7.38	7.45	22.25	7.41667	CD	0.252015							7	7.64167	#N/A	6	14022.5
E2T3	7.34	7.31	7.31	21.96	7.32	CV	1.98642							8	7.62333	#N/A	4	13988.8
E2T4	7.37	7.18	7.58	22.13	7.37667									9	7.64833	#N/A	8	14034.7
E2T5	7.45	7.41	7.47	22.33	7.44333		Difference							SE.m	0.0620041
E2T6	7.38	7.15	7.58	22.11	7.37	1	0.403333	7.79	7.77	7.79			Factor B	CD	0.178201
E2T7	7.38	7.38	7.37	22.13	7.37667	2	0.509049	7.85715	7.86	7.88
E2T8	7.42	7.41	7.41	22.24	7.41333	3	0.586667	7.76	7.83	7.95
E2T9	7.38	7.39	7.4	22.17	7.39	4	0.516667	7.83	7.82	7.85
Total	137.655	136.25	138.97	412.875	7.64583	5	0.495824	7.88747	7.88	7.87
Mean	7.64748	7.56944	7.72056			6	0.553333	7.87	7.68	8.04
CF	3156.77					7	0.53	7.86	7.83	7.85
TSSQ	4.48022	RSSQ	0.205585			8	0.42	7.84	7.14	8.34
tSSQ	3.49035	ESSQ	0.784279			9	0.516667	7.85	7.84	7.85
							E2T3	7.35	7.37	7.36
							E2T4	7.34	7.3	7.37
							E2T5	7.26	7.23	7.23
		2020					E2T6	7.29	7.1	7.5
		PH					E2T7	7.37	7.33	7.39
Main factors	2						E2T8	7.3	7.07	7.5
Sub factors	9	Total factors	18				E2T9	7.3	7.3	7.29
Replications	3							7.34	7.33	7.33
Treatments	R1	R2	R3	Total	Mean			7.3	7.31	7.32				Factors Mean
E1T1	7.79	7.77	7.79	23.35	7.78333				ANOVA					1	7.82842	#N/A
E1T2	7.96	7.76	7.88	23.6	7.86667		df	SS	MSS	Cal F	Table F	Result		2	7.31111	#N/A
E1T3	7.85	7.63	7.95	23.43	7.81	Replication	2	0.027244	0.013622	1.43564	3.2759	NS		SE.m	0.0212733
E1T4	7.83	7.82	7.85	23.5	7.83333	Treatment	17	3.7214	0.218906	23.0708	1.93321	S	Factor A	CD	0.06114
E1T5	7.88747	7.88	7.87	23.6375	7.87916	Factor A	1	3.61278	3.61278	380.756	4.13002	S		1	7.57167	#N/A	9
E1T6	7.87	7.88	7.88	23.63	7.87667	Factor B	8	13756.4	1719.55	181225	2.22534	S		2	7.605	#N/A	5
E1T7	7.66	7.93	7.95	23.54	7.84667	A*B	8	-13756.3	-1719.53	-181224	2.22534	NS		3	7.525	#N/A	2
E1T8	7.86	7.58	7.7	23.14	7.71333	Error	34	0.415443	0.0122189					4	7.565	#N/A	7
E1T9	7.85	7.84	7.85	23.54	7.84667	Total	53	4.16409		t34=	2.03224			5	7.62125	#N/A	3
E2T1	7.25	7.47	7.36	22.08	7.36	SE.m	0.0638198							6	7.58333	#N/A	1
E2T2	7.3	7.36	7.37	22.03	7.34333	CD	0.18342							7	7.58833	#N/A	6
E2T3	7.26	7.23	7.23	21.72	7.24	CV	1.46027							8	7.50667	#N/A	4
E2T4	7.29	7.3	7.3	21.89	7.29667		E1T1	7.73	7.71	7.73				9	7.56167	#N/A	8
E2T5	7.37	7.33	7.39	22.09	7.36333		E1T2	7.9	7.7	7.82				SE.m	0.0451274
E2T6	7.3	7.27	7.3	21.87	7.29		E1T3	7.79	7.57	7.89			Factor B	CD	0.129697
E2T7	7.3	7.1	7.59	21.99	7.33		E1T4	7.77	7.76	7.79
E2T8	7.34	7.23	7.33	21.9	7.3		E1T5	7.82747	7.82	7.81
E2T9	7.5	7.31	7.02	21.83	7.27667		E1T6	7.81	7.82	7.82
Total	136.467	135.69	136.61	408.767	7.56977		E1T7	7.6	7.87	7.89
Mean	7.58153	7.53833	7.58944				E1T8	7.8	7.52	7.64
CF	3094.27						E1T9	7.79	7.78	7.79
TSSQ	4.16409	RSSQ	0.027244				E2T1	7.26	7.48	7.37
tSSQ	3.7214	ESSQ	0.415443				E2T2	7.31	7.37	7.38

## Sheet: WF
		2019
		WP
Main factors	2
Sub factors	9	Total factors	18
Replications	3
Treatments	R1	R2	R3	Total	Mean									Factors Mean
E1T1	0.212	0.1888	0.17248	0.57328	0.191093				ANOVA					1	0.356905	2		Treatments	R1	R2	R3
E1T2	0.324167	0.351667	0.3625	1.03833	0.346111		df	SS	MSS	Cal F	Table F	Result		2	0.41245	1		E1T1	21.2	18.88	17.248			Nutrient applied
E1T3	0.408403	0.399664	0.384874	1.19294	0.397647	Replication	2	0.000348053	0.000174027	0.350641	3.2759	NS		SE.m	0.00428741			E1T2	32.4167	35.1667	36.25		N1	0			0.0747778
E1T4	0.329915	0.323077	0.309402	0.962393	0.320798	Treatment	17	0.432735	0.025455	51.2885	1.93321	S	Factor A	CD	0.0123221			E1T3	40.8403	39.9664	38.4874		N2	150
E1T5	0.398261	0.413913	0.386957	1.19913	0.39971	Factor A	1	0.0416509	0.0416509	83.9211	4.13002	S		1	0.194476	9	9	E1T4	32.9915	32.3077	30.9402		N3	187.5
E1T6	0.488679	0.469811	0.450943	1.40943	0.469811	Factor B	8	37.7246	4.71557	9501.26	2.22534	S		2	0.350257	7	5	E1T5	39.8261	41.3913	38.6957		N4	71.6
E1T7	0.362162	0.355856	0.35045	1.06847	0.356156	A*B	8	-37.3335	-4.66668	-9402.76	2.22534	NS		3	0.426601	3	2	E1T6	48.8679	46.9811	45.0943		N5	150
E1T8	0.399083	0.389908	0.384404	1.17339	0.391131	Error	34	0.0168745	0.00049631					4	0.349793	8	7	E1T7	36.2162	35.5856	35.045		N6	170
E1T9	0.347619	0.34	0.331429	1.01905	0.339683	Total	53	0.449958		t34=	2.03224			5	0.416175	4	3	E1T8	39.9083	38.9908	38.4404		N7	112.5
E2T1	0.243119	0.143119	0.207339	0.593578	0.197859	SE.m	0.0128622							6	0.522207	1	1	E1T9	34.7619	34	33.1429		N8	132.5
E2T2	0.363208	0.343396	0.356604	1.06321	0.354403	CD	0.0369664				-0.055545			7	0.381882	6	6	E2T1	24.3119	14.3119	20.7339		N9	20
E2T3	0.468627	0.458824	0.439216	1.36667	0.455556	CV	5.79136							8	0.434013	2	4	E2T2	36.3208	34.3396	35.6604
E2T4	0.371717	0.362626	0.40202	1.13636	0.378788									9	0.386689	5	8	E2T3	46.8627	45.8824	43.9216
E2T5	0.380208	0.475	0.442708	1.29792	0.432639									SE.m	0.00909496			E2T4	37.1717	36.2626	40.202
E2T6	0.557143	0.604762	0.561905	1.72381	0.574603								Factor B	CD	0.0261392			E2T5	38.0208	47.5	44.2708
E2T7	0.411957	0.41087	0.4	1.22283	0.407609													E2T6	55.7143	60.4762	56.1905
E2T8	0.464773	0.475	0.490909	1.43068	0.476894													E2T7	41.1957	41.087	40
E2T9	0.420798	0.454655	0.425635	1.30109	0.433696													E2T8	46.4773	47.5	49.0909
Total	6.95184	6.96095	6.85977	20.7726	0.384677													E2T9	42.0798	45.4655	42.5635
Mean	0.386213	0.386719	0.381099
CF	7.99073
TSSQ	0.449958	RSSQ	0.000348053
tSSQ	0.432735	ESSQ	0.0168745
		WF
		Blue
Main factors	2
Sub factors	9	Total factors	18
Replications	3
Treatments	R1	R2	R3	Total	Mean									Factors Mean
E1T1	2747.93	3074.58	3738.03	9560.53	3186.84				ANOVA					1	1622.21	1
E1T2	1677.49	1636.41	1827.12	5141.02	1713.67		df	SS	MSS	Cal F	Table F	Result		2	1271.03	2
E1T3	1591.41	1393.72	1319.2	4304.33	1434.78	Replication	2	162466	81232.9	1.63674e+08	3.2759	S		SE.m	66.7052
E1T4	1456.41	1497.8	1512.82	4467.04	1489.01	Treatment	17	2.72338e+07	1.60199e+06	3.2278e+09	1.93321	S	Factor A	CD	191.713
E1T5	1605.76	1670.76	1712.95	4989.47	1663.16	Factor A	1	1.66495e+06	1.66495e+06	3.35467e+09	4.13002	S		1	3303.32	1	9
E1T6	1345.31	1396.35	1435.39	4177.04	1392.35	Factor B	8	6.87058e+08	8.58822e+07	1.73041e+11	2.22534	S		2	1423.56	2	5
E1T7	1160.38	1263.55	1358.83	3782.76	1260.92	A*B	8	-6.61489e+08	-8.26861e+07	-1.66602e+11	2.22534	NS		3	1404.69	3	2
E1T8	1282.4	1313.88	1364.88	3961.16	1320.39	Error	34	4.08471e+06	120139					4	1281.13	4	7
E1T9	1044.67	1168.65	1203.01	3416.33	1138.78	Total	53	3.1481e+07		t34=	2.03224			5	1279.22	5	3
E2T1	2376.7	4893.78	2988.89	10259.4	3419.79	SE.m	200.116							6	1118.46	8	1
E2T2	1204.97	1242.37	953	3400.34	1133.45	CD	575.138							7	1166.36	6	6
E2T3	1334.66	1422.85	1366.3	4123.82	1374.61	CV	23.96							8	1133.87	7	4
E2T4	1057.09	1054.69	1107.96	3219.75	1073.25									9	908.955	9	8
E2T5	971.094	808.716	906.055	2685.86	895.288									SE.m	141.503
E2T6	892.208	848.673	792.845	2533.73	844.575								Factor B	CD	406.684
E2T7	1317	901.361	997.02	3215.39	1071.8
E2T8	915.339	937.022	989.707	2842.07	947.356
E2T9	755.575	600.465	681.355	2037.39	679.132
Total	24736.4	27125.6	26255.4	78117.4	1446.62
Mean	1374.24	1506.98	1458.63
CF	1.13006e+08
TSSQ	3.1481e+07	RSSQ	162466
tSSQ	2.72338e+07	ESSQ	4.08471e+06
		green
Main factors	2
Sub factors	9	Total factors	18
Replications	3
Treatments	R1	R2	R3	Total	Mean									Factors Mean
E1T1	243.15	224.567	233.02	700.737	233.579				ANOVA					1	118.576	1
E1T2	122.523	119.523	133.452	375.499	125.166		df	SS	MSS	Cal F	Table F	Result		2	107.648	2
E1T3	116.236	101.797	96.3537	314.387	104.796	Replication	2	147.518	73.759	148615	3.2759	S		SE.m	2.08993
E1T4	106.376	109.399	110.496	326.271	108.757	Treatment	17	168962	9938.94	2.00257e+07	1.93321	S	Factor A	CD	6.00652
E1T5	117.284	122.032	125.114	364.43	121.477	Factor A	1	1612.11	1612.11	3.2482e+06	4.13002	S		1	261.621	1	9
E1T6	98.2608	101.989	104.841	305.09	101.697	Factor B	8	4.24448e+06	530560	1.06901e+09	2.22534	S		2	110.579	3	5
E1T7	84.7537	92.2893	99.2485	276.291	92.0972	A*B	8	-4.07713e+06	-509642	-1.02686e+09	2.22534	NS		3	110.606	2	2
E1T8	93.666	95.9651	99.6906	289.322	96.4406	Error	34	4009.65	117.931					4	99.8255	4	7
E1T9	76.3026	85.3581	87.8674	249.528	83.1761	Total	53	173119		t34=	2.03224			5	98.6495	5	3
E2T1	301.28	314.58	253.131	868.991	289.664	SE.m	6.26979							6	86.6121	8	1
E2T2	102.05	105.217	80.7101	287.977	95.9923	CD	18.0195							7	91.4341	6	6
E2T3	113.033	120.502	115.713	349.248	116.416	CV	9.60073							8	88.3363	7	4
E2T4	89.5255	89.3226	93.834	272.682	90.894									9	70.346	9	8
E2T5	82.2425	68.4906	76.7343	227.467	75.8225									SE.m	4.43341
E2T6	75.5616	71.8746	67.1464	214.583	71.5276								Factor B	CD	12.7417
E2T7	111.538	76.3368	84.4382	272.313	90.771
E2T8	77.5205	79.3569	83.8188	240.696	80.2321
E2T9	63.99	50.8537	57.7043	172.548	57.516
Total	2075.29	2029.45	2003.31	6108.06	113.112
Mean	115.294	112.747	111.295
CF	690896
TSSQ	173119	RSSQ	147.518
tSSQ	168962	ESSQ	4009.65
		grey
Main factors	2
Sub factors	9	Total factors	18
Replications	3
Treatments	R1	R2	R3	Total	Mean									Factors Mean
E1T1	2.95158	3.30245	4.01506	10.2691	3.42303				ANOVA					1	1.74244	1
E1T2	1.80181	1.75769	1.96253	5.52204	1.84068		df	SS	MSS	Cal F	Table F	Result		2	1.38005	2
E1T3	1.70935	1.49701	1.41697	4.62334	1.54111	Replication	2	0.190297	0.0951486	191.712	3.2759	S		SE.m	0.0723191
E1T4	1.56435	1.60881	1.62494	4.7981	1.59937	Treatment	17	31.6881	1.86401	3755.73	1.93321	S	Factor A	CD	0.207847
E1T5	1.72477	1.79459	1.83991	5.35926	1.78642	Factor A	1	1.77289	1.77289	3572.14	4.13002	S		1	3.56808	1	9
E1T6	1.44501	1.49984	1.54177	4.48662	1.49554	Factor B	8	800.8	100.1	201688	2.22534	S		2	1.53568	2	5
E1T7	1.24638	1.3572	1.45954	4.06311	1.35437	A*B	8	-770.885	-96.3606	-194154	2.22534	NS		3	1.51681	3	2
E1T8	1.37744	1.41125	1.46604	4.25473	1.41824	Error	34	4.80119	0.141212					4	1.38234	4	7
E1T9	1.1221	1.25527	1.29217	3.66953	1.22318	Total	53	36.6796		t34=	2.03224			5	1.37925	5	3
E2T1	2.58057	5.31355	3.24527	11.1394	3.71313	SE.m	0.216957							6	1.20628	8	1
E2T2	1.30833	1.34894	1.03475	3.69201	1.23067	CD	0.623542							7	1.25905	6	6
E2T3	1.44914	1.5449	1.4835	4.47754	1.49251	CV	24.0693							8	1.22343	7	4
E2T4	1.14776	1.14516	1.203	3.49592	1.16531									9	0.980281	9	8
E2T5	1.05439	0.878085	0.983773	2.91625	0.972083									SE.m	0.153412
E2T6	0.968738	0.921469	0.860852	2.75106	0.91702								Factor B	CD	0.440911
E2T7	1.42997	0.978677	1.08254	3.49119	1.16373
E2T8	0.993853	1.0174	1.0746	3.08585	1.02862
E2T9	0.820385	0.651971	0.739799	2.21215	0.737385
Total	26.6959	29.2843	28.327	84.3072	1.56124
Mean	1.48311	1.6269	1.57372
CF	131.624
TSSQ	36.6796	RSSQ	0.190297
tSSQ	31.6881	ESSQ	4.80119
		total
Main factors	2
Sub factors	9	Total factors	18
Replications	3
Treatments	R1	R2	R3	Total	Mean									Factors Mean
E1T1	2994.03	3302.45	3975.06	10271.5	3423.85				ANOVA					1	1742.53	1	1
E1T2	1801.81	1757.69	1962.53	5522.04	1840.68		df	SS	MSS	Cal F	Table F	Result		2	1380.05	2	2
E1T3	1709.35	1497.01	1416.97	4623.34	1541.11	Replication	2	155694	77847.1	1.56852e+08	3.2759	S		SE.m	67.8457
E1T4	1564.35	1608.81	1624.94	4798.1	1599.37	Treatment	17	3.16977e+07	1.86457e+06	3.75687e+09	1.93321	S	Factor A	CD	194.99
E1T5	1724.77	1794.59	1839.91	5359.26	1786.42	Factor A	1	1.77373e+06	1.77373e+06	3.57383e+09	4.13002	S		1	3568.51	1	9
E1T6	1445.01	1499.84	1541.77	4486.62	1495.54	Factor B	8	8.00901e+08	1.00113e+08	2.01714e+11	2.22534	S		2	1535.68	2	5
E1T7	1246.38	1357.2	1459.54	4063.11	1354.37	A*B	8	-7.70977e+08	-9.63722e+07	-1.94177e+11	2.22534	NS		3	1516.81	3	2
E1T8	1377.44	1411.25	1466.04	4254.73	1418.24	Error	34	4.22559e+06	124282					4	1382.34	4	7
E1T9	1122.1	1255.27	1292.17	3669.53	1223.18	Total	53	3.6079e+07		t34=	2.03224			5	1379.25	5	3
E2T1	2680.56	5213.67	3245.27	11139.5	3713.17	SE.m	203.537							6	1206.28	8	1
E2T2	1308.33	1348.94	1034.75	3692.01	1230.67	CD	584.971							7	1259.05	6	6
E2T3	1449.14	1544.9	1483.5	4477.54	1492.51	CV	22.5798							8	1223.43	7	4
E2T4	1147.76	1145.16	1203	3495.92	1165.31									9	980.281	9	8
E2T5	1054.39	878.085	983.773	2916.25	972.083									SE.m	143.923
E2T6	968.738	921.469	860.852	2751.06	917.02								Factor B	CD	413.637
E2T7	1429.97	978.677	1082.54	3491.19	1163.73
E2T8	993.853	1017.4	1074.6	3085.85	1028.62
E2T9	820.385	651.971	739.799	2212.15	737.385
Total	26838.4	29184.4	28287	84309.7	1561.29
Mean	1491.02	1621.35	1571.5
CF	1.31632e+08
TSSQ	3.6079e+07	RSSQ	155694
tSSQ	3.16977e+07	ESSQ	4.22559e+06
		2020
		WP
Main factors	2
Sub factors	9	Total factors	18
Replications	3
Treatments	R1	R2	R3	Total	Mean									Factors Mean
E1T1	0.209818	0.172605	0.18654	0.568963	0.189654				ANOVA					1	0.357879	2		Treatments	R1	R2	R3
E1T2	0.326403	0.359736	0.367162	1.0533	0.3511		df	SS	MSS	Cal F	Table F	Result		2	0.419384	1		E1T1	20.9818	17.2605	18.654			Nutrient applied
E1T3	0.410788	0.40332	0.385892	1.2	0.4	Replication	2	0.000562996	0.000281498	0.567182	3.2759	NS		SE.m	0.00488504			E1T2	32.6403	35.9736	36.7162		N1	0			0.0777232
E1T4	0.333333	0.327441	0.309764	0.970539	0.323513	Treatment	17	0.441685	0.0259815	52.3493	1.93321	S	Factor A	CD	0.0140397			E1T3	41.0788	40.332	38.5892		N2	150
E1T5	0.398116	0.418664	0.390411	1.20719	0.402397	Factor A	1	0.0510695	0.0510695	102.898	4.13002	S		1	0.199676	9	9	E1T4	33.3333	32.7441	30.9764		N3	187.5
E1T6	0.48524	0.468635	0.451107	1.40498	0.468327	Factor B	8	38.5153	4.81442	9700.42	2.22534	S		2	0.35458	7	5	E1T5	39.8116	41.8664	39.0411		N4	71.6
E1T7	0.349736	0.346221	0.358524	1.05448	0.351494	A*B	8	-38.1247	-4.76559	-9602.04	2.22534	NS		3	0.434037	3	2	E1T6	48.524	46.8635	45.1107		N5	150
E1T8	0.398927	0.391771	0.382826	1.17352	0.391175	Error	34	0.0219068	0.000644316					4	0.347943	8	7	E1T7	34.9736	34.6221	35.8524		N6	170
E1T9	0.3671	0.342007	0.320632	1.02974	0.343247	Total	53	0.464155		t34=	2.03224			5	0.422445	4	3	E1T8	39.8927	39.1771	38.2826		N7	112.5
E2T1	0.182727	0.205455	0.240909	0.629091	0.209697	SE.m	0.0146551							6	0.523883	1	1	E1T9	36.71	34.2007	32.0632		N8	132.5
E2T2	0.373709	0.329577	0.370892	1.07418	0.358059	CD	0.0421192				-0.0615055			7	0.387493	6	6	E2T1	18.2727	20.5455	24.0909		N9	20
E2T3	0.480845	0.486248	0.437132	1.40422	0.468075	CV	6.53148							8	0.439554	2	4	E2T2	37.3709	32.9577	37.0892
E2T4	0.384384	0.378378	0.354354	1.11712	0.372372									9	0.388071	5	8	E2T3	48.0845	48.6248	43.7132
E2T5	0.387397	0.490702	0.44938	1.32748	0.442493		Difference							SE.m	0.0103627			E2T4	38.4384	37.8378	35.4354
E2T6	0.554907	0.625	0.558411	1.73832	0.579439	1	-0.0200427						Factor B	CD	0.0297828			E2T5	38.7397	49.0702	44.938
E2T7	0.436422	0.385776	0.448276	1.27047	0.423491	2	-0.00695936											E2T6	55.4907	62.5	55.8411
E2T8	0.469457	0.4819	0.512443	1.4638	0.487934	3	-0.0680747											E2T7	43.6422	38.5776	44.8276
E2T9	0.425329	0.461171	0.412186	1.29869	0.432895	4	-0.0488595											E2T8	46.9457	48.19	51.2443
Total	6.97464	7.07461	6.93684	20.9861	0.388631	5	-0.0400959											E2T9	42.5329	46.1171	41.2186
Mean	0.38748	0.393034	0.38538			6	-0.111112
CF	8.15585					7	-0.0719975
TSSQ	0.464155	RSSQ	0.000562996			8	-0.0967589
tSSQ	0.441685	ESSQ	0.0219068			9	-0.0896487
		WF
		Blue
Main factors	2
Sub factors	9	Total factors	18
Replications	3
Treatments	R1	R2	R3	Total	Mean									Factors Mean
E1T1	2801.97	3720.31	3250.11	9772.39	3257.46				ANOVA					1	1646.08	1
E1T2	1561.29	1600.18	1774.39	4935.86	1645.29		df	SS	MSS	Cal F	Table F	Result		2	1232.89	2
E1T3	1710.33	1448.49	1435.54	4594.36	1531.45	Replication	2	4841.52	2420.76	4.87751e+06	3.2759	S		SE.m	41.3846
E1T4	1543.66	1582.61	1494.12	4620.39	1540.13	Treatment	17	2.35703e+07	1.38649e+06	2.79359e+09	1.93321	S	Factor A	CD	118.941
E1T5	1499.25	1678.62	1834.97	5012.84	1670.95	Factor A	1	2.30477e+06	2.30477e+06	4.64381e+09	4.13002	S		1	3140.05	1	9
E1T6	1362.01	1402.89	1452.41	4217.3	1405.77	Factor B	8	6.58668e+08	8.23334e+07	1.65891e+11	2.22534	S		2	1423.65	3	5
E1T7	1181.29	1251.84	1393.14	3826.27	1275.42	A*B	8	-6.37402e+08	-7.96753e+07	-1.60535e+11	2.22534	NS		3	1463.73	2	2
E1T8	1279.69	1312.49	1406.88	3999.07	1333.02	Error	34	1.57225e+06	46242.6					4	1291.45	5	7
E1T9	1061.66	1182.71	1221.36	3465.73	1155.24	Total	53	2.51473e+07		t34=	2.03224			5	1298.33	4	3
E2T1	3599.51	3052.84	2415.56	9067.9	3022.63	SE.m	124.154							6	1122.04	8	1
E2T2	1146.01	1195.72	1264.28	3606.02	1202.01	CD	356.822							7	1162.14	6	6
E2T3	1317.26	1544.6	1326.17	4188.04	1396.01	CV	14.9387							8	1126.45	7	4
E2T4	974.45	1233.43	920.433	3128.31	1042.77									9	927.561	9	8
E2T5	985.367	789.302	1002.46	2777.13	925.711									SE.m	87.7901
E2T6	909.908	855.345	749.684	2514.94	838.312								Factor B	CD	252.311
E2T7	1284.55	859	1003.04	3146.59	1048.86
E2T8	885.195	844.332	1030.08	2759.61	919.869
E2T9	743.65	589.256	766.723	2099.63	699.876
Total	25847	26144	25741.4	77732.4	1439.49
Mean	1435.95	1452.44	1430.08
CF	1.11895e+08
TSSQ	2.51473e+07	RSSQ	4841.52
tSSQ	2.35703e+07	ESSQ	1.57225e+06
		green
Main factors	2
Sub factors	9	Total factors	18
Replications	3
Treatments	R1	R2	R3	Total	Mean									Factors Mean
E1T1	204.655	271.731	237.387	713.773	237.924				ANOVA					1	120.229	#N/A
E1T2	114.036	116.876	129.601	360.514	120.171		df	SS	MSS	Cal F	Table F	Result		2	104.415	#N/A
E1T3	124.922	105.797	104.851	335.571	111.857	Replication	2	35.5363	17.7681	35800.5	3.2759	S		SE.m	3.32721
E1T4	112.748	115.593	109.13	337.472	112.491	Treatment	17	138506	8147.41	1.6416e+07	1.93321	S	Factor A	CD	9.56249
E1T5	109.505	122.606	134.026	366.137	122.046	Factor A	1	3376.48	3376.48	6.80317e+06	4.13002	S		1	246.956	#N/A	9
E1T6	99.4806	102.466	106.083	308.031	102.677	Factor B	8	4.03562e+06	504452	1.01641e+09	2.22534	S		2	110.985	#N/A	5
E1T7	86.2813	91.434	101.754	279.47	93.1565	A*B	8	-3.90049e+06	-487561	-9.82372e+08	2.22534	NS		3	115.043	#N/A	2
E1T8	93.4684	95.8642	102.758	292.091	97.3636	Error	34	10162.6	298.899					4	100.402	#N/A	7
E1T9	77.5433	86.3852	89.2079	253.136	84.3788	Total	53	148704		t34=	2.03224			5	100.222	#N/A	3
E2T1	304.844	258.547	204.575	767.966	255.989	SE.m	9.98163							6	86.837	#N/A	1
E2T2	97.0564	101.266	107.073	305.396	101.799	CD	28.6875							7	90.9926	#N/A	6
E2T3	111.56	130.813	112.314	354.687	118.229	CV	15.3921							8	87.6339	#N/A	4
E2T4	82.5267	104.46	77.952	264.939	88.3129									9	71.8259	#N/A	8
E2T5	83.4512	66.8464	84.8993	235.197	78.399									SE.m	7.05808
E2T6	77.0606	72.4397	63.4911	212.991	70.9971								Factor B	CD	20.2851
E2T7	108.789	72.7492	84.9481	266.486	88.8288
E2T8	74.9676	71.5069	87.238	233.713	77.9042
E2T9	62.9802	49.9044	64.9342	177.819	59.2729
Total	2025.88	2037.29	2002.22	6065.39	112.322
Mean	112.549	113.183	111.235
CF	681276
TSSQ	148704	RSSQ	35.5363
tSSQ	138506	ESSQ	10162.6
		grey
Main factors	2
Sub factors	9	Total factors	18
Replications	3
Treatments	R1	R2	R3	Total	Mean									Factors Mean
E1T1	3.00963	3.99604	3.49099	10.4967	3.49889				ANOVA					1	1.76808	#N/A
E1T2	1.677	1.71877	1.9059	5.30167	1.76722		df	SS	MSS	Cal F	Table F	Result		2	1.33865	#N/A
E1T3	1.83709	1.55584	1.54193	4.93486	1.64495	Replication	2	0.00562922	0.00281461	5.67108	3.2759	S		SE.m	0.04475
E1T4	1.65807	1.6999	1.60486	4.96283	1.65428	Treatment	17	27.3212	1.60713	3238.16	1.93321	S	Factor A	CD	0.128613
E1T5	1.61036	1.80303	1.97097	5.38437	1.79479	Factor A	1	2.48955	2.48955	5016.12	4.13002	S		1	3.3904	#N/A	9
E1T6	1.46295	1.50686	1.56005	4.52986	1.50995	Factor B	8	767.349	95.9186	193263	2.22534	S		2	1.53617	#N/A	5
E1T7	1.26884	1.34462	1.49639	4.10985	1.36995	A*B	8	-742.517	-92.8146	-187009	2.22534	NS		3	1.58036	#N/A	2
E1T8	1.37454	1.40977	1.51115	4.29545	1.43182	Error	34	1.83835	0.0540692					4	1.39325	#N/A	7
E1T9	1.14034	1.27037	1.31188	3.72259	1.24086	Total	53	29.1652		t34=	2.03224			5	1.39995	#N/A	3
E2T1	3.90826	3.3147	2.62275	9.84571	3.2819	SE.m	0.13425							6	1.21009	#N/A	1
E2T2	1.24431	1.29829	1.37273	3.91533	1.30511	CD	0.385838							7	1.25439	#N/A	6
E2T3	1.43025	1.67709	1.43992	4.54727	1.51576	CV	14.9693							8	1.21529	#N/A	4
E2T4	1.05803	1.33923	0.999385	3.39665	1.13222									9	1.00039	#N/A	8
E2T5	1.06989	0.857005	1.08845	3.01534	1.00511									SE.m	0.0949291
E2T6	0.987957	0.928714	0.813989	2.73066	0.91022								Factor B	CD	0.272829
E2T7	1.39473	0.932682	1.08908	3.41649	1.13883
E2T8	0.961124	0.916756	1.11844	2.99632	0.998772
E2T9	0.807438	0.6398	0.83249	2.27973	0.759909
Total	27.9008	28.2095	27.7714	83.8816	1.55336
Mean	1.55005	1.56719	1.54285
CF	130.299
TSSQ	29.1652	RSSQ	0.00562922
tSSQ	27.3212	ESSQ	1.83835
		total
Main factors	2
Sub factors	9	Total factors	18
Replications	3
Treatments	R1	R2	R3	Total	Mean									Factors Mean
E1T1	3009.63	3996.04	3490.99	10496.7	3498.89				ANOVA					1	1768.08	#N/A	1
E1T2	1677	1718.77	1905.9	5301.67	1767.22		df	SS	MSS	Cal F	Table F	Result		2	1338.65	#N/A	2
E1T3	1837.09	1555.84	1541.93	4934.86	1644.95	Replication	2	5629.22	2814.61	5.67108e+06	3.2759	S		SE.m	44.75
E1T4	1658.07	1699.9	1604.86	4962.83	1654.28	Treatment	17	2.73212e+07	1.60713e+06	3.23816e+09	1.93321	S	Factor A	CD	128.613
E1T5	1610.36	1803.03	1970.97	5384.37	1794.79	Factor A	1	2.48955e+06	2.48955e+06	5.01612e+09	4.13002	S		1	3390.4	#N/A	9
E1T6	1462.95	1506.86	1560.05	4529.86	1509.95	Factor B	8	7.67349e+08	9.59186e+07	1.93263e+11	2.22534	S		2	1536.17	#N/A	5
E1T7	1268.84	1344.62	1496.39	4109.85	1369.95	A*B	8	-7.42517e+08	-9.28146e+07	-1.87009e+11	2.22534	NS		3	1580.36	#N/A	2
E1T8	1374.54	1409.77	1511.15	4295.45	1431.82	Error	34	1.83835e+06	54069.2					4	1393.25	#N/A	7
E1T9	1140.34	1270.37	1311.88	3722.59	1240.86	Total	53	2.91652e+07		t34=	2.03224			5	1399.95	#N/A	3
E2T1	3908.26	3314.7	2622.75	9845.71	3281.9	SE.m	134.25							6	1210.09	#N/A	1
E2T2	1244.31	1298.29	1372.73	3915.33	1305.11	CD	385.838							7	1254.39	#N/A	6
E2T3	1430.25	1677.09	1439.92	4547.27	1515.76	CV	14.9693							8	1215.29	#N/A	4
E2T4	1058.03	1339.23	999.385	3396.65	1132.22									9	1000.39	#N/A	8
E2T5	1069.89	857.005	1088.45	3015.34	1005.11									SE.m	94.9291
E2T6	987.957	928.714	813.989	2730.66	910.22								Factor B	CD	272.829
E2T7	1394.73	932.682	1089.08	3416.49	1138.83
E2T8	961.124	916.756	1118.44	2996.32	998.772
E2T9	807.438	639.8	832.49	2279.73	759.909
Total	27900.8	28209.5	27771.4	83881.6	1553.36
Mean	1550.05	1567.19	1542.85
CF	1.30299e+08
TSSQ	2.91652e+07	RSSQ	5629.22
tSSQ	2.73212e+07	ESSQ	1.83835e+06

## Sheet: Percolation
		2019
		TMA_V
Main factors	2
Sub factors	9	Total factors	18
Replications	3
Treatments	R1	R2	R3	Total	Mean									Factors Mean
E1T1	4716.98	5296.61	5797.77	15811.4	5270.45				ANOVA					1	2971.89	1
E1T2	3031.09	3095.24	3232.04	9358.37	3119.46		df	SS	MSS	Cal F	Table F	Result		2	2656.34	2
E1T3	3084.83	2843.6	2758.62	8687.06	2895.69	Replication	2	238846	119423	0.778549	3.2759	NS		SE.m	75.3735
E1T4	2761.19	2810.13	2853.47	8424.79	2808.26	Treatment	17	4.73287e+07	2.78404e+06	18.1499	1.93321	S	Factor A	CD	216.626
E1T5	2876.71	2941.18	3017.24	8835.13	2945.04	Factor A	1	1.34421e+06	1.34421e+06	8.76324	4.13002	S		1	5289.13	1	1
E1T6	2505.75	2564.71	2601.43	7671.88	2557.29	Factor B	8	2.29834e+09	2.87292e+08	1872.93	2.22534	S		2	2882.28	2	2
E1T7	2510.92	2415.97	2584.27	7511.15	2503.72	A*B	8	-2.25235e+09	-2.81544e+08	-1835.46	2.22534	NS		3	2859.44	3	3
E1T8	2448.56	2502.1	2598.25	7548.92	2516.31	Error	34	5.21531e+06	153392					4	2631.02	4	4
E1T9	2046.33	2128.51	2217.57	6392.42	2130.81	Total	53	5.27829e+07		t34=	2.03224			5	2626.74	5	5
E2T1	4113.21	6987.18	4823.01	15923.4	5307.8	SE.m	226.121							6	2327.63	8	8
E2T2	2690.22	2757.66	2487.44	7935.31	2645.1	CD	649.877				315.549			7	2417.56	6	6
E2T3	2753.25	2912.09	2804.23	8469.57	2823.19	CV	13.9174							8	2356.51	7	7
E2T4	2427.44	2433.86	2500	7361.3	2453.77									9	1936.75	9	9
E2T5	2376.44	2199.47	2349.43	6925.34	2308.45									SE.m	159.891
E2T6	2151.59	2105.26	2037.04	6293.89	2097.96								Factor B	CD	459.532
E2T7	2630.14	2105.26	2258.82	6994.22	2331.41
E2T8	2133.89	2179.49	2276.79	6590.16	2196.72
E2T9	1794.87	1653.54	1779.66	5228.08	1742.69
Total	49053.4	51931.9	50977.1	151962	2814.12
Mean	2725.19	2885.1	2832.06
CF	4.2764e+08
TSSQ	5.27829e+07	RSSQ	238846
tSSQ	4.73287e+07	ESSQ	5.21531e+06
		Percolation
Main factors	2
Sub factors	9	Total factors	18
Replications	3
Treatments	R1	R2	R3	Total	Mean									Factors Mean
E1T1	1572	1777	1545	4894	1631.33				ANOVA					1	1107.61	2
E1T2	1105	1210.64	1137	3452.64	1150.88		df	SS	MSS	Cal F	Table F	Result		2	1185.98	1
E1T3	1249	1230	1228.55	3707.55	1235.85	Replication	2	1361.78	680.891	0.0044389	3.2759	NS		SE.m	9.03626
E1T4	1083.63	1086.1	1111.54	3281.27	1093.76	Treatment	17	1.77326e+06	104309	0.68002	1.93321	NS	Factor A	CD	25.9705
E1T5	1034	1026	1053.63	3113.63	1037.88	Factor A	1	82927.9	82927.9	0.540629	4.13002	NS		1	1504.19	1	1
E1T6	958	959.717	953	2870.72	956.906	Factor B	8	3.40303e+08	4.25378e+07	277.315	2.22534	S		2	1240.34	2	2
E1T7	1161.59	959.717	1018.78	3140.09	1046.7	A*B	8	-3.38612e+08	-4.23265e+07	-275.938	2.22534	NS		3	1238.09	3	3
E1T8	970.727	988.264	1025.69	2984.68	994.893	Error	34	74958.4	2204.66					4	1151.85	4	4
E1T9	840.335	785.978	834.485	2460.8	820.266	Total	53	1.84958e+06		t34=	2.03224			5	1150.18	5	5
E2T1	1364	1387.16	1380	4131.16	1377.05	SE.m	27.1088							6	1035.36	8	8
E2T2	1295.8	1320.48	1373.09	3989.37	1329.79	CD	77.9114							7	1069.88	6	6
E2T3	1216	1274	1231	3721	1240.33	CV	4.09435							8	1046.35	7	7
E2T4	1202	1210.82	1217	3629.82	1209.94									9	884.904	9	9
E2T5	1246	1251	1290.48	3787.48	1262.49									SE.m	19.1688
E2T6	1114	1116.43	1111	3341.43	1113.81								Factor B	CD	55.0917
E2T7	1116	1059.22	1104	3279.22	1093.07
E2T8	1071.75	1092.35	1129.33	3293.43	1097.81
E2T9	917.051	948.659	982.913	2848.62	949.541
Total	20516.9	20683.5	20726.5	61926.9	1146.79
Mean	1139.83	1149.08	1151.47
CF	7.10174e+07
TSSQ	1.84958e+06	RSSQ	1361.78
tSSQ	1.77326e+06	ESSQ	74958.4
		2020
		TMA_V
Main factors	2
Sub factors	9	Total factors	18
Replications	3
Treatments	R1	R2	R3	Total	Mean									Factors Mean
E1T1	4766.04	5793.58	5360.78	15920.4	5306.8				ANOVA					1	2967.53	1
E1T2	3000	3053.98	3228.26	9282.25	3094.08		df	SS	MSS	Cal F	Table F	Result		2	2579.31	2
E1T3	3063.7	2779.82	2723.6	8567.11	2855.7	Replication	2	2259.79	1129.89	0.00736608	3.2759	NS		SE.m	47.5564
E1T4	2859.3	2888.32	2789.22	8536.84	2845.61	Treatment	17	4.20627e+07	2.47428e+06	16.1304	1.93321	S	Factor A	CD	136.678
E1T5	2724.05	2923.91	3118.84	8766.8	2922.27	Factor A	1	2.03458e+06	2.03458e+06	13.2639	4.13002	S		1	5068.54	1	1
E1T6	2506.73	2552.51	2612.15	7671.39	2557.13	Factor B	8	2.20274e+09	2.75343e+08	1795.03	2.22534	S		2	2891.45	2	2
E1T7	2511.83	2388.55	2561.4	7461.78	2487.26	A*B	8	-2.16271e+09	-2.70339e+08	-1762.41	2.22534	NS		3	2828.9	3	3
E1T8	2434.34	2479.42	2591.4	7505.17	2501.72	Error	34	2.07616e+06	61063.4					4	2608.52	5	4
E1T9	2060.84	2133.86	2216.77	6411.46	2137.15	Total	53	4.41411e+07		t34=	2.03224			5	2618.73	4	5
E2T1	5472.64	4867.26	4150.94	14490.8	4830.28	SE.m	142.669							6	2304.68	8	8
E2T2	2601.56	2642.86	2822.03	8066.45	2688.82	CD	410.035							7	2384.38	6	6
E2T3	2675.88	3034.19	2696.2	8406.27	2802.09	CV	8.90995							8	2321.51	7	7
E2T4	2291.36	2592.18	2230.77	7114.31	2371.44									9	1934.06	9	9
E2T5	2351.12	2168.39	2426.09	6945.6	2315.2									SE.m	100.882
E2T6	2130.12	2075.12	1951.43	6156.67	2052.22								Factor B	CD	289.939
E2T7	2581.33	2037.89	2225.29	6844.52	2281.51
E2T8	2079.67	2056.57	2287.64	6423.88	2141.29
E2T9	1802.11	1600	1790.79	5192.9	1730.97
Total	49912.6	50068.4	49783.6	149765	2773.42
Mean	2772.92	2781.58	2765.76
CF	4.1536e+08
TSSQ	4.41411e+07	RSSQ	2259.79
tSSQ	4.20627e+07	ESSQ	2.07616e+06
		Percolation
Main factors	2
Sub factors	9	Total factors	18
Replications	3
Treatments	R1	R2	R3	Total	Mean									Factors Mean
E1T1	1561	1560	1650	4771	1590.33				ANOVA					1	1077.78	2
E1T2	1200	1210	1190	3600	1200		df	SS	MSS	Cal F	Table F	Result		2	1153.3	1
E1T3	1101	1110	1070	3281	1093.67	Replication	2	1002.93	501.463	0.00326917	3.2759	NS		SE.m	7.26731
E1T4	1084	1070	1070	3224	1074.67	Treatment	17	1.67855e+06	98738.3	0.643701	1.93321	NS	Factor A	CD	20.8865
E1T5	1002	1001	1020	3023	1007.67	Factor A	1	76991.1	76991.1	0.501925	4.13002	NS		1	1470.33	1	1
E1T6	941	941	945	2827	942.333	Factor B	8	3.22132e+08	4.02665e+07	262.508	2.22534	S		2	1248.83	2	2
E1T7	1140	946	960	3046	1015.33	A*B	8	-3.20531e+08	-4.00663e+07	-261.203	2.22534	NS		3	1145.17	3	3
E1T8	960	968	974	2902	967.333	Error	34	48483.1	1425.97					4	1119	5	4
E1T9	836	776	814	2426	808.667	Total	53	1.72804e+06		t34=	2.03224			5	1121.83	4	5
E2T1	1340	1353	1358	4051	1350.33	SE.m	21.8019							6	1009.33	8	8
E2T2	1274	1260	1359	3893	1297.67	CD	62.6594							7	1042.5	6	6
E2T3	1160	1260	1170	3590	1196.67	CV	3.3851							8	1020.67	7	7
E2T4	1160	1170	1160	3490	1163.33									9	862.167	9	9
E2T5	1206	1242	1260	3708	1236									SE.m	15.4163
E2T6	1074	1080	1075	3229	1076.33								Factor B	CD	44.3069
E2T7	1104	1040	1065	3209	1069.67
E2T8	1052	1074	1096	3222	1074
E2T9	937	909	901	2747	915.667
Total	20132	19970	20137	60239	1115.54
Mean	1118.44	1109.44	1118.72
CF	6.71988e+07
TSSQ	1.72804e+06	RSSQ	1002.93
tSSQ	1.67855e+06	ESSQ	48483.1

## Sheet: wp
		2019
		total
Main factors	2
Sub factors	9	Total factors	18
Replications	3
Treatments	R1	R2	R3	Total	Mean									Factors Mean
E1T1	0.212	0.1888	0.17248	0.57328	0.191093				ANOVA					1	0.356905	2		Treatments	R1	R2	R3
E1T2	0.324167	0.351667	0.3625	1.03833	0.346111		df	SS	MSS	Cal F	Table F	Result		2	0.41245	1		E1T1	21.2	18.88	17.248			Nutrient applied
E1T3	0.408403	0.399664	0.384874	1.19294	0.397647	Replication	2	0.000348053	0.000174027	0.350641	3.2759	NS		SE.m	0.00428741			E1T2	32.4167	35.1667	36.25		N1	0			0.0747778
E1T4	0.329915	0.323077	0.309402	0.962393	0.320798	Treatment	17	0.432735	0.025455	51.2885	1.93321	S	Factor A	CD	0.0123221			E1T3	40.8403	39.9664	38.4874		N2	150
E1T5	0.398261	0.413913	0.386957	1.19913	0.39971	Factor A	1	0.0416509	0.0416509	83.9211	4.13002	S		1	0.194476	9	1	E1T4	32.9915	32.3077	30.9402		N3	187.5
E1T6	0.488679	0.469811	0.450943	1.40943	0.469811	Factor B	8	37.7246	4.71557	9501.26	2.22534	S		2	0.350257	7	2	E1T5	39.8261	41.3913	38.6957		N4	71.6
E1T7	0.362162	0.355856	0.35045	1.06847	0.356156	A*B	8	-37.3335	-4.66668	-9402.76	2.22534	NS		3	0.426601	3	3	E1T6	48.8679	46.9811	45.0943		N5	150
E1T8	0.399083	0.389908	0.384404	1.17339	0.391131	Error	34	0.0168745	0.00049631					4	0.349793	8	4	E1T7	36.2162	35.5856	35.045		N6	170
E1T9	0.347619	0.34	0.331429	1.01905	0.339683	Total	53	0.449958		t34=	2.03224			5	0.416175	4	5	E1T8	39.9083	38.9908	38.4404		N7	112.5
E2T1	0.243119	0.143119	0.207339	0.593578	0.197859	SE.m	0.0128622							6	0.522207	1	8	E1T9	34.7619	34	33.1429		N8	132.5
E2T2	0.363208	0.343396	0.356604	1.06321	0.354403	CD	0.0369664							7	0.381882	6	6	E2T1	24.3119	14.3119	20.7339		N9	20
E2T3	0.468627	0.458824	0.439216	1.36667	0.455556	CV	5.79136							8	0.434013	2	7	E2T2	36.3208	34.3396	35.6604
E2T4	0.371717	0.362626	0.40202	1.13636	0.378788									9	0.386689	5	9	E2T3	46.8627	45.8824	43.9216
E2T5	0.380208	0.475	0.442708	1.29792	0.432639									SE.m	0.00909496			E2T4	37.1717	36.2626	40.202
E2T6	0.557143	0.604762	0.561905	1.72381	0.574603								Factor B	CD	0.0261392			E2T5	38.0208	47.5	44.2708
E2T7	0.411957	0.41087	0.4	1.22283	0.407609													E2T6	55.7143	60.4762	56.1905
E2T8	0.464773	0.475	0.490909	1.43068	0.476894													E2T7	41.1957	41.087	40
E2T9	0.420798	0.454655	0.425635	1.30109	0.433696													E2T8	46.4773	47.5	49.0909
Total	6.95184	6.96095	6.85977	20.7726	0.384677													E2T9	42.0798	45.4655	42.5635
Mean	0.386213	0.386719	0.381099
CF	7.99073
TSSQ	0.449958	RSSQ	0.000348053
tSSQ	0.432735	ESSQ	0.0168745
		2019
		WP Irri
Main factors	2
Sub factors	9	Total factors	18
Replications	3
Treatments	R1	R2	R3	Total	Mean									Factors Mean
E1T1	0.222457	0.198113	0.180988	0.601558	0.200519				ANOVA					1	0.376492	2
E1T2	0.340857	0.369773	0.381164	1.09179	0.363932		df	SS	MSS	Cal F	Table F	Result		2	0.440266	1
E1T3	0.429617	0.420424	0.404865	1.25491	0.418302	Replication	2	0.000389681	0.00019484	0.392578	3.2759	NS		SE.m	0.00455138
E1T4	0.34736	0.340161	0.325762	1.01328	0.337761	Treatment	17	0.508642	0.0299201	60.2851	1.93321	S	Factor A	CD	0.0130808
E1T5	0.419706	0.436201	0.407793	1.2637	0.421233	Factor A	1	0.0549062	0.0549062	110.629	4.13002	S		1	0.204826	9	9
E1T6	0.517358	0.497383	0.477408	1.49215	0.497383	Factor B	8	42.512	5.314	10707	2.22534	S		2	0.369567	8	5
E1T7	0.382406	0.375747	0.370039	1.12819	0.376064	A*B	8	-42.0583	-5.25729	-10592.7	2.22534	NS		3	0.450853	3	2
E1T8	0.421822	0.412125	0.406307	1.24025	0.413418	Error	34	0.0190165	0.000559308					4	0.370225	7	7
E1T9	0.368226	0.360155	0.351075	1.07946	0.359819	Total	53	0.528048		t34=	2.03224			5	0.44104	4	3
E2T1	0.256972	0.151274	0.219154	0.6274	0.209133	SE.m	0.0136542							6	0.557602	1	1
E2T2	0.384523	0.363549	0.377532	1.1256	0.375201	CD	0.0392424							7	0.405741	6	6
E2T3	0.497274	0.486871	0.466065	1.45021	0.483403	CV	5.79111							8	0.462217	2	4
E2T4	0.395172	0.385507	0.427387	1.20807	0.402689									9	0.413343	5	8
E2T5	0.404998	0.50597	0.471573	1.38254	0.460847									SE.m	0.00965494
E2T6	0.599048	0.650248	0.604168	1.85346	0.617821								Factor B	CD	0.0277486
E2T7	0.440063	0.438902	0.427291	1.30626	0.435419
E2T8	0.498027	0.508986	0.526034	1.53305	0.511016
E2T9	0.452983	0.48943	0.45819	1.4006	0.466868
Total	7.37887	7.39082	7.28279	22.0525	0.408379
Mean	0.409937	0.410601	0.4046
CF	9.00578
TSSQ	0.528048	RSSQ	0.000389681
tSSQ	0.508642	ESSQ	0.0190165
		2019
		WP E
Main factors	2
Sub factors	9	Total factors	18
Replications	3
Treatments	R1	R2	R3	Total	Mean									Factors Mean
E1T1	0.215332	0.192138	0.175824	0.583293	0.194431				ANOVA					1	0.360583	#N/A
E1T2	0.327559	0.355425	0.366548	1.04953	0.349844		df	SS	MSS	Cal F	Table F	Result		2	0.415992	#N/A
E1T3	0.412791	0.403618	0.388567	1.20498	0.401659	Replication	2	0.000349374	0.000174687	0.351972	3.2759	NS		SE.m	0.00430805
E1T4	0.333138	0.32629	0.312527	0.971955	0.323985	Treatment	17	0.435179	0.0255988	51.5782	1.93321	S	Factor A	CD	0.0123814
E1T5	0.402388	0.418299	0.391164	1.21185	0.40395	Factor A	1	0.0414468	0.0414468	83.51	4.13002	S		1	0.198064	#N/A	1
E1T6	0.493462	0.474519	0.455527	1.42351	0.474502	Factor B	8	38.4258	4.80323	9677.88	2.22534	S		2	0.353549	#N/A	2
E1T7	0.365553	0.35906	0.353828	1.07844	0.35948	A*B	8	-38.0321	-4.75401	-9578.72	2.22534	NS		3	0.430642	#N/A	3
E1T8	0.402792	0.393613	0.388198	1.1846	0.394868	Error	34	0.0170374	0.0005011					4	0.352901	#N/A	4
E1T9	0.350419	0.34285	0.334324	1.02759	0.342531	Total	53	0.452566		t34=	2.03224			5	0.419968	#N/A	5
E2T1	0.24694	0.146982	0.21117	0.605093	0.201698	SE.m	0.0129241							6	0.526868	#N/A	8
E2T2	0.366181	0.346279	0.359302	1.07176	0.357254	CD	0.0371443							7	0.385211	#N/A	6
E2T3	0.472711	0.463054	0.443114	1.37888	0.459626	CV	5.76512							8	0.437802	#N/A	7
E2T4	0.374657	0.365502	0.405295	1.14545	0.381818									9	0.389584	#N/A	9
E2T5	0.383244	0.478508	0.446203	1.30796	0.435985									SE.m	0.00913875
E2T6	0.561747	0.609651	0.566299	1.7377	0.579233								Factor B	CD	0.026265
E2T7	0.41576	0.4139	0.403168	1.23283	0.410943
E2T8	0.468407	0.478795	0.495007	1.44221	0.480736
E2T9	0.423741	0.457583	0.428586	1.30991	0.436637
Total	7.01682	7.02607	6.92465	20.9675	0.388288
Mean	0.389823	0.390337	0.384703
CF	8.14144
TSSQ	0.452566	RSSQ	0.000349374
tSSQ	0.435179	ESSQ	0.0170374
		2020
		wp Total
Main factors	2
Sub factors	9	Total factors	18
Replications	3
Treatments	R1	R2	R3	Total	Mean									Factors Mean
E1T1	0.209818	0.172605	0.18654	0.568963	0.189654				ANOVA					1	0.357879	#N/A
E1T2	0.326403	0.359736	0.367162	1.0533	0.3511		df	SS	MSS	Cal F	Table F	Result		2	0.419384	#N/A
E1T3	0.410788	0.40332	0.385892	1.2	0.4	Replication	2	0.000562996	0.000281498	0.567182	3.2759	NS		SE.m	0.00488504
E1T4	0.333333	0.327441	0.309764	0.970539	0.323513	Treatment	17	0.441685	0.0259815	52.3493	1.93321	S	Factor A	CD	0.0140397
E1T5	0.398116	0.418664	0.390411	1.20719	0.402397	Factor A	1	0.0510695	0.0510695	102.898	4.13002	S		1	0.199676	#N/A	9
E1T6	0.48524	0.468635	0.451107	1.40498	0.468327	Factor B	8	38.5153	4.81442	9700.42	2.22534	S		2	0.35458	#N/A	5
E1T7	0.349736	0.346221	0.358524	1.05448	0.351494	A*B	8	-38.1247	-4.76559	-9602.04	2.22534	NS		3	0.434037	#N/A	2
E1T8	0.398927	0.391771	0.382826	1.17352	0.391175	Error	34	0.0219068	0.000644316					4	0.347943	#N/A	7
E1T9	0.3671	0.342007	0.320632	1.02974	0.343247	Total	53	0.464155		t34=	2.03224			5	0.422445	#N/A	3
E2T1	0.182727	0.205455	0.240909	0.629091	0.209697	SE.m	0.0146551							6	0.523883	#N/A	1
E2T2	0.373709	0.329577	0.370892	1.07418	0.358059	CD	0.0421192							7	0.387493	#N/A	6
E2T3	0.480845	0.486248	0.437132	1.40422	0.468075	CV	6.53148							8	0.439554	#N/A	4
E2T4	0.384384	0.378378	0.354354	1.11712	0.372372									9	0.388071	#N/A	8
E2T5	0.387397	0.490702	0.44938	1.32748	0.442493									SE.m	0.0103627
E2T6	0.554907	0.625	0.558411	1.73832	0.579439								Factor B	CD	0.0297828
E2T7	0.436422	0.385776	0.448276	1.27047	0.423491
E2T8	0.469457	0.4819	0.512443	1.4638	0.487934
E2T9	0.425329	0.461171	0.412186	1.29869	0.432895
Total	6.97464	7.07461	6.93684	20.9861	0.388631
Mean	0.38748	0.393034	0.38538
CF	8.15585
TSSQ	0.464155	RSSQ	0.000562996
tSSQ	0.441685	ESSQ	0.0219068
		wp irri
Main factors	2
Sub factors	9	Total factors	18
Replications	3
Treatments	R1	R2	R3	Total	Mean									Factors Mean
E1T1	0.216147	0.177811	0.192167	0.586124	0.195375				ANOVA					1	0.36976
E1T2	0.336675	0.371058	0.378717	1.08645	0.36215		df	SS	MSS	Cal F	Table F	Result		2	0.43658
E1T3	0.423794	0.416089	0.39811	1.23799	0.412664	Replication	2	0.000612348	0.000306174	0.6169	3.2759	NS		SE.m	0.00507554
E1T4	0.344043	0.337961	0.319716	1.00172	0.333907	Treatment	17	0.487823	0.0286955	57.8177	1.93321	S	Factor A	CD	0.0145872
E1T5	0.411133	0.432353	0.403176	1.24666	0.415554	Factor A	1	0.0602763	0.0602763	121.449	4.13002	S		1	0.206183
E1T6	0.502378	0.485187	0.46704	1.4546	0.484868	Factor B	8	41.4478	5.18098	10439	2.22534	S		2	0.366545
E1T7	0.361483	0.35785	0.370565	1.0899	0.363299	A*B	8	-41.0203	-5.12753	-10331.3	2.22534	NS		3	0.449192
E1T8	0.412573	0.405173	0.395922	1.21367	0.404556	Error	34	0.0236487	0.00069555					4	0.360297
E1T9	0.380166	0.35418	0.332044	1.06639	0.355463	Total	53	0.512084		t34=	2.03224			5	0.437811
E2T1	0.189084	0.212602	0.24929	0.650976	0.216992	SE.m	0.0152266							6	0.545235
E2T2	0.387152	0.341433	0.384234	1.11282	0.37094	CD	0.0437617							7	0.402184
E2T3	0.49897	0.504577	0.45361	1.45716	0.485719	CV	6.54149							8	0.456896
E2T4	0.39916	0.392923	0.367976	1.16006	0.386686									9	0.404184
E2T5	0.402784	0.510193	0.467229	1.38021	0.460069									SE.m	0.0107669
E2T6	0.579961	0.65322	0.583624	1.81681	0.605602								Factor B	CD	0.0309442
E2T7	0.454535	0.401787	0.466881	1.3232	0.441068
E2T8	0.489953	0.50294	0.534816	1.52771	0.509236
E2T9	0.444989	0.482488	0.431239	1.35872	0.452905
Total	7.23498	7.33982	7.19636	21.7712	0.40317
Mean	0.401943	0.407768	0.399798
CF	8.77747
TSSQ	0.512084	RSSQ	0.000612348
tSSQ	0.487823	ESSQ	0.0236487
		WP E
Main factors	2
Sub factors	9	Total factors	18
Replications	3
Treatments	R1	R2	R3	Total	Mean									Factors Mean
E1T1	0.213115	0.175913	0.189844	0.578872	0.192957				ANOVA					1	0.361455
E1T2	0.329821	0.363151	0.370576	1.06355	0.354516		df	SS	MSS	Cal F	Table F	Result		2	0.422861
E1T3	0.414219	0.406751	0.389325	1.2103	0.403432	Replication	2	0.000563011	0.000281506	0.567197	3.2759	NS		SE.m	0.00488456
E1T4	0.336821	0.330929	0.313254	0.981004	0.327001	Treatment	17	0.44203	0.0260018	52.3902	1.93321	S	Factor A	CD	0.0140384
E1T5	0.401658	0.422204	0.393953	1.21782	0.405938	Factor A	1	0.0509049	0.0509049	102.567	4.13002	S		1	0.203225
E1T6	0.489052	0.472448	0.454921	1.41642	0.47214	Factor B	8	39.1717	4.89646	9865.73	2.22534	S		2	0.357803
E1T7	0.353377	0.349862	0.362163	1.0654	0.355134	A*B	8	-38.7806	-4.84757	-9767.22	2.22534	NS		3	0.437336
E1T8	0.402628	0.395473	0.386529	1.18463	0.394877	Error	34	0.0219025	0.000644192					4	0.351302
E1T9	0.370951	0.345861	0.324488	1.0413	0.3471	Total	53	0.464496		t34=	2.03224			5	0.425881
E2T1	0.186532	0.209251	0.244695	0.640478	0.213493	SE.m	0.0146537							6	0.527671
E2T2	0.376738	0.33261	0.373921	1.08327	0.36109	CD	0.0421151							7	0.391051
E2T3	0.484009	0.489411	0.440298	1.41372	0.471239	CV	6.47212							8	0.443229
E2T4	0.387615	0.381609	0.357587	1.12681	0.375603									9	0.391926
E2T5	0.390731	0.494031	0.45271	1.33747	0.445824									SE.m	0.0103617
E2T6	0.55867	0.628761	0.562175	1.74961	0.583202								Factor B	CD	0.0297799
E2T7	0.439898	0.389255	0.451751	1.2809	0.426968
E2T8	0.473105	0.485548	0.516089	1.47474	0.491581
E2T9	0.429186	0.465026	0.416045	1.31026	0.436753
Total	7.03813	7.13809	7.00033	21.1765	0.392158
Mean	0.391007	0.396561	0.388907
CF	8.30456
TSSQ	0.464496	RSSQ	0.000563011
tSSQ	0.44203	ESSQ	0.0219025
