# Supplementary material for: Conservation tillage and fertiliser management strategies impact on basmati rice (Oryza sativa L): crop performance, crop water productivity, nutrient uptake and fertility status of the soil under rice-wheat cropping system
Source: PeerJ. 2023 Nov 1;11:e16271. doi: 10.7717/peerj.16271 (PMC10625351; doi:10.7717/peerj.16271)
Supplement: Supplemental Information 5 [file peerj-11-16271-s005.xlsx]

## Sheet: NPK UPTAKES (kg ha-1)
	Maize N, K & Bio fertigation - yield attributes- 2018-19
N UPTAKE AT 30 DAS (kg ha-1)
Treatments	R1	R2	R3	Total	Mean			ANOVA					Factors Mean
T1- 100%RDF-M0	19.4333	13.0787	11.4849	43.997	14.6657								1	13.0869
T2- 100%RDF-SM	12.494	9.02156	16.2609	37.7765	12.5922		df	SS	MSS	Cal F	Table F		0.75	13.0033
T3-100%RDF-FM3	14.2803	12.9121	14.4317	41.6241	13.8747	Replication	2	20.2119	10.106	0.599038	3.73889	ns	SE.m	1.18569
T4-100%RDF-FM5	10.8509	12.1975	10.5966	33.645	11.215	Treatment	7	42.8499	6.12141	0.362851	2.7642	ns	CD	3.59642
T5- 75%RDF-M0	10	17.1477	12.4077	39.5554	13.1851	RDF	1	0.0419262	0.0419262	0.00248521	4.60011	ns	MC0	13.9254
T6- 75%RDF-SM	10.5127	8.5761	13.1092	32.198	10.7327	MC	3	21.1521	7.05069	0.417935	3.34389	ns	SMC	11.6624
T7-75%RDF-FM3	9.77914	22.8983	9.05709	41.7345	13.9115	RDFxMC	3	21.6559	7.21862	0.427889	3.34389	ns	MC3	13.8931
T8-75%RDF-FM5	12.2622	18.8989	11.3904	42.5515	14.1838	Error	14	236.185	16.8703				MC5	12.6994
Total	99.6126	114.731	98.7385	313.082	13.0451	Total	23	299.246		t14=	2.14479		SE.m	1.67682
Mean	12.4516	14.3414	12.3423			SE.m	2.37138						CD	5.0861
CF	4084.18					CD	7.19284
TSSQ	299.246	RSSQ	20.2119			CV	31.4858
tSSQ	42.8499	ESSQ	236.185
N UPTAKE AT 60 DAS (kg ha-1)
Treatments	R1	R2	R3	Total	Mean			ANOVA					Factors Mean
T1- 100%RDF-M0	142.353	208.457	229.205	580.015	193.338								1	194.745
T2- 100%RDF-SM	126.377	181.688	231.024	539.089	179.696		df	SS	MSS	Cal F	Table F		0.75	162.821
T3-100%RDF-FM3	163.692	185.281	240.187	589.159	196.386	Replication	2	33453.6	16726.8	22.5281	3.73889	sig	SE.m	7.86599
T4-100%RDF-FM5	187.879	217.454	223.338	628.672	209.557	Treatment	7	28143.5	4020.5	5.41492	2.7642	sig	CD	23.859
T5- 75%RDF-M0	0	157.14	151.278	308.418	102.806	RDF	1	6114.71	6114.71	8.23545	4.60011	sig	MC0	148.072
T6- 75%RDF-SM	133.33	125.904	187.052	446.286	148.762	MC	3	14252.8	4750.95	6.3987	3.34389	sig	SMC	164.229
T7-75%RDF-FM3	128.827	212.218	218.872	559.917	186.639	RDFxMC	3	7775.95	2591.98	3.49095	3.34389	sig	MC3	191.513
T8-75%RDF-FM5	147.94	224.172	267.119	639.23	213.077	Error	14	10394.8	742.486				MC5	211.317
Total	1030.4	1512.31	1748.07	4290.79	178.783	Total	23	71991.9		t14=	2.14479		SE.m	11.1242
Mean	128.8	189.039	218.509			SE.m	15.732						CD	33.7418
CF	767118					CD	47.7181
TSSQ	71991.9	RSSQ	33453.6			CV	15.2412
tSSQ	28143.5	ESSQ	10394.8
N UPTAKE AT 90 DAS (kg ha-1)
Treatments	R1	R2	R3	Total	Mean			ANOVA					Factors Mean
T1- 100%RDF-M0	328.859	252.279	258.27	839.407	279.802								1	328.585
T2- 100%RDF-SM	298.986	297.732	354.776	951.495	317.165		df	SS	MSS	Cal F	Table F		0.75	329.05
T3-100%RDF-FM3	360.178	316.661	360.359	1037.2	345.733	Replication	2	-1.10943e+06	-554713	-6.00649	3.73889	ns	SE.m	87.727
T4-100%RDF-FM5	394.787	309.165	410.968	1114.92	371.64	Treatment	7	43086.1	6155.15	0.0666486	2.7642	ns	CD	266.092
T5- 75%RDF-M0	0	267.259	477.089	744.348	248.116	RDF	1	1.29579	1.29579	1.4031e-05	4.60011	ns	MC0	263.959
T6- 75%RDF-SM	292.686	367.866	369.949	1030.5	343.5	MC	3	40385	13461.7	0.145764	3.34389	ns	SMC	330.333
T7-75%RDF-FM3	248.832	286.789	493.761	1029.38	343.127	RDFxMC	3	2699.79	899.931	0.00974455	3.34389	ns	MC3	344.43
T8-75%RDF-FM5	360.254	483.815	300.299	1144.37	381.456	Error	14	1.29293e+06	92352.2				MC5	376.548
Total	2284.58	2581.57		7891.62	328.817	Total	23	226591		t14=	2.14479		SE.m	124.065
Mean	285.573	322.696	#VALUE!			SE.m	175.454						CD	376.311
CF	2.5949e+06					CD	532.184
TSSQ	226591	RSSQ	-1.10943e+06			CV	92.4206
tSSQ	43086.1	ESSQ	1.29293e+06
N UPTAKE IN STRAW AT HARVEST (kg ha-1)
Treatments	R1	R2	R3	Total	Mean			ANOVA					Factors Mean
T1- 100%RDF-M0	123.62	167.721	146.78	438.121	146.04								1	147.071
T2- 100%RDF-SM	110.381	104.808	95.7596	310.949	103.65		df	SS	MSS	Cal F	Table F		0.75	127.435
T3-100%RDF-FM3	180.991	224.725	93.5838	499.3	166.433	Replication	2	4854.14	2427.07	1.23856	3.73889	ns	SE.m	12.7789
T4-100%RDF-FM5	196.261	182.318	137.899	516.478	172.159	Treatment	7	37505.4	5357.92	2.73419	2.7642	ns	CD	38.7607
T5- 75%RDF-M0	0	153.531	106.337	259.868	86.6225	RDF	1	2313.43	2313.43	1.18057	4.60011	ns	MC0	116.331
T6- 75%RDF-SM	76.9647	95.8343	107.758	280.557	93.519	MC	3	27813.2	9271.08	4.73111	3.34389	sig	SMC	98.5843
T7-75%RDF-FM3	111.682	112.803	149.315	373.8	124.6	RDFxMC	3	7378.77	2459.59	1.25515	3.34389	ns	MC3	145.517
T8-75%RDF-FM5	259.576	210.839	144.576	614.991	204.997	Error	14	27434.4	1959.6				MC5	188.578
Total	1059.48	1252.58	982.008	3294.06	137.253	Total	23	69793.9		t14=	2.14479		SE.m	18.0721
Mean	132.434	156.572	122.751			SE.m	25.5578						CD	54.8159
CF	452119					CD	77.5214
TSSQ	69793.9	RSSQ	4854.14			CV	32.2525
tSSQ	37505.4	ESSQ	27434.4
N UPTAKE IN GRAIN AT HARVEST (kg ha-1)
Treatments	R1	R2	R3	Total	Mean			ANOVA					Factors Mean
T1- 100%RDF-M0				0	0								1	0
T2- 100%RDF-SM				0	0		df	SS	MSS	Cal F	Table F		0.75	0
T3-100%RDF-FM3				0	0	Replication	2	0	0	#DIV/0!	3.73889	#DIV/0!	SE.m	0
T4-100%RDF-FM5				0	0	Treatment	7	0	0	#DIV/0!	2.7642	#DIV/0!	CD	0
T5- 75%RDF-M0				0	0	RDF	1	0	0	#DIV/0!	4.60011	#DIV/0!	MC0	0
T6- 75%RDF-SM				0	0	MC	3	0	0	#DIV/0!	3.34389	#DIV/0!	SMC	0
T7-75%RDF-FM3				0	0	RDFxMC	3	0	0	#DIV/0!	3.34389	#DIV/0!	MC3	0
T8-75%RDF-FM5				0	0	Error	14	0	0				MC5	0
Total	0	0	0	0	#DIV/0!	Total	23	0		t14=	2.14479		SE.m	0
Mean	0	0	0			SE.m	0						CD	0
CF	0					CD	0
TSSQ	0	RSSQ	0			CV	#DIV/0!
tSSQ	0	ESSQ	0
TOTAL N UPTAKE AT HARVEST (kg ha-1)
Treatments	R1	R2	R3	Total	Mean			ANOVA					Factors Mean
T1- 100%RDF-M0	123.62	167.721	146.78	438.121	146.04								1	147.071
T2- 100%RDF-SM	110.381	104.808	95.7596	310.949	103.65		df	SS	MSS	Cal F	Table F		0.75	127.435
T3-100%RDF-FM3	180.991	224.725	93.5838	499.3	166.433	Replication	2	4854.14	2427.07	1.23856	3.73889	ns	SE.m	12.7789
T4-100%RDF-FM5	196.261	182.318	137.899	516.478	172.159	Treatment	7	37505.4	5357.92	2.73419	2.7642	ns	CD	38.7607
T5- 75%RDF-M0	0	153.531	106.337	259.868	86.6225	RDF	1	2313.43	2313.43	1.18057	4.60011	ns	MC0	116.331
T6- 75%RDF-SM	76.9647	95.8343	107.758	280.557	93.519	MC	3	27813.2	9271.08	4.73111	3.34389	sig	SMC	98.5843
T7-75%RDF-FM3	111.682	112.803	149.315	373.8	124.6	RDFxMC	3	7378.77	2459.59	1.25515	3.34389	ns	MC3	145.517
T8-75%RDF-FM5	259.576	210.839	144.576	614.991	204.997	Error	14	27434.4	1959.6				MC5	188.578
Total	1059.48	1252.58	982.008	3294.06	137.253	Total	23	69793.9		t14=	2.14479		SE.m	18.0721
Mean	132.434	156.572	122.751			SE.m	25.5578						CD	54.8159
CF	452119					CD	77.5214
TSSQ	69793.9	RSSQ	4854.14			CV	32.2525
tSSQ	37505.4	ESSQ	27434.4
P UPTAKE AT 30 DAS (kg ha-1)
Treatments	R1	R2	R3	Total	Mean			ANOVA					Factors Mean
T1- 100%RDF-M0	3.98543	2.09646	2.05587	8.13776	2.71259								1	2.34909
T2- 100%RDF-SM	2.36872	1.84264	2.89631	7.10767	2.36922		df	SS	MSS	Cal F	Table F		0.75	1.9442
T3-100%RDF-FM3	2.58362	2.09345	2.56666	7.24372	2.41457	Replication	2	0.42108	0.21054	0.301685	3.73889	ns	SE.m	0.241157
T4-100%RDF-FM5	2.03793	2.04999	1.61205	5.69998	1.89999	Treatment	7	3.57083	0.510119	0.730955	2.7642	ns	CD	0.731474
T5- 75%RDF-M0	0	2.76305	1.58666	4.34971	1.4499	RDF	1	0.983636	0.983636	1.40946	4.60011	ns	MC0	2.08125
T6- 75%RDF-SM	2.55921	1.36345	1.47438	5.39704	1.79901	MC	3	0.124145	0.0413817	0.0592962	3.34389	ns	SMC	2.08412
T7-75%RDF-FM3	1.50007	3.1843	1.61445	6.29882	2.09961	RDFxMC	3	2.46305	0.821018	1.17645	3.34389	ns	MC3	2.25709
T8-75%RDF-FM5	2.643	2.7494	1.89242	7.28482	2.42827	Error	14	9.77033	0.69788				MC5	2.16413
Total	17.678	18.1427	15.6988	51.5195	2.14665	Total	23	13.7622		t14=	2.14479		SE.m	0.341048
Mean	2.20975	2.26784	1.96235			SE.m	0.482314						CD	1.03446
CF	110.594					CD	1.46295
TSSQ	13.7622	RSSQ	0.42108			CV	38.9162
tSSQ	3.57083	ESSQ	9.77033
P UPTAKE AT 60 DAS (kg ha-1)
Treatments	R1	R2	R3	Total	Mean			ANOVA					Factors Mean
T1- 100%RDF-M0	21.7499	27.7715	30.8175	80.3389	26.7796								1	27.696
T2- 100%RDF-SM	19.3676	27.1028	35.1793	81.6497	27.2166		df	SS	MSS	Cal F	Table F		0.75	22.5437
T3-100%RDF-FM3	18.6517	27.5808	29.7793	76.0118	25.3373	Replication	2	705.005	352.503	12.0997	3.73889	sig	SE.m	1.55813
T4-100%RDF-FM5	23.294	40.394	30.6631	94.3511	31.4504	Treatment	7	388.166	55.4523	1.9034	2.7642	ns	CD	4.7261
T5- 75%RDF-M0	0	26.6724	26.9999	53.6723	17.8908	RDF	1	159.273	159.273	5.46705	4.60011	sig	MC0	22.3352
T6- 75%RDF-SM	20.8166	19.1744	20.447	60.438	20.146	MC	3	169.055	56.3516	1.93427	3.34389	ns	SMC	23.6813
T7-75%RDF-FM3	15.6308	32.994	25.7205	74.3453	24.7818	RDFxMC	3	59.8383	19.9461	0.684651	3.34389	ns	MC3	25.0595
T8-75%RDF-FM5	20.1688	27.996	33.9043	82.069	27.3563	Error	14	407.865	29.1332				MC5	29.4034
Total	139.679	229.686	233.511	602.876	25.1198	Total	23	1501.04		t14=	2.14479		SE.m	2.20353
Mean	17.4599	28.7107	29.1889			SE.m	3.11626						CD	6.68371
CF	15144.1					CD	9.4522
TSSQ	1501.04	RSSQ	705.005			CV	21.4871
tSSQ	388.166	ESSQ	407.865
P UPTAKE AT 90 DAS (kg ha-1)
Treatments	R1	R2	R3	Total	Mean			ANOVA					Factors Mean
T1- 100%RDF-M0	58.3674	45.9998	46.3233	150.691	50.2302								1	59.0145
T2- 100%RDF-SM	61.088	54.588	59.4213	175.097	58.3658		df	SS	MSS	Cal F	Table F		0.75	58.2052
T3-100%RDF-FM3	76.5242	65.6762	55.0586	197.259	65.753	Replication	2	165.037	82.5185	0.249659	3.73889	ns	SE.m	5.24821
T4-100%RDF-FM5	65.3821	57.1566	62.588	185.127	61.7089	Treatment	7	1809.62	258.517	0.78214	2.7642	ns	CD	15.9188
T5- 75%RDF-M0	0	45.0979	80.4605	125.558	41.8528	RDF	1	3.92911	3.92911	0.0118875	4.60011	ns	MC0	46.0415
T6- 75%RDF-SM	63.4017	73.6026	55.588	192.592	64.1975	MC	3	1376.84	458.948	1.38854	3.34389	ns	SMC	61.2816
T7-75%RDF-FM3	41.6469	52.9998	72.7938	167.441	55.8135	RDFxMC	3	428.843	142.948	0.432487	3.34389	ns	MC3	60.7833
T8-75%RDF-FM5	72.9997	85.5193	54.3527	212.872	70.9572	Error	14	4627.34	330.525				MC5	66.3331
Total	439.41	480.64	486.586	1406.64	58.6099	Total	23	6602		t14=	2.14479		SE.m	7.42209
Mean	54.9263	60.08	60.8233			SE.m	10.4964						CD	22.5126
CF	82442.8					CD	31.8376
TSSQ	6602	RSSQ	165.037			CV	31.0192
tSSQ	1809.62	ESSQ	4627.34
P UPTAKE IN STRAW AT HARVEST (kg ha-1)
Treatments	R1	R2	R3	Total	Mean			ANOVA					Factors Mean
T1- 100%RDF-M0	82.5891	15.0474	24.611	122.248	40.7492								1	28.7485
T2- 100%RDF-SM	37.8448	19.5588	14.5666	71.9703	23.9901		df	SS	MSS	Cal F	Table F		0.75	18.5066
T3-100%RDF-FM3	26.4532	33.7932	18.2638	78.5102	26.1701	Replication	2	358.834	179.417	0.787942	3.73889	ns	SE.m	4.35606
T4-100%RDF-FM5	24.1988	26.7132	21.3416	72.2536	24.0845	Treatment	7	1329.58	189.94	0.834155	2.7642	ns	CD	13.2127
T5- 75%RDF-M0	0	23.6835	16.8788	40.5623	13.5208	RDF	1	629.377	629.377	2.76402	4.60011	ns	MC0	27.135
T6- 75%RDF-SM	20.361	11.4088	24.3521	56.122	18.7073	MC	3	109.506	36.502	0.160305	3.34389	ns	SMC	21.3487
T7-75%RDF-FM3	21.2727	14.7286	23.7007	59.702	19.9007	RDFxMC	3	590.696	196.899	0.864717	3.34389	ns	MC3	23.0354
T8-75%RDF-FM5	19.9674	24.5421	21.1832	65.6928	21.8976	Error	14	3187.85	227.703				MC5	22.9911
Total	232.687	169.476	164.898	567.061	23.6275	Total	23	4876.26		t14=	2.14479		SE.m	6.1604
Mean	29.0859	21.1845	20.6122			SE.m	8.71212						CD	18.6856
CF	13398.2					CD	26.4255
TSSQ	4876.26	RSSQ	358.834			CV	63.8655
tSSQ	1329.58	ESSQ	3187.85
P UPTAKE IN GRAIN AT HARVEST (kg ha-1)
Treatments	R1	R2	R3	Total	Mean			ANOVA					Factors Mean
T1- 100%RDF-M0				0	0								1	0
T2- 100%RDF-SM				0	0		df	SS	MSS	Cal F	Table F		0.75	0
T3-100%RDF-FM3				0	0	Replication	2	0	0	#DIV/0!	3.73889	#DIV/0!	SE.m	0
T4-100%RDF-FM5				0	0	Treatment	7	0	0	#DIV/0!	2.7642	#DIV/0!	CD	0
T5- 75%RDF-M0				0	0	RDF	1	0	0	#DIV/0!	4.60011	#DIV/0!	MC0	0
T6- 75%RDF-SM				0	0	MC	3	0	0	#DIV/0!	3.34389	#DIV/0!	SMC	0
T7-75%RDF-FM3				0	0	RDFxMC	3	0	0	#DIV/0!	3.34389	#DIV/0!	MC3	0
T8-75%RDF-FM5				0	0	Error	14	0	0				MC5	0
Total	0	0	0	0	#DIV/0!	Total	23	0		t14=	2.14479		SE.m	0
Mean	0	0	0			SE.m	0						CD	0
CF	0					CD	0
TSSQ	0	RSSQ	0			CV	#DIV/0!
tSSQ	0	ESSQ	0
TOTAL P UPTAKE AT HARVEST (kg ha-1)
Treatments	R1	R2	R3	Total	Mean			ANOVA					Factors Mean
T1- 100%RDF-M0	82.5891	15.0474	24.611	122.248	40.7492								1	28.7485
T2- 100%RDF-SM	37.8448	19.5588	14.5666	71.9703	23.9901		df	SS	MSS	Cal F	Table F		0.75	18.5066
T3-100%RDF-FM3	26.4532	33.7932	18.2638	78.5102	26.1701	Replication	2	358.834	179.417	0.787942	3.73889	ns	SE.m	4.35606
T4-100%RDF-FM5	24.1988	26.7132	21.3416	72.2536	24.0845	Treatment	7	1329.58	189.94	0.834155	2.7642	ns	CD	13.2127
T5- 75%RDF-M0	0	23.6835	16.8788	40.5623	13.5208	RDF	1	629.377	629.377	2.76402	4.60011	ns	MC0	27.135
T6- 75%RDF-SM	20.361	11.4088	24.3521	56.122	18.7073	MC	3	109.506	36.502	0.160305	3.34389	ns	SMC	21.3487
T7-75%RDF-FM3	21.2727	14.7286	23.7007	59.702	19.9007	RDFxMC	3	590.696	196.899	0.864717	3.34389	ns	MC3	23.0354
T8-75%RDF-FM5	19.9674	24.5421	21.1832	65.6928	21.8976	Error	14	3187.85	227.703				MC5	22.9911
Total	232.687	169.476	164.898	567.061	23.6275	Total	23	4876.26		t14=	2.14479		SE.m	6.1604
Mean	29.0859	21.1845	20.6122			SE.m	8.71212						CD	18.6856
CF	13398.2					CD	26.4255
TSSQ	4876.26	RSSQ	358.834			CV	63.8655
tSSQ	1329.58	ESSQ	3187.85
K UPTAKE AT 30 DAS (kg ha-1)
Treatments	R1	R2	R3	Total	Mean			ANOVA					Factors Mean
T1- 100%RDF-M0	19.1854	12.2472	9.92188	41.3545	13.7848								1	13.2861
T2- 100%RDF-SM	14.3877	13.8277	17.7886	46.004	15.3347		df	SS	MSS	Cal F	Table F		0.75	10.5652
T3-100%RDF-FM3	14.6212	6.9072	14.6826	36.211	12.0703	Replication	2	3.98639	1.9932	0.0950127	3.73889	ns	SE.m	1.32219
T4-100%RDF-FM5	10.3668	12.8124	12.6845	35.8638	11.9546	Treatment	7	83.8294	11.9756	0.57086	2.7642	ns	CD	4.01045
T5- 75%RDF-M0	0	14.8764	13.3132	28.1896	9.39654	RDF	1	44.4201	44.4201	2.11744	4.60011	ns	MC0	11.5907
T6- 75%RDF-SM	8.86026	7.2185	12.8065	28.8853	9.62843	MC	3	4.39762	1.46587	0.069876	3.34389	ns	SMC	12.4815
T7-75%RDF-FM3	11.7157	17.0597	8.17883	36.9542	12.3181	RDFxMC	3	35.0117	11.6706	0.556318	3.34389	ns	MC3	12.1942
T8-75%RDF-FM5	11.6707	12.4476	8.63492	32.7532	10.9177	Error	14	293.695	20.9782				MC5	11.4362
Total	90.8079	97.3966	98.011	286.216	11.9256	Total	23	381.511		t14=	2.14479		SE.m	1.86986
Mean	11.351	12.1746	12.2514			SE.m	2.64438						CD	5.67163
CF	3413.31					CD	8.02089
TSSQ	381.511	RSSQ	3.98639			CV	38.4063
tSSQ	83.8294	ESSQ	293.695
K UPTAKE AT 60 DAS (kg ha-1)
Treatments	R1	R2	R3	Total	Mean			ANOVA					Factors Mean
T1- 100%RDF-M0	93.2021	160.701	157.169	411.072	137.024								1	124.537
T2- 100%RDF-SM	75.5077	103.361	152.613	331.482	110.494		df	SS	MSS	Cal F	Table F		0.75	96.5126
T3-100%RDF-FM3	117.98	147.922	119.625	385.526	128.509	Replication	2	9094.25	4547.12	4.21052	3.73889	sig	SE.m	9.48659
T4-100%RDF-FM5	96.3596	144.533	125.465	366.358	122.119	Treatment	7	8345.04	1192.15	1.1039	2.7642	ns	CD	28.7746
T5- 75%RDF-M0	0	135.286	89.1221	224.408	74.8028	RDF	1	4712.05	4712.05	4.36323	4.60011	ns	MC0	105.913
T6- 75%RDF-SM	101.377	79.0466	114.852	295.276	98.4252	MC	3	794.527	264.842	0.245237	3.34389	ns	SMC	104.46
T7-75%RDF-FM3	89.362	99.9676	102.63	291.959	97.3197	RDFxMC	3	2838.47	946.155	0.876114	3.34389	ns	MC3	112.914
T8-75%RDF-FM5	97.6897	70.3411	178.477	346.508	115.503	Error	14	15119.2	1079.94				MC5	118.811
Total	671.478	941.158	1039.95	2652.59	110.525	Total	23	32558.5		t14=	2.14479		SE.m	13.4161
Mean	83.9347	117.645	129.994			SE.m	18.9732						CD	40.6934
CF	293176					CD	57.5492
TSSQ	32558.5	RSSQ	9094.25			CV	29.7332
tSSQ	8345.04	ESSQ	15119.2
K UPTAKE AT 90 DAS (kg ha-1)
Treatments	R1	R2	R3	Total	Mean			ANOVA					Factors Mean
T1- 100%RDF-M0	235.304	161.839	167.708	564.851	188.284								1	195.306
T2- 100%RDF-SM	191.284	199.133	209.696	600.113	200.038		df	SS	MSS	Cal F	Table F		0.75	197.152
T3-100%RDF-FM3	218.242	180.564	199.333	598.139	199.38	Replication	2	3439.61	1719.81	0.547276	3.73889	ns	SE.m	16.1825
T4-100%RDF-FM5	212.007	191.859	176.699	580.566	193.522	Treatment	7	14241.3	2034.47	0.64741	2.7642	ns	CD	49.0846
T5- 75%RDF-M0	0	207.613	218.852	426.465	142.155	RDF	1	20.4547	20.4547	0.0065091	4.60011	ns	MC0	165.219
T6- 75%RDF-SM	219.282	284.374	174.649	678.306	226.102	MC	3	8506.78	2835.59	0.902342	3.34389	ns	SMC	213.07
T7-75%RDF-FM3	174.639	186.319	224.729	585.688	195.229	RDFxMC	3	5714.08	1904.69	0.606111	3.34389	ns	MC3	197.304
T8-75%RDF-FM5	207.319	280.279	187.769	675.367	225.122	Error	14	43994.8	3142.48				MC5	209.322
Total	1458.08	1691.98	1559.44	4709.49	196.229	Total	23	61675.7		t14=	2.14479		SE.m	22.8855
Mean	182.26	211.497	194.929			SE.m	32.365						CD	69.4161
CF	924139					CD	98.1691
TSSQ	61675.7	RSSQ	3439.61			CV	28.5676
tSSQ	14241.3	ESSQ	43994.8
K UPTAKE IN STRAW AT HARVEST (kg ha-1)
Treatments	R1	R2	R3	Total	Mean			ANOVA					Factors Mean
T1- 100%RDF-M0	469.176	504.205	412.874	1386.26	462.085								1	386.591
T2- 100%RDF-SM	264.914	254.939	302.099	821.952	273.984		df	SS	MSS	Cal F	Table F		0.75	399.467
T3-100%RDF-FM3	160.767	575.329	400.197	1136.29	378.764	Replication	2	48340.5	24170.2	2.13273	3.73889	ns	SE.m	30.7314
T4-100%RDF-FM5	368.99	512.894	412.713	1294.6	431.532	Treatment	7	190716	27245.1	2.40405	2.7642	ns	CD	93.214
T5- 75%RDF-M0	0	354.017	368.726	722.743	240.914	RDF	1	994.599	994.599	0.0877611	4.60011	ns	MC0	351.5
T6- 75%RDF-SM	421.229	293.92	414.856	1130.01	376.668	MC	3	73836.4	24612.1	2.17172	3.34389	ns	SMC	325.326
T7-75%RDF-FM3	523.888	457.971	543.763	1525.62	508.541	RDFxMC	3	115885	38628.2	3.40847	3.34389	sig	MC3	443.653
T8-75%RDF-FM5	430.726	492.627	491.875	1415.23	471.743	Error	14	158662	11333				MC5	451.638
Total	2639.69	3445.9	3347.1	9432.7	393.029	Total	23	397718		t14=	2.14479		SE.m	43.4608
Mean	329.961	430.738	418.388			SE.m	61.4628						CD	131.825
CF	3.70732e+06					CD	186.428
TSSQ	397718	RSSQ	48340.5			CV	27.0862
tSSQ	190716	ESSQ	158662
K UPTAKE IN GRAIN AT HARVEST (kg ha-1)
Treatments	R1	R2	R3	Total	Mean			ANOVA					Factors Mean
T1- 100%RDF-M0				0	0								1	0
T2- 100%RDF-SM				0	0		df	SS	MSS	Cal F	Table F		0.75	0
T3-100%RDF-FM3				0	0	Replication	2	0	0	#DIV/0!	3.73889	#DIV/0!	SE.m	0
T4-100%RDF-FM5				0	0	Treatment	7	0	0	#DIV/0!	2.7642	#DIV/0!	CD	0
T5- 75%RDF-M0				0	0	RDF	1	0	0	#DIV/0!	4.60011	#DIV/0!	MC0	0
T6- 75%RDF-SM				0	0	MC	3	0	0	#DIV/0!	3.34389	#DIV/0!	SMC	0
T7-75%RDF-FM3				0	0	RDFxMC	3	0	0	#DIV/0!	3.34389	#DIV/0!	MC3	0
T8-75%RDF-FM5				0	0	Error	14	0	0				MC5	0
Total	0	0	0	0	#DIV/0!	Total	23	0		t14=	2.14479		SE.m	0
Mean	0	0	0			SE.m	0						CD	0
CF	0					CD	0
TSSQ	0	RSSQ	0			CV	#DIV/0!
tSSQ	0	ESSQ	0
TOTAL K UPTAKE AT HARVEST (kg ha-1)
Treatments	R1	R2	R3	Total	Mean			ANOVA					Factors Mean
T1- 100%RDF-M0	469.176	504.205	412.874	1386.26	462.085								1	386.591
T2- 100%RDF-SM	264.914	254.939	302.099	821.952	273.984		df	SS	MSS	Cal F	Table F		0.75	399.467
T3-100%RDF-FM3	160.767	575.329	400.197	1136.29	378.764	Replication	2	48340.5	24170.2	2.13273	3.73889	ns	SE.m	30.7314
T4-100%RDF-FM5	368.99	512.894	412.713	1294.6	431.532	Treatment	7	190716	27245.1	2.40405	2.7642	ns	CD	93.214
T5- 75%RDF-M0	0	354.017	368.726	722.743	240.914	RDF	1	994.599	994.599	0.0877611	4.60011	ns	MC0	351.5
T6- 75%RDF-SM	421.229	293.92	414.856	1130.01	376.668	MC	3	73836.4	24612.1	2.17172	3.34389	ns	SMC	325.326
T7-75%RDF-FM3	523.888	457.971	543.763	1525.62	508.541	RDFxMC	3	115885	38628.2	3.40847	3.34389	sig	MC3	443.653
T8-75%RDF-FM5	430.726	492.627	491.875	1415.23	471.743	Error	14	158662	11333				MC5	451.638
Total	2639.69	3445.9	3347.1	9432.7	393.029	Total	23	397718		t14=	2.14479		SE.m	43.4608
Mean	329.961	430.738	418.388			SE.m	61.4628						CD	131.825
CF	3.70732e+06					CD	186.428
TSSQ	397718	RSSQ	48340.5			CV	27.0862
tSSQ	190716	ESSQ	158662

## Sheet: Sheet2
		Cost of cultivation (Rs /ha) of rabi maize as influenced by different drip fertigation levels.
	S.NO.	Treatment	Land preparation	Seeds and sowing	Fertilizers cost	Cost of fertilizer application	Weed control	Plant protection	Harvesting, threshing,cleaning and packing	Transport	Cost of water (Rs. ha mm-1)	cost of irrigation	Cost of drip system	Total production cost	Grain yield yield (kg ha-1)	Income from Grain (Rs. ha-1)	Income from Straw (Rs. ha-1)	Total Gross Returns(Rs. ha-1)	Net Returns(Rs. ha-1)	B:C ratio
	1	T1- 100%RDF-M0	6000	4220	17686.2	1000	3900	3460	16000	3306.88	5412.9	1500	9600	70586	6613.76	94246	3500	97746	27160.1	1.38478
	2	T2- 100%RDF-SM	6000	4220	18186.2	1000	3900	3460	16000	3844.25	5412.9	1500	9600	71623.3	7688.49	109561	3500	113061	41437.7	1.57855
	3	T3-100%RDF-FM3	6000	4220	18186.2	1000	3900	3460	16000	3893.85	5412.9	1500	9600	71672.9	7787.7	110975	3500	114475	42801.8	1.59718
	4	T4-100%RDF-FM5	6000	4220	18186.2	1000	3900	3460	16000	4067.46	5412.9	1500	9600	71846.6	8134.92	115923	3500	119423	47576.1	1.66219
	5	T5- 75%RDF-M0	6000	4220	13264.8	1000	3900	3460	16000	3348.21	5412.9	1500	9600	64357.7	6696.43	95424.1	3500	98924.1	34566.4	1.5371
	6	T6- 75%RDF-SM	6000	4220	13764.8	1000	3900	3460	16000	3348.21	5412.9	1500	9600	64857.7	6696.43	95424.1	3500	98924.1	34066.4	1.52525
	7	T7-75%RDF-FM3	6000	4220	13764.8	1000	3900	3460	16000	3968.25	5412.9	1500	9600	64857.7	7936.51	113095	3500	116595	51737.5	1.79771
	8	T8-75%RDF-FM5	6000	4220	13764.8	1000	3900	3460	16000	4092.26	5412.9	1500	9600	64857.7	8184.52	116629	3500	120129	55271.8	1.8522

## Sheet: Dry mt. new
		2019
		Dry matter 30DAT
Main factors	2
Sub factors	9	Total factors	18
Replications	3
Treatments	R1	R2	R3	Total	Mean									Factors Mean
E1T1	133.31	166.45	174.09	473.85	157.95				ANOVA					1	245.129	1
E1T2	236.06	253.39	267.08	756.53	252.177		df	SS	MSS	Cal F	Table F	Result		2	235.267	2
E1T3	249.08	269.06	303.48	821.62	273.873	Replication	2	14822	7410.99	45.2394	3.2759	S		SE.m	2.46319
E1T4	207.68	241.85	266.08	715.61	238.537	Treatment	17	57908.4	3406.38	20.7938	1.93321	S	Factor A	CD	7.07927
E1T5	243.18	261.06	278.98	783.22	261.073	Factor A	1	1312.76	1312.76	8.01358	4.13002	S		1	157.61	9	9
E1T6	246.48	282.06	313.18	841.72	280.573	Factor B	8	1.43016e+07	1.7877e+06	10912.8	2.22534	S		2	248.252	5	5
E1T7	213.39	231.06	264.08	708.53	236.177	A*B	8	-1.4245e+07	-1.78062e+06	-10869.6	2.22534	NS		3	265.768	2	2
E1T8	262.39	267.35	276.08	805.82	268.607	Error	34	5569.78	163.817					4	234.713	7	7
E1T9	223.34	236.15	252.08	711.57	237.19	Total	53	78300.2		t34=	2.03224			5	254.537	4	3
E2T1	125.65	131.58	214.58	471.81	157.27	SE.m	7.38956							6	273.14	1	1
E2T2	239.86	241.56	251.56	732.98	244.327	CD	21.2378							7	235.427	6	6
E2T3	215.85	264.58	292.56	772.99	257.663	CV	5.32856							8	260.45	3	4
E2T4	224.89	221.89	245.89	692.67	230.89									9	231.885	8	8
E2T5	225.68	252.48	265.84	744	248									SE.m	5.22521
E2T6	241.56	269.87	285.69	797.12	265.707								Factor B	CD	15.0174
E2T7	225.89	231.56	246.58	704.03	234.677
E2T8	238.41	257.89	260.58	756.88	252.293
E2T9	214.87	225.89	238.98	679.74	226.58
Total	3967.57	4305.73	4697.39	12970.7	240.198
Mean	220.421	239.207	260.966
CF	3.11553e+06
TSSQ	78300.2	RSSQ	14822
tSSQ	57908.4	ESSQ	5569.78
		60 DAT
Main factors	2
Sub factors	9	Total factors	18
Replications	3
Treatments	R1	R2	R3	Total	Mean									Factors Mean
E1T1	402.08	413.08	486.09	1301.25	433.75				ANOVA					1	603.796	1
E1T2	631.75	660.39	669.09	1961.23	653.743		df	SS	MSS	Cal F	Table F	Result		2	582.523	2
E1T3	663.09	668.39	679.4	2010.88	670.293	Replication	2	929.43	464.715	2.83679	3.2759	NS		SE.m	6.65102
E1T4	590.34	542.37	520.37	1653.08	551.027	Treatment	17	337031	19825.4	121.021	1.93321	S	Factor A	CD	19.1152
E1T5	655.39	662.08	668.39	1985.86	661.953	Factor A	1	6109.28	6109.28	37.2933	4.13002	S		1	430.665	9	9
E1T6	755.09	659.06	672.04	2086.19	695.397	Factor B	8	8.84067e+07	1.10508e+07	67458.4	2.22534	S		2	642.792	5	5
E1T7	611.07	599.09	469.09	1679.25	559.75	A*B	8	-8.80758e+07	-1.10095e+07	-67205.9	2.22534	NS		3	654.933	2	2
E1T8	655.04	660.39	669.09	1984.52	661.507	Error	34	40608.7	1194.37					4	541.133	7	7
E1T9	587.09	542.06	511.08	1640.23	546.743	Total	53	378569		t34=	2.03224			5	649.227	3	3
E2T1	396.58	403.59	482.57	1282.74	427.58	SE.m	19.953							6	686.972	1	1
E2T2	625.41	631.52	638.59	1895.52	631.84	CD	57.3456							7	553.55	6	6
E2T3	618.57	631.56	668.59	1918.72	639.573	CV	5.82637							8	644.693	4	4
E2T4	502.59	528.59	562.54	1593.72	531.24									9	534.47	8	8
E2T5	611.54	640.11	657.85	1909.5	636.5									SE.m	14.1089
E2T6	704.51	672.54	658.59	2035.64	678.547								Factor B	CD	40.5495
E2T7	543.21	545.87	552.97	1642.05	547.35
E2T8	605.48	625.58	652.58	1883.64	627.88
E2T9	501.42	508.59	556.58	1566.59	522.197
Total	10660.3	10594.9	10775.5	32030.6	593.159
Mean	592.236	588.603	598.639
CF	1.89993e+07
TSSQ	378569	RSSQ	929.43
tSSQ	337031	ESSQ	40608.7
		90 DAT
Main factors	2
Sub factors	9	Total factors	18
Replications	3
Treatments	R1	R2	R3	Total	Mean									Factors Mean
E1T1	515.86	607.84	796.58	1920.28	640.093				ANOVA					1	869.923	1
E1T2	889.69	806.59	978.59	2674.87	891.623		df	SS	MSS	Cal F	Table F	Result		2	830.793	2
E1T3	889.58	985.59	946.58	2821.75	940.583	Replication	2	91242.8	45621.4	278.49	3.2759	S		SE.m	13.1432
E1T4	786.59	823.45	926.54	2536.58	845.527	Treatment	17	470362	27668.4	168.898	1.93321	S	Factor A	CD	37.774
E1T5	886.59	996.25	900.26	2783.1	927.7	Factor A	1	20669.8	20669.8	126.176	4.13002	S		1	623.433	9	9
E1T6	859.62	995.56	1052.16	2907.34	969.113	Factor B	8	1.77942e+08	2.22428e+07	135778	2.22534	S		2	865.368	5	5
E1T7	803.26	916.56	832.56	2552.38	850.793	A*B	8	-1.77493e+08	-2.21866e+07	-135435	2.22534	NS		3	917.627	2	2
E1T8	914.56	913.56	942.57	2770.69	923.563	Error	34	158579	4664.09					4	823.682	7	7
E1T9	768.59	846.65	905.68	2520.92	840.307	Total	53	720184		t34=	2.03224			5	913.62	3	3
E2T1	525.48	559.56	735.28	1820.32	606.773	SE.m	39.4296							6	945.733	1	1
E2T2	765.98	952.68	798.68	2517.34	839.113	CD	113.322							7	838.987	6	6
E2T3	801.56	992.56	889.89	2684.01	894.67	CV	8.03122							8	908.533	4	4
E2T4	715.68	796.58	893.25	2405.51	801.837									9	816.238	8	8
E2T5	815.68	982.68	900.26	2698.62	899.54									SE.m	27.881
E2T6	901.26	945.68	920.12	2767.06	922.353								Factor B	CD	80.1307
E2T7	789.69	905.26	786.59	2481.54	827.18
E2T8	865.59	822.36	992.56	2680.51	893.503
E2T9	769.59	891.24	715.68	2376.51	792.17
Total	14264.9	15740.6	15913.8	45919.3	850.358
Mean	792.492	874.481	884.102
CF	3.90479e+07
TSSQ	720184	RSSQ	91242.8
tSSQ	470362	ESSQ	158579
		AT HARVEST
Main factors	2
Sub factors	9	Total factors	18
Replications	3
Treatments	R1	R2	R3	Total	Mean									Factors Mean
E1T1	597.76	699.75	883.08	2180.59	726.863				ANOVA					1	1005.96	1
E1T2	1056.45	999.02	1111.06	3166.53	1055.51		df	SS	MSS	Cal F	Table F	Result		2	958.419	2
E1T3	987.79	1038.08	1200.06	3225.93	1075.31	Replication	2	20805.4	10402.7	63.502	3.2759	S		SE.m	12.3994
E1T4	992.95	968.39	988.09	2949.43	983.143	Treatment	17	658648	38744	236.508	1.93321	S	Factor A	CD	35.6362
E1T5	1087.49	1067.39	1073.48	3228.36	1076.12	Factor A	1	30511.2	30511.2	186.252	4.13002	S		1	699.435	9	9
E1T6	1113.18	1086.08	1103.18	3302.44	1100.81	Factor B	8	2.37046e+08	2.96307e+07	180877	2.22534	S		2	1028.86	5	5
E1T7	993.19	1078.35	918.06	2989.6	996.533	A*B	8	-2.36418e+08	-2.95522e+07	-180398	2.22534	NS		3	1048.57	2	2
E1T8	1069.09	1053.39	1063.34	3185.82	1061.94	Error	34	141138	4151.12					4	967.072	7	7
E1T9	986.07	958.35	987.78	2932.2	977.4	Total	53	820591		t34=	2.03224			5	1048.07	3	3
E2T1	612.52	652.25	751.25	2016.02	672.007	SE.m	37.1982							6	1074.84	1	1
E2T2	921.54	961.25	1123.85	3006.64	1002.21	CD	106.909							7	976.43	6	6
E2T3	971.15	1013.18	1081.18	3065.51	1021.84	CV	6.55975				47.5404			8	1044.5	4	4
E2T4	924.56	1001.58	926.86	2853	951									9	951.92	8	8
E2T5	989.56	1081.29	989.19	3060.04	1020.01									SE.m	26.3031
E2T6	1081.58	983.16	1081.85	3146.59	1048.86								Factor B	CD	75.5958
E2T7	1001.54	936.58	930.86	2868.98	956.327
E2T8	1101.86	930.16	1049.19	3081.21	1027.07			618.02	657.75	756.75
E2T9	951.15	911.59	916.58	2779.32	926.44			927.04	966.75	1129.35
Total	17439.4	17419.8	18178.9	53038.2	982.189			976.65	1018.68	1086.68
Mean	968.857	967.769	1009.94					930.06	1007.08	932.36
CF	5.20936e+07							995.06	1086.79	994.69
TSSQ	820591	RSSQ	20805.4					1087.08	988.66	1087.35
tSSQ	658648	ESSQ	141138					1007.04	942.08	936.36
								1107.36	935.66	1054.69
								956.65	917.09	922.08
		2020
		Dry matter 30DAT
Main factors	2
Sub factors	9	Total factors	18
Replications	3
Treatments	R1	R2	R3	Total	Mean									Factors Mean
E1T1	132.52	173.5	183.65	489.67	163.223				ANOVA					1	249.708	1	1
E1T2	244.64	261.89	271.66	778.19	259.397		df	SS	MSS	Cal F	Table F	Result		2	240.374	2	2
E1T3	270.81	279.56	290.56	840.93	280.31	Replication	2	8912.39	4456.2	27.2023	3.2759	S		SE.m	2.49801
E1T4	235.1	240.56	249.65	725.31	241.77	Treatment	17	60153.4	3538.44	21.5999	1.93321	S	Factor A	CD	7.17934
E1T5	268.69	272.65	282.25	823.59	274.53	Factor A	1	1176.28	1176.28	7.18045	4.13002	S		1	162.76	9	9
E1T6	243.6	287.89	317.8	849.29	283.097	Factor B	8	1.49155e+07	1.86444e+06	11381.2	2.22534	S		2	252.917	5	5
E1T7	236.66	237.89	244.69	719.24	239.747	A*B	8	-1.48565e+07	-1.85707e+06	-11336.2	2.22534	NS		3	272.335	2	2
E1T8	246.68	266.68	285.56	798.92	266.307	Error	34	5728.36	168.481					4	237.333	7	7
E1T9	232.65	239.65	244.68	716.98	238.993	Total	53	74794.2		t34=	2.03224			5	265.18	3	3
E2T1	122.56	158.65	205.68	486.89	162.297	SE.m	7.49402							6	281.517	1	1
E2T2	234.65	248.21	256.45	739.31	246.437	CD	21.538							7	238.952	6	6
E2T3	248.68	267.56	276.84	793.08	264.36	CV	5.29709							8	260.025	4	4
E2T4	228.56	228.78	241.35	698.69	232.897									9	234.35	8	8
E2T5	242.35	262.13	263.01	767.49	255.83									SE.m	5.29908
E2T6	241.58	272.45	325.78	839.81	279.937								Factor B	CD	15.2297
E2T7	228.31	234.54	251.62	714.47	238.157
E2T8	241.32	256.34	263.57	761.23	253.743
E2T9	224.56	229.15	235.41	689.12	229.707
Total	4123.92	4418.08	4690.21	13232.2	245.041
Mean	229.107	245.449	260.567
CF	3.24243e+06
TSSQ	74794.2	RSSQ	8912.39
tSSQ	60153.4	ESSQ	5728.36
		60 DAT
Main factors	2
Sub factors	9	Total factors	18
Replications	3
Treatments	R1	R2	R3	Total	Mean									Factors Mean
E1T1	420.15	450.24	540.26	1410.65	470.217				ANOVA					1	612.723	1	1
E1T2	641.58	648.59	694.58	1984.75	661.583		df	SS	MSS	Cal F	Table F	Result		2	587.882	2	2
E1T3	610.59	698.89	742.15	2051.63	683.877	Replication	2	42118.3	21059.2	128.553	3.2759	S		SE.m	7.25443
E1T4	527.85	546.25	587.98	1662.08	554.027	Treatment	17	336417	19789.2	120.801	1.93321	S	Factor A	CD	20.8494
E1T5	698.58	654.12	650.58	2003.28	667.76	Factor A	1	8330.34	8330.34	50.8515	4.13002	S		1	446.043	9	9
E1T6	625.68	685.45	778.59	2089.72	696.573	Factor B	8	9.05522e+07	1.1319e+07	69095.6	2.22534	S		2	647.46	5	5
E1T7	510.54	548.35	652.45	1711.34	570.447	A*B	8	-9.02242e+07	-1.1278e+07	-68845.2	2.22534	NS		3	666.825	2	2
E1T8	658.49	659.29	660.25	1978.03	659.343	Error	34	48311.4	1420.92					4	541.572	7	7
E1T9	506.89	543.55	601.59	1652.03	550.677	Total	53	426846		t34=	2.03224			5	664.962	3	3
E2T1	400.26	405.1	460.25	1265.61	421.87	SE.m	21.7633							6	688.827	1	1
E2T2	605.54	695.58	598.89	1900.01	633.337	CD	62.5483							7	556.128	6	6
E2T3	602.15	648.58	698.59	1949.32	649.773	CV	6.27936							8	652.292	4	4
E2T4	510.25	535.54	541.56	1587.35	529.117									9	538.612	8	8
E2T5	695.85	648.49	642.15	1986.49	662.163									SE.m	15.389
E2T6	615.48	651.87	775.89	2043.24	681.08								Factor B	CD	44.2283
E2T7	500.12	505.16	620.15	1625.43	541.81
E2T8	610.25	649.89	675.58	1935.72	645.24
E2T9	502.48	535.58	541.58	1579.64	526.547
Total	10242.7	10710.5	11463.1	32416.3	600.302
Mean	569.041	595.029	636.837
CF	1.94596e+07
TSSQ	426846	RSSQ	42118.3
tSSQ	336417	ESSQ	48311.4
		90 DAT
Main factors	2
Sub factors	9	Total factors	18
Replications	3
Treatments	R1	R2	R3	Total	Mean									Factors Mean
E1T1	559.85	610.25	799.59	1969.69	656.563				ANOVA					1	875.641	1
E1T2	958.86	895.68	841.58	2696.12	898.707		df	SS	MSS	Cal F	Table F	Result		2	834.16	2
E1T3	975.58	950.25	915.48	2841.31	947.103	Replication	2	97775.4	48887.7	298.429	3.2759	S		SE.m	13.5458
E1T4	738.59	825.44	970.15	2534.18	844.727	Treatment	17	480186	28246.2	172.426	1.93321	S	Factor A	CD	38.931
E1T5	895.68	940.15	985.87	2821.7	940.567	Factor A	1	23230	23230	141.805	4.13002	S		1	627.332	9	9
E1T6	910.68	994.56	998.58	2903.82	967.94	Factor B	8	1.7988e+08	2.2485e+07	137257	2.22534	S		2	869.35	5	5
E1T7	778.65	851.24	968.59	2598.48	866.16	A*B	8	-1.79423e+08	-2.24279e+07	-136908	2.22534	NS		3	929.232	2	2
E1T8	941.25	886.58	948.51	2776.34	925.447	Error	34	168443	4954.19					4	826.008	7	7
E1T9	781.58	920.56	798.54	2500.68	833.56	Total	53	746404		t34=	2.03224			5	922.428	3	3
E2T1	511.59	505.86	776.85	1794.3	598.1	SE.m	40.6374							6	947.037	1	1
E2T2	782.54	935.86	801.58	2519.98	839.993	CD	116.793							7	841.815	6	6
E2T3	962.54	835.86	935.68	2734.08	911.36	CV	8.23324							8	910.68	4	4
E2T4	728.86	752.86	940.15	2421.87	807.29									9	820.223	8	8
E2T5	805.75	935.54	971.58	2712.87	904.29									SE.m	28.735
E2T6	816.58	962.56	999.26	2778.4	926.133								Factor B	CD	82.5851
E2T7	742.15	824.57	885.69	2452.41	817.47
E2T8	852.87	908.29	926.58	2687.74	895.913
E2T9	741.58	785.56	893.52	2420.66	806.887
Total	14485.2	15321.7	16357.8	46164.6	854.901
Mean	804.732	851.204	908.766
CF	3.94662e+07
TSSQ	746404	RSSQ	97775.4
tSSQ	480186	ESSQ	168443
		AT HARVEST
Main factors	2
Sub factors	9	Total factors	18
Replications	3
Treatments	R1	R2	R3	Total	Mean									Factors Mean
E1T1	610.29	702.25	910.26	2222.8	740.933				ANOVA					1	1021.89	1
E1T2	1072.58	1021.56	1126.58	3220.72	1073.57		df	SS	MSS	Cal F	Table F	Result		2	967.098	2
E1T3	1005.86	1060.24	1216.58	3282.68	1094.23	Replication	2	23703.1	11851.6	72.3464	3.2759	S		SE.m	12.6776
E1T4	1007.58	985.58	1003.56	2996.72	998.907	Treatment	17	641249	37720.5	230.26	1.93321	S	Factor A	CD	36.4357
E1T5	1101.25	1081.56	1088.95	3271.76	1090.59	Factor A	1	40523	40523	247.367	4.13002	S		1	719.323	9	9
E1T6	1128.56	1100.25	1118.59	3347.4	1115.8	Factor B	8	2.42889e+08	3.03611e+07	185336	2.22534	S		2	1043.41	5	5
E1T7	1007.58	1094.58	940.25	3042.41	1014.14	A*B	8	-2.42288e+08	-3.02861e+07	-184877	2.22534	NS		3	1061.4	2	2
E1T8	1084.53	1067.58	1078.58	3230.69	1076.9	Error	34	147541	4339.46					4	977.855	7	7
E1T9	1000.23	972.25	1003.25	2975.73	991.91	Total	53	812493		t34=	2.03224			5	1058.48	3	3
E2T1	617.98	667.58	807.58	2093.14	697.713	SE.m	38.0327							6	1085.19	1	1
E2T2	937.58	972.58	1129.58	3039.74	1013.25	CD	109.307							7	988.335	6	6
E2T3	983.25	1018.25	1084.25	3085.75	1028.58	CV	6.62394							8	1054.8	4	4
E2T4	933.25	1006.58	930.58	2870.41	956.803									9	961.637	8	8
E2T5	992.25	1092.25	994.59	3079.09	1026.36									SE.m	26.8932
E2T6	1089.58	987.58	1086.58	3163.74	1054.58								Factor B	CD	77.2917
E2T7	1007.48	941.58	938.54	2887.6	962.533
E2T8	1105.25	938.58	1054.25	3098.08	1032.69
E2T9	955.25	917.26	921.58	2794.09	931.363
Total	17640.3	17628.1	18434.1	53702.5	994.492
Mean	980.018	979.338	1024.12
CF	5.34067e+07
TSSQ	812493	RSSQ	23703.1
tSSQ	641249	ESSQ	147541

## Sheet: Grain Yiled
		2019
		Grain yield
Main factors	2
Sub factors	9	Total factors	18
Replications	3
Treatments	R1	R2	R3	Total	Mean									Factors Mean
E1T1	26.5	23.6	21.56	71.66	23.8867				ANOVA					1	40.4304	1		Treatments	R1	R2	R3
E1T2	38.9	42.2	43.5	124.6	41.5333		df	SS	MSS	Cal F	Table F	Result		2	38.6926	2		E1T1	2650	2360	2156			Nutrient applied
E1T3	48.6	47.56	45.8	141.96	47.32	Replication	2	4.52828	2.26414	0.429317	3.2759	NS		SE.m	0.441958			E1T2	3890	4220	4350		N1	0			8.26667
E1T4	38.6	37.8	36.2	112.6	37.5333	Treatment	17	2902.3	170.724	32.372	1.93321	S	Factor A	CD	1.2702			E1T3	4860	4756	4580		N2	150
E1T5	45.8	47.6	44.5	137.9	45.9667	Factor A	1	40.7683	40.7683	7.73031	4.13002	S		1	22.7267	9	9	E1T4	3860	3780	3620		N3	187.5
E1T6	51.8	49.8	47.8	149.4	49.8	Factor B	8	401180	50147.5	9508.76	2.22534	S		2	39.55	5	5	E1T5	4580	4760	4450		N4	71.6
E1T7	40.2	39.5	38.9	118.6	39.5333	A*B	8	-398318	-49789.8	-9440.94	2.22534	NS		3	46.8933	2	2	E1T6	5180	4980	4780		N5	150
E1T8	43.5	42.5	41.9	127.9	42.6333	Error	34	179.31	5.27382					4	37.5167	7	7	E1T7	4020	3950	3890		N6	170
E1T9	36.5	35.7	34.8	107	35.6667	Total	53	3086.14		t34=	2.03224			5	43.75	3	3	E1T8	4350	4250	4190		N7	112.5
E2T1	26.5	15.6	22.6	64.7	21.5667	SE.m	1.32587							6	49.0333	1	1	E1T9	3650	3570	3480		N8	132.5
E2T2	38.5	36.4	37.8	112.7	37.5667	CD	3.8106				1.73778			7	38.5167	6	6	E2T1	2650	1560	2260		N9	20
E2T3	47.8	46.8	44.8	139.4	46.4667	CV	5.80484							8	42.3	4	4	E2T2	3850	3640	3780
E2T4	36.8	35.9	39.8	112.5	37.5									9	35.7667	8	8	E2T3	4780	4680	4480
E2T5	36.5	45.6	42.5	124.6	41.5333		Difference							SE.m	0.937534			E2T4	3680	3590	3980
E2T6	46.8	50.8	47.2	144.8	48.2667	1	2.32						Factor B	CD	2.6945			E2T5	3650	4560	4250
E2T7	37.9	37.8	36.8	112.5	37.5	2	3.96667											E2T6	4680	5080	4720
E2T8	40.9	41.8	43.2	125.9	41.9667	3	0.853333											E2T7	3790	3780	3680
E2T9	34.8	37.6	35.2	107.6	35.8667	4	0.0333333			1.43324								E2T8	4090	4180	4320
Total	716.9	714.56	704.86	2136.32	39.5615	5	4.43333											E2T9	3480	3760	3520
Mean	39.8278	39.6978	39.1589			6	1.53333
CF	84516					7	2.03333
TSSQ	3086.14	RSSQ	4.52828			8	0.666667
tSSQ	2902.3	ESSQ	179.31			9	-0.2
		Straw yield
Main factors	2
Sub factors	9	Total factors	18
Replications	3
Treatments	R1	R2	R3	Total	Mean									Factors Mean
E1T1	37.4	36.8	40.8	115	38.3333				ANOVA					1	62.7148	1
E1T2	61.2	66.2	66.2	193.6	64.5333		df	SS	MSS	Cal F	Table F	Result		2	60.9667	2
E1T3	68.9	70.2	71.6	210.7	70.2333	Replication	2	3.71593	1.85796	0.352299	3.2759	NS		SE.m	0.517491
E1T4	61.6	59.5	64.5	185.6	61.8667	Treatment	17	4870.16	286.48	54.3211	1.93321	S	Factor A	CD	1.48728
E1T5	70.4	66.8	66.8	204	68	Factor A	1	41.2563	41.2563	7.82285	4.13002	S		1	37.2167	9	9
E1T6	71.2	77.1	67.6	215.9	71.9667	Factor B	8	956916	119615	22680.8	2.22534	S		2	63.6833	5	5
E1T7	63.5	60.8	64.6	188.9	62.9667	A*B	8	-952087	-119011	-22566.4	2.22534	NS		3	69.3167	2	2
E1T8	68.8	64.6	65.9	199.3	66.4333	Error	34	245.837	7.23051					4	61.1167	7	7
E1T9	59.9	61.6	58.8	180.3	60.1	Total	53	5119.71		t34=	2.03224			5	67.25	3	3
E2T1	35.7	33.2	39.4	108.3	36.1	SE.m	1.55247							6	71.2	1	1
E2T2	60.5	64.2	63.8	188.5	62.8333	CD	4.46185							7	62.1833	6	6
E2T3	69.8	64.6	70.8	205.2	68.4	CV	4.3482				1.74815			8	65.55	4	4
E2T4	58.9	59.1	63.1	181.1	60.3667					1.74815				9	59.05	8	8
E2T5	63.5	69.2	66.8	199.5	66.5		Difference							SE.m	1.09776
E2T6	71.6	73.2	66.5	211.3	70.4333	1	2.23333						Factor B	CD	3.155
E2T7	61.8	63.6	58.8	184.2	61.4	2	1.7	51.2	56.2	56.2
E2T8	62.2	65.6	66.2	194	64.6667	3	1.83333	58.9	60.2	61.6
E2T9	59.8	58.5	55.7	174	58	4	1.5	51.6	49.5	54.5
Total	1106.7	1114.8	1117.9	3339.4	61.8407	5	1.5	60.4	56.8	56.8
Mean	61.4833	61.9333	62.1056			6	1.53333	61.2	67.1	57.6
CF	206511					7	1.56667	53.5	50.8	54.6
TSSQ	5119.71	RSSQ	3.71593			8	1.76667	58.8	54.6	55.9
tSSQ	4870.16	ESSQ	245.837			9	2.1	49.9	51.6	48.8
								50.5	54.2	53.8
								59.8	54.6	60.8
		Biological yield						48.9	49.1	53.1
								53.5	59.2	56.8
Main factors	2							61.6	63.2	56.5
Sub factors	9	Total factors	18					51.8	53.6	48.8
Replications	3							52.2	55.6	56.2
Treatments	R1	R2	R3	Total	Mean			49.8	48.5	45.7				Factors Mean
E1T1	63.9	60.4	62.36	186.66	62.22				ANOVA					1	103.145	1
E1T2	100.1	108.4	109.7	318.2	106.067		df	SS	MSS	Cal F	Table F	Result		2	99.6593	2
E1T3	117.5	117.76	117.4	352.66	117.553	Replication	2	1.43413	0.717067	0.135967	3.2759	NS		SE.m	0.791239
E1T4	100.2	97.3	100.7	298.2	99.4	Treatment	17	15082	887.178	168.223	1.93321	S	Factor A	CD	2.27404
E1T5	116.2	114.4	111.3	341.9	113.967	Factor A	1	164.048	164.048	31.106	4.13002	S		1	59.9433	9	9
E1T6	123	126.9	115.4	365.3	121.767	Factor B	8	2.59587e+06	324484	61527.3	2.22534	S		2	103.233	5	5
E1T7	103.7	100.3	103.5	307.5	102.5	A*B	8	-2.58095e+06	-322619	-61173.7	2.22534	NS		3	116.21	2	2
E1T8	112.3	107.1	107.8	327.2	109.067	Error	34	574.723	16.9036					4	98.6333	7	7
E1T9	96.4	97.3	93.6	287.3	95.7667	Total	53	15658.2		t34=	2.03224			5	111	3	3
E2T1	62.2	48.8	62	173	57.6667	SE.m	2.37372							6	120.233	1	1
E2T2	99	100.6	101.6	301.2	100.4	CD	6.82213							7	100.7	6	6
E2T3	117.6	111.4	115.6	344.6	114.867	CV	4.05455							8	107.85	4	4
E2T4	95.7	95	102.9	293.6	97.8667									9	94.8167	8	8
E2T5	100	114.8	109.3	324.1	108.033									SE.m	1.67847
E2T6	118.4	124	113.7	356.1	118.7								Factor B	CD	4.82397
E2T7	99.7	101.4	95.6	296.7	98.9
E2T8	103.1	107.4	109.4	319.9	106.633
E2T9	94.6	96.1	90.9	281.6	93.8667
Total	1823.6	1829.36	1822.76	5475.72	101.402
Mean	101.311	101.631	101.264
CF	555250
TSSQ	15658.2	RSSQ	1.43413
tSSQ	15082	ESSQ	574.723
		Harvest Index
Main factors	2
Sub factors	9	Total factors	18
Replications	3
Treatments	R1	R2	R3	Total	Mean									Factors Mean
E1T1	41.471	39.0728	34.5734	115.117	38.3724				ANOVA					1	39.0807	1
E1T2	38.8611	38.9299	39.6536	117.445	39.1482		df	SS	MSS	Cal F	Table F	Result		2	38.6387	2
E1T3	41.3617	40.3872	39.0119	120.761	40.2536	Replication	2	7.15382	3.57691	0.678239	3.2759	NS		SE.m	0.352377
E1T4	38.523	38.8489	35.9484	113.32	37.7734	Treatment	17	78.2196	4.60115	0.872452	1.93321	NS	Factor A	CD	1.01274
E1T5	39.4148	41.6084	39.982	121.005	40.3351	Factor A	1	2.63692	2.63692	0.500003	4.13002	NS		1	37.6901	9	9
E1T6	42.1138	39.2435	41.4211	122.778	40.9262	Factor B	8	365393	45674.1	8660.53	2.22534	S		2	38.2869	5	5
E1T7	38.7657	39.3819	37.5845	115.732	38.5774	A*B	8	-365317	-45664.6	-8658.74	2.22534	NS		3	40.362	2	2
E1T8	38.7355	39.6825	38.8683	117.286	39.0954	Error	34	113.988	3.35259					4	38.0403	7	7
E1T9	37.8631	36.6906	37.1795	111.733	37.2444	Total	53	199.361		t34=	2.03224			5	39.3517	3	3
E2T1	42.6045	31.9672	36.4516	111.023	37.0078	SE.m	1.05713							6	40.7977	1	1
E2T2	38.8889	36.1829	37.2047	112.277	37.4255	CD	3.03823							7	38.253	6	6
E2T3	40.6463	42.0108	38.7543	121.411	40.4705	CV	4.71184							8	39.2274	4	4
E2T4	38.4535	37.7895	38.6783	114.921	38.3071									9	37.7282	8	8
E2T5	36.5	39.7213	38.8838	115.105	38.3684									SE.m	0.747505
E2T6	39.527	40.9677	41.5128	122.008	40.6692								Factor B	CD	2.14835
E2T7	38.014	37.2781	38.4937	113.786	37.9286
E2T8	39.6702	38.9199	39.4881	118.078	39.3594
E2T9	36.7865	39.1259	38.7239	114.636	38.2121
Total	708.201	697.809	692.414	2098.42	38.8597
Mean	39.3445	38.7672	38.4674
CF	81544.1
TSSQ	199.361	RSSQ	7.15382
tSSQ	78.2196	ESSQ	113.988
		2020
		Grain yield
Main factors	2
Sub factors	9	Total factors	18
Replications	3
Treatments	R1	R2	R3	Total	Mean									Factors Mean
E1T1	26.5	21.8	23.56	71.86	23.9533				ANOVA					1	41.2859	1	1
E1T2	39.56	43.6	44.5	127.66	42.5533		df	SS	MSS	Cal F	Table F	Result		2	39.6833	2	2
E1T3	49.5	48.6	46.5	144.6	48.2	Replication	2	4.76578	2.38289	0.451834	3.2759	NS		SE.m	0.490755
E1T4	39.6	38.9	36.8	115.3	38.4333	Treatment	17	2997.04	176.296	33.4286	1.93321	S	Factor A	CD	1.41044
E1T5	46.5	48.9	45.6	141	47	Factor A	1	34.6721	34.6721	6.57438	4.13002	S		1	23.51	9	9
E1T6	52.6	50.8	48.9	152.3	50.7667	Factor B	8	419984	52497.9	9954.45	2.22534	S		2	40.3433	5	5
E1T7	39.8	39.4	40.8	120	40	A*B	8	-417021	-52127.7	-9884.23	2.22534	NS		3	47.925	2	2
E1T8	44.6	43.8	42.8	131.2	43.7333	Error	34	221.091	6.50269					4	37.8167	7	7
E1T9	39.5	36.8	34.5	110.8	36.9333	Total	53	3222.9		t34=	2.03224			5	44.9167	3	3
E2T1	20.1	22.6	26.5	69.2	23.0667	SE.m	1.47226							6	50.1833	1	1
E2T2	39.8	35.1	39.5	114.4	38.1333	CD	4.23133							7	39.65	6	6
E2T3	48.95	49.5	44.5	142.95	47.65	CV	6.29878							8	43.4333	4	4
E2T4	38.4	37.8	35.4	111.6	37.2									9	36.5833	8	8
E2T5	37.5	47.5	43.5	128.5	42.8333									SE.m	1.04105
E2T6	47.5	53.5	47.8	148.8	49.6								Factor B	CD	2.992
E2T7	40.5	35.8	41.6	117.9	39.3
E2T8	41.5	42.6	45.3	129.4	43.1333
E2T9	35.6	38.6	34.5	108.7	36.2333
Total	728.01	735.6	722.56	2186.17	40.4846
Mean	40.445	40.8667	40.1422
CF	88506.3
TSSQ	3222.9	RSSQ	4.76578
tSSQ	2997.04	ESSQ	221.091
		Straw yield
Main factors	2
Sub factors	9	Total factors	18
Replications	3
Treatments	R1	R2	R3	Total	Mean									Factors Mean
E1T1	39.2	38.5	42.2	119.9	39.9667				ANOVA					1	63.7926	1	1
E1T2	65.5	64.1	66.5	196.1	65.3667		df	SS	MSS	Cal F	Table F	Result		2	62.0963	2	2
E1T3	69.2	71.8	73.8	214.8	71.6	Replication	2	1.77333	0.886667	0.168126	3.2759	NS		SE.m	0.646318
E1T4	61.9	60.9	63.9	186.7	62.2333	Treatment	17	4759.53	279.972	53.0872	1.93321	S	Factor A	CD	1.85754
E1T5	70.2	68.9	67.8	206.9	68.9667	Factor A	1	38.8452	38.8452	7.36566	4.13002	S		1	38.7167	9	9
E1T6	72.5	76.5	69.8	218.8	72.9333	Factor B	8	989096	123637	23443.5	2.22534	S		2	64.3833	5	5
E1T7	65.2	62.5	65.2	192.9	64.3	A*B	8	-984375	-123047	-23331.7	2.22534	NS		3	69.7667	2	2
E1T8	70.8	62.9	68.8	202.5	67.5	Error	34	383.473	11.2786					4	61.5333	7	7
E1T9	60.1	64.2	59.5	183.8	61.2667	Total	53	5144.77		t34=	2.03224			5	68.35	3	3
E2T1	36.5	35.5	40.4	112.4	37.4667	SE.m	1.93895							6	72.5333	1	1
E2T2	63.6	64.1	62.5	190.2	63.4	CD	5.57261							7	63.75	6	6
E2T3	71.5	62.5	69.8	203.8	67.9333	CV	5.33545							8	67.2167	4	4
E2T4	61.5	58.5	62.5	182.5	60.8333			E1T1						9	60.25	8	8
E2T5	63.6	71.7	67.9	203.2	67.7333			E1T2	55.5	54.1	56.5			SE.m	1.37105
E2T6	72.6	75.2	68.6	216.4	72.1333			E1T3	59.2	61.8	63.8		Factor B	CD	3.94043
E2T7	63.2	65.5	60.9	189.6	63.2			E1T4	51.9	50.9	53.9
E2T8	62.8	70.9	67.1	200.8	66.9333			E1T5	60.2	58.9	57.8
E2T9	66.5	59.8	51.4	177.7	59.2333			E1T6	62.5	66.5	59.8
Total	1136.4	1134	1128.6	3399	62.9444			E1T7	55.2	52.5	55.2
Mean	63.1333	63	62.7					E1T8	60.8	52.9	58.8
CF	213948							E1T9	50.1	54.2	49.5
TSSQ	5144.77	RSSQ	1.77333					E2T1
tSSQ	4759.53	ESSQ	383.473					E2T2	53.6	54.1	52.5
								E2T3	61.5	52.5	59.8
								E2T4	51.5	48.5	52.5
								E2T5	53.6	61.7	57.9
		Biological yield						E2T6	62.6	65.2	58.6
								E2T7	53.2	55.5	50.9
Main factors	2							E2T8	52.8	60.9	57.1
Sub factors	9	Total factors	18					E2T9	56.5	49.8	41.4
Replications	3
Treatments	R1	R2	R3	Total	Mean									Factors Mean
E1T1	65.7	60.3	65.76	191.76	63.92				ANOVA					1	105.079	1
E1T2	105.06	107.7	111	323.76	107.92		df	SS	MSS	Cal F	Table F	Result		2	101.78	2
E1T3	118.7	120.4	120.3	359.4	119.8	Replication	2	10.0469	5.02345	0.952525	3.2759	NS		SE.m	0.881524
E1T4	101.5	99.8	100.7	302	100.667	Treatment	17	15086	887.413	168.268	1.93321	S	Factor A	CD	2.53353
E1T5	116.7	117.8	113.4	347.9	115.967	Factor A	1	146.916	146.916	27.8576	4.13002	S		1	62.2267	9	9
E1T6	125.1	127.3	118.7	371.1	123.7	Factor B	8	2.69646e+06	337058	63911.5	2.22534	S		2	104.727	5	5
E1T7	105	101.9	106	312.9	104.3	A*B	8	-2.68152e+06	-335190	-63557.4	2.22534	NS		3	117.692	2	2
E1T8	115.4	106.7	111.6	333.7	111.233	Error	34	713.364	20.9813					4	99.35	7	7
E1T9	99.6	101	94	294.6	98.2	Total	53	15809.4		t34=	2.03224			5	113.267	3	3
E2T1	56.6	58.1	66.9	181.6	60.5333	SE.m	2.64457							6	122.717	1	1
E2T2	103.4	99.2	102	304.6	101.533	CD	7.60058							7	103.4	6	6
E2T3	120.45	112	114.3	346.75	115.583	CV	4.42867							8	110.65	4	4
E2T4	99.9	96.3	97.9	294.1	98.0333									9	96.8333	8	8
E2T5	101.1	119.2	111.4	331.7	110.567									SE.m	1.87
E2T6	120.1	128.7	116.4	365.2	121.733								Factor B	CD	5.37442
E2T7	103.7	101.3	102.5	307.5	102.5
E2T8	104.3	113.5	112.4	330.2	110.067
E2T9	102.1	98.4	85.9	286.4	95.4667
Total	1864.41	1869.6	1851.16	5585.17	103.429
Mean	103.578	103.867	102.842
CF	577669
TSSQ	15809.4	RSSQ	10.0469
tSSQ	15086	ESSQ	713.364
		Harvest Index
Main factors	2
Sub factors	9	Total factors	18
Replications	3
Treatments	R1	R2	R3	Total	Mean									Factors Mean
E1T1	40.3349	36.1526	35.8273	112.315	37.4382				ANOVA					1	39.1268	1
E1T2	37.6547	40.4828	40.0901	118.228	39.4092		df	SS	MSS	Cal F	Table F	Result		2	38.8622	2
E1T3	41.7018	40.3654	38.6534	120.721	40.2402	Replication	2	0.703536	0.351768	0.0667008	3.2759	NS		SE.m	0.357729
E1T4	39.0148	38.978	36.5442	114.537	38.179	Treatment	17	82.8068	4.87099	0.923617	1.93321	NS	Factor A	CD	1.02812
E1T5	39.8458	41.511	40.2116	121.568	40.5228	Factor A	1	0.945057	0.945057	0.179198	4.13002	NS		1	37.7228	9	9
E1T6	42.0464	39.9057	41.1963	123.148	41.0495	Factor B	8	368010	46001.3	8722.58	2.22534	S		2	38.4712	5	5
E1T7	37.9048	38.6654	38.4906	115.061	38.3536	A*B	8	-367928	-45991.1	-8720.63	2.22534	NS		3	40.7482	2	2
E1T8	38.6482	41.0497	38.3513	118.049	39.3497	Error	34	117.477	3.4552					4	38.0645	7	7
E1T9	39.6586	36.4356	36.7021	112.796	37.5988	Total	53	200.987		t34=	2.03224			5	39.593	3	3
E2T1	35.5124	38.8985	39.6114	114.022	38.0074	SE.m	1.07319							6	40.8889	1	1
E2T2	38.4913	35.3831	38.7255	112.6	37.5333	CD	3.08437							7	38.3403	6	6
E2T3	40.6393	44.1964	38.9326	123.768	41.2561	CV	4.76687							8	39.279	4	4
E2T4	38.4384	39.2523	36.1593	113.85	37.95									9	37.8425	8	8
E2T5	37.092	39.849	39.0485	115.989	38.6632									SE.m	0.758859
E2T6	39.5504	41.5695	41.0653	122.185	40.7284								Factor B	CD	2.18098
E2T7	39.055	35.3406	40.5854	114.981	38.327
E2T8	39.7891	37.533	40.3025	117.625	39.2082
E2T9	34.8678	39.2276	40.163	114.258	38.0861
Total	700.245	704.796	700.66	2105.7	38.9945
Mean	38.9025	39.1554	38.9256
CF	82110.7
TSSQ	200.987	RSSQ	0.703536
tSSQ	82.8068	ESSQ	117.477

## Sheet: DATA
			2019						2019						2019						2019						2019						2019						2019						2019
			Grain yield						Nitrogen content						N Uptake						Protein content						protein yield						Phosphorous content						P Uptake						K content
									Grain						Grain						Grain						Grain						Grain						Grain						Grain
	Treatments	R1	R2	R3			Treatments	R1	R2	R3			Treatments	R1	R2	R3			Treatments	R1	R2	R3			Treatments	R1	R2	R3			Treatments	R1	R2	R3			Treatments	R1	R2	R3			Treatments	R1	R2	R3			Treatments
	E1T1	26.5	23.6	21.56			E1T1	1.17	1.14	1.16			E1T1	31.005	26.904	25.0096			E1T1	6.7275	6.555	6.67			E1T1	178.279	154.698	143.805			E1T1	0.29	0.27	0.29			E1T1	7.685	6.372	6.2524			E1T1	0.36	0.38	0.34			E1T1
	E1T2	38.9	42.2	43.5			E1T2	1.26	1.26	1.25			E1T2	49.014	53.172	54.375			E1T2	7.245	7.245	7.1875			E1T2	281.83	305.739	312.656			E1T2	0.357148	0.36	0.38			E1T2	13.8931	15.192	16.53			E1T2	0.447148	0.46	0.47			E1T2
	E1T3	48.6	47.56	45.8			E1T3	1.32	1.34	1.32			E1T3	64.152	63.7304	60.456			E1T3	7.59	7.705	7.59			E1T3	368.874	366.45	347.622			E1T3	0.36	0.33	0.35			E1T3	17.496	15.6948	16.03			E1T3	0.45	0.42	0.47			E1T3
	E1T4	38.6	37.8	36.2			E1T4	1.25	1.23	1.28			E1T4	48.25	46.494	46.336			E1T4	7.1875	7.0725	7.36			E1T4	277.438	267.34	266.432			E1T4	0.33	0.32	0.35			E1T4	12.738	12.096	12.67			E1T4	0.42	0.41	0.41			E1T4
	E1T5	45.8	47.6	44.5			E1T5	1.25	1.32	1.34			E1T5	57.25	62.832	59.63			E1T5	7.1875	7.59	7.705			E1T5	329.188	361.284	342.872			E1T5	0.387472	0.38	0.37			E1T5	17.7462	18.088	16.465			E1T5	0.477472	0.47	0.46			E1T5
	E1T6	51.8	49.8	47.8			E1T6	1.34	1.42	1.36			E1T6	69.412	70.716	65.008			E1T6	7.705	8.165	7.82			E1T6	399.119	406.617	373.796			E1T6	0.41	0.34	0.38			E1T6	21.238	16.932	18.164			E1T6	0.51	0.43	0.47			E1T6
	E1T7	40.2	39.5	38.9			E1T7	1.32	1.25	1.21			E1T7	53.064	49.375	47.069			E1T7	7.59	7.1875	6.9575			E1T7	305.118	283.906	270.647			E1T7	0.36	0.33	0.35			E1T7	14.472	13.035	13.615			E1T7	0.45	0.42	0.41			E1T7
	E1T8	43.5	42.5	41.9			E1T8	1.28	1.23	1.26			E1T8	55.68	52.275	52.794			E1T8	7.36	7.0725	7.245			E1T8	320.16	300.581	303.565			E1T8	0.36	0.38	0.37			E1T8	15.66	16.15	15.503			E1T8	0.45	0.47	0.46			E1T8
	E1T9	36.5	35.7	34.8			E1T9	1.25	1.22	1.17			E1T9	45.625	43.554	40.716			E1T9	7.1875	7.015	6.7275			E1T9	262.344	250.436	234.117			E1T9	0.35	0.31	0.38			E1T9	12.775	11.067	13.224			E1T9	0.39	0.4	0.41			E1T9
	E2T1	26.5	15.6	22.6			E2T1	1.07	1.13	1.2			E2T1	28.355	17.628	27.12			E2T1	6.1525	6.4975	6.9			E2T1	163.041	101.361	155.94			E2T1	0.3	0.31	0.15			E2T1	7.95	4.836	3.39			E2T1	0.39	0.3	0.24			E2T1
	E2T2	38.5	36.4	37.8			E2T2	1.25	1.3	1.18			E2T2	48.125	47.32	44.604			E2T2	7.1875	7.475	6.785			E2T2	276.719	272.09	256.473			E2T2	0.31	0.32	0.32			E2T2	11.935	11.648	12.096			E2T2	0.4	0.39	0.41			E2T2
	E2T3	47.8	46.8	44.8			E2T3	1.36	1.29	1.24			E2T3	65.008	60.372	55.552			E2T3	7.82	7.4175	7.13			E2T3	373.796	347.139	319.424			E2T3	0.39	0.35	0.41			E2T3	18.642	16.38	18.368			E2T3	0.42	0.43	0.45			E2T3
	E2T4	36.8	35.9	39.8			E2T4	1.25	1.2	1.18			E2T4	46	43.08	46.964			E2T4	7.1875	6.9	6.785			E2T4	264.5	247.71	270.043			E2T4	0.38	0.29	0.32			E2T4	13.984	10.411	12.736			E2T4	0.42	0.38	0.4			E2T4
	E2T5	36.5	45.6	42.5			E2T5	1.34	1.23	1.26			E2T5	48.91	56.088	53.55			E2T5	7.705	7.0725	7.245			E2T5	281.232	322.506	307.913			E2T5	0.32	0.32	0.31			E2T5	11.68	14.592	13.175			E2T5	0.41	0.41	0.4			E2T5
	E2T6	46.8	50.8	47.2			E2T6	1.36	1.38	1.28			E2T6	63.648	70.104	60.416			E2T6	7.82	7.935	7.36			E2T6	365.976	403.098	347.392			E2T6	0.36	0.33	0.38			E2T6	16.848	16.764	17.936			E2T6	0.48	0.42	0.47			E2T6
	E2T7	37.9	37.8	36.8			E2T7	1.26	1.24	1.18			E2T7	47.754	46.872	43.424			E2T7	7.245	7.13	6.785			E2T7	274.585	269.514	249.688			E2T7	0.32	0.3	0.37			E2T7	12.128	11.34	13.616			E2T7	0.41	0.39	0.46			E2T7
	E2T8	40.9	41.8	43.2			E2T8	1.23	1.25	1.23			E2T8	50.307	52.25	53.136			E2T8	7.0725	7.1875	7.0725			E2T8	289.265	300.438	305.532			E2T8	0.31	0.33	0.3			E2T8	12.679	13.794	12.96			E2T8	0.4	0.42	0.39			E2T8
	E2T9	34.8	37.6	35.2			E2T9	1.2	1.16	1.25			E2T9	41.76	43.616	44			E2T9	6.9	6.67	7.1875			E2T9	240.12	250.792	253			E2T9	0.32	0.28	0.31			E2T9	11.136	10.528	10.912			E2T9	0.37	0.37	0.4			E2T9
			Straw yield					Nitrogen content							N Uptake																	Phosphorous content							P Uptake					K content
								Straw							Straw																	Straw							Straw					Straw
	Treatments	R1	R2	R3			Treatments	R1	R2	R3			Treatments	R1	R2	R3															Treatments	R1	R2	R3			Treatments	R1	R2	R3			Treatments	R1	R2	R3			Treatments
	E1T1	37.4	36.8	40.8			E1T1	0.32	0.36	0.36			E1T1	11.968	13.248	14.688															E1T1	0.108	0.118	0.108			E1T1	4.0392	4.3424	4.4064			E1T1	1.32	1.36	1.51			E1T1
	E1T2	61.2	66.2	66.2			E1T2	0.43	0.44	0.48			E1T2	26.316	29.128	31.776															E1T2	0.185	0.218	0.194			E1T2	11.322	14.4316	12.8428			E1T2	1.61	1.61	1.6			E1T2
	E1T3	68.9	70.2	71.6			E1T3	0.48	0.48	0.55			E1T3	33.072	33.696	39.38															E1T3	0.209	0.214	0.219			E1T3	14.4001	15.0228	15.6804			E1T3	1.67	1.79	1.52			E1T3
	E1T4	61.6	59.5	64.5			E1T4	0.36	0.42	0.39			E1T4	22.176	24.99	25.155															E1T4	0.158	0.168	0.188			E1T4	9.7328	9.996	12.126			E1T4	1.6	1.48	1.63			E1T4
	E1T5	70.4	66.8	66.8			E1T5	0.49	0.47	0.52			E1T5	34.496	31.396	34.736															E1T5	0.204	0.199	0.207			E1T5	14.3616	13.2932	13.8276			E1T5	1.6	1.67	1.69			E1T5
	E1T6	71.2	77.1	67.6			E1T6	0.55	0.6	0.56			E1T6	39.16	46.26	37.856															E1T6	0.199	0.199	0.214			E1T6	14.1688	15.3429	14.4664			E1T6	1.69	1.77	1.71			E1T6
	E1T7	63.5	60.8	64.6			E1T7	0.41	0.37	0.42			E1T7	26.035	22.496	27.132															E1T7	0.196148	0.170108	0.196152			E1T7	12.4554	10.3426	12.6714			E1T7	1.67	1.6	1.56			E1T7
	E1T8	68.8	64.6	65.9			E1T8	0.458	0.44	0.47			E1T8	31.5104	28.424	30.973															E1T8	0.204	0.201	0.208			E1T8	14.0352	12.9846	13.7072			E1T8	1.73	1.64	1.65			E1T8
	E1T9	59.9	61.6	58.8			E1T9	0.41	0.37	0.38			E1T9	24.559	22.792	22.344															E1T9	0.179	0.185	0.187			E1T9	10.7221	11.396	10.9956			E1T9	1.41	1.46	1.48			E1T9
	E2T1	35.7	33.2	39.4			E2T1	0.27	0.34	0.35			E2T1	9.639	11.288	13.79															E2T1	0.109	0.105	0.104			E2T1	3.8913	3.486	4.0976			E2T1	1.31	1.46	1.41			E2T1
	E2T2	60.5	64.2	63.8			E2T2	0.41	0.4	0.43			E2T2	24.805	25.68	27.434															E2T2	0.169	0.179	0.165			E2T2	10.2245	11.4918	10.527			E2T2	1.58	1.63	1.51			E2T2
	E2T3	69.8	64.6	70.8			E2T3	0.48	0.5	0.49			E2T3	33.504	32.3	34.692															E2T3	0.179	0.185	0.176			E2T3	12.4942	11.951	12.4608			E2T3	1.69	1.62	1.57			E2T3
	E2T4	58.9	59.1	63.1			E2T4	0.4	0.3	0.39			E2T4	23.56	17.73	24.609															E2T4	0.169	0.159	0.179			E2T4	9.9541	9.3969	11.2949			E2T4	1.58	1.43	1.51			E2T4
	E2T5	63.5	69.2	66.8			E2T5	0.47	0.46	0.49			E2T5	29.845	31.832	32.732															E2T5	0.181	0.173	0.185732			E2T5	11.4935	11.9716	12.4069			E2T5	1.67	1.56	1.59			E2T5
	E2T6	71.6	73.2	66.5			E2T6	0.54	0.47	0.56			E2T6	38.664	34.404	37.24															E2T6	0.199	0.178756	0.229			E2T6	14.2484	13.0849	15.2285			E2T6	1.69	1.71	1.61			E2T6
	E2T7	61.8	63.6	58.8			E2T7	0.4	0.34	0.42			E2T7	24.72	21.624	24.696															E2T7	0.169	0.159	0.219			E2T7	10.4442	10.1124	12.8772			E2T7	1.59	1.46	1.51			E2T7
	E2T8	62.2	65.6	66.2			E2T8	0.42	0.42	0.44			E2T8	26.124	27.552	29.128															E2T8	0.159	0.179	0.169			E2T8	9.8898	11.7424	11.1878			E2T8	1.56	1.5	1.56			E2T8
	E2T9	59.8	58.5	55.7			E2T9	0.34	0.38	0.31			E2T9	20.332	22.23	17.267															E2T9	0.148	0.139	0.149			E2T9	8.8504	8.1315	8.2993			E2T9	1.5	1.49	1.48			E2T9
		2020							2020						2020						2020						2020						2020						2020						2020
		Grain yield							Nitrogen content						N Uptake						Protein content						Protein Yield						Phosphorous content						P Uptake						K content
									Grain						Grain						Grain						Grain						Grain						Grain						Grain
	Treatments	R1	R2	R3			Treatments	R1	R2	R3			Treatments	R1	R2	R3			Treatments	R1	R2	R3			Treatments	R1	R2	R3			Treatments	R1	R2	R3			Treatments	R1	R2	R3			Treatments	R1	R2	R3			Treatments
	E1T1	26.5	21.8	23.56			E1T1	1.17	1.15	1.19			E1T1	31.005	25.07	28.0364			E1T1	6.7275	6.6125	6.8425			E1T1	178.279	144.153	161.209			E1T1	0.32	0.27	0.29			E1T1	8.48	5.886	6.8324			E1T1	0.38	0.45	0.4			E1T1
	E1T2	39.56	43.6	44.5			E1T2	1.28	1.26	1.25			E1T2	50.6368	54.936	55.625			E1T2	7.36	7.245	7.1875			E1T2	291.162	315.882	319.844			E1T2	0.357148	0.4	0.395708			E1T2	14.1288	17.44	17.609			E1T2	0.46	0.46	0.49			E1T2
	E1T3	49.5	48.6	46.5			E1T3	1.32	1.34	1.35			E1T3	65.34	65.124	62.775			E1T3	7.59	7.705	7.7625			E1T3	375.705	374.463	360.956			E1T3	0.37	0.34	0.37			E1T3	18.315	16.524	17.205			E1T3	0.51	0.44	0.49			E1T3
	E1T4	39.6	38.9	36.8			E1T4	1.28	1.25	1.28			E1T4	50.688	48.625	47.104			E1T4	7.36	7.1875	7.36			E1T4	291.456	279.594	270.848			E1T4	0.34	0.35	0.37			E1T4	13.464	13.615	13.616			E1T4	0.41	0.46	0.43			E1T4
	E1T5	46.5	48.9	45.6			E1T5	1.27	1.32	1.35			E1T5	59.055	64.548	61.56			E1T5	7.3025	7.59	7.7625			E1T5	339.566	371.151	353.97			E1T5	0.387472	0.408556	0.411752			E1T5	18.0174	19.9784	18.7759			E1T5	0.497472	0.49	0.48			E1T5
	E1T6	52.6	50.8	48.9			E1T6	1.36	1.44	1.36			E1T6	71.536	73.152	66.504			E1T6	7.82	8.28	7.82			E1T6	411.332	420.624	382.398			E1T6	0.39	0.38	0.41			E1T6	20.514	19.304	20.049			E1T6	0.46	0.55	0.45			E1T6
	E1T7	39.8	39.4	40.8			E1T7	1.34	1.28	1.21			E1T7	53.332	50.432	49.368			E1T7	7.705	7.36	6.9575			E1T7	306.659	289.984	283.866			E1T7	0.378148	0.352108	0.378152			E1T7	15.0503	13.8731	15.4286			E1T7	0.47	0.41	0.43			E1T7
	E1T8	44.6	43.8	42.8			E1T8	1.32	1.25	1.27			E1T8	58.872	54.75	54.356			E1T8	7.59	7.1875	7.3025			E1T8	338.514	314.812	312.547			E1T8	0.39	0.4	0.39			E1T8	17.394	17.52	16.692			E1T8	0.5	0.49	0.48			E1T8
	E1T9	39.5	36.8	34.5			E1T9	1.24	1.28	1.25			E1T9	48.98	47.104	43.125			E1T9	7.13	7.36	7.1875			E1T9	281.635	270.848	247.969			E1T9	0.36	0.38	0.4			E1T9	14.22	13.984	13.8			E1T9	0.44	0.4	0.43			E1T9
	E2T1	20.1	22.6	26.5			E2T1	1.08	1.17	1.22			E2T1	21.708	26.442	32.33			E2T1	6.21	6.7275	7.015			E2T1	124.821	152.041	185.897			E2T1	0.39	0.33	0.09			E2T1	7.839	7.458	2.385			E2T1	0.38	0.34	0.26			E2T1
	E2T2	39.8	35.1	39.5			E2T2	1.26	1.35	1.18			E2T2	50.148	47.385	46.61			E2T2	7.245	7.7625	6.785			E2T2	288.351	272.464	268.007			E2T2	0.34	0.35	0.34			E2T2	13.532	12.285	13.43			E2T2	0.42	0.45	0.43			E2T2
	E2T3	48.95	49.5	44.5			E2T3	1.38	1.29	1.24			E2T3	67.551	63.855	55.18			E2T3	7.935	7.4175	7.13			E2T3	388.418	367.166	317.285			E2T3	0.4	0.38	0.42			E2T3	19.58	18.81	18.69			E2T3	0.51	0.45	0.48			E2T3
	E2T4	38.4	37.8	35.4			E2T4	1.25	1.22	1.18			E2T4	48	46.116	41.772			E2T4	7.1875	7.015	6.785			E2T4	276	265.167	240.189			E2T4	0.38	0.33	0.35			E2T4	14.592	12.474	12.39			E2T4	0.44	0.36	0.41			E2T4
	E2T5	37.5	47.5	43.5			E2T5	1.38	1.23	1.26			E2T5	51.75	58.425	54.81			E2T5	7.935	7.0725	7.245			E2T5	297.562	335.944	315.158			E2T5	0.361936	0.334132	0.356732			E2T5	13.5726	15.8713	15.5178			E2T5	0.45	0.5	0.42			E2T5
	E2T6	47.5	53.5	47.8			E2T6	1.36	1.4	1.28			E2T6	64.6	74.9	61.184			E2T6	7.82	8.05	7.36			E2T6	371.45	430.675	351.808			E2T6	0.37	0.349756	0.4			E2T6	17.575	18.7119	19.12			E2T6	0.5	0.5	0.49			E2T6
	E2T7	40.5	35.8	41.6			E2T7	1.28	1.22	1.18			E2T7	51.84	43.676	49.088			E2T7	7.36	7.015	6.785			E2T7	298.08	251.137	282.256			E2T7	0.34	0.33	0.39			E2T7	13.77	11.814	16.224			E2T7	0.41	0.4	0.42			E2T7
	E2T8	41.5	42.6	45.3			E2T8	1.25	1.27	1.23			E2T8	51.875	54.102	55.719			E2T8	7.1875	7.3025	7.0725			E2T8	298.281	311.087	320.384			E2T8	0.33	0.35	0.34			E2T8	13.695	14.91	15.402			E2T8	0.45	0.41	0.41			E2T8
	E2T9	35.6	38.6	34.5			E2T9	1.2	1.18	1.24			E2T9	42.72	45.548	42.78			E2T9	6.9	6.785	7.13			E2T9	245.64	261.901	245.985			E2T9	0.33	0.31	0.32			E2T9	11.748	11.966	11.04			E2T9	0.36	0.4	0.42			E2T9
															2019																								2019
		Straw yield						Nitrogen content							N Uptake																	Phosphorous content						P Uptake							K content
								Straw							straw																	Straw							straw					Straw
	Treatments	R1	R2	R3			Treatments	R1	R2	R3			Treatments	R1	R2	R3															Treatments	R1	R2	R3			Treatments	R1	R2	R3			Treatments	R1	R2	R3			Treatments
	E1T1	39.2	38.5	42.2			E1T1	0.34	0.42	0.4			E1T1	13.328	16.17	16.88															E1T1	0.102	0.117	0.107			E1T1	3.9984	4.5045	4.5154			E1T1	1.54	1.31	1.57			E1T1
	E1T2	65.5	64.1	66.5			E1T2	0.47	0.51	0.52			E1T2	30.785	32.691	34.58															E1T2	0.189	0.222	0.208			E1T2	12.3795	14.2302	13.832			E1T2	1.63	1.63	1.65			E1T2
	E1T3	69.2	71.8	73.8			E1T3	0.57	0.52	0.59			E1T3	39.444	37.336	43.542															E1T3	0.222	0.202	0.242			E1T3	15.3624	14.5036	17.8596			E1T3	1.75	1.54	1.85			E1T3
	E1T4	61.9	60.9	63.9			E1T4	0.4	0.48	0.43			E1T4	24.76	29.232	27.477															E1T4	0.162	0.172	0.192			E1T4	10.0278	10.4748	12.2688			E1T4	1.62	1.6	1.65			E1T4
	E1T5	70.2	68.9	67.8			E1T5	0.56	0.54	0.56			E1T5	39.312	37.206	37.968															E1T5	0.205	0.225	0.233752			E1T5	14.391	15.5025	15.8484			E1T5	1.62	1.77	1.71			E1T5
	E1T6	72.5	76.5	69.8			E1T6	0.61	0.64	0.6			E1T6	44.225	48.96	41.88															E1T6	0.212	0.202	0.232			E1T6	15.37	15.453	16.1936			E1T6	1.71	1.79	1.73			E1T6
	E1T7	65.2	62.5	65.2			E1T7	0.48	0.47	0.42			E1T7	31.296	29.375	27.384															E1T7	0.200148	0.174108	0.200152			E1T7	13.0496	10.8817	13.0499			E1T7	1.69	1.62	1.58			E1T7
	E1T8	70.8	62.9	68.8			E1T8	0.51	0.49	0.51			E1T8	36.108	30.821	35.088															E1T8	0.212	0.222	0.212			E1T8	15.0096	13.9638	14.5856			E1T8	1.77	1.6	1.63			E1T8
	E1T9	60.1	64.2	59.5			E1T9	0.45	0.41	0.42			E1T9	27.045	26.322	24.99															E1T9	0.175	0.202	0.222			E1T9	10.5175	12.9684	13.209			E1T9	1.67	1.62	1.54			E1T9
	E2T1	36.5	35.5	40.4			E2T1	0.31	0.41	0.36			E2T1	11.315	14.555	14.544															E2T1	0.105	0.105	0.112			E2T1	3.8325	3.7275	4.5248			E2T1	1.4	1.15	1.68			E2T1
	E2T2	63.6	64.1	62.5			E2T2	0.5	0.47	0.47			E2T2	31.8	30.127	29.375															E2T2	0.178	0.183	0.175			E2T2	11.3208	11.7303	10.9375			E2T2	1.61	1.66	1.54			E2T2
	E2T3	71.5	62.5	69.8			E2T3	0.55	0.54	0.53			E2T3	39.325	33.75	36.994															E2T3	0.184	0.173	0.195			E2T3	13.156	10.8125	13.611			E2T3	1.72	1.65	1.6			E2T3
	E2T4	61.5	58.5	62.5			E2T4	0.44	0.37	0.43			E2T4	27.06	21.645	26.875															E2T4	0.173	0.18	0.183			E2T4	10.6395	10.53	11.4375			E2T4	1.61	1.56	1.54			E2T4
	E2T5	63.6	71.7	67.9			E2T5	0.4	0.5	0.53			E2T5	25.44	35.85	35.987															E2T5	0.185	0.177	0.189732			E2T5	11.766	12.6909	12.8828			E2T5	1.7	1.59	1.62			E2T5
	E2T6	72.6	75.2	68.6			E2T6	0.6	0.56	0.63			E2T6	43.56	42.112	43.218															E2T6	0.203	0.182756	0.233			E2T6	14.7378	13.7433	15.9838			E2T6	1.82	1.54	1.68			E2T6
	E2T7	63.2	65.5	60.9			E2T7	0.46	0.37	0.46			E2T7	29.072	24.235	28.014															E2T7	0.173	0.163	0.223			E2T7	10.9336	10.6765	13.5807			E2T7	1.62	1.6	1.54			E2T7
	E2T8	62.8	70.9	67.1			E2T8	0.46	0.5	0.48			E2T8	28.888	35.45	32.208															E2T8	0.163	0.183	0.173			E2T8	10.2364	12.9747	11.6083			E2T8	1.59	1.63	1.59			E2T8
	E2T9	66.5	59.8	51.4			E2T9	0.41	0.45	0.36			E2T9	27.265	26.91	18.504															E2T9	0.163	0.143	0.153			E2T9	10.8395	8.5514	7.8642			E2T9	1.53	1.52	1.51			E2T9
		Nutrient applied
	N1	0
	N2	150
	N3	187.5
	N4	71.6
	N5	172.675	FYM	22.675	136.05
	N6	192.675	Azotobactor	20
	N7	135.175
	N8	155.175
	N9	156.05
			2019												2019
			Grain yield					Nutrient applied							Agronomic efficiency
	Treatments	R1	R2	R3			Treatments	R1	R2	R3			Treatments	R1	R2	R3
	E1T1	2650	2360	2156			E1T1	0	0	0			E1T1	0	0	0
	E1T2	3890	4220	4350			E1T2	150	150	150			E1T2	8.26667	12.4	14.6267
	E1T3	4860	4756	4580			E1T3	187.5	187.5	187.5			E1T3	11.7867	2.85867	1.22667
	E1T4	3860	3780	3620			E1T4	71.6	71.6	71.6			E1T4	16.8994	19.8324	20.4469
	E1T5	4580	4760	4450			E1T5	172.675	172.675	172.675			E1T5	11.1771	13.8989	13.2851
	E1T6	5180	4980	4780			E1T6	192.675	192.675	192.675			E1T6	13.1309	13.598	13.6188
	E1T7	4020	3950	3890			E1T7	135.175	135.175	135.175			E1T7	10.135	11.7625	12.8278
	E1T8	4350	4250	4190			E1T8	155.175	155.175	155.175			E1T8	10.9554	12.1798	13.1078
	E1T9	3650	3570	3480			E1T9	156.05	156.05	156.05			E1T9	6.4082	7.75393	8.48446
	E2T1	2650	1560	2260			E2T1	0	0	0			E2T1	0	0	0
	E2T2	3850	3640	3780			E2T2	150	150	150			E2T2	8	13.8667	10.1333
	E2T3	4780	4680	4480			E2T3	187.5	187.5	187.5			E2T3	11.36	5.54667	3.73333
	E2T4	3680	3590	3980			E2T4	71.6	71.6	71.6			E2T4	14.3855	28.352	24.0223
	E2T5	3650	4560	4250			E2T5	172.675	172.675	172.675			E2T5	5.79123	17.3737	11.5245
	E2T6	4680	5080	4720			E2T6	192.675	192.675	192.675			E2T6	10.5359	18.2691	12.7676
	E2T7	3790	3780	3680			E2T7	135.175	135.175	135.175			E2T7	8.43351	16.4232	10.5049
	E2T8	4090	4180	4320			E2T8	155.175	155.175	155.175			E2T8	9.27985	16.8842	13.2753
	E2T9	3480	3760	3520			E2T9	156.05	156.05	156.05			E2T9	5.31881	14.098	8.07434
			2020												2020
			Grain yield					Nutrient applied							Agronomic efficiency
	Treatments	R1	R2	R3			Treatments	R1	R2	R3			Treatments	R1	R2	R3
	E1T1	2650	2180	2356			E1T1	0	0	0			E1T1	0	0	0
	E1T2	3956	4360	4450			E1T2	150	150	150			E1T2	8.70667	14.5333	13.96
	E1T3	4950	4860	4650			E1T3	187.5	187.5	187.5			E1T3	12.2667	2.66667	1.06667
	E1T4	3960	3890	3680			E1T4	71.6	71.6	71.6			E1T4	18.2961	23.8827	18.4916
	E1T5	4650	4890	4560			E1T5	172.675	172.675	172.675			E1T5	11.5825	15.6942	12.7639
	E1T6	5260	5080	4890			E1T6	192.675	192.675	192.675			E1T6	13.5461	15.0513	13.1517
	E1T7	3980	3940	4080			E1T7	135.175	135.175	135.175			E1T7	9.8391	13.0202	12.7538
	E1T8	4460	4380	4280			E1T8	155.175	155.175	155.175			E1T8	11.6643	14.1775	12.3989
	E1T9	3950	3680	3450			E1T9	156.05	156.05	156.05			E1T9	8.33066	9.6123	7.01057
	E2T1	2010	2260	2650			E2T1	0	0	0			E2T1	0	0	0
	E2T2	3980	3510	3950			E2T2	150	150	150			E2T2	13.1333	8.33333	8.66667
	E2T3	4895	4950	4450			E2T3	187.5	187.5	187.5			E2T3	15.3867	7.68	2.66667
	E2T4	3840	3780	3540			E2T4	71.6	71.6	71.6			E2T4	25.5587	21.2291	12.4302
	E2T5	3750	4750	4350			E2T5	172.675	172.675	172.675			E2T5	10.0767	14.4202	9.84508
	E2T6	4750	5350	4780			E2T6	192.675	192.675	192.675			E2T6	14.2208	16.0374	11.0549
	E2T7	4050	3580	4160			E2T7	135.175	135.175	135.175			E2T7	15.0915	9.76512	11.1707
	E2T8	4150	4260	4530			E2T8	155.175	155.175	155.175			E2T8	13.7909	12.8887	12.1154
	E2T9	3560	3860	3450			E2T9	156.05	156.05	156.05			E2T9	9.93271	10.2531	5.12656
			2019												2019
			Grain yield					Nutrient applied							PFP
	Treatments	R1	R2	R3			Treatments	R1	R2	R3			Treatments	R1	R2	R3
	E1T1	2650	2360	2156			E1T1	0	0	0			E1T1	0	0	0
	E1T2	3890	4220	4350			E1T2	150	150	150			E1T2	25.9333	28.1333	29
	E1T3	4860	4756	4580			E1T3	187.5	187.5	187.5			E1T3	25.92	25.3653	24.4267
	E1T4	3860	3780	3620			E1T4	71.6	71.6	71.6			E1T4	53.9106	52.7933	50.5587
	E1T5	4580	4760	4450			E1T5	172.675	172.675	172.675			E1T5	26.5238	27.5662	25.771
	E1T6	5180	4980	4780			E1T6	192.675	192.675	192.675			E1T6	26.8847	25.8466	24.8086
	E1T7	4020	3950	3890			E1T7	135.175	135.175	135.175			E1T7	29.7392	29.2214	28.7775
	E1T8	4350	4250	4190			E1T8	155.175	155.175	155.175			E1T8	28.0329	27.3884	27.0018
	E1T9	3650	3570	3480			E1T9	156.05	156.05	156.05			E1T9	23.3899	22.8773	22.3005
	E2T1	2650	1560	2260			E2T1	0	0	0			E2T1	0	0	0
	E2T2	3850	3640	3780			E2T2	150	150	150			E2T2	25.6667	24.2667	25.2
	E2T3	4780	4680	4480			E2T3	187.5	187.5	187.5			E2T3	25.4933	24.96	23.8933
	E2T4	3680	3590	3980			E2T4	71.6	71.6	71.6			E2T4	51.3966	50.1397	55.5866
	E2T5	3650	4560	4250			E2T5	172.675	172.675	172.675			E2T5	21.138	26.408	24.6127
	E2T6	4680	5080	4720			E2T6	192.675	192.675	192.675			E2T6	24.2896	26.3656	24.4972
	E2T7	3790	3780	3680			E2T7	135.175	135.175	135.175			E2T7	28.0377	27.9638	27.224
	E2T8	4090	4180	4320			E2T8	155.175	155.175	155.175			E2T8	26.3573	26.9373	27.8395
	E2T9	3480	3760	3520			E2T9	156.05	156.05	156.05			E2T9	22.3005	24.0948	22.5569
			2020												2020
			Grain yield					Nutrient applied							PFP
	Treatments	R1	R2	R3			Treatments	R1	R2	R3			Treatments	R1	R2	R3
	E1T1	2650	2180	2356			E1T1	0	0	0			E1T1	0	0	0
	E1T2	3956	4360	4450			E1T2	150	150	150			E1T2	26.3733	29.0667	29.6667
	E1T3	4950	4860	4650			E1T3	187.5	187.5	187.5			E1T3	26.4	25.92	24.8
	E1T4	3960	3890	3680			E1T4	71.6	71.6	71.6			E1T4	55.3073	54.3296	51.3966
	E1T5	4650	4890	4560			E1T5	172.675	172.675	172.675			E1T5	26.9292	28.3191	26.408
	E1T6	5260	5080	4890			E1T6	192.675	192.675	192.675			E1T6	27.2999	26.3656	25.3795
	E1T7	3980	3940	4080			E1T7	135.175	135.175	135.175			E1T7	29.4433	29.1474	30.1831
	E1T8	4460	4380	4280			E1T8	155.175	155.175	155.175			E1T8	28.7417	28.2262	27.5818
	E1T9	3950	3680	3450			E1T9	156.05	156.05	156.05			E1T9	25.3124	23.5822	22.1083
	E2T1	2010	2260	2650			E2T1	0	0	0			E2T1	0	0	0
	E2T2	3980	3510	3950			E2T2	150	150	150			E2T2	26.5333	23.4	26.3333
	E2T3	4895	4950	4450			E2T3	187.5	187.5	187.5			E2T3	26.1067	26.4	23.7333
	E2T4	3840	3780	3540			E2T4	71.6	71.6	71.6			E2T4	53.6313	52.7933	49.4413
	E2T5	3750	4750	4350			E2T5	172.675	172.675	172.675			E2T5	21.7171	27.5083	25.1918
	E2T6	4750	5350	4780			E2T6	192.675	192.675	192.675			E2T6	24.6529	27.767	24.8086
	E2T7	4050	3580	4160			E2T7	135.175	135.175	135.175			E2T7	29.9612	26.4842	30.7749
	E2T8	4150	4260	4530			E2T8	155.175	155.175	155.175			E2T8	26.744	27.4529	29.1928
	E2T9	3560	3860	3450			E2T9	156.05	156.05	156.05			E2T9	22.8132	24.7357	22.1083
			2019					2019						2019
			Dry mt at harvest					N Uptake						PNUE
	Treatments	R1	R2	R3			Treatments	R1	R2	R3			Treatments	R1	R2	R3				Treatments	R1	R2	R3		Treatments	R1	R2	R3
	E1T1	6977.6	6997.5	7830.8			E1T1	42.973	40.152	39.6976			E1T1	0	0	0				E1T1	697.76	699.75	783.08		E1T1	6977.6	6997.5	7830.8
	E1T2	10064.5	10490.2	10010.6			E1T2	75.33	82.3	86.151			E1T2	95.4013	82.8675	46.9244				E1T2	1006.45	1049.02	1001.06		E1T2	10064.5	10490.2	10010.6
	E1T3	10877.6	10380.8	11000.6			E1T3	97.224	97.4264	99.836			E1T3	71.8881	59.0718	52.7084				E1T3	1087.76	1038.08	1100.06		E1T3	10877.6	10380.8	11000.6
	E1T4	9929.5	9683.9	9880.9			E1T4	70.426	71.484	71.491			E1T4	107.526	85.7398	64.4819				E1T4	992.95	968.39	988.09		E1T4	9929.5	9683.9	9880.9
	E1T5	10874.9	10673.9	10734.8			E1T5	91.746	94.228	94.366			E1T5	79.9069	67.9858	53.1203				E1T5	1087.49	1067.39	1073.48		E1T5	10874.9	10673.9	10734.8
	E1T6	11131.8	10860.8	11031.8			E1T6	108.572	116.976	102.864			E1T6	63.3272	50.2877	50.6757				E1T6	1113.18	1086.08	1103.18		E1T6	11131.8	10860.8	11031.8
	E1T7	9931.9	9783.5	10080.6			E1T7	79.099	71.871	74.201			E1T7	81.7777	87.8338	65.2052				E1T7	993.19	978.35	1008.06		E1T7	9931.9	9783.5	10080.6
	E1T8	10690.9	10533.9	10633.4			E1T8	87.1904	80.699	83.767			E1T8	83.9783	87.2173	63.5951				E1T8	1069.09	1053.39	1063.34		E1T8	10690.9	10533.9	10633.4
	E1T9	9860.7	9583.5	9877.8			E1T9	70.184	66.346	63.06			E1T9	105.953	98.7249	87.6194				E1T9	986.07	958.35	987.78		E1T9	9860.7	9583.5	9877.8
	E2T1	6125.2	6522.5	7512.5			E2T1	37.994	28.916	40.91			E2T1	0	0	0				E2T1	612.52	652.25	751.25		E2T1	6125.2	6522.5	7512.5
	E2T2	10215.4	9812.5	10038.5			E2T2	72.93	73	72.038			E2T2	117.077	74.6303	81.1488				E2T2	1021.54	981.25	1003.85		E2T2	10215.4	9812.5	10038.5
	E2T3	9711.5	10131.8	10811.8			E2T3	98.512	92.672	90.244			E2T3	59.2601	56.6111	66.8768				E2T3	971.15	1013.18	1081.18		E2T3	9711.5	10131.8	10811.8
	E2T4	9545.6	9515.8	9468.6			E2T4	69.56	60.81	71.573			E2T4	108.357	93.8515	63.7935				E2T4	954.56	951.58	946.86		E2T4	9545.6	9515.8	9468.6
	E2T5	9995.6	10612.9	9991.9			E2T5	78.755	87.92	86.282			E2T5	94.9535	69.3241	54.646				E2T5	999.56	1061.29	999.19		E2T5	9995.6	10612.9	9991.9
	E2T6	10315.8	10331.6	10818.5			E2T6	102.312	104.508	97.656			E2T6	65.1544	50.3903	58.2596				E2T6	1031.58	1033.16	1081.85		E2T6	10315.8	10331.6	10818.5
	E2T7	10615.8	9365.8	9805.6			E2T7	72.474	68.496	68.12			E2T7	130.238	71.8368	84.2742				E2T7	1061.58	936.58	980.56		E2T7	10615.8	9365.8	9805.6
	E2T8	10018.6	10301.6	10491.9			E2T8	76.431	79.802	82.264			E2T8	101.293	74.266	72.0462				E2T8	1001.86	1030.16	1049.19		E2T8	10018.6	10301.6	10491.9
	E2T9	9311.5	9315.9	9165.8			E2T9	62.092	65.846	61.267			E2T9	132.223	75.6404	81.2153				E2T9	931.15	931.59	916.58		E2T9	9311.5	9315.9	9165.8
			2020					2020						2020
			Dry mt at harvest					N Uptake						PNUE
	Treatments	R1	R2	R3			Treatments	R1	R2	R3			Treatments	R1	R2	R3				Treatments	R1	R2	R3		Treatments	R1	R2	R3
	E1T1	6102.9	7022.5	9102.6			E1T1	44.333	41.24	44.9164			E1T1	0	0	0				E1T1	6102.9	7022.5	9102.6		E1T1	61029	70225	91026
	E1T2	10725.8	10215.6	11265.8			E1T2	81.4218	87.627	90.205			E1T2	124.644	68.8361	47.7648				E1T2	10725.8	10215.6	11265.8		E1T2	107258	102156	112658
	E1T3	10058.6	10602.4	12165.8			E1T3	104.784	102.46	106.317			E1T3	65.4365	58.476	49.8888				E1T3	10058.6	10602.4	12165.8		E1T3	100586	106024	121658
	E1T4	10075.8	9855.8	10035.6			E1T4	75.448	77.857	74.581			E1T4	127.684	77.3766	31.4516				E1T4	10075.8	9855.8	10035.6		E1T4	100758	98558	100356
	E1T5	11012.5	10815.6	10889.5			E1T5	98.367	101.754	99.528			E1T5	90.8613	62.6814	32.7202				E1T5	11012.5	10815.6	10889.5		E1T5	110125	108156	108895
	E1T6	11285.6	11002.5	11185.9			E1T6	115.761	122.112	108.384			E1T6	72.5584	49.2136	32.8246				E1T6	11285.6	11002.5	11185.9		E1T6	112856	110025	111859
	E1T7	10075.8	10945.8	9402.5			E1T7	84.628	79.807	76.752			E1T7	98.5954	101.727	9.42027				E1T7	10075.8	10945.8	9402.5		E1T7	100758	109458	94025
	E1T8	10845.3	10675.8	10785.8			E1T8	94.98	85.571	89.444			E1T8	93.6363	82.4096	37.8013				E1T8	10845.3	10675.8	10785.8		E1T8	108453	106758	107858
	E1T9	10002.3	9722.5	10032.5			E1T9	76.025	73.426	68.115			E1T9	123.041	83.8874	40.0843				E1T9	10002.3	9722.5	10032.5		E1T9	100023	97225	100325
	E2T1	6179.8	6675.8	8075.8			E2T1	33.023	40.997	46.874			E2T1	0	0	0				E2T1	6179.8	6675.8	8075.8		E2T1	61798	66758	80758
	E2T2	9375.8	9725.8	11295.8			E2T2	81.948	77.512	75.985			E2T2	65.3245	83.5273	110.611				E2T2	9375.8	9725.8	11295.8		E2T2	93758	97258	112958
	E2T3	9832.5	10182.5	10842.5			E2T3	106.876	97.605	92.174			E2T3	49.4591	61.9471	61.0751				E2T3	9832.5	10182.5	10842.5		E2T3	98325	101825	108425
	E2T4	9332.5	10065.8	9305.8			E2T4	75.06	67.761	68.647			E2T4	74.9982	126.663	56.492				E2T4	9332.5	10065.8	9305.8		E2T4	93325	100658	93058
	E2T5	9922.5	10922.5	9945.9			E2T5	77.19	94.275	90.797			E2T5	84.7397	79.7083	42.5768				E2T5	9922.5	10922.5	9945.9		E2T5	99225	109225	99459
	E2T6	10895.8	9875.8	10865.8			E2T6	108.16	117.012	104.402			E2T6	62.7653	42.097	48.4981				E2T6	10895.8	9875.8	10865.8		E2T6	108958	98758	108658
	E2T7	10074.8	9415.8	9385.4			E2T7	80.912	67.911	77.102			E2T7	81.3339	101.806	43.3241				E2T7	10074.8	9415.8	9385.4		E2T7	100748	94158	93854
	E2T8	11052.5	9385.8	10542.5			E2T8	80.763	89.552	87.927			E2T8	102.067	55.813	60.0857				E2T8	11052.5	9385.8	10542.5		E2T8	110525	93858	105425
	E2T9	9552.5	9172.6	9215.8			E2T9	69.985	72.458	61.284			E2T9	91.2478	79.3617	79.1117				E2T9	9552.5	9172.6	9215.8		E2T9	95525	91726	92158
			2019					2019						2019
			Nutrient applied					N Uptake						ARE
	Treatments	R1	R2	R3			Treatments	R1	R2	R3			Treatments	R1	R2	R3
	E1T1	0	0	0			E1T1	42.973	40.152	39.6976			E1T1	0	0	0
	E1T2	150	150	150			E1T2	75.33	82.3	86.151			E1T2	21.5713	28.0987	30.9689
	E1T3	187.5	187.5	187.5			E1T3	97.224	97.4264	99.836			E1T3	28.9339	30.5463	32.0738
	E1T4	71.6	71.6	71.6			E1T4	70.426	71.484	71.491			E1T4	38.3422	43.7598	44.4042
	E1T5	172.675	172.675	172.675			E1T5	91.746	94.228	94.366			E1T5	28.2455	31.3166	31.6597
	E1T6	192.675	192.675	192.675			E1T6	108.572	116.976	102.864			E1T6	34.0465	39.8723	32.7839
	E1T7	135.175	135.175	135.175			E1T7	79.099	71.871	74.201			E1T7	26.7254	23.4651	25.525
	E1T8	155.175	155.175	155.175			E1T8	87.1904	80.699	83.767			E1T8	28.4952	26.1299	28.3998
	E1T9	156.05	156.05	156.05			E1T9	70.184	66.346	63.06			E1T9	17.4374	16.7856	14.9711
	E2T1	0	0	0			E2T1	37.994	28.916	40.91			E2T1	0	0	0
	E2T2	150	150	150			E2T2	72.93	73	72.038			E2T2	23.2907	29.3893	20.752
	E2T3	187.5	187.5	187.5			E2T3	98.512	92.672	90.244			E2T3	32.2763	34.0032	26.3115
	E2T4	71.6	71.6	71.6			E2T4	69.56	60.81	71.573			E2T4	44.0866	44.5447	42.8254
	E2T5	172.675	172.675	172.675			E2T5	78.755	87.92	86.282			E2T5	23.6056	34.1706	26.276
	E2T6	192.675	192.675	192.675			E2T6	102.312	104.508	97.656			E2T6	33.3816	39.2329	29.4517
	E2T7	135.175	135.175	135.175			E2T7	72.474	68.496	68.12			E2T7	25.5077	29.2806	20.1295
	E2T8	155.175	155.175	155.175			E2T8	76.431	79.802	82.264			E2T8	24.7701	32.7927	26.6499
	E2T9	156.05	156.05	156.05			E2T9	62.092	65.846	61.267			E2T9	15.4425	23.6655	13.0452
			2020					2020						2020
			Nutrient applied					N Uptake						ARE
	Treatments	R1	R2	R3			Treatments	R1	R2	R3			Treatments	R1	R2	R3
	E1T1	0	0	0			E1T1	44.333	41.24	44.9164			E1T1	0	0	0
	E1T2	150	150	150			E1T2	81.4218	87.627	90.205			E1T2	24.7259	30.9247	30.1924
	E1T3	187.5	187.5	187.5			E1T3	104.784	102.46	106.317			E1T3	32.2405	32.6507	32.747
	E1T4	71.6	71.6	71.6			E1T4	75.448	77.857	74.581			E1T4	43.4567	51.1411	41.431
	E1T5	172.675	172.675	172.675			E1T5	98.367	101.754	99.528			E1T5	31.2923	35.045	31.6268
	E1T6	192.675	192.675	192.675			E1T6	115.761	122.112	108.384			E1T6	37.0718	41.9733	32.9402
	E1T7	135.175	135.175	135.175			E1T7	84.628	79.807	76.752			E1T7	29.8095	28.5312	23.5514
	E1T8	155.175	155.175	155.175			E1T8	94.98	85.571	89.444			E1T8	32.6386	28.5684	28.6951
	E1T9	156.05	156.05	156.05			E1T9	76.025	73.426	68.115			E1T9	20.3089	20.6254	14.8661
	E2T1	0	0	0			E2T1	33.023	40.997	46.874			E2T1	0	0	0
	E2T2	150	150	150			E2T2	81.948	77.512	75.985			E2T2	32.6167	24.3433	19.4073
	E2T3	187.5	187.5	187.5			E2T3	106.876	97.605	92.174			E2T3	39.3883	30.1909	24.16
	E2T4	71.6	71.6	71.6			E2T4	75.06	67.761	68.647			E2T4	58.7109	37.3799	30.4092
	E2T5	172.675	172.675	172.675			E2T5	77.19	94.275	90.797			E2T5	25.5781	30.8545	25.4368
	E2T6	192.675	192.675	192.675			E2T6	108.16	117.012	104.402			E2T6	38.9968	39.4524	29.8575
	E2T7	135.175	135.175	135.175			E2T7	80.912	67.911	77.102			E2T7	35.4274	19.9105	22.3621
	E2T8	155.175	155.175	155.175			E2T8	80.763	89.552	87.927			E2T8	30.7653	31.2905	26.4559
	E2T9	156.05	156.05	156.05			E2T9	69.985	72.458	61.284			E2T9	23.686	20.1608	9.23422
[truncated: 3 more columns]

## Sheet: Nitrogen
		2019
		Nitrogen content
		Grain
Main factors	2
Sub factors	9	Total factors	18
Replications	3
Treatments	R1	R2	R3	Total	Mean									Factors Mean
E1T1	1.17	1.14	1.16	3.47	1.15667				ANOVA					1	1.26667	1
E1T2	1.26	1.26	1.25	3.77	1.25667		df	SS	MSS	Cal F	Table F	Result		2	1.24074	2
E1T3	1.32	1.34	1.32	3.98	1.32667	Replication	2	0.00471481	0.00235741	1.3036	3.2759	NS		SE.m	0.00818397
E1T4	1.25	1.23	1.28	3.76	1.25333	Treatment	17	0.189259	0.0111329	6.15626	1.93321	S	Factor A	CD	0.023521
E1T5	1.25	1.32	1.34	3.91	1.30333	Factor A	1	0.00907407	0.00907407	5.01777	4.13002	S		1	1.145	9	9
E1T6	1.34	1.42	1.36	4.12	1.37333	Factor B	8	381.65	47.7062	26380.5	2.22534	S		2	1.25	4	5
E1T7	1.32	1.25	1.21	3.78	1.26	A*B	8	-381.47	-47.6837	-26368.1	2.22534	NS		3	1.31167	2	2
E1T8	1.28	1.23	1.26	3.77	1.25667	Error	34	0.0614852	0.00180839					4	1.23167	7	7
E1T9	1.25	1.22	1.17	3.64	1.21333	Total	53	0.255459		t34=	2.03224			5	1.29	3	3
E2T1	1.07	1.13	1.2	3.4	1.13333	SE.m	0.0245519							6	1.35667	1	1
E2T2	1.25	1.3	1.18	3.73	1.24333	CD	0.0705629							7	1.24333	6	6
E2T3	1.36	1.29	1.24	3.89	1.29667	CV	3.39196							8	1.24667	5	4
E2T4	1.25	1.2	1.18	3.63	1.21									9	1.20833	8	8
E2T5	1.34	1.23	1.26	3.83	1.27667									SE.m	0.0173608
E2T6	1.36	1.38	1.28	4.02	1.34								Factor B	CD	0.0498955
E2T7	1.26	1.24	1.18	3.68	1.22667
E2T8	1.23	1.25	1.23	3.71	1.23667
E2T9	1.2	1.16	1.25	3.61	1.20333
Total	22.76	22.59	22.35	67.7	1.2537
Mean	1.26444	1.255	1.24167
CF	84.8757
TSSQ	0.255459	RSSQ	0.00471481
tSSQ	0.189259	ESSQ	0.0614852
		Nitrogen content
		Straw
Main factors	2
Sub factors	9	Total factors	18
Replications	3
Treatments	R1	R2	R3	Total	Mean									Factors Mean
E1T1	0.32	0.36	0.36	1.04	0.346667				ANOVA					1	0.444	1		1	0.494815
E1T2	0.43	0.44	0.48	1.35	0.45		df	SS	MSS	Cal F	Table F	Result		2	0.415556	2		2	0.471852
E1T3	0.48	0.48	0.55	1.51	0.503333	Replication	2	0.00642533	0.00321267	1.77654	3.2759	NS		SE.m	0.00553893			SE.m	0.00566878
E1T4	0.36	0.42	0.39	1.17	0.39	Treatment	17	0.245392	0.0144348	7.98215	1.93321	S	Factor A	CD	0.015919			CD	0.0162922
E1T5	0.49	0.47	0.52	1.48	0.493333	Factor A	1	0.0109227	0.0109227	6.04	4.13002	S		1	0.333333	9	9	1	0.381667
E1T6	0.55	0.6	0.56	1.71	0.57	Factor B	8	47.2711	5.90888	3267.49	2.22534	S		2	0.431667	5	5	2	0.49
E1T7	0.41	0.37	0.42	1.2	0.4	A*B	8	-47.0366	-5.87958	-3251.28	2.22534	NS		3	0.496667	2	2	3	0.55
E1T8	0.458	0.44	0.47	1.368	0.456	Error	34	0.028164	0.000828353					4	0.376667	7	7	4	0.425
E1T9	0.41	0.37	0.38	1.16	0.386667	Total	53	0.279981		t34=	2.03224			5	0.483333	3	3	5	0.536667
E2T1	0.27	0.34	0.35	0.96	0.32	SE.m	0.0166168							6	0.546667	1	1	6	0.606667
E2T2	0.41	0.4	0.43	1.24	0.413333	CD	0.0477571							7	0.393333	6	6	7	0.46
E2T3	0.48	0.5	0.49	1.47	0.49	CV	6.69674							8	0.441333	4	4	8	0.491667
E2T4	0.4	0.3	0.39	1.09	0.363333									9	0.365	8	8	9	0.408333
E2T5	0.47	0.46	0.49	1.42	0.473333									SE.m	0.0117498			SE.m	0.0120253
E2T6	0.54	0.47	0.56	1.57	0.523333								Factor B	CD	0.0337694			CD	0.034561
E2T7	0.4	0.34	0.42	1.16	0.386667
E2T8	0.42	0.42	0.44	1.28	0.426667
E2T9	0.34	0.38	0.31	1.03	0.343333
Total	7.638	7.56	8.01	23.208	0.429778
Mean	0.424333	0.42	0.445
CF	9.97428
TSSQ	0.279981	RSSQ	0.00642533
tSSQ	0.245392	ESSQ	0.028164
		Nitrogen uptake
		Grain
Main factors	2
Sub factors	9	Total factors	18
Replications	3
Treatments	R1	R2	R3	Total	Mean									Factors Mean
E1T1	31.005	26.904	25.0096	82.9186	27.6395				ANOVA					1	51.6259	1
E1T2	49.014	53.172	54.375	156.561	52.187		df	SS	MSS	Cal F	Table F	Result		2	48.369	2
E1T3	64.152	63.7304	60.456	188.338	62.7795	Replication	2	33.987	16.9935	9397.04	3.2759	S		SE.m	0.574613
E1T4	48.25	46.494	46.336	141.08	47.0267	Treatment	17	6774.44	398.496	220360	1.93321	S	Factor A	CD	1.65145
E1T5	57.25	62.832	59.63	179.712	59.904	Factor A	1	143.196	143.196	79184.1	4.13002	S		1	26.0036	9	9
E1T6	69.412	70.716	65.008	205.136	68.3787	Factor B	8	658385	82298.1	4.55091e+07	2.22534	S		2	49.435	5	5
E1T7	53.064	49.375	47.069	149.508	49.836	A*B	8	-651753	-81469.2	-4.50507e+07	2.22534	NS		3	61.5451	2	2
E1T8	55.68	52.275	52.794	160.749	53.583	Error	34	303.105	8.91485					4	46.1873	7	7
E1T9	45.625	43.554	40.716	129.895	43.2983	Total	53	7111.53		t34=	2.03224			5	56.3767	3	3
E2T1	28.355	17.628	27.12	73.103	24.3677	SE.m	1.72384							6	66.5507	1	1
E2T2	48.125	47.32	44.604	140.049	46.683	CD	4.95436							7	47.9263	6	6
E2T3	65.008	60.372	55.552	180.932	60.3107	CV	5.97186			3.25685				8	52.7403	4	4
E2T4	46	43.08	46.964	136.044	45.348									9	43.2118	8	8
E2T5	48.91	56.088	53.55	158.548	52.8493									SE.m	1.21894
E2T6	63.648	70.104	60.416	194.168	64.7227								Factor B	CD	3.50326
E2T7	47.754	46.872	43.424	138.05	46.0167
E2T8	50.307	52.25	53.136	155.693	51.8977
E2T9	41.76	43.616	44	129.376	43.1253
Total	913.319	906.382	880.16	2699.86	49.9974
Mean	50.7399	50.3546	48.8978
CF	134986
TSSQ	7111.53	RSSQ	33.987
tSSQ	6774.44	ESSQ	303.105
		Nitrogen uptake
		Straw
Main factors	2
Sub factors	9	Total factors	18
Replications	3
Treatments	R1	R2	R3	Total	Mean									Factors Mean
E1T1	11.968	13.248	14.688	39.904	13.3013				ANOVA					1	28.3616	1
E1T2	26.316	29.128	31.776	87.22	29.0733		df	SS	MSS	Cal F	Table F	Result		2	25.8304	2
E1T3	33.072	33.696	39.38	106.148	35.3827	Replication	2	27.0255	13.5127	7472.25	3.2759	S		SE.m	0.429005
E1T4	22.176	24.99	25.155	72.321	24.107	Treatment	17	3069.99	180.587	99861	1.93321	S	Factor A	CD	1.23297
E1T5	34.496	31.396	34.736	100.628	33.5427	Factor A	1	86.4916	86.4916	47828	4.13002	S		1	12.4368	9	9
E1T6	39.16	46.26	37.856	123.276	41.092	Factor B	8	202094	25261.7	1.39692e+07	2.22534	S		2	27.5232	5	5
E1T7	26.035	22.496	27.132	75.663	25.221	A*B	8	-199110	-24888.8	-1.3763e+07	2.22534	NS		3	34.4407	2	2
E1T8	31.5104	28.424	30.973	90.9074	30.3025	Error	34	168.954	4.96923					4	23.0367	7	7
E1T9	24.559	22.792	22.344	69.695	23.2317	Total	53	3265.96		t34=	2.03224			5	32.5062	3	3
E2T1	9.639	11.288	13.79	34.717	11.5723	SE.m	1.28702							6	38.9307	1	1
E2T2	24.805	25.68	27.434	77.919	25.973	CD	3.69892							7	24.4505	6	6
E2T3	33.504	32.3	34.692	100.496	33.4987	CV	8.22696							8	28.9519	4	4
E2T4	23.56	17.73	24.609	65.899	21.9663									9	21.5873	8	8
E2T5	29.845	31.832	32.732	94.409	31.4697									SE.m	0.910058
E2T6	38.664	34.404	37.24	110.308	36.7693								Factor B	CD	2.61553
E2T7	24.72	21.624	24.696	71.04	23.68
E2T8	26.124	27.552	29.128	82.804	27.6013
E2T9	20.332	22.23	17.267	59.829	19.943
Total	480.485	477.07	505.628	1463.18	27.096
Mean	26.6936	26.5039	28.0904
CF	39646.4
TSSQ	3265.96	RSSQ	27.0255
tSSQ	3069.99	ESSQ	168.954
		Nitrogen uptake
		Total
Main factors	2
Sub factors	9	Total factors	18
Replications	3
Treatments	R1	R2	R3	Total	Mean									Factors Mean
E1T1	42.973	40.152	39.6976	122.823	40.9409				ANOVA					1	79.9874	1
E1T2	75.33	82.3	86.151	243.781	81.2603		df	SS	MSS	Cal F	Table F	Result		2	74.1994	2
E1T3	97.224	97.4264	99.836	294.486	98.1621	Replication	2	3.27567	1.63783	905.688	3.2759	S		SE.m	0.767277
E1T4	70.426	71.484	71.491	213.401	71.1337	Treatment	17	18823.2	1107.25	612285	1.93321	S	Factor A	CD	2.20518
E1T5	91.746	94.228	94.366	280.34	93.4467	Factor A	1	452.265	452.265	250093	4.13002	S		1	38.4404	9	9
E1T6	108.572	116.976	102.864	328.412	109.471	Factor B	8	1.58863e+06	198579	1.0981e+08	2.22534	S		2	76.9582	5	5
E1T7	79.099	71.871	74.201	225.171	75.057	A*B	8	-1.57026e+06	-196283	-1.0854e+08	2.22534	NS		3	95.9857	2	2
E1T8	87.1904	80.699	83.767	251.656	83.8855	Error	34	540.44	15.8953					4	69.224	7	7
E1T9	70.184	66.346	63.06	199.59	66.53	Total	53	19366.9		t34=	2.03224			5	88.8828	3	3
E2T1	37.994	28.916	40.91	107.82	35.94	SE.m	2.30183							6	105.481	1	1
E2T2	72.93	73	72.038	217.968	72.656	CD	6.61553							7	72.3768	6	6
E2T3	98.512	92.672	90.244	281.428	93.8093	CV	5.17151							8	81.6922	4	4
E2T4	69.56	60.81	71.573	201.943	67.3143									9	64.7992	8	8
E2T5	78.755	87.92	86.282	252.957	84.319									SE.m	1.62764
E2T6	102.312	104.508	97.656	304.476	101.492								Factor B	CD	4.67789
E2T7	72.474	68.496	68.12	209.09	69.6967
E2T8	76.431	79.802	82.264	238.497	79.499
E2T9	62.092	65.846	61.267	189.205	63.0683
Total	1393.8	1383.45	1385.79	4163.04	77.0934
Mean	77.4336	76.8585	76.9882
CF	320943
TSSQ	19366.9	RSSQ	3.27567
tSSQ	18823.2	ESSQ	540.44
		2020
		Nitrogen content
		Grain
Main factors	2
Sub factors	9	Total factors	18
Replications	3
Treatments	R1	R2	R3	Total	Mean									Factors Mean
E1T1	1.17	1.15	1.19	3.51	1.17				ANOVA					1	1.2837	1
E1T2	1.28	1.26	1.25	3.79	1.26333		df	SS	MSS	Cal F	Table F	Result		2	1.25111	2
E1T3	1.32	1.34	1.35	4.01	1.33667	Replication	2	0.00757037	0.00378519	2.09313	3.2759	NS		SE.m	0.00928232
E1T4	1.28	1.25	1.28	3.81	1.27	Treatment	17	0.17877	0.0105159	5.81507	1.93321	S	Factor A	CD	0.0266777
E1T5	1.27	1.32	1.35	3.94	1.31333	Factor A	1	0.0143407	0.0143407	7.93012	4.13002	S		1	1.16333	9	9
E1T6	1.36	1.44	1.36	4.16	1.38667	Factor B	8	389.16	48.645	26899.6	2.22534	S		2	1.26333	5	5
E1T7	1.34	1.28	1.21	3.83	1.27667	A*B	8	-388.995	-48.6244	-26888.3	2.22534	NS		3	1.32	2	2
E1T8	1.32	1.25	1.27	3.84	1.28	Error	34	0.0790963	0.00232636					4	1.24333	7	7
E1T9	1.24	1.28	1.25	3.77	1.25667	Total	53	0.265437		t34=	2.03224			5	1.30167	3	3
E2T1	1.08	1.17	1.22	3.47	1.15667	SE.m	0.027847							6	1.36667	1	1
E2T2	1.26	1.35	1.18	3.79	1.26333	CD	0.080033							7	1.25167	6	6
E2T3	1.38	1.29	1.24	3.91	1.30333	CV	3.80559							8	1.265	4	4
E2T4	1.25	1.22	1.18	3.65	1.21667									9	1.23167	8	8
E2T5	1.38	1.23	1.26	3.87	1.29									SE.m	0.0196908
E2T6	1.36	1.4	1.28	4.04	1.34667								Factor B	CD	0.0565919
E2T7	1.28	1.22	1.18	3.68	1.22667
E2T8	1.25	1.27	1.23	3.75	1.25
E2T9	1.2	1.18	1.24	3.62	1.20667
Total	23.02	22.9	22.52	68.44	1.26741
Mean	1.27889	1.27222	1.25111
CF	86.7414
TSSQ	0.265437	RSSQ	0.00757037
tSSQ	0.17877	ESSQ	0.0790963
		Nitrogen content
		Straw
Main factors	2
Sub factors	9	Total factors	18
Replications	3
Treatments	R1	R2	R3	Total	Mean									Factors Mean
E1T1	0.34	0.42	0.4	1.16	0.386667				ANOVA					1	0.493333	1
E1T2	0.47	0.51	0.52	1.5	0.5		df	SS	MSS	Cal F	Table F	Result		2	0.464815	2
E1T3	0.57	0.52	0.59	1.68	0.56	Replication	2	0.000959259	0.00047963	0.265225	3.2759	NS		SE.m	0.0069838
E1T4	0.4	0.48	0.43	1.31	0.436667	Treatment	17	0.26792	0.01576	8.71496	1.93321	S	Factor A	CD	0.0200716
E1T5	0.56	0.54	0.56	1.66	0.553333	Factor A	1	0.0109796	0.0109796	6.0715	4.13002	S		1	0.373333	9	9
E1T6	0.61	0.64	0.6	1.85	0.616667	Factor B	8	58.2775	7.28469	4028.28	2.22534	S		2	0.49	5	5
E1T7	0.48	0.47	0.42	1.37	0.456667	A*B	8	-58.0206	-7.25257	-4010.52	2.22534	NS		3	0.55	2	2
E1T8	0.51	0.49	0.51	1.51	0.503333	Error	34	0.0447741	0.00131688					4	0.425	7	7
E1T9	0.45	0.41	0.42	1.28	0.426667	Total	53	0.313654		t34=	2.03224			5	0.515	3	3
E2T1	0.31	0.41	0.36	1.08	0.36	SE.m	0.0209514							6	0.606667	1	1
E2T2	0.5	0.47	0.47	1.44	0.48	CD	0.0602149							7	0.443333	6	6
E2T3	0.55	0.54	0.53	1.62	0.54	CV	7.5748							8	0.491667	4	4
E2T4	0.44	0.37	0.43	1.24	0.413333									9	0.416667	8	8
E2T5	0.4	0.5	0.53	1.43	0.476667									SE.m	0.0148149
E2T6	0.6	0.56	0.63	1.79	0.596667								Factor B	CD	0.0425784
E2T7	0.46	0.37	0.46	1.29	0.43
E2T8	0.46	0.5	0.48	1.44	0.48
E2T9	0.41	0.45	0.36	1.22	0.406667
Total	8.52	8.65	8.7	25.87	0.479074
Mean	0.473333	0.480556	0.483333
CF	12.3936
TSSQ	0.313654	RSSQ	0.000959259
tSSQ	0.26792	ESSQ	0.0447741
		Nitrogen uptake
		Grain
Main factors	2
Sub factors	9	Total factors	18
Replications	3
Treatments	R1	R2	R3	Total	Mean									Factors Mean
E1T1	31.005	25.07	28.0364	84.1114	28.0371				ANOVA					1	53.394	1
E1T2	50.6368	54.936	55.625	161.198	53.7326		df	SS	MSS	Cal F	Table F	Result		2	50.0042	2
E1T3	65.34	65.124	62.775	193.239	64.413	Replication	2	43.358	21.679	11988	3.2759	S		SE.m	0.671097
E1T4	50.688	48.625	47.104	146.417	48.8057	Treatment	17	7011.78	412.458	228080	1.93321	S	Factor A	CD	1.92875
E1T5	59.055	64.548	61.56	185.163	61.721	Factor A	1	155.127	155.127	85782	4.13002	S		1	27.4319	9	9
E1T6	71.536	73.152	66.504	211.192	70.3973	Factor B	8	701706	87713.2	4.85035e+07	2.22534	S		2	50.8901	5	5
E1T7	53.332	50.432	49.368	153.132	51.044	A*B	8	-694849	-86856.1	-4.80296e+07	2.22534	NS		3	63.3042	2	2
E1T8	58.872	54.75	54.356	167.978	55.9927	Error	34	413.44	12.16					4	47.0508	7	7
E1T9	48.98	47.104	43.125	139.209	46.403	Total	53	7468.58		t34=	2.03224			5	58.358	3	3
E2T1	21.708	26.442	32.33	80.48	26.8267	SE.m	2.01329							6	68.646	1	1
E2T2	50.148	47.385	46.61	144.143	48.0477	CD	5.78625							7	49.6227	6	6
E2T3	67.551	63.855	55.18	186.586	62.1953	CV	6.74503							8	54.9457	4	4
E2T4	48	46.116	41.772	135.888	45.296									9	45.0428	8	8
E2T5	51.75	58.425	54.81	164.985	54.995									SE.m	1.42361
E2T6	64.6	74.9	61.184	200.684	66.8947								Factor B	CD	4.0915
E2T7	51.84	43.676	49.088	144.604	48.2013
E2T8	51.875	54.102	55.719	161.696	53.8987
E2T9	42.72	45.548	42.78	131.048	43.6827
Total	939.637	944.19	907.926	2791.75	51.6991
Mean	52.202	52.455	50.4404
CF	144331
TSSQ	7468.58	RSSQ	43.358
tSSQ	7011.78	ESSQ	413.44
		Nitrogen uptake
		Straw
Main factors	2
Sub factors	9	Total factors	18
Replications	3
Treatments	R1	R2	R3	Total	Mean									Factors Mean
E1T1	13.328	16.17	16.88	46.378	15.4593				ANOVA					1	32.0076	1
E1T2	30.785	32.691	34.58	98.056	32.6853		df	SS	MSS	Cal F	Table F	Result		2	29.4103	2
E1T3	39.444	37.336	43.542	120.322	40.1073	Replication	2	0.834194	0.417097	230.646	3.2759	S		SE.m	0.571652
E1T4	24.76	29.232	27.477	81.469	27.1563	Treatment	17	3615.82	212.696	117616	1.93321	S	Factor A	CD	1.64294
E1T5	39.312	37.206	37.968	114.486	38.162	Factor A	1	91.0703	91.0703	50359.9	4.13002	S		1	14.4653	9	9
E1T6	44.225	48.96	41.88	135.065	45.0217	Factor B	8	256643	32080.4	1.77398e+07	2.22534	S		2	31.5597	5	5
E1T7	31.296	29.375	27.384	88.055	29.3517	A*B	8	-253118	-31639.8	-1.74961e+07	2.22534	NS		3	38.3985	2	2
E1T8	36.108	30.821	35.088	102.017	34.0057	Error	34	299.989	8.82321					4	26.1748	7	7
E1T9	27.045	26.322	24.99	78.357	26.119	Total	53	3916.65		t34=	2.03224			5	35.2938	3	3
E2T1	11.315	14.555	14.544	40.414	13.4713	SE.m	1.71496							6	43.9925	1	1
E2T2	31.8	30.127	29.375	91.302	30.434	CD	4.92883							7	28.2293	6	6
E2T3	39.325	33.75	36.994	110.069	36.6897	CV	9.67272							8	33.0938	4	4
E2T4	27.06	21.645	26.875	75.58	25.1933									9	25.1727	8	8
E2T5	25.44	35.85	35.987	97.277	32.4257									SE.m	1.21266
E2T6	43.56	42.112	43.218	128.89	42.9633								Factor B	CD	3.48521
E2T7	29.072	24.235	28.014	81.321	27.107
E2T8	28.888	35.45	32.208	96.546	32.182
E2T9	27.265	26.91	18.504	72.679	24.2263
Total	550.028	552.747	555.508	1658.28	30.7089
Mean	30.5571	30.7082	30.8616
CF	50924.1
TSSQ	3916.65	RSSQ	0.834194
tSSQ	3615.82	ESSQ	299.989
		Nitrogen uptake
		Total
Main factors	2
Sub factors	9	Total factors	18
Replications	3
Treatments	R1	R2	R3	Total	Mean									Factors Mean
E1T1	44.333	41.24	44.9164	130.489	43.4965				ANOVA					1	85.4016	1
E1T2	81.4218	87.627	90.205	259.254	86.4179		df	SS	MSS	Cal F	Table F	Result		2	79.4145	2
E1T3	104.784	102.46	106.317	313.561	104.52	Replication	2	34.5064	17.2532	9540.64	3.2759	S		SE.m	1.01375
E1T4	75.448	77.857	74.581	227.886	75.962	Treatment	17	20610.4	1212.38	670420	1.93321	S	Factor A	CD	2.91356
E1T5	98.367	101.754	99.528	299.649	99.883	Factor A	1	483.915	483.915	267595	4.13002	S		1	41.8972	9	9
E1T6	115.761	122.112	108.384	346.257	115.419	Factor B	8	1.8059e+06	225737	1.24828e+08	2.22534	S		2	82.4498	5	5
E1T7	84.628	79.807	76.752	241.187	80.3957	A*B	8	-1.78577e+06	-223221	-1.23437e+08	2.22534	NS		3	101.703	2	2
E1T8	94.98	85.571	89.444	269.995	89.9983	Error	34	943.428	27.7479					4	73.2257	7	7
E1T9	76.025	73.426	68.115	217.566	72.522	Total	53	21588.4		t34=	2.03224			5	93.6518	3	3
E2T1	33.023	40.997	46.874	120.894	40.298	SE.m	3.04126							6	112.638	1	1
E2T2	81.948	77.512	75.985	235.445	78.4817	CD	8.74068							7	77.852	6	6
E2T3	106.876	97.605	92.174	296.655	98.885	CV	6.39212							8	88.0395	4	4
E2T4	75.06	67.761	68.647	211.468	70.4893									9	70.2155	8	8
E2T5	77.19	94.275	90.797	262.262	87.4207									SE.m	2.1505
E2T6	108.16	117.012	104.402	329.574	109.858								Factor B	CD	6.18059
E2T7	80.912	67.911	77.102	225.925	75.3083
E2T8	80.763	89.552	87.927	258.242	86.0807
E2T9	69.985	72.458	61.284	203.727	67.909
Total	1489.66	1496.94	1463.43	4450.04	82.4081
Mean	82.7592	83.1632	81.3019
CF	366719
TSSQ	21588.4	RSSQ	34.5064
tSSQ	20610.4	ESSQ	943.428

## Sheet: Phosphorous
		2019
		Phosphorous content
		Grain
Main factors	2
Sub factors	9	Total factors	18
Replications	3
Treatments	R1	R2	R3	Total	Mean									Factors Mean
E1T1	0.29	0.27	0.29	0.85	0.283333				ANOVA					1	0.349801	1
E1T2	0.357148	0.36	0.38	1.09715	0.365716		df	SS	MSS	Cal F	Table F	Result		2	0.322593	2
E1T3	0.36	0.33	0.35	1.04	0.346667	Replication	2	0.00381626	0.00190813	2.09859	3.2759	NS		SE.m	0.00580307
E1T4	0.33	0.32	0.35	1	0.333333	Treatment	17	0.061736	0.00363153	3.99402	1.93321	S	Factor A	CD	0.0166782
E1T5	0.387472	0.38	0.37	1.13747	0.379157	Factor A	1	0.00999382	0.00999382	10.9914	4.13002	S		1	0.268333	9	9
E1T6	0.41	0.34	0.38	1.13	0.376667	Factor B	8	27.5903	3.44879	3793.03	2.22534	S		2	0.341191	5	5
E1T7	0.36	0.33	0.35	1.04	0.346667	A*B	8	-27.5385	-3.44232	-3785.92	2.22534	NS		3	0.365	2	2
E1T8	0.36	0.38	0.37	1.11	0.37	Error	34	0.0309142	0.000909242					4	0.331667	7	7
E1T9	0.35	0.31	0.38	1.04	0.346667	Total	53	0.0964665		t34=	2.03224			5	0.347912	3	3
E2T1	0.3	0.31	0.15	0.76	0.253333	SE.m	0.0174092							6	0.366667	1	1
E2T2	0.31	0.32	0.32	0.95	0.316667	CD	0.0500346							7	0.338333	6	6
E2T3	0.39	0.35	0.41	1.15	0.383333	CV	8.96905							8	0.341667	4	4
E2T4	0.38	0.29	0.32	0.99	0.33									9	0.325	8	8
E2T5	0.32	0.32	0.31	0.95	0.316667									SE.m	0.0123102
E2T6	0.36	0.33	0.38	1.07	0.356667								Factor B	CD	0.0353798
E2T7	0.32	0.3	0.37	0.99	0.33
E2T8	0.31	0.33	0.3	0.94	0.313333
E2T9	0.32	0.28	0.31	0.91	0.303333
Total	6.21462	5.85	6.09	18.1546	0.336197
Mean	0.345257	0.325	0.338333
CF	6.10352
TSSQ	0.0964665	RSSQ	0.00381626
tSSQ	0.061736	ESSQ	0.0309142
		P content
		Straw
Main factors	2
Sub factors	9	Total factors	18
Replications	3
Treatments	R1	R2	R3	Total	Mean									Factors Mean
E1T1	0.108	0.118	0.108	0.334	0.111333				ANOVA					1	0.186497	1		1	0.214414
E1T2	0.185	0.218	0.194	0.597	0.199		df	SS	MSS	Cal F	Table F	Result		2	0.167203	2		2	0.177132
E1T3	0.209	0.214	0.219	0.642	0.214	Replication	2	0.00107575	0.000537877	0.591566	3.2759	NS		SE.m	0.00229425			SE.m	0.00268542
E1T4	0.158	0.168	0.188	0.514	0.171333	Treatment	17	0.0462353	0.00271973	2.9912	1.93321	S	Factor A	CD	0.00659373			CD	0.00771797
E1T5	0.204	0.199	0.207	0.61	0.203333	Factor A	1	0.00502514	0.00502514	5.52674	4.13002	S		1	0.108667	9	9	1	0.128333
E1T6	0.199	0.199	0.214	0.612	0.204	Factor B	8	7.86267	0.982834	1080.94	2.22534	S		2	0.185	5	5	2	0.203833
E1T7	0.196148	0.170108	0.196152	0.562408	0.187469	A*B	8	-7.82146	-0.977682	-1075.27	2.22534	NS		3	0.197	2	2	3	0.205
E1T8	0.204	0.201	0.208	0.613	0.204333	Error	34	0.00483196	0.000142117					4	0.170167	7	7	4	0.186667
E1T9	0.179	0.185	0.187	0.551	0.183667	Total	53	0.0521431		t34=	2.03224			5	0.191622	3	3	5	0.216763
E2T1	0.109	0.105	0.104	0.318	0.106	SE.m	0.00688274							6	0.203126	1	1	6	0.223293
E2T2	0.169	0.179	0.165	0.513	0.171	CD	0.0197812							7	0.184901	6	6	7	0.201401
E2T3	0.179	0.185	0.176	0.54	0.18	CV	6.74089							8	0.186667	4	4	8	0.206667
E2T4	0.169	0.159	0.179	0.507	0.169									9	0.1645	8	8	9	0.19
E2T5	0.181	0.173	0.185732	0.539732	0.179911									SE.m	0.00486684			SE.m	0.00569663
E2T6	0.199	0.178756	0.229	0.606756	0.202252								Factor B	CD	0.0139874			CD	0.0163723
E2T7	0.169	0.159	0.219	0.547	0.182333
E2T8	0.159	0.179	0.169	0.507	0.169
E2T9	0.148	0.139	0.149	0.436	0.145333
Total	3.12415	3.12886	3.29688	9.5499	0.17685
Mean	0.173564	0.173826	0.18316
CF	1.6889
TSSQ	0.0521431	RSSQ	0.00107575
tSSQ	0.0462353	ESSQ	0.00483196
		P uptake
		Grain
Main factors	2
Sub factors	9	Total factors	18
Replications	3
Treatments	R1	R2	R3	Total	Mean									Factors Mean
E1T1	7.685	6.372	6.2524	20.3094	6.7698				ANOVA					1	14.3253	1
E1T2	13.8931	15.192	16.53	45.6151	15.205		df	SS	MSS	Cal F	Table F	Result		2	12.6839	2
E1T3	17.496	15.6948	16.03	49.2208	16.4069	Replication	2	6.9303	3.46515	3811.03	3.2759	S		SE.m	0.219614
E1T4	12.738	12.096	12.67	37.504	12.5013	Treatment	17	652.849	38.4029	42236.2	1.93321	S	Factor A	CD	0.631176
E1T5	17.7462	18.088	16.465	52.2992	17.4331	Factor A	1	36.3744	36.3744	40005.2	4.13002	S		1	6.0809	9	9
E1T6	21.238	16.932	18.164	56.334	18.778	Factor B	8	48696.4	6087.05	6.69464e+06	2.22534	S		2	13.549	5	5
E1T7	14.472	13.035	13.615	41.122	13.7073	A*B	8	-48079.9	-6009.99	-6.60989e+06	2.22534	NS		3	17.1018	2	2
E1T8	15.66	16.15	15.503	47.313	15.771	Error	34	44.2754	1.30222					4	12.4392	7	7
E1T9	12.775	11.067	13.224	37.066	12.3553	Total	53	704.055		t34=	2.03224			5	15.291	3	3
E2T1	7.95	4.836	3.39	16.176	5.392	SE.m	0.658841							6	17.9803	1	1
E2T2	11.935	11.648	12.096	35.679	11.893	CD	1.89353							7	13.0343	6	6
E2T3	18.642	16.38	18.368	53.39	17.7967	CV	8.45007							8	14.4577	4	4
E2T4	13.984	10.411	12.736	37.131	12.377									9	11.607	8	8
E2T5	11.68	14.592	13.175	39.447	13.149									SE.m	0.465871
E2T6	16.848	16.764	17.936	51.548	17.1827								Factor B	CD	1.33893
E2T7	12.128	11.34	13.616	37.084	12.3613
E2T8	12.679	13.794	12.96	39.433	13.1443
E2T9	11.136	10.528	10.912	32.576	10.8587
Total	250.685	234.92	243.642	729.247	13.5046
Mean	13.927	13.0511	13.5357
CF	9848.18
TSSQ	704.055	RSSQ	6.9303
tSSQ	652.849	ESSQ	44.2754
		P uptake
		Straw
Main factors	2
Sub factors	9	Total factors	18
Replications	3
Treatments	R1	R2	R3	Total	Mean									Factors Mean
E1T1	4.0392	4.3424	4.4064	12.788	4.26267				ANOVA					1	11.9672	1
E1T2	11.322	14.4316	12.8428	38.5964	12.8655		df	SS	MSS	Cal F	Table F	Result		2	10.4163	2
E1T3	14.4001	15.0228	15.6804	45.1033	15.0344	Replication	2	4.97019	2.48509	2733.15	3.2759	S		SE.m	0.155402
E1T4	9.7328	9.996	12.126	31.8548	10.6183	Treatment	17	494.719	29.1011	32005.9	1.93321	S	Factor A	CD	0.446631
E1T5	14.3616	13.2932	13.8276	41.4824	13.8275	Factor A	1	32.4712	32.4712	35712.4	4.13002	S		1	4.04382	9	9
E1T6	14.1688	15.3429	14.4664	43.9781	14.6594	Factor B	8	33673.1	4209.14	4.62928e+06	2.22534	S		2	11.8066	5	5
E1T7	12.4554	10.3426	12.6714	35.4694	11.8231	A*B	8	-33210.8	-4151.35	-4.56573e+06	2.22534	NS		3	13.6682	2	2
E1T8	14.0352	12.9846	13.7072	40.727	13.5757	Error	34	22.1696	0.652048					4	10.4168	7	7
E1T9	10.7221	11.396	10.9956	33.1137	11.0379	Total	53	521.859		t34=	2.03224			5	12.8924	3	3
E2T1	3.8913	3.486	4.0976	11.4749	3.82497	SE.m	0.466207							6	14.4233	1	1
E2T2	10.2245	11.4918	10.527	32.2433	10.7478	CD	1.33989							7	11.4839	6	6
E2T3	12.4942	11.951	12.4608	36.906	12.302	CV	7.21512							8	12.2578	4	4
E2T4	9.9541	9.3969	11.2949	30.6459	10.2153									9	9.73248	8	8
E2T5	11.4935	11.9716	12.4069	35.872	11.9573									SE.m	0.329658
E2T6	14.2484	13.0849	15.2285	42.5618	14.1873								Factor B	CD	0.947447
E2T7	10.4442	10.1124	12.8772	33.4338	11.1446
E2T8	9.8898	11.7424	11.1878	32.82	10.94
E2T9	8.8504	8.1315	8.2993	25.2812	8.42707
Total	196.728	198.521	209.104	604.352	11.1917
Mean	10.9293	11.0289	11.6169
CF	6763.73
TSSQ	521.859	RSSQ	4.97019
tSSQ	494.719	ESSQ	22.1696
		P uptake
		Total
Main factors	2
Sub factors	9	Total factors	18
Replications	3
Treatments	R1	R2	R3	Total	Mean									Factors Mean
E1T1	11.7242	10.7144	10.6588	33.0974	11.0325				ANOVA					1	26.2925	1
E1T2	25.2151	29.6236	29.3728	84.2115	28.0705		df	SS	MSS	Cal F	Table F	Result		2	23.1001	2
E1T3	31.8961	30.7176	31.7104	94.3241	31.4414	Replication	2	11.0442	5.52212	6073.32	3.2759	S		SE.m	0.298894
E1T4	22.4708	22.092	24.796	69.3588	23.1196	Treatment	17	2228.4	131.083	144167	1.93321	S	Factor A	CD	0.85903
E1T5	32.1078	31.3812	30.2926	93.7816	31.2605	Factor A	1	137.58	137.58	151313	4.13002	S		1	10.1247	9	9
E1T6	35.4068	32.2749	32.6304	100.312	33.4374	Factor B	8	163253	20406.6	2.24436e+07	2.22534	S		2	25.3556	5	5
E1T7	26.9274	23.3776	26.2864	76.5914	25.5305	A*B	8	-161162	-20145.3	-2.21561e+07	2.22534	NS		3	30.77	2	2
E1T8	29.6952	29.1346	29.2102	88.04	29.3467	Error	34	82.012	2.41212					4	22.8559	7	7
E1T9	23.4971	22.463	24.2196	70.1797	23.3932	Total	53	2321.46		t34=	2.03224			5	28.1834	3	3
E2T1	11.8413	8.322	7.4876	27.6509	9.21697	SE.m	0.896682							6	32.4037	1	1
E2T2	22.1595	23.1398	22.623	67.9223	22.6408	CD	2.57709							7	24.5182	6	6
E2T3	31.1362	28.331	30.8288	90.296	30.0987	CV	6.2888							8	26.7155	4	4
E2T4	23.9381	19.8079	24.0309	67.7769	22.5923									9	21.3395	8	8
E2T5	23.1735	26.5636	25.5819	75.319	25.1063									SE.m	0.63405
E2T6	31.0964	29.8489	33.1645	94.1098	31.3699								Factor B	CD	1.82228
E2T7	22.5722	21.4524	26.4932	70.5178	23.5059
E2T8	22.5688	25.5364	24.1478	72.253	24.0843
E2T9	19.9864	18.6595	19.2113	57.8572	19.2857
Total	447.413	433.44	452.746	1333.6	24.6963
Mean	24.8563	24.08	25.1526
CF	32935
TSSQ	2321.46	RSSQ	11.0442
tSSQ	2228.4	ESSQ	82.012
		2020
		P content
		Grain
Main factors	2
Sub factors	9	Total factors	18
Replications	3
Treatments	R1	R2	R3	Total	Mean									Factors Mean
E1T1	0.32	0.27	0.29	0.88	0.293333				ANOVA					1	0.369965	1
E1T2	0.357148	0.4	0.395708	1.15286	0.384285		df	SS	MSS	Cal F	Table F	Result		2	0.344909	2
E1T3	0.37	0.34	0.37	1.08	0.36	Replication	2	0.00101545	0.000507724	0.558403	3.2759	NS		SE.m	0.00817032
E1T4	0.34	0.35	0.37	1.06	0.353333	Treatment	17	0.065433	0.003849	4.2332	1.93321	S	Factor A	CD	0.0234817
E1T5	0.387472	0.408556	0.411752	1.20778	0.402593	Factor A	1	0.00847474	0.00847474	9.32067	4.13002	S		1	0.281667	9	9
E1T6	0.39	0.38	0.41	1.18	0.393333	Factor B	8	31.0907	3.88634	4274.27	2.22534	S		2	0.363809	5	5
E1T7	0.378148	0.352108	0.378152	1.10841	0.369469	A*B	8	-31.0338	-3.87922	-4266.44	2.22534	NS		3	0.38	2	2
E1T8	0.39	0.4	0.39	1.18	0.393333	Error	34	0.0612804	0.00180236					4	0.353333	7	7
E1T9	0.36	0.38	0.4	1.14	0.38	Total	53	0.127729		t34=	2.03224			5	0.376763	3	3
E2T1	0.39	0.33	0.09	0.81	0.27	SE.m	0.024511							6	0.383293	1	1
E2T2	0.34	0.35	0.34	1.03	0.343333	CD	0.0704452							7	0.361401	6	6
E2T3	0.4	0.38	0.42	1.2	0.4	CV	11.8774							8	0.366667	4	4
E2T4	0.38	0.33	0.35	1.06	0.353333									9	0.35	8	8
E2T5	0.361936	0.334132	0.356732	1.0528	0.350933									SE.m	0.0173319
E2T6	0.37	0.349756	0.4	1.11976	0.373252								Factor B	CD	0.0498123
E2T7	0.34	0.33	0.39	1.06	0.353333
E2T8	0.33	0.35	0.34	1.02	0.34
E2T9	0.33	0.31	0.32	0.96	0.32
Total	6.5347	6.34455	6.42234	19.3016	0.357437
Mean	0.363039	0.352475	0.356797
CF	6.89911
TSSQ	0.127729	RSSQ	0.00101545
tSSQ	0.065433	ESSQ	0.0612804
		P content
		Straw
Main factors	2
Sub factors	9	Total factors	18
Replications	3
Treatments	R1	R2	R3	Total	Mean									Factors Mean
E1T1	0.102	0.117	0.107	0.326	0.108667				ANOVA					1	0.195043	1
E1T2	0.189	0.222	0.208	0.619	0.206333		df	SS	MSS	Cal F	Table F	Result		2	0.172351	2
E1T3	0.222	0.202	0.242	0.666	0.222	Replication	2	0.00268577	0.00134288	1.47693	3.2759	NS		SE.m	0.00254938
E1T4	0.162	0.172	0.192	0.526	0.175333	Treatment	17	0.0565831	0.00332842	3.66065	1.93321	S	Factor A	CD	0.00732698
E1T5	0.205	0.225	0.233752	0.663752	0.221251	Factor A	1	0.00695124	0.00695124	7.64509	4.13002	S		1	0.108	9	9
E1T6	0.212	0.202	0.232	0.646	0.215333	Factor B	8	8.44849	1.05606	1161.47	2.22534	S		2	0.1925	5	5
E1T7	0.200148	0.174108	0.200152	0.574408	0.191469	A*B	8	-8.39886	-1.04986	-1154.65	2.22534	NS		3	0.203	2	2
E1T8	0.212	0.222	0.212	0.646	0.215333	Error	34	0.00596637	0.000175482					4	0.177	7	7
E1T9	0.175	0.202	0.222	0.599	0.199667	Total	53	0.0652352		t34=	2.03224			5	0.202581	3	3
E2T1	0.105	0.105	0.112	0.322	0.107333	SE.m	0.00764813							6	0.210793	1	1
E2T2	0.178	0.183	0.175	0.536	0.178667	CD	0.0219809							7	0.188901	6	6
E2T3	0.184	0.173	0.195	0.552	0.184	CV	7.21129							8	0.194167	4	4
E2T4	0.173	0.18	0.183	0.536	0.178667									9	0.176333	8	8
E2T5	0.185	0.177	0.189732	0.551732	0.183911									SE.m	0.00540804
E2T6	0.203	0.182756	0.233	0.618756	0.206252								Factor B	CD	0.0155429
E2T7	0.173	0.163	0.223	0.559	0.186333
E2T8	0.163	0.183	0.173	0.519	0.173
E2T9	0.163	0.143	0.153	0.459	0.153
Total	3.20615	3.22786	3.48564	9.91965	0.183697
Mean	0.178119	0.179326	0.193646
CF	1.82221
TSSQ	0.0652352	RSSQ	0.00268577
tSSQ	0.0565831	ESSQ	0.00596637
		P uptake
		Grain
Main factors	2
Sub factors	9	Total factors	18
Replications	3
Treatments	R1	R2	R3	Total	Mean									Factors Mean
E1T1	8.48	5.886	6.8324	21.1984	7.06613				ANOVA					1	15.471	1
E1T2	14.1288	17.44	17.609	49.1778	16.3926		df	SS	MSS	Cal F	Table F	Result		2	13.8668	2
E1T3	18.315	16.524	17.205	52.044	17.348	Replication	2	0.262848	0.131424	144.542	3.2759	S		SE.m	0.247525
E1T4	13.464	13.615	13.616	40.695	13.565	Treatment	17	742.496	43.6762	48035.9	1.93321	S	Factor A	CD	0.711393
E1T5	18.0174	19.9784	18.7759	56.7717	18.9239	Factor A	1	34.7414	34.7414	38209.1	4.13002	S		1	6.48007	9	9
E1T6	20.514	19.304	20.049	59.867	19.9557	Factor B	8	57228.5	7153.56	7.86761e+06	2.22534	S		2	14.7375	5	5
E1T7	15.0503	13.8731	15.4286	44.3519	14.784	A*B	8	-56520.7	-7065.09	-7.77031e+06	2.22534	NS		3	18.1873	2	2
E1T8	17.394	17.52	16.692	51.606	17.202	Error	34	56.2444	1.65425					4	13.3585	7	7
E1T9	14.22	13.984	13.8	42.004	14.0013	Total	53	799.003		t34=	2.03224			5	16.9556	3	3
E2T1	7.839	7.458	2.385	17.682	5.894	SE.m	0.742574							6	19.2123	1	1
E2T2	13.532	12.285	13.43	39.247	13.0823	CD	2.13418							7	14.36	6	6
E2T3	19.58	18.81	18.69	57.08	19.0267	CV	8.76807							8	15.9355	4	4
E2T4	14.592	12.474	12.39	39.456	13.152									9	12.793	8	8
E2T5	13.5726	15.8713	15.5178	44.9617	14.9872									SE.m	0.525079
E2T6	17.575	18.7119	19.12	55.4069	18.469								Factor B	CD	1.50909
E2T7	13.77	11.814	16.224	41.808	13.936
E2T8	13.695	14.91	15.402	44.007	14.669
E2T9	11.748	11.966	11.04	34.754	11.5847
Total	265.487	262.425	264.207	792.119	14.6689
Mean	14.7493	14.5791	14.6782
CF	11619.5
TSSQ	799.003	RSSQ	0.262848
tSSQ	742.496	ESSQ	56.2444
		P uptake
		Straw
Main factors	2
Sub factors	9	Total factors	18
Replications	3
Treatments	R1	R2	R3	Total	Mean									Factors Mean
E1T1	3.9984	4.5045	4.5154	13.0183	4.33943				ANOVA					1	12.7389	1
E1T2	12.3795	14.2302	13.832	40.4417	13.4806		df	SS	MSS	Cal F	Table F	Result		2	10.9381	2
E1T3	15.3624	14.5036	17.8596	47.7256	15.9085	Replication	2	9.54323	4.77161	5247.9	3.2759	S		SE.m	0.191916
E1T4	10.0278	10.4748	12.2688	32.7714	10.9238	Treatment	17	569.464	33.4979	36841.5	1.93321	S	Factor A	CD	0.551572
E1T5	14.391	15.5025	15.8484	45.7419	15.2473	Factor A	1	43.7777	43.7777	48147.5	4.13002	S		1	4.18385	9	9
E1T6	15.37	15.453	16.1936	47.0166	15.6722	Factor B	8	37458.2	4682.27	5.14964e+06	2.22534	S		2	12.405	5	5
E1T7	13.0496	10.8817	13.0499	36.9813	12.3271	A*B	8	-36932.5	-4616.56	-5.07738e+06	2.22534	NS		3	14.2175	2	2
E1T8	15.0096	13.9638	14.5856	43.559	14.5197	Error	34	33.8116	0.994459					4	10.8964	7	7
E1T9	10.5175	12.9684	13.209	36.6949	12.2316	Total	53	612.819		t34=	2.03224			5	13.8469	3	3
E2T1	3.8325	3.7275	4.5248	12.0848	4.02827	SE.m	0.575749							6	15.2469	1	1
E2T2	11.3208	11.7303	10.9375	33.9886	11.3295	CD	1.65472							7	12.0287	6	6
E2T3	13.156	10.8125	13.611	37.5795	12.5265	CV	8.42356							8	13.0631	4	4
E2T4	10.6395	10.53	11.4375	32.607	10.869									9	10.6583	8	8
E2T5	11.766	12.6909	12.8828	37.3397	12.4466									SE.m	0.407116
E2T6	14.7378	13.7433	15.9838	44.4649	14.8216								Factor B	CD	1.17006
E2T7	10.9336	10.6765	13.5807	35.1908	11.7303
E2T8	10.2364	12.9747	11.6083	34.8194	11.6065
E2T9	10.8395	8.5514	7.8642	27.2551	9.08503
Total	207.568	207.92	223.793	639.28	11.8385
Mean	11.5316	11.5511	12.4329
CF	7568.14
TSSQ	612.819	RSSQ	9.54323
tSSQ	569.464	ESSQ	33.8116
		P uptake
		Total
Main factors	2
Sub factors	9	Total factors	18
Replications	3
Treatments	R1	R2	R3	Total	Mean									Factors Mean
E1T1	12.4784	10.3905	11.3478	34.2167	11.4056				ANOVA					1	28.2099	1
E1T2	26.5083	31.6702	31.441	89.6195	29.8732		df	SS	MSS	Cal F	Table F	Result		2	24.8049	2
E1T3	33.6774	31.0276	35.0646	99.7696	33.2565	Replication	2	10.0445	5.02223	5523.54	3.2759	S		SE.m	0.356696
E1T4	23.4918	24.0898	25.8848	73.4664	24.4888	Treatment	17	2554.12	150.243	165239	1.93321	S	Factor A	CD	1.02515
E1T5	32.4084	35.4809	34.6243	102.514	34.1712	Factor A	1	156.516	156.516	172139	4.13002	S		1	10.6639	9	9
E1T6	35.884	34.757	36.2426	106.884	35.6279	Factor B	8	187201	23400.1	2.57358e+07	2.22534	S		2	27.1425	5	5
E1T7	28.0999	24.7548	28.4785	81.3333	27.1111	A*B	8	-184803	-23100.4	-2.54062e+07	2.22534	NS		3	32.4048	2	2
E1T8	32.4036	31.4838	31.2776	95.165	31.7217	Error	34	116.799	3.43526					4	24.2549	7	7
E1T9	24.7375	26.9524	27.009	78.6989	26.233	Total	53	2680.97		t34=	2.03224			5	30.8025	3	3
E2T1	11.6715	11.1855	6.9098	29.7668	9.92227	SE.m	1.07009							6	34.4592	1	1
E2T2	24.8528	24.0153	24.3675	73.2356	24.4119	CD	3.07546							7	26.3887	6	6
E2T3	32.736	29.6225	32.301	94.6595	31.5532	CV	6.99219							8	28.9986	4	4
E2T4	25.2315	23.004	23.8275	72.063	24.021									9	23.4513	8	8
E2T5	25.3386	28.5622	28.4006	82.3014	27.4338									SE.m	0.756666
E2T6	32.3128	32.4552	35.1038	99.8718	33.2906								Factor B	CD	2.17468
E2T7	24.7036	22.4905	29.8047	76.9988	25.6663
E2T8	23.9314	27.8847	27.0103	78.8264	26.2755
E2T9	22.5875	20.5174	18.9042	62.0091	20.6697
Total	473.055	470.344	488	1431.4	26.5074
Mean	26.2808	26.1302	27.1111
CF	37942.6
TSSQ	2680.97	RSSQ	10.0445
tSSQ	2554.12	ESSQ	116.799

## Sheet: Potassium
		2019
		K content
		Grain
Main factors	2
Sub factors	9	Total factors	18
Replications	3
Treatments	R1	R2	R3	Total	Mean									Factors Mean
E1T1	0.36	0.38	0.34	1.08	0.36				ANOVA					1	0.433875	1
E1T2	0.447148	0.46	0.47	1.37715	0.459049		df	SS	MSS	Cal F	Table F	Result		2	0.401111	2
E1T3	0.45	0.42	0.47	1.34	0.446667	Replication	2	0.00225243	0.00112621	1.63426	3.2759	NS		SE.m	0.00505206
E1T4	0.42	0.41	0.41	1.24	0.413333	Treatment	17	0.0876178	0.00515399	7.47898	1.93321	S	Factor A	CD	0.0145198
E1T5	0.477472	0.47	0.46	1.40747	0.469157	Factor A	1	0.0144917	0.0144917	21.029	4.13002	S		1	0.335	9	9
E1T6	0.51	0.43	0.47	1.41	0.47	Factor B	8	42.8971	5.36214	7781.03	2.22534	S		2	0.429525	5	5
E1T7	0.45	0.42	0.41	1.28	0.426667	A*B	8	-42.824	-5.35299	-7767.76	2.22534	NS		3	0.44	2	2
E1T8	0.45	0.47	0.46	1.38	0.46	Error	34	0.0234304	0.000689129					4	0.406667	7	7
E1T9	0.39	0.4	0.41	1.2	0.4	Total	53	0.113301		t34=	2.03224			5	0.437912	3	3
E2T1	0.39	0.3	0.24	0.93	0.31	SE.m	0.0151562							6	0.463333	1	1
E2T2	0.4	0.39	0.41	1.2	0.4	CD	0.0435593							7	0.423333	6	6
E2T3	0.42	0.43	0.45	1.3	0.433333	CV	6.28784							8	0.431667	4	4
E2T4	0.42	0.38	0.4	1.2	0.4									9	0.39	8	8
E2T5	0.41	0.41	0.4	1.22	0.406667									SE.m	0.010717
E2T6	0.48	0.42	0.47	1.37	0.456667								Factor B	CD	0.0308011
E2T7	0.41	0.39	0.46	1.26	0.42
E2T8	0.4	0.42	0.39	1.21	0.403333
E2T9	0.37	0.37	0.4	1.14	0.38
Total	7.65462	7.37	7.52	22.5446	0.417493
Mean	0.425257	0.409444	0.417778
CF	9.41222
TSSQ	0.113301	RSSQ	0.00225243
tSSQ	0.0876178	ESSQ	0.0234304
		K content
		Straw
Main factors	2
Sub factors	9	Total factors	18
Replications	3
Treatments	R1	R2	R3	Total	Mean									Factors Mean
E1T1	1.32	1.36	1.51	4.19	1.39667				ANOVA					1	1.5937	1
E1T2	1.61	1.61	1.6	4.82	1.60667		df	SS	MSS	Cal F	Table F	Result		2	1.54741	2
E1T3	1.67	1.79	1.52	4.98	1.66	Replication	2	0.00387778	0.00193889	2.81353	3.2759	NS		SE.m	0.0126882
E1T4	1.6	1.48	1.63	4.71	1.57	Treatment	17	0.468617	0.0275657	40.0007	1.93321	S	Factor A	CD	0.0364662
E1T5	1.6	1.67	1.69	4.96	1.65333	Factor A	1	0.0289352	0.0289352	41.988	4.13002	S		1	1.395	9	9
E1T6	1.69	1.77	1.71	5.17	1.72333	Factor B	8	603.63	75.4538	109491	2.22534	S		2	1.59	5	5
E1T7	1.67	1.6	1.56	4.83	1.61	A*B	8	-603.19	-75.3988	-109412	2.22534	NS		3	1.64333	2	2
E1T8	1.73	1.64	1.65	5.02	1.67333	Error	34	0.147789	0.00434673					4	1.53833	7	7
E1T9	1.41	1.46	1.48	4.35	1.45	Total	53	0.620283		t34=	2.03224			5	1.63	3	3
E2T1	1.31	1.46	1.41	4.18	1.39333	SE.m	0.0380646							6	1.69667	1	1
E2T2	1.58	1.63	1.51	4.72	1.57333	CD	0.109399							7	1.565	6	6
E2T3	1.69	1.62	1.57	4.88	1.62667	CV	4.19786							8	1.60667	4	4
E2T4	1.58	1.43	1.51	4.52	1.50667									9	1.47	8	8
E2T5	1.67	1.56	1.59	4.82	1.60667									SE.m	0.0269157
E2T6	1.69	1.71	1.61	5.01	1.67								Factor B	CD	0.0773565
E2T7	1.59	1.46	1.51	4.56	1.52
E2T8	1.56	1.5	1.56	4.62	1.54
E2T9	1.5	1.49	1.48	4.47	1.49
Total	28.47	28.24	28.1	84.81	1.57056
Mean	1.58167	1.56889	1.56111
CF	133.199
TSSQ	0.620283	RSSQ	0.00387778
tSSQ	0.468617	ESSQ	0.147789
		K uptake
		Grain
Main factors	2
Sub factors	9	Total factors	18
Replications	3
Treatments	R1	R2	R3	Total	Mean									Factors Mean
E1T1	9.54	8.968	7.3304	25.8384	8.6128				ANOVA					1	17.7873	1
E1T2	17.3941	19.412	20.445	57.2511	19.0837		df	SS	MSS	Cal F	Table F	Result		2	15.7925	2
E1T3	21.87	19.9752	21.526	63.3712	21.1237	Replication	2	3.76495	1.88247	2731.67	3.2759	S		SE.m	0.255043
E1T4	16.212	15.498	14.842	46.552	15.5173	Treatment	17	987.028	58.0605	84251.9	1.93321	S	Factor A	CD	0.732999
E1T5	21.8682	22.372	20.47	64.7102	21.5701	Factor A	1	53.7201	53.7201	77953.6	4.13002	S		1	7.7129	9	9
E1T6	26.418	21.414	22.466	70.298	23.4327	Factor B	8	75719.3	9464.92	1.37346e+07	2.22534	S		2	17.0575	5	5
E1T7	18.09	16.59	15.949	50.629	16.8763	A*B	8	-74786	-9348.25	-1.35653e+07	2.22534	NS		3	20.6219	2	2
E1T8	19.575	19.975	19.274	58.824	19.608	Error	34	59.7129	1.75626					4	15.2617	7	7
E1T9	14.235	14.28	14.268	42.783	14.261	Total	53	1050.51		t34=	2.03224			5	19.2285	3	3
E2T1	10.335	4.68	5.424	20.439	6.813	SE.m	0.765128							6	22.7137	1	1
E2T2	15.4	14.196	15.498	45.094	15.0313	CD	2.199							7	16.3063	6	6
E2T3	20.076	20.124	20.16	60.36	20.12	CV	7.89308							8	18.2647	4	4
E2T4	15.456	13.642	15.92	45.018	15.006									9	13.9418	8	8
E2T5	14.965	18.696	17	50.661	16.887									SE.m	0.541027
E2T6	22.464	21.336	22.184	65.984	21.9947								Factor B	CD	1.55493
E2T7	15.539	14.742	16.928	47.209	15.7363
E2T8	16.36	17.556	16.848	50.764	16.9213
E2T9	12.876	13.912	14.08	40.868	13.6227
Total	308.673	297.368	300.612	906.654	16.7899
Mean	17.1485	16.5205	16.7007
CF	15222.6
TSSQ	1050.51	RSSQ	3.76495
tSSQ	987.028	ESSQ	59.7129
		K uptake
		Straw
Main factors	2
Sub factors	9	Total factors	18
Replications	3
Treatments	R1	R2	R3	Total	Mean									Factors Mean
E1T1	49.368	50.048	61.608	161.024	53.6747				ANOVA					1	100.817	1
E1T2	98.532	106.582	105.92	311.034	103.678		df	SS	MSS	Cal F	Table F	Result		2	95.0131	2
E1T3	115.063	125.658	108.832	349.553	116.518	Replication	2	8.55508	4.27754	6207.17	3.2759	S		SE.m	1.20439
E1T4	98.56	88.06	105.135	291.755	97.2517	Treatment	17	19989.7	1175.87	1.70631e+06	1.93321	S	Factor A	CD	3.46146
E1T5	112.64	111.556	112.892	337.088	112.363	Factor A	1	454.801	454.801	659965	4.13002	S		1	51.9695	9	9
E1T6	120.328	136.467	115.596	372.391	124.13	Factor B	8	2.47919e+06	309899	4.49696e+08	2.22534	S		2	101.268	5	5
E1T7	106.045	97.28	100.776	304.101	101.367	A*B	8	-2.45965e+06	-307457	-4.46152e+08	2.22534	NS		3	113.887	2	2
E1T8	119.024	105.944	108.735	333.703	111.234	Error	34	1331.62	39.1652					4	94.1018	7	7
E1T9	84.459	89.936	87.024	261.419	87.1397	Total	53	21329.9		t34=	2.03224			5	109.549	3	3
E2T1	46.767	48.472	55.554	150.793	50.2643	SE.m	3.61318							6	120.939	1	1
E2T2	95.59	104.646	96.338	296.574	98.858	CD	10.3844							7	97.3345	6	6
E2T3	117.962	104.652	111.156	333.77	111.257	CV	6.39146							8	105.401	4	4
E2T4	93.062	84.513	95.281	272.856	90.952									9	86.7867	8	8
E2T5	106.045	107.952	106.212	320.209	106.736									SE.m	2.5549
E2T6	121.004	125.172	107.065	353.241	117.747								Factor B	CD	7.34286
E2T7	98.262	92.856	88.788	279.906	93.302
E2T8	97.032	98.4	103.272	298.704	99.568
E2T9	89.7	87.165	82.436	259.301	86.4337
Total	1769.44	1765.36	1752.62	5287.42	97.9152
Mean	98.3024	98.0755	97.3678
CF	517719
TSSQ	21329.9	RSSQ	8.55508
tSSQ	19989.7	ESSQ	1331.62
		K uptake
		Total
Main factors	2
Sub factors	9	Total factors	18
Replications	3
Treatments	R1	R2	R3	Total	Mean									Factors Mean
E1T1	58.908	59.016	68.9384	186.862	62.2875				ANOVA					1	118.605	#N/A
E1T2	115.926	125.994	126.365	368.285	122.762		df	SS	MSS	Cal F	Table F	Result		2	110.806	#N/A
E1T3	136.933	145.633	130.358	412.924	137.641	Replication	2	17.5219	8.76095	12713.1	3.2759	S		SE.m	1.16898
E1T4	114.772	103.558	119.977	338.307	112.769	Treatment	17	29621.8	1742.46	2.5285e+06	1.93321	S	Factor A	CD	3.35968
E1T5	134.508	133.928	133.362	401.798	133.933	Factor A	1	821.136	821.136	1.19156e+06	4.13002	S		1	59.6824	#N/A	9
E1T6	146.746	157.881	138.062	442.689	147.563	Factor B	8	3.41994e+06	427493	6.20337e+08	2.22534	S		2	118.326	#N/A	5
E1T7	124.135	113.87	116.725	354.73	118.243	A*B	8	-3.39114e+06	-423893	-6.15113e+08	2.22534	NS		3	134.509	#N/A	2
E1T8	138.599	125.919	128.009	392.527	130.842	Error	34	1254.46	36.8959					4	109.364	#N/A	7
E1T9	98.694	104.216	101.292	304.202	101.401	Total	53	30893.8		t34=	2.03224			5	128.778	#N/A	3
E2T1	57.102	53.152	60.978	171.232	57.0773	SE.m	3.50694							6	143.652	#N/A	1
E2T2	110.99	118.842	111.836	341.668	113.889	CD	10.079							7	113.641	#N/A	6
E2T3	138.038	124.776	131.316	394.13	131.377	CV	5.29549							8	123.666	#N/A	4
E2T4	108.518	98.155	111.201	317.874	105.958									9	100.728	#N/A	8
E2T5	121.01	126.648	123.212	370.87	123.623									SE.m	2.47978
E2T6	143.468	146.508	129.249	419.225	139.742								Factor B	CD	7.12696
E2T7	113.801	107.598	105.716	327.115	109.038
E2T8	113.392	115.956	120.12	349.468	116.489
E2T9	102.576	101.077	96.516	300.169	100.056
Total	2078.12	2062.73	2053.23	6194.08	114.705
Mean	115.451	114.596	114.068
CF	710492
TSSQ	30893.8	RSSQ	17.5219
tSSQ	29621.8	ESSQ	1254.46
		2020
		K content
		Grain
Main factors	2
Sub factors	9	Total factors	18
Replications	3
Treatments	R1	R2	R3	Total	Mean									Factors Mean
E1T1	0.38	0.45	0.4	1.23	0.41				ANOVA					1	0.457684	1
E1T2	0.46	0.46	0.49	1.41	0.47		df	SS	MSS	Cal F	Table F	Result		2	0.424815	2
E1T3	0.51	0.44	0.49	1.44	0.48	Replication	2	0.00146287	0.000731434	1.06139	3.2759	NS		SE.m	0.00610584
E1T4	0.41	0.46	0.43	1.3	0.433333	Treatment	17	0.100432	0.00590775	8.57277	1.93321	S	Factor A	CD	0.0175483
E1T5	0.497472	0.49	0.48	1.46747	0.489157	Factor A	1	0.0145853	0.0145853	21.1648	4.13002	S		1	0.368333	9	9
E1T6	0.46	0.55	0.45	1.46	0.486667	Factor B	8	48.0222	6.00278	8710.66	2.22534	S		2	0.451667	5	5
E1T7	0.47	0.41	0.43	1.31	0.436667	A*B	8	-47.9364	-5.99204	-8695.09	2.22534	NS		3	0.48	2	2
E1T8	0.5	0.49	0.48	1.47	0.49	Error	34	0.0342242	0.00100659					4	0.418333	7	7
E1T9	0.44	0.4	0.43	1.27	0.423333	Total	53	0.136119		t34=	2.03224			5	0.472912	3	3
E2T1	0.38	0.34	0.26	0.98	0.326667	SE.m	0.0183175							6	0.491667	1	1
E2T2	0.42	0.45	0.43	1.3	0.433333	CD	0.052645							7	0.423333	6	6
E2T3	0.51	0.45	0.48	1.44	0.48	CV	7.19023							8	0.456667	4	4
E2T4	0.44	0.36	0.41	1.21	0.403333									9	0.408333	8	8
E2T5	0.45	0.5	0.42	1.37	0.456667									SE.m	0.0129524
E2T6	0.5	0.5	0.49	1.49	0.496667								Factor B	CD	0.0372257
E2T7	0.41	0.4	0.42	1.23	0.41
E2T8	0.45	0.41	0.41	1.27	0.423333
E2T9	0.36	0.4	0.42	1.18	0.393333
Total	8.04747	7.96	7.82	23.8275	0.441249
Mean	0.447082	0.442222	0.434444
CF	10.5139
TSSQ	0.136119	RSSQ	0.00146287
tSSQ	0.100432	ESSQ	0.0342242
		Kcontent
		Straw
Main factors	2
Sub factors	9	Total factors	18
Replications	3
Treatments	R1	R2	R3	Total	Mean									Factors Mean
E1T1	1.54	1.31	1.57	4.42	1.47333				ANOVA					1	1.64407	1
E1T2	1.63	1.63	1.65	4.91	1.63667		df	SS	MSS	Cal F	Table F	Result		2	1.58519	2
E1T3	1.75	1.54	1.85	5.14	1.71333	Replication	2	0.043137	0.0215685	31.2982	3.2759	S		SE.m	0.0181736
E1T4	1.62	1.6	1.65	4.87	1.62333	Treatment	17	0.352409	0.02073	30.0814	1.93321	S	Factor A	CD	0.0522314
E1T5	1.62	1.77	1.71	5.1	1.7	Factor A	1	0.0468167	0.0468167	67.936	4.13002	S		1	1.44167	9	9
E1T6	1.71	1.79	1.73	5.23	1.74333	Factor B	8	632.237	79.0296	114680	2.22534	S		2	1.62	5	5
E1T7	1.69	1.62	1.58	4.89	1.63	A*B	8	-631.931	-78.9914	-114625	2.22534	NS		3	1.685	2	2
E1T8	1.77	1.6	1.63	5	1.66667	Error	34	0.303196	0.00891754					4	1.59667	7	7
E1T9	1.67	1.62	1.54	4.83	1.61	Total	53	0.698743		t34=	2.03224			5	1.66833	3	3
E2T1	1.4	1.15	1.68	4.23	1.41	SE.m	0.0545208							6	1.71167	1	1
E2T2	1.61	1.66	1.54	4.81	1.60333	CD	0.156694							7	1.60833	6	6
E2T3	1.72	1.65	1.6	4.97	1.65667	CV	5.84857							8	1.635	4	4
E2T4	1.61	1.56	1.54	4.71	1.57									9	1.565	8	8
E2T5	1.7	1.59	1.62	4.91	1.63667									SE.m	0.038552
E2T6	1.82	1.54	1.68	5.04	1.68								Factor B	CD	0.1108
E2T7	1.62	1.6	1.54	4.76	1.58667
E2T8	1.59	1.63	1.59	4.81	1.60333
E2T9	1.53	1.52	1.51	4.56	1.52
Total	29.6	28.38	29.21	87.19	1.61463
Mean	1.64444	1.57667	1.62278
CF	140.78
TSSQ	0.698743	RSSQ	0.043137
tSSQ	0.352409	ESSQ	0.303196
		K uptake
		Grain
Main factors	2
Sub factors	9	Total factors	18
Replications	3
Treatments	R1	R2	R3	Total	Mean									Factors Mean
E1T1	10.07	9.81	9.424	29.304	9.768				ANOVA					1	19.0925	1
E1T2	18.1976	20.056	21.805	60.0586	20.0195		df	SS	MSS	Cal F	Table F	Result		2	17.1852	2
E1T3	25.245	21.384	22.785	69.414	23.138	Replication	2	5.16047	2.58024	3744.2	3.2759	S		SE.m	0.326669
E1T4	16.236	17.894	15.824	49.954	16.6513	Treatment	17	1196.73	70.3962	102152	1.93321	S	Factor A	CD	0.938855
E1T5	23.1324	23.961	21.888	68.9814	22.9938	Factor A	1	49.113	49.113	71268.1	4.13002	S		1	8.586	9	9
E1T6	24.196	27.94	22.005	74.141	24.7137	Factor B	8	88898.6	11112.3	1.61252e+07	2.22534	S		2	18.2591	5	5
E1T7	18.706	16.154	17.544	52.404	17.468	A*B	8	-87751	-10968.9	-1.5917e+07	2.22534	NS		3	23.0023	2	2
E1T8	22.3	21.462	20.544	64.306	21.4353	Error	34	97.9621	2.88124					4	15.8287	7	7
E1T9	17.38	14.72	14.835	46.935	15.645	Total	53	1299.86		t34=	2.03224			5	21.3127	3	3
E2T1	7.638	7.684	6.89	22.212	7.404	SE.m	0.980007							6	24.6772	1	1
E2T2	16.716	15.795	16.985	49.496	16.4987	CD	2.81657							7	16.8002	6	6
E2T3	24.9645	22.275	21.36	68.5995	22.8665	CV	9.35794							8	19.8367	4	4
E2T4	16.896	13.608	14.514	45.018	15.006									9	14.9468	8	8
E2T5	16.875	23.75	18.27	58.895	19.6317									SE.m	0.692969
E2T6	23.75	26.75	23.422	73.922	24.6407								Factor B	CD	1.99161
E2T7	16.605	14.32	17.472	48.397	16.1323
E2T8	18.675	17.466	18.573	54.714	18.238
E2T9	12.816	15.44	14.49	42.746	14.2487
Total	330.399	330.469	318.63	979.498	18.1388
Mean	18.3555	18.3594	17.7017
CF	17767
TSSQ	1299.86	RSSQ	5.16047
tSSQ	1196.73	ESSQ	97.9621
		K uptake
		Straw
Main factors	2
Sub factors	9	Total factors	18
Replications	3
Treatments	R1	R2	R3	Total	Mean									Factors Mean
E1T1	60.368	50.435	66.254	177.057	59.019				ANOVA					1	105.601	1
E1T2	106.765	104.483	109.725	320.973	106.991		df	SS	MSS	Cal F	Table F	Result		2	99.1778	2
E1T3	121.1	110.572	136.53	368.202	122.734	Replication	2	144.819	72.4093	105074	3.2759	S		SE.m	1.59109
E1T4	100.278	97.44	105.435	303.153	101.051	Treatment	17	19330.6	1137.09	1.65004e+06	1.93321	S	Factor A	CD	4.57283
E1T5	113.724	121.953	115.938	351.615	117.205	Factor A	1	556.922	556.922	808153	4.13002	S		1	56.1423	9	9
E1T6	123.975	136.935	120.754	381.664	127.221	Factor B	8	2.67577e+06	334471	4.85352e+08	2.22534	S		2	104.338	5	5
E1T7	110.188	101.25	103.016	314.454	104.818	A*B	8	-2.65699e+06	-332124	-4.81947e+08	2.22534	NS		3	117.665	2	2
E1T8	125.316	100.64	112.144	338.1	112.7	Error	34	2323.98	68.3522					4	98.2797	7	7
E1T9	100.367	104.004	91.63	296.001	98.667	Total	53	21799.4		t34=	2.03224			5	113.956	3	3
E2T1	51.1	40.825	67.872	159.797	53.2657	SE.m	4.77327							6	124.142	1	1
E2T2	102.396	106.406	96.25	305.052	101.684	CD	13.7185							7	102.571	6	6
E2T3	122.98	103.125	111.68	337.785	112.595	CV	8.07462							8	110.035	4	4
E2T4	99.015	91.26	96.25	286.525	95.5083									9	94.376	8	8
E2T5	108.12	114.003	109.998	332.121	110.707									SE.m	3.37521
E2T6	132.132	115.808	115.248	363.188	121.063								Factor B	CD	9.70045
E2T7	102.384	104.8	93.786	300.97	100.323
E2T8	99.852	115.567	106.689	322.108	107.369
E2T9	101.745	90.896	77.614	270.255	90.085
Total	1881.81	1810.4	1836.81	5529.02	102.389
Mean	104.545	100.578	102.045
CF	566112
TSSQ	21799.4	RSSQ	144.819
tSSQ	19330.6	ESSQ	2323.98
		K uptake
		Total
Main factors	2
Sub factors	9	Total factors	18
Replications	3
Treatments	R1	R2	R3	Total	Mean									Factors Mean
E1T1	70.438	60.245	75.678	206.361	68.787				ANOVA					1	124.693	1
E1T2	124.963	124.539	131.53	381.032	127.011		df	SS	MSS	Cal F	Table F	Result		2	116.363	2
E1T3	146.345	131.956	159.315	437.616	145.872	Replication	2	157.823	78.9114	114509	3.2759	S		SE.m	1.67258
E1T4	116.514	115.334	121.259	353.107	117.702	Treatment	17	29748.5	1749.91	2.53931e+06	1.93321	S	Factor A	CD	4.80704
E1T5	136.856	145.914	137.826	420.596	140.199	Factor A	1	936.805	936.805	1.3594e+06	4.13002	S		1	64.7283	9	9
E1T6	148.171	164.875	142.759	455.805	151.935	Factor B	8	3.73643e+06	467053	6.77744e+08	2.22534	S		2	122.597	5	5
E1T7	128.894	117.404	120.56	366.858	122.286	A*B	8	-3.70762e+06	-463452	-6.72518e+08	2.22534	NS		3	140.667	2	2
E1T8	147.616	122.102	132.688	402.406	134.135	Error	34	2568.13	75.5332					4	114.108	7	7
E1T9	117.747	118.724	106.465	342.936	114.312	Total	53	32474.5		t34=	2.03224			5	135.269	3	3
E2T1	58.738	48.509	74.762	182.009	60.6697	SE.m	5.01774							6	148.819	1	1
E2T2	119.112	122.201	113.235	354.548	118.183	CD	14.4211							7	119.371	6	6
E2T3	147.945	125.4	133.04	406.385	135.462	CV	7.21075							8	129.871	4	4
E2T4	115.911	104.868	110.764	331.543	110.514									9	109.323	8	8
E2T5	124.995	137.753	128.268	391.016	130.339									SE.m	3.54808
E2T6	155.882	142.558	138.67	437.11	145.703								Factor B	CD	10.1973
E2T7	118.989	119.12	111.258	349.367	116.456
E2T8	118.527	133.033	125.262	376.822	125.607
E2T9	114.561	106.336	92.104	313.001	104.334
Total	2212.2	2140.87	2155.44	6508.52	120.528
Mean	122.9	118.937	119.747
CF	784459
TSSQ	32474.5	RSSQ	157.823
tSSQ	29748.5	ESSQ	2568.13

## Sheet: NPK at Harvest
		2019
		N Uptake
Main factors	2
Sub factors	9	Total factors	18
Replications	3
Treatments	R1	R2	R3	Total	Mean									Factors Mean
E1T1	206.675	200.5	191.421	598.596	199.532				ANOVA					1	225.914	1
E1T2	224.15	231.15	232.56	687.86	229.287		df	SS	MSS	Cal F	Table F	Result		2	219.176	2
E1T3	246.58	245.26	232.54	724.38	241.46	Replication	2	266.629	133.314	1.84707	3.2759	NS		SE.m	1.63499
E1T4	216.45	220.15	215.65	652.25	217.417	Treatment	17	10627.1	625.124	8.66107	1.93321	S	Factor A	CD	4.69901
E1T5	235.16	245.16	208.15	688.47	229.49	Factor A	1	612.956	612.956	8.49248	4.13002	S		1	195.561	9	9
E1T6	228.15	265.15	251.15	744.45	248.15	Factor B	8	1.20901e+07	1.51126e+06	20938.4	2.22534	S		2	225.188	5	5
E1T7	226.15	221.15	218.16	665.46	221.82	A*B	8	-1.208e+07	-1.51001e+06	-20921.1	2.22534	NS		3	239.705	2	2
E1T8	236.15	229.56	231.15	696.86	232.287	Error	34	2453.99	72.1763					4	214.75	7	7
E1T9	216.54	214.56	210.25	641.35	213.783	Total	53	13347.7		t34=	2.03224			5	225.577	4	3
E2T1	181.693	192.54	200.54	574.773	191.591	SE.m	4.90497							6	241.885	1	1
E2T2	225.15	219.56	218.56	663.27	221.09	CD	14.097							7	219.325	6	6
E2T3	238.54	240.15	235.16	713.85	237.95	CV	3.81751							8	229.443	3	4
E2T4	216.54	209.56	210.15	636.25	212.083									9	211.468	8	8
E2T5	206.58	235.16	223.25	664.99	221.663									SE.m	3.46834
E2T6	232.56	238.15	236.15	706.86	235.62								Factor B	CD	9.9681
E2T7	223.15	209.15	218.19	650.49	216.83
E2T8	218.6	230.15	231.05	679.8	226.6
E2T9	209.16	214.15	204.15	627.46	209.153
Total	3987.98	4061.21	3968.23	12017.4	222.545
Mean	221.554	225.623	220.457
CF	2.67441e+06
TSSQ	13347.7	RSSQ	266.629
tSSQ	10627.1	ESSQ	2453.99
		P Uptake
Main factors	2
Sub factors	9	Total factors	18
Replications	3
Treatments	R1	R2	R3	Total	Mean									Factors Mean
E1T1	10.3	10.9	12.5	33.7	11.2333				ANOVA					1	16.5222	1		1	0.494815
E1T2	18.5	17.8	16.8	53.1	17.7		df	SS	MSS	Cal F	Table F	Result		2	15.0648	2		2	0.471852
E1T3	17.9	18.5	18.3	54.7	18.2333	Replication	2	1.16037	0.580185	0.00803845	3.2759	NS		SE.m	0.323952			SE.m	0.00566878
E1T4	15.8	15.5	14.9	46.2	15.4	Treatment	17	367.935	21.6432	0.299867	1.93321	NS	Factor A	CD	0.931048			CD	0.0162922
E1T5	17.3	17.9	16.5	51.7	17.2333	Factor A	1	28.6745	28.6745	0.397284	4.13002	NS		1	10.5417	9	9	1	0.381667
E1T6	19.8	18.9	18.5	57.2	19.0667	Factor B	8	63711.9	7963.99	110.341	2.22534	S		2	16.7583	5	5	2	0.49
E1T7	18.5	18.9	15.5	52.9	17.6333	A*B	8	-63372.7	-7921.58	-109.753	2.22534	NS		3	18.2583	2	2	3	0.55
E1T8	17.7	17.1	17.3	52.1	17.3667	Error	34	96.3396	2.83352					4	14.3917	7	7	4	0.425
E1T9	17.6	14	12.9	44.5	14.8333	Total	53	465.435		t34=	2.03224			5	17.2083	3	3	5	0.536667
E2T1	7.95	9.35	12.25	29.55	9.85	SE.m	0.971857							6	18.725	1	1	6	0.606667
E2T2	15.95	16.55	14.95	47.45	15.8167	CD	2.79314							7	15.675	6	6	7	0.46
E2T3	18.15	18.15	18.55	54.85	18.2833	CV	10.6582							8	16.975	4	4	8	0.491667
E2T4	12.85	13.75	13.55	40.15	13.3833									9	13.6083	8	8	9	0.408333
E2T5	17.25	15.35	18.95	51.55	17.1833									SE.m	0.687207			SE.m	0.0120253
E2T6	19.55	16.75	18.85	55.15	18.3833								Factor B	CD	1.97505			CD	0.034561
E2T7	13.95	10.25	16.95	41.15	13.7167
E2T8	17.95	15.55	16.25	49.75	16.5833
E2T9	10.85	16.35	9.95	37.15	12.3833
Total	287.85	281.55	283.45	852.85	15.7935
Mean	15.9917	15.6417	15.7472
CF	13469.5
TSSQ	465.435	RSSQ	1.16037
tSSQ	367.935	ESSQ	96.3396
		K Uptake
Main factors	2
Sub factors	9	Total factors	18
Replications	3
Treatments	R1	R2	R3	Total	Mean									Factors Mean
E1T1	194.1	180.1	185.2	559.4	186.467				ANOVA					1	205.07	1
E1T2	208.6	204.4	202.1	615.1	205.033		df	SS	MSS	Cal F	Table F	Result		2	200.663	2
E1T3	215.1	214.1	216.1	645.3	215.1	Replication	2	12.1344	6.06722	0.0840612	3.2759	NS		SE.m	0.886471
E1T4	201.4	201.9	200.5	603.8	201.267	Treatment	17	4400.21	258.836	3.58617	1.93321	S	Factor A	CD	2.54774
E1T5	210.6	210.3	206.3	627.2	209.067	Factor A	1	262.241	262.241	3.63334	4.13002	NS		1	184.433	9	9
E1T6	212.6	216.6	228.6	657.8	219.267	Factor B	8	9.97542e+06	1.24693e+06	17276.1	2.22534	S		2	203.667	5	5
E1T7	202.2	203.7	201.9	607.8	202.6	A*B	8	-9.97128e+06	-1.24641e+06	-17269	2.22534	NS		3	211.65	2	2
E1T8	204.7	208.1	210.7	623.5	207.833	Error	34	721.392	21.2174					4	199.083	7	7
E1T9	202.7	201.7	192.6	597	199	Total	53	5133.74		t34=	2.03224			5	207.383	3	3
E2T1	179.1	180.7	187.4	547.2	182.4	SE.m	2.65941							6	216.417	1	1
E2T2	200.1	203.1	203.7	606.9	202.3	CD	7.64322							7	200.683	6	6
E2T3	210.1	205.1	209.4	624.6	208.2	CV	2.27057							8	205.75	4	4
E2T4	196.1	197.9	196.7	590.7	196.9									9	196.733	8	8
E2T5	206.1	208.9	202.1	617.1	205.7									SE.m	1.88049
E2T6	211.5	216.6	212.6	640.7	213.567								Factor B	CD	5.40458
E2T7	192.1	197.5	206.7	596.3	198.767
E2T8	200.4	208.5	202.1	611	203.667
E2T9	193.7	202.9	186.8	583.4	194.467
Total	3641.2	3662.1	3651.5	10954.8	202.867
Mean	202.289	203.45	202.861
CF	2.22236e+06
TSSQ	5133.74	RSSQ	12.1344
tSSQ	4400.21	ESSQ	721.392
		Organic carbon
Main factors	2
Sub factors	9	Total factors	18
Replications	3
Treatments	R1	R2	R3	Total	Mean									Factors Mean
E1T1	0.411	0.415	0.406	1.232	0.410667				ANOVA					1	0.471148	1
E1T2	0.496	0.485	0.464	1.445	0.481667		df	SS	MSS	Cal F	Table F	Result		2	0.46463	2
E1T3	0.495	0.505	0.515	1.515	0.505	Replication	2	1.23333e-05	6.16667e-06	8.5439e-08	3.2759	NS		SE.m	0.00222622
E1T4	0.445	0.435	0.441	1.321	0.440333	Treatment	17	0.0640373	0.0037669	5.21903e-05	1.93321	NS	Factor A	CD	0.00639822
E1T5	0.508	0.485	0.505	1.498	0.499333	Factor A	1	0.00057363	0.00057363	7.94762e-06	4.13002	NS		1	0.402667	9	9
E1T6	0.515	0.525	0.525	1.565	0.521667	Factor B	8	53.6415	6.70519	0.0929002	2.22534	NS		2	0.475	5	5
E1T7	0.455	0.442	0.449	1.346	0.448667	A*B	8	-53.578	-6.69725	-0.0927902	2.22534	NS		3	0.504	2	2
E1T8	0.485	0.485	0.498	1.468	0.489333	Error	34	0.00454967	0.000133814					4	0.442833	7	7
E1T9	0.438	0.448	0.445	1.331	0.443667	Total	53	0.0685993		t34=	2.03224			5	0.492833	3	3
E2T1	0.406	0.406	0.372	1.184	0.394667	SE.m	0.00667867							6	0.5145	1	1
E2T2	0.469	0.483	0.453	1.405	0.468333	CD	0.0191947							7	0.45	6	6
E2T3	0.493	0.513	0.503	1.509	0.503	CV	2.47234							8	0.487833	4	4
E2T4	0.446	0.437	0.453	1.336	0.445333									9	0.441333	8	8
E2T5	0.493	0.473	0.493	1.459	0.486333									SE.m	0.00472253
E2T6	0.513	0.493	0.516	1.522	0.507333								Factor B	CD	0.0135727
E2T7	0.445	0.446	0.463	1.354	0.451333
E2T8	0.473	0.483	0.503	1.459	0.486333
E2T9	0.435	0.453	0.429	1.317	0.439
Total	8.421	8.412	8.433	25.266	0.467889
Mean	0.467833	0.467333	0.4685
CF	11.8217
TSSQ	0.0685993	RSSQ	1.23333e-05
tSSQ	0.0640373	ESSQ	0.00454967
		2020
		Nitrogen uptake
Main factors	2
Sub factors	9	Total factors	18
Replications	3
Treatments	R1	R2	R3	Total	Mean									Factors Mean
E1T1	210.68	200.92	191.421	603.021	201.007				ANOVA					1	228.804	1
E1T2	226.31	233.135	235.717	695.162	231.721		df	SS	MSS	Cal F	Table F	Result		2	221.862	2
E1T3	250.826	247.556	235.54	733.922	244.641	Replication	2	188.383	94.1916	1.30502	3.2759	NS		SE.m	1.8408
E1T4	219.448	222.657	218.881	660.986	220.329	Treatment	17	11003.3	647.255	8.96769	1.93321	S	Factor A	CD	5.29051
E1T5	238.56	247.154	233.95	719.664	239.888	Factor A	1	650.568	650.568	9.0136	4.13002	S		1	197.902	9	9
E1T6	230.15	268.128	254.384	752.662	250.887	Factor B	8	1.2394e+07	1.54925e+06	21464.8	2.22534	S		2	227.792	5	5
E1T7	229.236	224.225	220.952	674.413	224.804	A*B	8	-1.23836e+07	-1.54795e+06	-21446.9	2.22534	NS		3	242.482	2	2
E1T8	245.56	231.941	210.64	688.141	229.38	Error	34	3110.68	91.4906					4	217.476	7	7
E1T9	220.885	216.665	212.189	649.739	216.58	Total	53	14302.4		t34=	2.03224			5	233.255	3	3
E2T1	181.693	190.16	212.54	584.393	194.798	SE.m	5.5224							6	244.91	1	1
E2T2	227.048	222.917	221.625	671.59	223.863	CD	15.8715							7	222.102	6	6
E2T3	241.51	242.303	237.156	720.969	240.323	CV	4.24486							8	227.875	4	4
E2T4	219.46	211.461	212.947	643.868	214.623									9	214.204	8	8
E2T5	215.48	238.775	225.61	679.865	226.622									SE.m	3.90492
E2T6	235.14	241.15	240.51	716.8	238.933								Factor B	CD	11.2229
E2T7	225.144	211.352	221.702	658.198	219.399
E2T8	210.45	235.45	233.207	679.107	226.369
E2T9	211.666	216.958	206.864	635.488	211.829
Total	4039.25	4102.91	4025.84	12168	225.333
Mean	224.403	227.939	223.658
CF	2.74185e+06
TSSQ	14302.4	RSSQ	188.383
tSSQ	11003.3	ESSQ	3110.68
		P uptake
Main factors	2
Sub factors	9	Total factors	18
Replications	3
Treatments	R1	R2	R3	Total	Mean									Factors Mean
E1T1	12.5	12.8	14.6	39.9	13.3				ANOVA					1	18.4096	1
E1T2	20.5	19.5	18.6	58.6	19.5333		df	SS	MSS	Cal F	Table F	Result		2	16.3141	2
E1T3	19.6	20.6	20.6	60.8	20.2667	Replication	2	1.55667	0.778335	0.0107838	3.2759	NS		SE.m	0.357835
E1T4	17.45	17.6	16.65	51.7	17.2333	Treatment	17	389.344	22.9026	0.317314	1.93321	NS	Factor A	CD	1.02843
E1T5	20.5	19.8	18.6	58.9	19.6333	Factor A	1	59.2833	59.2833	0.821368	4.13002	NS		1	12.38	9	9
E1T6	21.5	20.6	20.9	63	21	Factor B	8	76451.6	9556.45	132.404	2.22534	S		2	18.3	5	5
E1T7	20.6	20.6	16.5	57.7	19.2333	A*B	8	-76121.6	-9515.19	-131.833	2.22534	NS		3	19.8667	2	2
E1T8	19.2	18.6	19.1	56.9	18.9667	Error	34	117.546	3.45723					4	15.9667	7	7
E1T9	19.5	15.56	14.5	49.56	16.52	Total	53	508.446		t34=	2.03224			5	19.1	3	3
E2T1	8.3	9.04	17.04	34.38	11.46	SE.m	1.0735							6	20.3167	1	1
E2T2	17	17.9	16.3	51.2	17.0667	CD	3.08528							7	16.9083	6	6
E2T3	19.4	19.1	19.9	58.4	19.4667	CV	10.7095							8	18.35	4	4
E2T4	14	15	15.1	44.1	14.7									9	15.0683	8	8
E2T5	19.1	18.7	17.9	55.7	18.5667									SE.m	0.759082
E2T6	18.8	20	20.1	58.9	19.6333								Factor B	CD	2.18162
E2T7	16.1	10.65	17	43.75	14.5833
E2T8	18.3	17.3	17.6	53.2	17.7333
E2T9	14.1	15.65	11.1	40.85	13.6167
Total	316.45	309	312.09	937.54	17.3619
Mean	17.5806	17.1667	17.3383
CF	16277.4
TSSQ	508.446	RSSQ	1.55667
tSSQ	389.344	ESSQ	117.546
		K uptake
Main factors	2
Sub factors	9	Total factors	18
Replications	3
Treatments	R1	R2	R3	Total	Mean									Factors Mean
E1T1	195.675	189.5	180.421	565.596	188.532				ANOVA					1	206.555	1
E1T2	202.5	208.5	209.9	620.9	206.967		df	SS	MSS	Cal F	Table F	Result		2	202.973	2
E1T3	219.9	211.8	221.54	653.24	217.747	Replication	2	42.5654	21.2827	0.294871	3.2759	NS		SE.m	1.16789
E1T4	202.5	204.54	202.65	609.69	203.23	Treatment	17	4727.22	278.072	3.85267	1.93321	S	Factor A	CD	3.35655
E1T5	213.56	213.65	197.15	624.36	208.12	Factor A	1	173.15	173.15	2.39899	4.13002	NS		1	186.006	9	9
E1T6	217.15	226.5	217.8	661.45	220.483	Factor B	8	1.01663e+07	1.27078e+06	17606.6	2.22534	S		2	204.977	5	5
E1T7	205.56	206.65	204.54	616.75	205.583	A*B	8	-1.01617e+07	-1.27021e+06	-17598.8	2.22534	NS		3	215.94	2	2
E1T8	203.1	202.5	213.65	619.25	206.417	Error	34	1252.12	36.8271					4	200.95	7	7
E1T9	205.54	203.56	196.64	605.74	201.913	Total	53	6021.91		t34=	2.03224			5	206.875	3	3
E2T1	176.3	181.04	193.1	550.44	183.48	SE.m	3.50367							6	219.417	1	1
E2T2	198.8	208.06	202.1	608.96	202.987	CD	10.0696							7	204.207	6	6
E2T3	217.3	210.1	215	642.4	214.133	CV	2.96367							8	206.055	4	4
E2T4	200.95	198.06	197	596.01	198.67									9	198.45	8	8
E2T5	195.08	210.06	211.75	616.89	205.63									SE.m	2.47747
E2T6	211.1	226.65	217.3	655.05	218.35								Factor B	CD	7.12031
E2T7	204.15	197.65	206.69	608.49	202.83
E2T8	202	203.9	211.18	617.08	205.693
E2T9	195.06	202.65	187.25	584.96	194.987
Total	3666.22	3705.37	3685.66	11057.3	204.764
Mean	203.679	205.854	204.759
CF	2.26413e+06
TSSQ	6021.91	RSSQ	42.5654
tSSQ	4727.22	ESSQ	1252.12
		Organic Carbon
Main factors	2
Sub factors	9	Total factors	18
Replications	3
Treatments	R1	R2	R3	Total	Mean									Factors Mean
E1T1	0.4415	0.4155	0.4065	1.2635	0.421167				ANOVA					1	0.480574	1
E1T2	0.5065	0.4955	0.4745	1.4765	0.492167		df	SS	MSS	Cal F	Table F	Result		2	0.467833	2
E1T3	0.5055	0.5155	0.5255	1.5465	0.5155	Replication	2	0.000387704	0.000193852	2.68581e-06	3.2759	NS		SE.m	0.00352854
E1T4	0.4555	0.4455	0.4515	1.3525	0.450833	Treatment	17	0.0718819	0.00422835	5.85836e-05	1.93321	NS	Factor A	CD	0.0101411
E1T5	0.5185	0.4955	0.5155	1.5295	0.509833	Factor A	1	0.00219141	0.00219141	3.03619e-05	4.13002	NS		1	0.410667	9	9
E1T6	0.5255	0.5355	0.5355	1.5965	0.532167	Factor B	8	55.477	6.93462	0.096079	2.22534	NS		2	0.483	5	5
E1T7	0.4655	0.4525	0.4595	1.3775	0.459167	A*B	8	-55.4073	-6.92591	-0.0959583	2.22534	NS		3	0.512	2	2
E1T8	0.4755	0.5155	0.5085	1.4995	0.499833	Error	34	0.0114296	0.000336166					4	0.450833	7	7
E1T9	0.4485	0.4585	0.4265	1.3335	0.4445	Total	53	0.0836993		t34=	2.03224			5	0.500833	3	3
E2T1	0.4115	0.4115	0.3775	1.2005	0.400167	SE.m	0.0105856							6	0.5225	1	1
E2T2	0.4745	0.4885	0.4585	1.4215	0.473833	CD	0.0304233							7	0.458167	6	6
E2T3	0.4985	0.5185	0.5085	1.5255	0.5085	CV	3.86644							8	0.495833	4	4
E2T4	0.4515	0.4425	0.4585	1.3525	0.450833									9	0.434	8	8
E2T5	0.4985	0.4785	0.4985	1.4755	0.491833									SE.m	0.00748516
E2T6	0.5185	0.4985	0.5215	1.5385	0.512833								Factor B	CD	0.0215126
E2T7	0.4245	0.4785	0.4685	1.3715	0.457167
E2T8	0.4785	0.4885	0.5085	1.4755	0.491833
E2T9	0.4405	0.4585	0.3715	1.2705	0.4235
Total	8.539	8.593	8.475	25.607	0.474204
Mean	0.474389	0.477389	0.470833
CF	12.1429
TSSQ	0.0836993	RSSQ	0.000387704
tSSQ	0.0718819	ESSQ	0.0114296
